# Supplementary material for: Physiological and Transcriptional Changes of Three Citrus Rootstock Seedlings under Iron Deficiency
Source: Front Plant Sci. 2017 Jun 26;8:1104. doi: 10.3389/fpls.2017.01104 (PMC5483480; doi:10.3389/fpls.2017.01104)
Supplement: Supplementary file 6 [file Table_1.XLSX]

## Sheet: Table S1
Table S1 Primer sequences used in quantitative Real-time PCR experiment
ZQ		gene ID	Forward primer (5'-3')	Reward primer (5'-3')
		ACTin	CCGACCGTATGAGCAAGGAAA	TTCCTGTGGACAATGGATGGA
		orange1.1t00580	GTCCGCAGGGTGGTTTCTTA	TGCCGGAACTTGTGCAGTAT
		orange1.1t01957	TGCCCAAAGATTGTCTCGCT	GACACGTGGAATGGGGTGA
		Cs2g07760	AGATAGCCGTGGCATCATCG	AACCTTCCCCCGCCTTATTG
		Cs7g08660	GCGGTGCTACATCTGAAGGT	CACTCGCAGTGGTCCCATTA
		Cs8g16010	TCGACGTTCTTTGGGCATCA	TTGACGACGTCTTTGGAGGG
		Cs7g01400	GTGGGCCAGGGAATGTCTAC	TACCCAGCAGTCTTGCCAAC
		Cs2g23660	GGGTTTGGGGGATCGAACTT	TTCCGTACCGCACCGTTAAA
		Cs5g21860	CCGATCCAACTCACCGGAAA	AACTGGGTGCACATTGGTCA
		Cs5g28220	AGTTAGCCAAGCTGCGTGAA	TAAGGCAACACAAGCGAACG
		Cs2g15800	GGCATGTCTTGCTTTGCTTTTG	TAATGATGTTTGGGGTCGGGT
		Cs5g25370	GGTGGTTCTCGGTTCGTTCT	AACAGCCCGTTGCAAACATC
		Cs4g18450	GAGGATCTCTGGGGATTGCG	ACCGCATGCAAAAAGGAACC
		Cs8g19470	CAGTGGAGTGGATCTCGCAT	CCAGTCCAATCCTGAAGGCA
		Cs9g10620	GTGCTTTTCGCCACTCCATC	TGTCAATCTTCGGAGGCACG
		orange1.1t01275	TGAGGAAGAGGTTGATGGTTGG	GGGGTCATGCTTTGGATTGG
		Cs4g18770	CGATGGGGTTTTGGATGTGC	CGGCCTCCTGCTTGTTATCT
		Cs9g10630	ACGGTGGCTTAGAGTAATCAGC	ACTTGCCAGTGTTGCTCCTT
		Cs6g22150	GGAATTCCACCACGGAAGGT	TCACCGAGCACTTGATCCAC
		Cs7g16340	TTCCTTGGTGGTGCAACTCA	TGTACGCTAAGCCACCTTGG
		Cs2g30100	AGACAACGGCATGCCATACA	TGATCGCGTCCATAAGGTGG
XC		gene ID	Forward primer (5'-3')	Reward primer (5'-3')
		ACTin	CCGACCGTATGAGCAAGGAAA	TTCCTGTGGACAATGGATGGA
		Cs3g15140	CCATCACTCGAGCAACAAGA	TGATCAACACGCCAGAAGAG
		Cs3g19420	GCTGCACTCATATGCCTCAA	GAGGTGATATTGGTGGGGTG
		Cs3g23950	AAGAGCGACCCATAAACCCG	CCTGCATGATTTCCCAGACC
		Cs3g24170	CCACCTGTGATGATAGCGAAGC	CTGCCAATCCAACCACCAAAA
		Cs3g26100	CCAGGCCAGGTGCCGATTAT	TGCCGTGGTGGGTGGTCATA
		Cs2g11620	AAGCCGTAGCGGCAATGATA	AAGAAGATCCACAAGCGCCA
		Cs4g03130	GGGAGACGGGCGTGCTAATA	CATGTTGATCCTGGCGATTT
		Cs4g03140	TTGTGCTTGGCTCTTTGATG	CTGGAATCCTGAGCCAGAAG
		Cs7g03160	GGCGAACCGCTCTTCACTAT	TGTGCAACCAACCTTGTCCT
		Cs4g03200	CTTGGAATCAAACGGCGTAC	GGAGCTTGGGTCCAGTCAGT
		Cs4g03210	ATGCCAAACCGTGGTCCTAAT	AGGGAAAGCGTAAGAAACTGG
		Cs4g03250	CCCACTTCGACAACTTCGAT	GCTCCTTTTGCACTCCTCAC
		Cs4g07040	ATATACATATGCCGAGCCGC	GCTTTCGGACACCCTTGTAA
		Cs4g12540	GTGACACTAGATGAACCCGAACT	TTCACGTACAAGCCACCAATT
		Cs4g18450	TCGCTTGGAGTTTCACACAG	ACCGATGCTGATCCCTACTG
		Cs5g03420	TGAGTGTCATGCCAACCAAGT	CTCTAATGTCCCACCTTCACG
		Cs6g19210	CCTCCGCTCTCTGTCAAAAC	GACAACGAGAGGGACTCAGC
		Cs6g19940	GCTGAGGTTCAGTAGGGCAG	GTCTCCAAACCACCCTTCAA
		Cs7g06120	AGCCAGAACCAACTTCCCTT	AGGCCATGTAGCACCTATGC
		Cs9g01630	GGGCAGTTGGTGATGGCTCT	CTTGCGGCTATCAGCTTTGG
		Cs9g02930	GGACTCAAAGCCCTCCCTAA	CCACATCTCAGCAGCATCAC
		Cs9g13610	GGAGGAAACGGTGAGTGGT	AAGGAGATAACGGCGGCAC
TO		gene ID	Forward primer (5'-3')	Reward primer (5'-3')
		ACTin	CCGACCGTATGAGCAAGGAAA	TTCCTGTGGACAATGGATGGA
		Cs3g15140	CCATCACTCGAGCAACAAGA	TGATCAACACGCCAGAAGAG
		Cs3g19420	GCTGCACTCATATGCCTCAA	GAGGTGATATTGGTGGGGTG
		Cs3g23950	AAGAGCGACCCATAAACCCG	CCTGCATGATTTCCCAGACC
		Cs3g24170	CCACCTGTGATGATAGCGAAGC	CTGCCAATCCAACCACCAAAA
		Cs3g26100	CCAGGCCAGGTGCCGATTAT	TGCCGTGGTGGGTGGTCATA
		Cs2g11620	AAGCCGTAGCGGCAATGATA	AAGAAGATCCACAAGCGCCA
		Cs4g03130	GGGAGACGGGCGTGCTAATA	CATGTTGATCCTGGCGATTT
		Cs4g03140	TTGTGCTTGGCTCTTTGATG	CTGGAATCCTGAGCCAGAAG
		Cs7g03160	GGCGAACCGCTCTTCACTAT	TGTGCAACCAACCTTGTCCT
		Cs4g03200	CTTGGAATCAAACGGCGTAC	GGAGCTTGGGTCCAGTCAGT
		Cs4g03210	ATGCCAAACCGTGGTCCTAAT	AGGGAAAGCGTAAGAAACTGG
		Cs4g03250	CCCACTTCGACAACTTCGAT	GCTCCTTTTGCACTCCTCAC
		Cs4g07040	ATATACATATGCCGAGCCGC	GCTTTCGGACACCCTTGTAA
		Cs4g12540	GTGACACTAGATGAACCCGAACT	TTCACGTACAAGCCACCAATT
		Cs4g18450	TCGCTTGGAGTTTCACACAG	ACCGATGCTGATCCCTACTG
		Cs5g03420	TGAGTGTCATGCCAACCAAGT	CTCTAATGTCCCACCTTCACG
		Cs6g19210	CCTCCGCTCTCTGTCAAAAC	GACAACGAGAGGGACTCAGC
		Cs6g19940	GCTGAGGTTCAGTAGGGCAG	GTCTCCAAACCACCCTTCAA
		Cs7g06120	AGCCAGAACCAACTTCCCTT	AGGCCATGTAGCACCTATGC
		Cs9g01630	GGGCAGTTGGTGATGGCTCT	CTTGCGGCTATCAGCTTTGG
		Cs9g02930	GGACTCAAAGCCCTCCCTAA	CCACATCTCAGCAGCATCAC
		Cs9g13610	GGAGGAAACGGTGAGTGGT	AAGGAGATAACGGCGGCAC
The primer sequences of typical genes induced by iron deficiency
	Gene name	Gene ID	Forward primer (5'-3')	Reward primer (5'-3')
	HA1	Cs7g07300	GTCTTCAACCACCCGAAACAA	GCTTCACCACCGATTCAACAT
	HA2	Cs5g04360	TTGGCAGTTACTTGGCAATG	GCAAGCTTTCGGAAGTCATC
	FRO	Cs9g19350	GGAGGAGCCAAAACAAGATG	CAGCCAAGAAACACAGCAAA
	IRT1	Cs2g10720	CTCAGTTGGAGCCACAAACA	GTACTCCGCCTGAAGAATGC
	IRT2	Cs8g20480	CTTTGATTGGTGCTTTGCTG	TGGGTGTGTCGTGGATACAA

## Sheet: Table S2
Table S2 Summary of match data
	Sample	Total Reads	Total Bases	Total Mapped Reads (%)	Perfect Match (%)	Mismatch (%)	Unique Match(%)	Multi-position Match (%)	Total Unmapped Reads (%)
ZQ	Control 1	12889344	631577856	81.63	52.99	28.64	71.83	9.8	18.37
	Control 2	12838884	629105316	79.64	52.01	27.63	70.13	9.52	20.36
	Control 3	12858791	630080759	80.27	52.54	27.73	70.56	9.71	19.73
	Iron deficiency 1	12878940	631068060	80.42	52.62	27.79	70.58	9.84	19.58
	Iron deficiency 2	12912682	632721418	83.06	54.22	28.84	73.03	10.03	16.94
	Iron deficiency 3	12946934	634399766	79.44	51.27	28.16	69.52	9.92	20.56
XC	Control 1	12141990	594957510	82.59	52.59	30	73.16	9.43	17.41
	Control 2	12168624	596262576	83.5	55.43	28.07	73.34	10.16	16.5
	Control 3	12168681	596265369	84.85	56.8	28.05	74.63	10.22	15.15
	Iron deficiency 1	12167397	596202453	84.37	56.37	28	73.94	10.43	15.63
	Iron deficiency 2	12167711	596217839	84.04	55.7	28.34	73.59	10.45	15.96
	Iron deficiency 3	12162873	595980777	83.99	55.52	28.47	73.44	10.56	16.01
TO	Control 1	12166008	596134392	80.67	40.94	39.74	69.99	10.68	19.32
	Control 2	12167949	596229501	81.08	41.24	39.84	70.63	10.44	18.92
	Control 3	12168200	596241800	80.09	40.46	39.62	70.23	9.86	19.91
	Iron deficiency 1	12169865	596323385	79.49	40.14	39.35	69.54	9.95	20.51
	Iron deficiency 2	12169454	596303246	79.86	40.65	39.21	69.44	10.42	20.14
	Iron deficiency 3	12168270	596245230	80.55	40.59	39.96	70.28	10.27	19.45

## Sheet: Table S3
Table S3 Summary of all genes RPKM
gene_id	transcript_id(s)	controlZQ-1_FPKM	controlZQ-2_FPKM	controlZQ-3_FPKM	iron deficiencyZQ-1_FPKM	iron deficiencyZQ-2_FPKM	iron deficiencyZQ-3_FPKM	XCcontrol-1_FPKM	XCcontrol-2_FPKM	XCcontrol-3_FPKM	XCiron deficiency-1_FPKM	XCiron deficiency-2_FPKM	XCiron deficiency-3_FPKM	TOcontrol-1_FPKM	TOcontrol-2_FPKM	TOcontrol-3_FPKM	TOiron deficiency-1_FPKM	TOiron deficiency-2_FPKM	TOiron deficiency-3_FPKM	Description	KEGG Orthology	GO Component	GO Function	GO Process	Blast nr
Cs2g30010	Cs2g30010.1	7209.78	7250.87	6900.63	5540.48	5233.23	7284.49	1909.89	6623.7	5291.83	4216.55	6024.09	6162.91	2376.43	2419.75	2109.84	2158.14	1558.33	1737.7	gene=Cs2g30010 CDS=104-1030	-	-	-	-	gi|568832760|ref|XP_006470594.1|/6.41966e-102/PREDICTED: uncharacterized protein LOC102622433 [Citrus sinensis]
Cs5g04630	Cs5g04630.1	5394.3	9903.38	7593.65	6151.44	5808.04	5386	1746.38	4873.56	2258.93	1489.09	3683.36	3370.65	1871.32	1869.36	1500.42	1881.33	1357.95	1373.81	gene=Cs5g04630 CDS=28-750	K11426|1|7e-28|124|sly:101250545|SET and MYND domain-containing protein;K19476|3|5e-06|52.0|mdm:103418875|vacuolar protein sorting-associated protein IST1	-	-	-	gi|568847426|ref|XP_006477534.1|/1.06762e-103/PREDICTED: germin-like protein subfamily T member 2-like [Citrus sinensis]
Cs6g11770	Cs6g11770.1	4771.53	5086.9	4998.19	4430.33	4008.21	5515.67	423.8	1189.74	894.41	1158.21	1429.92	1331.54	1630.2	1318.78	1291.15	1200.52	1088.24	1042.54	gene=Cs6g11770 CDS=1-237	K08770|1|1e-37|155|pop:POPTR_0006s13160g|ubiquitin C	GO:0043231//intracellular membrane-bounded organelle	-	-	gi|697164993|ref|XP_009591312.1|/6.36912e-37/PREDICTED: polyubiquitin 4 [Nicotiana tomentosiformis]
Cs2g30020	Cs2g30020.1	4610.47	1466.56	2928.77	1634.29	2123.9	3991.08	65.9	1347.7	1636.54	248.92	436.37	1372.66	1015.96	666.8	734.74	832.16	544.3	764.84	gene=Cs2g30020 CDS=1-672	-	-	-	-	gi|657401713|gb|KEH40672.1|/6.78189e-24/neurofilament heavy protein, putative [Medicago truncatula]
Cs8g18470	Cs8g18470.1,Cs8g18470.2,Cs8g18470.3	4157.13	7190.02	4928.41	5895.36	5676.63	4828.66	2308.13	4588.58	4382.81	2860.59	3848.27	4586.18	2540.88	2626.47	2816.91	3157.21	3550.87	3334.16	gene=Cs8g18470 CDS=237-434	-	-	GO:0043169//cation binding;GO:0043169//cation binding	-	gi|567864350|ref|XP_006424824.1|/3.23692e-23/hypothetical protein CICLE_v10029803mg, partial [Citrus clementina]
Cs2g30040	Cs2g30040.1	4065.06	1261.04	2496.95	1481.26	1899.47	3750.27	60.7	1552.87	1852.37	237.06	508.7	1707.68	1199.17	749.28	845.06	948.22	659.27	921.57	gene=Cs2g30040 CDS=1-696	-	-	-	-	gi|657401713|gb|KEH40672.1|/9.62763e-24/neurofilament heavy protein, putative [Medicago truncatula]
Cs2g30030	Cs2g30030.1	3907.37	1107.69	2407.09	1467.77	1914.73	3852.54	167.25	2227.13	2729.19	557	799.3	2632.35	2533.74	1937.51	2087.76	2535.87	1911.8	2853.98	gene=Cs2g30030 CDS=16-1227	-	-	-	-	gi|568833093|ref|XP_006470751.1|/1.69879e-06/PREDICTED: extensin-like [Citrus sinensis]
Cs2g16860	Cs2g16860.1	3722.11	6116.74	4501.27	4972.33	4740.67	4413.66	3741.7	4871.42	4256.78	6100.33	5857.7	4947.3	2431	2207.02	3309.47	2536.67	2513.5	3070.7	gene=Cs2g16860 CDS=110-574	K01807|1|7e-07|55.1|gmx:100776813|ribose 5-phosphate isomerase A [EC:5.3.1.6]	GO:0009536//plastid	-	-	gi|568829767|ref|XP_006469189.1|/3.35014e-77/PREDICTED: MLP-like protein 43-like [Citrus sinensis]
Cs7g31410	Cs7g31410.1	3239.62	4484.73	3374.4	4972.33	4224.17	2929.31	2507.78	3102.72	3297.25	2156.82	2221.18	1272.84	3895.44	3896.85	4098.06	2250.59	2423.95	1722.74	gene=Cs7g31410 CDS=103-969	K09872|1|2e-142|506|cic:CICLE_v10032298mg|aquaporin PIP	GO:0031224//intrinsic component of membrane	-	GO:0006810//transport	gi|567886340|ref|XP_006435692.1|/1.03265e-141/hypothetical protein CICLE_v10032298mg [Citrus clementina]
Cs5g32800	Cs5g32800.1	2555.17	2194.59	2875.84	4972.33	2656.44	2829.46	2858.06	3659.44	3488.16	3786.45	3769.86	3195.52	3528.99	3552.74	3514.77	3250.18	2789.63	4064.85	gene=Cs5g32800 CDS=154-795	K00799|1|3e-120|432|cic:CICLE_v10022212mg|glutathione S-transferase [EC:2.5.1.18]	-	GO:0016765//transferase activity, transferring alkyl or aryl (other than methyl) groups	-	gi|567903570|ref|XP_006444273.1|/1.86679e-119/hypothetical protein CICLE_v10022212mg [Citrus clementina]
Cs5g25820	Cs5g25820.1	1812.15	2370.96	2934.05	4972.33	1639.3	2208.01	191.4	1015.74	610.16	224.78	607.21	956.98	1447.75	1142.73	874.24	862.06	651.12	778.31	gene=Cs5g25820 CDS=33-707	K11426|1|5e-60|231|sly:101250545|SET and MYND domain-containing protein;K19476|3|1e-15|84.3|mdm:103418875|vacuolar protein sorting-associated protein IST1	-	-	-	gi|567901648|ref|XP_006443312.1|/2.10198e-115/hypothetical protein CICLE_v10022118mg [Citrus clementina]
Cs8g09220	Cs8g09220.1	1807.84	2416.95	2003.95	4972.33	2321.56	2205.33	1523.04	2611.89	2215.28	2109.18	2506.05	1961.59	2076.95	2046.96	1808.55	1612.22	2242.06	1545.13	gene=Cs8g09220 CDS=111-629	K01802|1|9e-89|327|cic:CICLE_v10029386mg|peptidylprolyl isomerase [EC:5.2.1.8]	-	GO:0016859//cis-trans isomerase activity	GO:0044267//cellular protein metabolic process	gi|512125698|pdb|4JJM|A/2.21918e-88/Chain A, Structure Of A Cyclophilin From Citrus Sinensis (cscyp) In Complex With Cycloporin A
Cs4g11190	Cs4g11190.1	1806.58	2075.72	2027.2	4972.33	2046.34	1371.24	10106.9	3117.02	7692.19	10917.2	6145.02	4959.67	1441.87	1714.96	1646	2129.74	897.05	1797.23	gene=Cs4g11190 CDS=152-1525	K08770|1|0.0|883|dosa:Os02t0161900-01|ubiquitin C	GO:0043231//intracellular membrane-bounded organelle	-	GO:0043412//macromolecule modification;GO:0010033//response to organic substance;GO:0032502//developmental process	gi|357474763|ref|XP_003607667.1|/0/Multidrug resistance protein ABC transporter family [Medicago truncatula]
Cs3g27280	Cs3g27280.1,Cs3g27280.2,Cs3g27280.3,Cs3g27280.4	1756.83	2736.88	1719.01	4972.33	2227.13	1508.52	699.22	904.34	866.93	876.01	1349.88	1061.94	848.01	689.05	798.6	731.37	1120.74	650.49	gene=Cs3g27280 CDS=92-1573	K03781|1|0.0|1054|cic:CICLE_v10000948mg|catalase [EC:1.11.1.6]	-	GO:0005506//iron ion binding;GO:0004601//peroxidase activity;GO:0005506//iron ion binding;GO:0004601//peroxidase activity;GO:0005506//iron ion binding;GO:0004601//peroxidase activity;GO:0005506//iron ion binding;GO:0004601//peroxidase activity	GO:0042743//hydrogen peroxide metabolic process;GO:0006950//response to stress;GO:0042743//hydrogen peroxide metabolic process;GO:0006950//response to stress;GO:0042743//hydrogen peroxide metabolic process;GO:0006950//response to stress;GO:0042743//hydrogen peroxide metabolic process;GO:0006950//response to stress	gi|567885605|ref|XP_006435361.1|/0/hypothetical protein CICLE_v10000948mg [Citrus clementina]
Cs5g08710	Cs5g08710.1	1666.44	2959.41	2052.14	4972.33	3378.66	2193.31	661.7	1072.23	1191.68	497.7	871	393.82	778.29	652.25	740.53	723.77	778.91	593.89	gene=Cs5g08710 CDS=61-810	K09873|1|2e-124|446|cit:102627157|aquaporin TIP	GO:0000325//plant-type vacuole;GO:0031090//organelle membrane;GO:0031224//intrinsic component of membrane;GO:0009536//plastid	GO:0005372//water transmembrane transporter activity	GO:0006810//transport	gi|568846675|ref|XP_006477173.1|/9.63257e-124/PREDICTED: probable aquaporin TIP2-2-like [Citrus sinensis]
Cs2g03110	Cs2g03110.1,Cs2g03110.2,Cs2g03110.3	1572.7	1836.65	1460.72	4972.33	1449.08	1433.86	708.61	1292.77	1258.88	1001.88	990.95	1261.94	1264.79	1180.95	1312.23	756.02	1162.29	783.83	gene=Cs2g03110 CDS=795-1511	K00430|1|2e-147|524|cit:102631301|peroxidase [EC:1.11.1.7]	-	GO:0005506//iron ion binding;GO:0003824//catalytic activity;GO:0016209//antioxidant activity;GO:0005506//iron ion binding;GO:0003824//catalytic activity;GO:0016209//antioxidant activity	GO:0008152//metabolic process;GO:0006950//response to stress;GO:0008152//metabolic process;GO:0006950//response to stress	gi|641859531|gb|KDO78221.1|/4.50056e-178/hypothetical protein CISIN_1g019129mg [Citrus sinensis]
Cs3g21160	Cs3g21160.1	1549.3	698.56	1108.4	4972.33	1154.47	1543.8	611.17	2425.67	1942.75	1648	2458.44	3587.76	7466.03	8717.9	6764.36	5839.02	10530	7498.47	gene=Cs3g21160 CDS=23-928	-	-	-	-	gi|641864997|gb|KDO83682.1|/8.72603e-63/hypothetical protein CISIN_1g0322981mg, partial [Citrus sinensis]
Cs5g06870	Cs5g06870.1,Cs5g06870.2,Cs5g06870.3,Cs5g06870.4	1498.92	1538.07	1592.6	4972.33	1369.95	1404.52	1473.35	1393.17	1515.65	1756.92	1276.46	1502.32	1087.2	1038.02	972.93	952.67	987.59	1004.8	gene=Cs5g06870 CDS=82-1071	K00134|1|6e-112|404|cit:102624117|glyceraldehyde 3-phosphate dehydrogenase [EC:1.2.1.12]	-	GO:0016620//oxidoreductase activity, acting on the aldehyde or oxo group of donors, NAD or NADP as acceptor;GO:0000166//nucleotide binding;GO:0016620//oxidoreductase activity, acting on the aldehyde or oxo group of donors, NAD or NADP as acceptor;GO:0000166//nucleotide binding	GO:0019318//hexose metabolic process;GO:0019318//hexose metabolic process	gi|568846275|ref|XP_006476982.1|/1.49521e-180/PREDICTED: glyceraldehyde-3-phosphate dehydrogenase-like isoform X1 [Citrus sinensis]
Cs5g24520	Cs5g24520.1	1464.53	631.04	1181.69	4972.33	1027.41	1200.54	542.03	2121.72	2370.24	1252.87	1611.56	2971.42	1811.06	2009.33	1572.07	1735.34	1517.67	1774.56	gene=Cs5g24520 CDS=1585-3390	-	-	-	-	gi|568850584|ref|XP_006478990.1|/3.69763e-52/PREDICTED: extensin-2-like, partial [Citrus sinensis]
Cs2g05690	Cs2g05690.1,Cs2g05690.2,Cs2g05690.3,Cs2g05690.4,Cs2g05690.5,Cs2g05690.6,Cs2g05690.7,Cs2g05690.8	1258.28	2403.2	1519.04	4972.33	1786.41	1351.2	1933.06	1090.09	1617.07	2505.94	1684.83	1460.99	816.63	813.45	911.02	972.75	652.83	924.03	gene=Cs2g05690 CDS=531-827	-	-	-	GO:0009746;GO:0034285;GO:0009746;GO:0034285;GO:0009746;GO:0034285;GO:0009746;GO:0034285;GO:0009746;GO:0034285;GO:0009746;GO:0034285;GO:0009746;GO:0034285	gi|641858957|gb|KDO77647.1|/1.00274e-44/hypothetical protein CISIN_1g032874mg [Citrus sinensis]
Cs6g11570	Cs6g11570.1,Cs6g11570.2	1238.97	1005.41	858.28	4972.33	1116.46	1033.68	762.26	1532.08	1333.92	1166.52	1074.46	1289.45	1281.76	1677.31	950.2	657.49	1468.8	804.74	gene=Cs6g11570 CDS=122-808	K02883|1|7e-06|52.4|zma:103646289|large subunit ribosomal protein L18e	-	-	-	gi|567874397|ref|XP_006429788.1|/9.01547e-24/hypothetical protein CICLE_v10011766mg [Citrus clementina]
Cs5g27060	Cs5g27060.1	1221.46	1338.43	1036.58	4972.33	929.77	868.67	345.7	1047.93	701.13	344.1	645.99	861.11	756.33	736.58	1084.65	452.58	776.97	369.95	gene=Cs5g27060 CDS=1-408	-	-	-	-	gi|568850939|ref|XP_006479153.1|/4.85735e-29/PREDICTED: glutamic acid-rich protein-like [Citrus sinensis]
Cs8g17370	Cs8g17370.1,Cs8g17370.2,Cs8g17370.3,Cs8g17370.4	1212.35	1164.18	1290.85	4972.33	1204.26	1401.36	650	1127.2	901.94	622.23	669.84	703.49	1170.39	1023.25	1004.72	971.12	1285	1294.14	gene=Cs8g17370 CDS=423-1175	K00434|1|6e-149|483|cic:CICLE_v10030198mg|L-ascorbate peroxidase [EC:1.11.1.11]	-	-	-	gi|567864052|ref|XP_006424675.1|/5.14016e-135/hypothetical protein CICLE_v10030198mg, partial [Citrus clementina]
Cs8g16640	Cs8g16640.1,Cs8g16640.2	1201.1	1796.81	1196.37	4972.33	1469.6	1216.28	1918.78	2172.19	2496.56	1478.01	1405.49	830.95	2809.22	2660.54	3024.58	1884.05	1790.91	1400.7	gene=Cs8g16640 CDS=238-1032	K09872|1|2e-149|470|cic:CICLE_v10028975mg|aquaporin PIP	GO:0031224//intrinsic component of membrane;GO:0031224//intrinsic component of membrane	-	GO:0006810//transport;GO:0006810//transport	gi|567863852|ref|XP_006424576.1|/1.05138e-148/hypothetical protein CICLE_v10028975mg [Citrus clementina]
Cs6g17430	Cs6g17430.1,Cs6g17430.2,Cs6g17430.3	1186.57	1428.42	1402.99	4972.33	843.11	1016.27	1011.83	1245.42	1066.39	420.94	385.95	430.09	954.31	909.62	690.37	656.34	466.1	440.43	gene=Cs6g17430 CDS=218-1072	K01915|1|0.0|511|cic:CICLE_v10011785mg|glutamine synthetase [EC:6.3.1.2]	GO:0044424;GO:0044424;GO:0044424	GO:0016211;GO:0032559;GO:0016211;GO:0032559;GO:0016211;GO:0032559	GO:0006541//glutamine metabolic process;GO:0071941;GO:0006541//glutamine metabolic process;GO:0071941;GO:0006541//glutamine metabolic process;GO:0071941	gi|567876027|ref|XP_006430603.1|/0/hypothetical protein CICLE_v10011785mg [Citrus clementina]
Cs6g01660	Cs6g01660.1	1186.38	652.96	798.65	4972.33	731.94	1312.96	219.36	608.79	778.66	276.33	298.25	604.28	658.46	450.82	461.05	426.96	466.15	411.24	gene=Cs6g01660 CDS=57-935	K11426|1|3e-32|140|sly:101250545|SET and MYND domain-containing protein;K19476|3|9e-18|92.0|mdm:103418875|vacuolar protein sorting-associated protein IST1	GO:0005576//extracellular region	GO:0046914//transition metal ion binding;GO:0004871//signal transducer activity;GO:0003824//catalytic activity;GO:0016209//antioxidant activity	GO:0008152//metabolic process	gi|641837410|gb|KDO56364.1|/5.71038e-109/hypothetical protein CISIN_1g027919mg [Citrus sinensis]
Cs7g10220	Cs7g10220.1,Cs7g10220.2,Cs7g10220.3	1159.67	496.02	1146.32	4972.33	1045.53	1164.93	1111.53	595.25	870.73	833.77	497.02	631.08	1146.82	1226.56	832.86	1363.5	897.54	1287.76	gene=Cs7g10220 CDS=178-1068	K00134|1|2e-140|499|cit:102578015|glyceraldehyde 3-phosphate dehydrogenase [EC:1.2.1.12]	GO:0031967;GO:0009536//plastid;GO:0031090//organelle membrane;GO:0005576//extracellular region;GO:0031967;GO:0009536//plastid;GO:0031090//organelle membrane;GO:0005576//extracellular region	GO:0016620//oxidoreductase activity, acting on the aldehyde or oxo group of donors, NAD or NADP as acceptor;GO:0000166//nucleotide binding;GO:0046914//transition metal ion binding;GO:0000166//nucleotide binding;GO:0046914//transition metal ion binding;GO:0000166//nucleotide binding	GO:0019318//hexose metabolic process;GO:0006007//glucose catabolic process;GO:0010038//response to metal ion;GO:0000302//response to reactive oxygen species;GO:0006970//response to osmotic stress;GO:0034285;GO:0009791//post-embryonic development;GO:0048608//reproductive structure development;GO:0006007//glucose catabolic process;GO:0010038//response to metal ion;GO:0000302//response to reactive o…	gi|568861083|ref|XP_006484037.1|/0/PREDICTED: glyceraldehyde-3-phosphate dehydrogenase GAPC1, cytosolic [Citrus sinensis]
Cs2g20010	Cs2g20010.1	1152.56	1671.88	1221.41	4972.33	1572.13	1138.17	1548.97	1280.57	1908.02	1326.27	1247.22	1192.77	697.17	724.49	704.18	521.71	503.58	396.21	gene=Cs2g20010 CDS=341-880	-	-	-	-	gi|641839539|gb|KDO58468.1|/2.87728e-09/hypothetical protein CISIN_1g029569mg [Citrus sinensis]
orange1.1t05816	orange1.1t05816.1	1126.8	734.73	995.36	4972.33	976.78	1160.82	580.01	1024.34	778.53	794.46	728.08	610.13	837.21	743.65	611.46	491.83	617.61	435.91	gene=orange1.1t05816 CDS=1-207	K08770|1|2e-32|137|mpp:MICPUCDRAFT_36384|ubiquitin C;K02977|2|2e-32|137|mpp:MICPUCDRAFT_51948|small subunit ribosomal protein S27Ae	-	-	-	gi|723718419|ref|XP_010324326.1|/1.36192e-31/PREDICTED: polyubiquitin isoform X1 [Solanum lycopersicum]
Cs9g14320	Cs9g14320.1	1074.8	1382.09	1072.82	4972.33	1066.39	936.01	210.63	305.39	406.79	383.95	361.05	406.02	218.39	192.84	173.26	174.88	184.36	149.7	gene=Cs9g14320 CDS=287-868	K01051|1|3e-17|90.1|mdm:103431870|pectinesterase [EC:3.1.1.11]	-	GO:0030234//enzyme regulator activity	-	gi|568873955|ref|XP_006490090.1|/5.92301e-95/PREDICTED: 21 kDa protein-like [Citrus sinensis]
Cs1g22440	Cs1g22440.1	1035.98	1063.24	1052.57	4972.33	823.42	1062.69	116.89	322.95	258.49	296.73	418.69	399.92	205.71	177.37	170	161.79	140.44	129.85	gene=Cs1g22440 CDS=1-375	K08770|1|2e-33|140|jcu:105633027|ubiquitin C	-	-	-	gi|641860487|gb|KDO79176.1|/8.57084e-39/hypothetical protein CISIN_1g046387mg, partial [Citrus sinensis]
Cs4g06850	Cs4g06850.1,Cs4g06850.10,Cs4g06850.11,Cs4g06850.12,Cs4g06850.2,Cs4g06850.3,Cs4g06850.4,Cs4g06850.5,Cs4g06850.6,Cs4g06850.7,Cs4g06850.8,Cs4g06850.9	991.41	1068.66	962.54	4972.33	771.94	824.21	1136.65	1218.23	1171.29	553.95	627.58	760.25	1361.73	1389.74	1127.8	1077.82	1084.25	1038.75	gene=Cs4g06850 CDS=76-2493	K00695|1|0.0|1575|cit:102616003|sucrose synthase [EC:2.4.1.13]	-	-	-	gi|684138038|gb|AIN45138.1|/0/sucrose synthase [Citrus suavissima]
orange1.1t01308	orange1.1t01308.1	973.43	675.11	394.47	4972.33	1031.99	1787.72	424.33	558.1	645.42	1344.72	984.24	1628.51	513.18	431.37	497.49	554.06	958.09	655	gene=orange1.1t01308 CDS=2165-2539	K01191|1|3e-32|98.6|mdm:103411291|alpha-mannosidase [EC:3.2.1.24]	-	-	-	gi|674876610|emb|CDY55729.1|/9.03856e-114/BnaC08g46150D [Brassica napus]
Cs8g20410	Cs8g20410.1,Cs8g20410.2,Cs8g20410.3,Cs8g20410.4,Cs8g20410.5	944.61	1667.16	1062.81	4972.33	690.3	593.59	779.66	1211.61	887.79	343.83	559.07	309.24	893.49	872.26	984.21	488.55	553.25	340.59	gene=Cs8g20410 CDS=189-1571	K01953|1|0.0|965|cit:102628580|asparagine synthase (glutamine-hydrolysing) [EC:6.3.5.4]	-	GO:0016884//carbon-nitrogen ligase activity, with glutamine as amido-N-donor;GO:0016884//carbon-nitrogen ligase activity, with glutamine as amido-N-donor;GO:0016884//carbon-nitrogen ligase activity, with glutamine as amido-N-donor;GO:0016884//carbon-nitrogen ligase activity, with glutamine as amido-N-donor;GO:0016884//carbon-nitrogen ligase activity, with glutamine as amido-N-donor	GO:0006528//asparagine metabolic process;GO:0006528//asparagine metabolic process;GO:0006528//asparagine metabolic process;GO:0006528//asparagine metabolic process;GO:0006528//asparagine metabolic process	gi|568870726|ref|XP_006488550.1|/0/PREDICTED: asparagine synthetase [glutamine-hydrolyzing] 1-like [Citrus sinensis]
Cs8g16990	Cs8g16990.1,Cs8g16990.2	936.84	712.75	849.01	4972.33	902.91	968.97	732.32	639.45	696.11	938.1	640.15	549.01	861.47	802.19	672.72	560.14	586.54	505.41	gene=Cs8g16990 CDS=84-1427	K03231|1|0.0|882|cic:CICLE_v10028446mg|elongation factor 1-alpha	GO:0044424;GO:0044424	GO:0008135//translation factor activity, RNA binding;GO:0032561//guanyl ribonucleotide binding;GO:0008135//translation factor activity, RNA binding;GO:0032561//guanyl ribonucleotide binding	GO:0006412//translation;GO:0006412//translation	gi|567863960|ref|XP_006424629.1|/0/hypothetical protein CICLE_v10028446mg [Citrus clementina]
Cs9g03630	Cs9g03630.1	935.36	881.07	999.46	4972.33	846.95	1049.64	659.11	1267.27	790.39	870.79	1155.24	1122.39	1403.9	1205.77	912.81	1079.77	1528.61	1235.31	gene=Cs9g03630 CDS=407-892	K02553|1|7e-12|72.8|bvg:104906773|regulator of ribonuclease activity A	-	-	-	gi|567852607|ref|XP_006419467.1|/3.19103e-87/hypothetical protein CICLE_v10006096mg [Citrus clementina]
Cs1g08620	Cs1g08620.1	924.8	1026	958.38	4972.33	795.39	913.59	454.69	872.39	754.17	625.41	757.77	746.96	666.19	760.67	901.96	767.34	704.72	737.06	gene=Cs1g08620 CDS=304-1821	K00487|1|0.0|883|cic:CICLE_v10000921mg|trans-cinnamate 4-monooxygenase [EC:1.14.13.11]	-	GO:0016709//oxidoreductase activity, acting on paired donors, with incorporation or reduction of molecular oxygen, NAD(P)H as one donor, and incorporation of one atom of oxygen;GO:0005506//iron ion binding	GO:0008152//metabolic process	gi|572153056|ref|NP_001275824.1|/0/cinnamate 4-hydroxylase CYP73 [Citrus sinensis]
orange1.1t01892	orange1.1t01892.1	923.93	694.7	783.94	4972.33	868.68	961.54	231.86	525.79	381.11	164.02	282.71	283.03	408.54	467.28	374.21	185.68	377.44	171.44	gene=orange1.1t01892 CDS=377-1834	K01251|1|0.0|922|cit:102617645|adenosylhomocysteinase [EC:3.3.1.1]	GO:0044424	GO:0016802	GO:0044237//cellular metabolic process	gi|568879153|ref|XP_006492541.1|/0/PREDICTED: adenosylhomocysteinase-like [Citrus sinensis]
Cs3g21730	Cs3g21730.1	913.81	785.93	1229.07	4972.33	871.37	759.16	240.74	535.82	414.1	439.65	628.95	663.23	1355.51	1226.86	962.46	1041.77	938.51	1159.68	gene=Cs3g21730 CDS=227-1270	K00430|1|0.0|640|cit:102624858|peroxidase [EC:1.11.1.7]	-	GO:0005506//iron ion binding;GO:0003824//catalytic activity;GO:0016209//antioxidant activity	GO:0008152//metabolic process;GO:0006950//response to stress	gi|568838187|ref|XP_006473096.1|/0/PREDICTED: peroxidase 12-like [Citrus sinensis]
Cs6g15430	Cs6g15430.1	905.83	540.12	883.58	4972.33	787.66	896.14	1947.11	620.69	1213.45	1959.53	651.27	976.45	1015.39	1294.75	751.76	1829.43	1015.7	1794.82	gene=Cs6g15430 CDS=231-1307	K01623|1|0.0|713|cit:102610293|fructose-bisphosphate aldolase, class I [EC:4.1.2.13]	-	GO:0016832//aldehyde-lyase activity	GO:0006007//glucose catabolic process	gi|568856629|ref|XP_006481883.1|/0/PREDICTED: fructose-bisphosphate aldolase cytoplasmic isozyme-like [Citrus sinensis]
Cs3g21170	Cs3g21170.1	882.85	291.5	741.97	4972.33	669.78	955.88	243.33	1619.74	1126.88	780.76	1541.25	2142.24	2877.32	3249.02	2693.04	2462.2	4623.49	3008.33	gene=Cs3g21170 CDS=34-828	K14306|1|3e-07|57.0|pop:POPTR_0014s05610g|nuclear pore complex protein Nup62	-	-	-	gi|641864997|gb|KDO83682.1|/1.55108e-39/hypothetical protein CISIN_1g0322981mg, partial [Citrus sinensis]
Cs5g05410	Cs5g05410.1	841.57	368.09	687.37	4972.33	510.72	611.66	0	0	0	0.36	0.37	0	0	0	0	0	0	0	gene=Cs5g05410 CDS=25-765	K01673|1|6e-140|497|cit:102618326|carbonic anhydrase [EC:4.2.1.1]	-	GO:0016836//hydro-lyase activity;GO:0046914//transition metal ion binding	-	gi|568845841|ref|XP_006476774.1|/3.05989e-139/PREDICTED: carbonic anhydrase, chloroplastic-like [Citrus sinensis]
Cs9g02900	Cs9g02900.1	828.07	1221.94	1132.15	4972.33	892.12	776.54	62.76	292.84	231.56	98.75	217.01	364.89	389.66	285.3	248.55	278.15	310.81	239	gene=Cs9g02900 CDS=36-1127	K06892|1|0.0|714|cic:CICLE_v10018343mg|feruloyl-CoA ortho-hydroxylase [EC:1.14.11.-]	-	GO:0016701//oxidoreductase activity, acting on single donors with incorporation of molecular oxygen	GO:0008152//metabolic process	gi|567906667|ref|XP_006445647.1|/0/hypothetical protein CICLE_v10015700mg [Citrus clementina]
Cs7g25130	Cs7g25130.1	826.82	557.68	434.62	4972.33	951.2	1275.84	570.75	754.1	681.91	888.44	863.6	1334.92	342.37	280.75	304.61	342.55	746.98	378.78	gene=Cs7g25130 CDS=3740-4201	K01191|1|3e-24|115|mdm:103411291|alpha-mannosidase [EC:3.2.1.24]	-	-	-	gi|357488191|ref|XP_003614383.1|/3.61519e-118/hypothetical protein MTR_5g051000 [Medicago truncatula]
orange1.1t01137	orange1.1t01137.1	825.32	827.92	1406.12	4972.33	1633.71	1676.27	4.45	8.83	16.45	7.5	19.04	48.7	38.89	23.12	31.33	19.76	50.56	23.55	gene=orange1.1t01137 CDS=1-735	K18443|1|2e-52|206|rcu:RCOM_0732470|golgi-specific brefeldin A-resistance guanine nucleotide exchange factor 1;K11267|2|2e-20|100|mtr:MTR_091s0011|sister chromatid cohesion protein PDS5	-	-	-	gi|641831574|gb|KDO50629.1|/2.32129e-68/hypothetical protein CISIN_1g044745mg, partial [Citrus sinensis]
orange1.1t05798	orange1.1t05798.1	823.64	800.83	895.36	4972.33	775.85	842.11	321.26	413.68	367.95	272.4	303.87	349.04	761.71	642.39	606.84	598.27	622.43	730.88	gene=orange1.1t05798 CDS=1-248	K02183|1|3e-41|166|smo:SELMODRAFT_141966|calmodulin	-	-	-	gi|723752736|ref|XP_004252866.2|/2.09674e-40/PREDICTED: LOW QUALITY PROTEIN: calmodulin [Solanum lycopersicum]
Cs1g04550	Cs1g04550.1	815.36	1552.39	1058.02	4972.33	778.39	728.69	180.08	510.12	381.11	276.05	622.05	1114.6	119.97	96.2	142.34	358.41	374.47	337.06	gene=Cs1g04550 CDS=54-425	-	-	-	-	gi|641838189|gb|KDO57135.1|/3.55907e-53/hypothetical protein CISIN_1g033265mg [Citrus sinensis]
Cs5g04550	Cs5g04550.1	807.69	716.88	930.21	4972.33	657.6	1228.47	50.37	348.42	224.53	131.85	191.54	296.75	215.23	141.04	185.62	162.56	138.53	181.64	gene=Cs5g04550 CDS=1-672	K11426|1|6e-33|140|sly:101250545|SET and MYND domain-containing protein;K19476|3|1e-11|70.5|mdm:103418875|vacuolar protein sorting-associated protein IST1	-	-	-	gi|567894400|ref|XP_006439688.1|/7.96739e-111/hypothetical protein CICLE_v10023942mg [Citrus clementina]
Cs2g16830	Cs2g16830.1	798.37	1730.42	1029.9	4972.33	1358.11	890.97	459.91	945.44	663.61	433.47	860.18	723.91	1500.4	1863.42	2406.14	1467.7	1210.15	1724.17	gene=Cs2g16830 CDS=66-527	-	-	-	-	gi|641845736|gb|KDO64622.1|/7.84249e-86/hypothetical protein CISIN_1g031775mg [Citrus sinensis]
Cs5g32270	Cs5g32270.1	797.48	308.89	769.92	4972.33	611.47	899.04	528.89	1003.92	1132.75	1171.03	817.36	1219.28	1544.26	1429.71	1140.5	1038.87	620.8	952.13	gene=Cs5g32270 CDS=148-1164	K00430|1|0.0|678|cit:102622157|peroxidase [EC:1.11.1.7]	-	GO:0005506//iron ion binding;GO:0003824//catalytic activity;GO:0016209//antioxidant activity	GO:0008152//metabolic process;GO:0006950//response to stress	gi|568852357|ref|XP_006479844.1|/0/PREDICTED: peroxidase 3-like [Citrus sinensis]
Cs7g31420	Cs7g31420.1,Cs7g31420.2,Cs7g31420.3,Cs7g31420.4	776.27	1185.82	802.63	4972.33	962.85	698.14	1073.8	1227.88	1400.09	1077.15	1024.19	710.29	916.26	870.25	1038.65	609.72	570.85	525.55	gene=Cs7g31420 CDS=121-762	K09872|1|5e-153|427|cic:CICLE_v10032308mg|aquaporin PIP	GO:0031224//intrinsic component of membrane;GO:0031224//intrinsic component of membrane;GO:0031224//intrinsic component of membrane;GO:0031224//intrinsic component of membrane	-	GO:0006810//transport;GO:0006810//transport;GO:0006810//transport;GO:0006810//transport	gi|641850189|gb|KDO69062.1|/0/hypothetical protein CISIN_1g018895mg [Citrus sinensis]
Cs4g19580	Cs4g19580.1	771.48	1055.53	924.46	4972.33	867.51	732.65	139.76	179.73	150.7	114.36	164.97	87.43	144.92	147.03	113.54	94.31	75.54	52.4	gene=Cs4g19580 CDS=328-1071	K09873|1|3e-119|429|cit:102611770|aquaporin TIP	GO:0000325//plant-type vacuole;GO:0031224//intrinsic component of membrane	GO:0005372//water transmembrane transporter activity	GO:0006810//transport	gi|568844346|ref|XP_006476050.1|/1.56907e-118/PREDICTED: aquaporin TIP4-1-like [Citrus sinensis]
Cs8g06360	Cs8g06360.1,Cs8g06360.2	753.82	1203.18	887.59	4972.33	1014.97	873.9	197.88	166.98	204.57	339.05	282.98	232.79	143.45	155.12	82.24	120.17	81.22	84.42	gene=Cs8g06360 CDS=243-749	K13195|1|7e-34|146|gmx:100305467|cold-inducible RNA-binding protein;K12885|4|2e-26|121|smo:SELMODRAFT_18499|heterogeneous nuclear ribonucleoprotein G	GO:0009536//plastid;GO:0042579//microbody	GO:0005488;GO:0004672//protein kinase activity;GO:0004871//signal transducer activity;GO:0016620//oxidoreductase activity, acting on the aldehyde or oxo group of donors, NAD or NADP as acceptor;GO:0042802//identical protein binding;GO:0032559;GO:0043566//structure-specific DNA binding	GO:0006952//defense response;GO:0010118//stomatal movement;GO:0016070//RNA metabolic process;GO:0010038//response to metal ion;GO:0048511//rhythmic process;GO:0006405//RNA export from nucleus;GO:0006970//response to osmotic stress;GO:0009699//phenylpropanoid biosynthetic process;GO:0032392//DNA geometric change;GO:0003006//developmental process involved in reproduction;GO:0006464//cellular protei…	gi|568867630|ref|XP_006487137.1|/7.67017e-42/PREDICTED: glycine-rich RNA-binding protein-like [Citrus sinensis]
Cs3g20830	Cs3g20830.1,Cs3g20830.2,Cs3g20830.3,Cs3g20830.4,Cs3g20830.5,Cs3g20830.6,Cs3g20830.7	752.53	406.5	1062.94	4972.33	619.68	583.83	3260.08	892.3	2027.72	3270.45	1579.87	1552.24	2161.74	2315.72	2181.67	4632.18	1882.24	3890.73	gene=Cs3g20830 CDS=157-1275	K18857|1|0.0|724|cit:102618125|alcohol dehydrogenase class-P [EC:1.1.1.1]	-	GO:0016616//oxidoreductase activity, acting on the CH-OH group of donors, NAD or NADP as acceptor;GO:0046914//transition metal ion binding;GO:0016616//oxidoreductase activity, acting on the CH-OH group of donors, NAD or NADP as acceptor;GO:0046914//transition metal ion binding;GO:0016616//oxidoreductase activity, acting on the CH-OH group of donors, NAD or NADP as acceptor;GO:0046914//transition …	GO:0008152//metabolic process;GO:0008152//metabolic process;GO:0008152//metabolic process;GO:0008152//metabolic process;GO:0008152//metabolic process;GO:0008152//metabolic process;GO:0008152//metabolic process	gi|568837831|ref|XP_006472923.1|/0/PREDICTED: alcohol dehydrogenase 1-like isoform X2 [Citrus sinensis]
Cs8g09800	Cs8g09800.1	745.88	448.7	548.35	4972.33	358.58	809.17	16.93	138.82	120.81	36.08	46.26	122.08	158.19	90.6	114.4	123.14	66.71	74.63	gene=Cs8g09800 CDS=33-1220	K00660|1|0.0|756|cit:102616330|chalcone synthase [EC:2.3.1.74]	-	-	-	gi|568868377|ref|XP_006487476.1|/0/PREDICTED: chalcone synthase-like [Citrus sinensis]
Cs1g25210	Cs1g25210.1	727.09	577.63	628.59	4972.33	726.14	828.68	363.54	445.15	398.13	439.45	372.2	336.52	477.14	476.49	436.54	391.98	388.01	352.65	gene=Cs1g25210 CDS=194-976	K02938|1|3e-139|495|cic:CICLE_v10026308mg|large subunit ribosomal protein L8e	GO:0030529//intracellular ribonucleoprotein complex	GO:0005198//structural molecule activity	GO:0010467//gene expression	gi|567865781|ref|XP_006425513.1|/1.44216e-138/hypothetical protein CICLE_v10026308mg [Citrus clementina]
Cs6g15540	Cs6g15540.1,Cs6g15540.2,Cs6g15540.3,Cs6g15540.4	713.41	462.67	710.65	4972.33	635.82	659.1	913.78	522.06	655.79	1066.46	442.56	672.14	633.51	634.01	504.41	1000.63	771.82	1200.86	gene=Cs6g15540 CDS=301-1329	K01689|1|0.0|670|cit:102616210|enolase [EC:4.2.1.11]	GO:0043234//protein complex;GO:0044424;GO:0043234//protein complex;GO:0044424;GO:0043234//protein complex;GO:0044424;GO:0043234//protein complex;GO:0044424	GO:0046872//metal ion binding;GO:0016836//hydro-lyase activity;GO:0046872//metal ion binding;GO:0016836//hydro-lyase activity;GO:0046872//metal ion binding;GO:0016836//hydro-lyase activity;GO:0046872//metal ion binding;GO:0016836//hydro-lyase activity	GO:0006007//glucose catabolic process;GO:0006007//glucose catabolic process;GO:0006007//glucose catabolic process;GO:0006007//glucose catabolic process	gi|289600010|gb|ADD12953.1|/0/2-phospho-D-glycerate hydrolase [Citrus trifoliata]
Cs7g25660	Cs7g25660.1	687.18	909.74	726.72	4972.33	721.17	691.53	187.55	271.28	244.34	179.35	171.34	186.95	182.08	163.74	180.76	188.94	209.06	148.22	gene=Cs7g25660 CDS=1-222	K13113|1|6e-37|152|cic:CICLE_v10033494mg|ubiquitin-like protein 5	-	-	-	gi|568864633|ref|XP_006485697.1|/4.03272e-36/PREDICTED: ubiquitin-like protein 5-like [Citrus sinensis]
orange1.1t03005	orange1.1t03005.1	685.44	617.79	534.56	4972.33	597.38	636.37	882.51	1185.27	1376.32	1268.29	1014.3	1042.83	1131.93	1008.43	1121.71	794.63	1044.32	734.75	gene=orange1.1t03005 CDS=277-1032	K09873|1|1e-128|460|cic:CICLE_v10012553mg|aquaporin TIP	GO:0031224//intrinsic component of membrane	-	GO:0006810//transport	gi|567871741|ref|XP_006428460.1|/8.03599e-128/hypothetical protein CICLE_v10012553mg [Citrus clementina]
orange1.1t02045	orange1.1t02045.1	681.63	575.05	705.35	4972.33	511.83	621.04	301.73	783.72	508.15	275.92	383.8	427.12	958.25	892.05	794.71	539.68	557.35	502.77	gene=orange1.1t02045 CDS=18-1070	K00430|1|0.0|669|cit:102614517|peroxidase [EC:1.11.1.7]	-	GO:0005506//iron ion binding;GO:0003824//catalytic activity;GO:0016209//antioxidant activity	GO:0008152//metabolic process;GO:0006950//response to stress	gi|568879454|ref|XP_006492673.1|/0/PREDICTED: peroxidase 15-like [Citrus sinensis]
Cs3g15060	Cs3g15060.1,Cs3g15060.2,Cs3g15060.3	677.44	301.7	543.98	4972.33	537.64	791.32	199.48	412.49	303.74	121.62	138.97	242.46	434.79	403.4	376.58	299.63	529.58	398.79	gene=Cs3g15060 CDS=62-1138	K08057|1|0.0|677|cit:102618403|calreticulin	GO:0043231//intracellular membrane-bounded organelle;GO:0043231//intracellular membrane-bounded organelle;GO:0043231//intracellular membrane-bounded organelle	GO:0046872//metal ion binding;GO:0005515//protein binding;GO:0046872//metal ion binding;GO:0005515//protein binding;GO:0046872//metal ion binding;GO:0005515//protein binding	GO:0044267//cellular protein metabolic process;GO:0044267//cellular protein metabolic process;GO:0044267//cellular protein metabolic process	gi|568836306|ref|XP_006472186.1|/0/PREDICTED: calreticulin-like [Citrus sinensis]
Cs3g14440	Cs3g14440.1,Cs3g14440.2,Cs3g14440.3	676.19	1151.16	621.36	4972.33	820.04	693.85	225.59	346.32	321.89	256.75	275.53	182.86	126.27	84.38	135.74	57.54	106.29	45.14	gene=Cs3g14440 CDS=85-468	-	-	-	-	gi|567881745|ref|XP_006433431.1|/2.27015e-59/hypothetical protein CICLE_v10002843mg [Citrus clementina]
Cs2g07170	Cs2g07170.1,Cs2g07170.2	668.94	510.09	713.45	4972.33	449.78	800.59	152.77	312.93	196.86	156.87	224.08	262.9	290.28	232.24	235.76	223.32	165.39	185.27	gene=Cs2g07170 CDS=51-629	K03809|1|1e-100|366|cit:102615554|NAD(P)H dehydrogenase (quinone) [EC:1.6.5.2]	-	GO:0000166//nucleotide binding;GO:0003824//catalytic activity;GO:0000166//nucleotide binding;GO:0003824//catalytic activity	-	gi|568827169|ref|XP_006467937.1|/2.56758e-104/PREDICTED: minor allergen Alt a 7-like [Citrus sinensis]
Cs8g17010	Cs8g17010.1,Cs8g17010.2	659.81	475.08	513.22	4972.33	611.97	703.06	1269.15	1176.38	1150.31	1051.89	770.9	700.43	1838	1943.3	1743.8	1324.47	1452.55	1260.46	gene=Cs8g17010 CDS=79-1422	K03231|1|0.0|881|cic:CICLE_v10028443mg|elongation factor 1-alpha	GO:0044424;GO:0044424	GO:0008135//translation factor activity, RNA binding;GO:0032561//guanyl ribonucleotide binding;GO:0008135//translation factor activity, RNA binding;GO:0032561//guanyl ribonucleotide binding	GO:0006412//translation;GO:0006412//translation	gi|567863968|ref|XP_006424633.1|/0/hypothetical protein CICLE_v10028443mg [Citrus clementina]
Cs9g04210	Cs9g04210.1	658.45	783.01	719.49	4972.33	1157.12	667.33	3548.23	2236.57	3079.28	5111.35	3772.97	2342.63	2913.52	2844.56	2867.51	2353.58	1588.46	3357.06	gene=Cs9g04210 CDS=1-294	-	-	-	GO:0050896//response to stimulus	gi|574283308|ref|NP_001276069.1|/2.70094e-48/late embryogenesis abundant protein Lea5 [Citrus sinensis]
Cs2g14755	Cs2g14755.1	648.44	576.02	701.63	4972.33	641.41	839.17	804.27	1013.07	906.5	893.62	891.64	768.34	575.85	577.53	575.67	540.1	479.21	528	gene=Cs2g14755 CDS=55-239	K02978|1|1e-33|141|cic:CICLE_v10017332mg|small subunit ribosomal protein S27e	GO:0030529//intracellular ribonucleoprotein complex	GO:0043169//cation binding;GO:0005198//structural molecule activity	GO:0010467//gene expression	gi|674886920|emb|CDY45678.1|/9.27076e-33/BnaCnng13430D [Brassica napus]
Cs9g12510	Cs9g12510.1	644.94	466.29	615.99	4972.33	684	833.69	883.4	618.54	598.57	821.45	597.46	514.02	736.25	698.87	675.85	600.89	556.95	607.04	gene=Cs9g12510 CDS=1-726	K02981|1|3e-106|384|cic:CICLE_v10030004mg|small subunit ribosomal protein S2e	GO:0030529//intracellular ribonucleoprotein complex	GO:0003676//nucleic acid binding;GO:0005198//structural molecule activity	GO:0010467//gene expression	gi|641834693|gb|KDO53682.1|/5.21585e-106/hypothetical protein CISIN_1g024105mg [Citrus sinensis]
orange1.1t03320	orange1.1t03320.1	639.31	438.95	258.68	4972.33	656.02	1163.88	335.72	251.11	267.05	548.53	384.5	648.21	213.1	172.55	211.58	228.91	392.69	295.21	gene=orange1.1t03320 CDS=727-1308	-	-	-	-	gi|357488219|ref|XP_003614397.1|/6.68161e-90/hypothetical protein MTR_5g051160 [Medicago truncatula]
Cs9g06270	Cs9g06270.1,Cs9g06270.2,Cs9g06270.3	629.72	636.93	643.42	4972.33	520.48	502.99	687.51	592.56	697.51	575.67	626.35	372.6	366.46	335.33	308.49	568.22	428.75	524.38	gene=Cs9g06270 CDS=172-861	K01953|1|1e-08|62.4|ppp:PHYPADRAFT_173106|asparagine synthase (glutamine-hydrolysing) [EC:6.3.5.4]	-	-	-	gi|567853345|ref|XP_006419836.1|/8.2488e-131/hypothetical protein CICLE_v10005766mg [Citrus clementina]
Cs7g30845	Cs7g30845.1	625.57	488.56	625.32	4972.33	655.21	814.66	215.44	221.09	209.43	221.55	164.76	134.55	202.85	201.57	201.67	158.8	178.16	124.56	gene=Cs7g30845 CDS=232-319	-	-	-	-	-
Cs5g11260	Cs5g11260.1	612.91	674	600.24	4972.33	769.88	685.49	1133.11	757.23	837.27	1296.52	880.84	658.19	532.75	572.45	638.1	526.44	446.94	467	gene=Cs5g11260 CDS=157-639	K03263|1|2e-88|326|cit:102630849|translation initiation factor 5A	-	GO:0043021//ribonucleoprotein complex binding;GO:0008135//translation factor activity, RNA binding	GO:0006448//regulation of translational elongation;GO:0006449//regulation of translational termination;GO:0018205//peptidyl-lysine modification	gi|568847554|ref|XP_006477598.1|/1.19041e-87/PREDICTED: eukaryotic translation initiation factor 5A-2-like [Citrus sinensis]
Cs3g23180	Cs3g23180.1,Cs3g23180.2	599.8	732.09	586.57	4972.33	581.62	533.01	247.62	480.86	405.94	243.66	372.31	391.84	538.56	556.7	564.97	546.27	525.99	471.5	gene=Cs3g23180 CDS=151-1503	K16292|1|4e-141|503|ppp:PHYPADRAFT_204314|KDEL-tailed cysteine endopeptidase [EC:3.4.22.-];K01365|2|5e-139|496|rcu:RCOM_1152900|cathepsin L [EC:3.4.22.15]	-	GO:0016628//oxidoreductase activity, acting on the CH-CH group of donors, NAD or NADP as acceptor;GO:0004175//endopeptidase activity;GO:0016628//oxidoreductase activity, acting on the CH-CH group of donors, NAD or NADP as acceptor;GO:0004175//endopeptidase activity	GO:0019538//protein metabolic process;GO:0019538//protein metabolic process	gi|568838553|ref|XP_006473275.1|/0/PREDICTED: cysteine proteinase RD21a-like [Citrus sinensis]
orange1.1t01755	orange1.1t01755.1,orange1.1t01755.2	599.7	513.78	534.16	4972.33	536.08	652.42	193.72	396.79	339.63	217.17	155.96	249.01	430.82	484.46	439.58	283.4	424.23	334.14	gene=orange1.1t01755 CDS=104-1285	K00789|1|0.0|774|cit:102622739|S-adenosylmethionine synthetase [EC:2.5.1.6]	GO:0044424;GO:0044424	GO:0046872//metal ion binding;GO:0016765//transferase activity, transferring alkyl or aryl (other than methyl) groups;GO:0032559;GO:0046872//metal ion binding;GO:0016765//transferase activity, transferring alkyl or aryl (other than methyl) groups;GO:0032559	GO:0044237//cellular metabolic process;GO:0044237//cellular metabolic process	gi|641868149|gb|KDO86833.1|/0/hypothetical protein CISIN_1g015873mg [Citrus sinensis]
Cs2g19350	Cs2g19350.1	598.41	446.41	429.31	4972.33	484.51	592.55	34.51	147.15	149.55	52.47	91.3	227.85	90.99	67.53	79.39	66.57	128.09	69.97	gene=Cs2g19350 CDS=92-1303	K03456|1|2e-101|370|mus:103981635|serine/threonine-protein phosphatase 2A regulatory subunit A;K06464|2|3e-31|137|atr:105420786|integrin beta 2;K06588|2|3e-31|137|atr:105420786|integrin beta 5;K19519|2|3e-31|137|atr:105420786|transforming growth factor-beta-induced protein	-	-	-	gi|641815353|gb|KDO38095.1|/0/hypothetical protein CISIN_1g013841mg [Citrus sinensis]
Cs7g11620	Cs7g11620.1,Cs7g11620.2,Cs7g11620.3,Cs7g11620.4	591.43	708.18	589.56	4972.33	778.17	831.41	269.63	354.83	395.66	620.06	553.37	492.63	310.02	271.66	311.07	291.86	283.4	323.61	gene=Cs7g11620 CDS=114-434	K18635|1|3e-38|158|cit:102615827|protein SPIRAL1 and related proteins	-	-	-	gi|568861470|ref|XP_006484225.1|/2.23717e-37/PREDICTED: protein SPIRAL1-like 1-like isoform X1 [Citrus sinensis]
Cs8g17000	Cs8g17000.1,Cs8g17000.2	588.81	370.08	484.57	4972.33	553.05	588.52	1389.72	1278.62	1252.63	1100.23	846.04	798.53	842.51	843.62	851.7	581.64	680.62	607.3	gene=Cs8g17000 CDS=64-1407	K03231|1|0.0|878|cic:CICLE_v10028446mg|elongation factor 1-alpha	GO:0044424;GO:0044424	GO:0008135//translation factor activity, RNA binding;GO:0032561//guanyl ribonucleotide binding;GO:0008135//translation factor activity, RNA binding;GO:0032561//guanyl ribonucleotide binding	GO:0006412//translation;GO:0006412//translation	gi|567863960|ref|XP_006424629.1|/0/hypothetical protein CICLE_v10028446mg [Citrus clementina]
Cs9g04300	Cs9g04300.1,Cs9g04300.2	587.63	618.89	582.96	4972.33	751.27	719.72	1956.64	1304.89	1586.57	2097.36	1615.8	1355.66	1232.46	1222.15	1674.41	1295.32	1144.39	1441.68	gene=Cs9g04300 CDS=192-698	-	GO:0044424	-	-	gi|641852828|gb|KDO71687.1|/2.10892e-52/hypothetical protein CISIN_1g030941mg [Citrus sinensis]
Cs6g11320	Cs6g11320.1	578.08	377.16	505.96	4972.33	520.35	664.1	209.2	273.27	239.37	244.92	184.73	178.62	308.59	282.96	254.33	184.71	245.77	199.45	gene=Cs6g11320 CDS=164-571	K02901|1|7e-72|271|cit:102622469|large subunit ribosomal protein L27e	-	-	-	gi|568855532|ref|XP_006481358.1|/3.82623e-71/PREDICTED: 60S ribosomal protein L27-like [Citrus sinensis]
orange1.1t03318	orange1.1t03318.1	576.33	375.72	234.05	4972.33	592	962.86	184.84	202.73	194.24	307.21	289.41	493.4	202.61	157.61	212.09	203.77	341.54	277.64	gene=orange1.1t03318 CDS=1-738	-	-	-	-	gi|641818425|gb|KDO39227.1|/3.09332e-69/hypothetical protein CISIN_1g0366581mg, partial [Citrus sinensis]
Cs6g04560	Cs6g04560.1	574.01	772.38	513.47	4972.33	770.69	728.77	72.48	172.79	208.51	139.72	175.42	217.23	141.53	124.19	127.27	72.51	132.31	66.46	gene=Cs6g04560 CDS=47-1039	K00430|1|1e-176|619|cit:102612577|peroxidase [EC:1.11.1.7]	GO:0044464	GO:0005506//iron ion binding;GO:0003824//catalytic activity;GO:0016209//antioxidant activity	GO:0006952//defense response;GO:0008152//metabolic process	gi|568854033|ref|XP_006480640.1|/6.95533e-176/PREDICTED: peroxidase 21-like [Citrus sinensis]
Cs5g24680	Cs5g24680.1	571.49	527.23	420.94	4972.33	512.67	540.8	201.57	300.39	367.81	290.9	287.68	392.27	245.1	248.11	312.41	242.79	247.23	253.57	gene=Cs5g24680 CDS=309-1274	K00434|1|2e-108|394|sita:101761938|L-ascorbate peroxidase [EC:1.11.1.11];K01183|2|4e-48|193|sly:544146|chitinase [EC:3.2.1.14]	GO:0044464	GO:0004553//hydrolase activity, hydrolyzing O-glycosyl compounds	GO:0010035//response to inorganic substance;GO:0016049//cell growth;GO:0009725//response to hormone;GO:0006026;GO:0009913//epidermal cell differentiation;GO:0009696//salicylic acid metabolic process;GO:0006970//response to osmotic stress;GO:0009699//phenylpropanoid biosynthetic process;GO:0006109//regulation of carbohydrate metabolic process	gi|567901320|ref|XP_006443148.1|/7.18521e-172/hypothetical protein CICLE_v10021187mg [Citrus clementina]
Cs7g01840	Cs7g01840.1,Cs7g01840.2,Cs7g01840.3,Cs7g01840.4,Cs7g01840.5	563.12	298.17	494.49	4972.33	485.87	601.93	203.73	358.86	280.76	151.7	162.2	293.71	371.72	393.38	299.89	307.81	371.22	311.59	gene=Cs7g01840 CDS=129-1007	K05863|1|3e-155|548|cic:CICLE_v10033595mg|solute carrier family 25 (mitochondrial adenine nucleotide translocator), member 4/5/6/31	GO:0019866//organelle inner membrane;GO:0043231//intracellular membrane-bounded organelle;GO:0031224//intrinsic component of membrane;GO:0019866//organelle inner membrane;GO:0043231//intracellular membrane-bounded organelle;GO:0031224//intrinsic component of membrane;GO:0019866//organelle inner membrane;GO:0043231//intracellular membrane-bounded organelle;GO:0031224//intrinsic component of membra…	-	GO:0006810//transport;GO:0006810//transport;GO:0006810//transport;GO:0006810//transport;GO:0006810//transport	gi|641864707|gb|KDO83393.1|/6.43873e-157/hypothetical protein CISIN_1g016015mg [Citrus sinensis]
Cs5g27000	Cs5g27000.1,Cs5g27000.2	553.07	375.13	432.46	4972.33	479.82	544.95	84.2	283.73	160.99	39.38	67.63	87.24	262.52	272.99	244.7	123.35	275.09	124.78	gene=Cs5g27000 CDS=160-2457	K00549|1|0.0|1242|cit:102631249|5-methyltetrahydropteroyltriglutamate--homocysteine methyltransferase [EC:2.1.1.14]	-	GO:0046914//transition metal ion binding;GO:0008172//S-methyltransferase activity;GO:0046914//transition metal ion binding;GO:0008172//S-methyltransferase activity	GO:0006730//one-carbon metabolic process;GO:0000097//sulfur amino acid biosynthetic process;GO:0006730//one-carbon metabolic process;GO:0000097//sulfur amino acid biosynthetic process	gi|567901962|ref|XP_006443469.1|/0/hypothetical protein CICLE_v10018965mg [Citrus clementina]
Cs1g03110	Cs1g03110.1,Cs1g03110.2	546.36	539.89	539.8	4972.33	563.13	592.18	338.89	479.97	403.32	338.15	350.86	307.82	329.43	275.11	314.54	286.85	342.65	227.48	gene=Cs1g03110 CDS=158-493	K00940|1|2e-71|269|cit:102626041|nucleoside-diphosphate kinase [EC:2.7.4.6]	GO:0009536//plastid;GO:0042579//microbody;GO:0031090//organelle membrane;GO:0005576//extracellular region;GO:0009536//plastid;GO:0042579//microbody;GO:0031090//organelle membrane;GO:0005576//extracellular region	GO:0016776//phosphotransferase activity, phosphate group as acceptor;GO:0032559;GO:0016776//phosphotransferase activity, phosphate group as acceptor;GO:0032559	GO:0009209;GO:0010038//response to metal ion;GO:0006796//phosphate-containing compound metabolic process;GO:0009206;GO:0006970//response to osmotic stress;GO:0009132//nucleoside diphosphate metabolic process;GO:0009209;GO:0010038//response to metal ion;GO:0006796//phosphate-containing compound metabolic process;GO:0009206;GO:0006970//response to osmotic stress;GO:0009132//nucleoside diphosphate m…	gi|641866789|gb|KDO85473.1|/4.27609e-64/hypothetical protein CISIN_1g031851mg [Citrus sinensis]
Cs3g12000	Cs3g12000.1,Cs3g12000.2,Cs3g12000.3,Cs3g12000.4	542.34	562.49	577.88	4972.33	568.66	598.41	170	224.09	152.71	217.11	176.07	209.68	161.4	150.47	168.65	164.98	145.5	155.52	gene=Cs3g12000 CDS=65-523	K04565|1|3e-62|239|cic:CICLE_v10002756mg|superoxide dismutase, Cu-Zn family [EC:1.15.1.1]	-	GO:0003824//catalytic activity;GO:0016209//antioxidant activity;GO:0043169//cation binding;GO:0003824//catalytic activity;GO:0016209//antioxidant activity;GO:0043169//cation binding;GO:0003824//catalytic activity;GO:0016209//antioxidant activity;GO:0043169//cation binding;GO:0003824//catalytic activity;GO:0016209//antioxidant activity;GO:0043169//cation binding	GO:0072593//reactive oxygen species metabolic process;GO:0072593//reactive oxygen species metabolic process;GO:0072593//reactive oxygen species metabolic process;GO:0072593//reactive oxygen species metabolic process	gi|567881133|ref|XP_006433125.1|/4.13134e-76/hypothetical protein CICLE_v10002756mg [Citrus clementina]
orange1.1t02565	orange1.1t02565.1,orange1.1t02565.2	541.8	346.84	447.69	4972.33	462.05	720.89	180.06	328.07	256.07	289.07	206.9	236.22	444.19	406.08	301.09	240.4	325.12	225.88	gene=orange1.1t02565 CDS=129-386	K02942|1|5e-31|132|cic:CICLE_v10022792mg|large subunit ribosomal protein LP1	GO:0030529//intracellular ribonucleoprotein complex;GO:0030529//intracellular ribonucleoprotein complex	GO:0005198//structural molecule activity;GO:0005198//structural molecule activity	GO:0006412//translation;GO:0006412//translation	gi|567897492|ref|XP_006441234.1|/3.34391e-30/hypothetical protein CICLE_v10022792mg [Citrus clementina]
Cs2g13550	Cs2g13550.1,Cs2g13550.2	532.56	343.59	464.53	4972.33	490.44	547.19	186.44	344.92	273.96	182.59	175.23	259.67	390.95	385.28	344.46	346.29	406.32	328.01	gene=Cs2g13550 CDS=269-1555	K02133|1|0.0|720|cit:102622423|F-type H+-transporting ATPase subunit beta [EC:3.6.3.14]	GO:0033178//proton-transporting two-sector ATPase complex, catalytic domain;GO:0005753//mitochondrial proton-transporting ATP synthase complex;GO:0033178//proton-transporting two-sector ATPase complex, catalytic domain;GO:0005753//mitochondrial proton-transporting ATP synthase complex	GO:0019829//cation-transporting ATPase activity;GO:0015078//hydrogen ion transmembrane transporter activity;GO:0032559;GO:0015662//ATPase activity, coupled to transmembrane movement of ions, phosphorylative mechanism;GO:0019829//cation-transporting ATPase activity;GO:0015078//hydrogen ion transmembrane transporter activity;GO:0032559;GO:0015662//ATPase activity, coupled to transmembrane movement …	GO:0015988//energy coupled proton transmembrane transport, against electrochemical gradient;GO:0009207;GO:0015986//ATP synthesis coupled proton transport;GO:0015988//energy coupled proton transmembrane transport, against electrochemical gradient;GO:0009207;GO:0015986//ATP synthesis coupled proton transport	gi|568828957|ref|XP_006468800.1|/0/PREDICTED: ATP synthase subunit beta, mitochondrial-like [Citrus sinensis]
Cs2g03780	Cs2g03780.1	531.6	469.81	447.65	4972.33	251.34	368.83	84.51	397.6	253.17	385.05	258.58	769.24	469.72	271.18	356.13	390	869.84	243.11	gene=Cs2g03780 CDS=1-795	K08912|1|4e-154|543|cit:102625853|light-harvesting complex II chlorophyll a/b binding protein 1	GO:0009536//plastid	-	GO:0006091//generation of precursor metabolites and energy	gi|568826300|ref|XP_006467511.1|/2.31975e-153/PREDICTED: chlorophyll a-b binding protein 3C, chloroplastic-like [Citrus sinensis]
Cs6g18330	Cs6g18330.1	523.54	686.57	404.04	4972.33	787.09	813.79	337.87	179.59	259.67	475	238.77	221.75	152.86	166.17	312.68	223.25	217.65	268.35	gene=Cs6g18330 CDS=120-422	K18857|1|7e-17|87.8|vvi:100232857|alcohol dehydrogenase class-P [EC:1.1.1.1]	-	-	-	gi|568857305|ref|XP_006482207.1|/7.48494e-38/PREDICTED: probable non-specific lipid-transfer protein AKCS9-like [Citrus sinensis]
Cs7g23510	Cs7g23510.1,Cs7g23510.2,Cs7g23510.3	520.84	696.29	614.7	4972.33	844.87	691.01	1604.51	1231.08	1532.71	1922.78	1714.13	1371.5	1798.94	1732.94	2343.74	2170.27	1857.64	2282.17	gene=Cs7g23510 CDS=102-1352	K09503|1|0.0|676|cit:102608938|DnaJ homolog subfamily A member 2	GO:0044424;GO:0016020//membrane;GO:0044424;GO:0016020//membrane;GO:0044424	GO:0043169//cation binding;GO:0005515//protein binding;GO:0032559;GO:0043169//cation binding;GO:0005515//protein binding;GO:0032559;GO:0043169//cation binding;GO:0005515//protein binding;GO:0032559	GO:0006950//response to stress;GO:0044267//cellular protein metabolic process;GO:0006950//response to stress;GO:0044267//cellular protein metabolic process;GO:0006950//response to stress;GO:0044267//cellular protein metabolic process	gi|568864179|ref|XP_006485485.1|/0/PREDICTED: dnaJ protein homolog [Citrus sinensis]
Cs7g01050	Cs7g01050.1	508.5	1481.06	844.36	4972.33	873.66	675.79	38.5	161.96	82.77	41.11	72.64	141.37	179.5	170.23	190.32	135.51	128.41	152.2	gene=Cs7g01050 CDS=15-398	-	-	-	-	gi|568858507|ref|XP_006482792.1|/4.38723e-49/PREDICTED: non-specific lipid-transfer protein 8-like [Citrus sinensis]
Cs8g17900	Cs8g17900.1	506.08	509.97	468.83	4972.33	595.29	566.01	400.65	753.01	771.34	207.37	365.88	149.57	1419.6	1439.3	1277.19	789.56	877.98	735.68	gene=Cs8g17900 CDS=121-873	K09873|1|5e-127|454|cit:102621052|aquaporin TIP	GO:0031224//intrinsic component of membrane	-	GO:0006810//transport	gi|568870106|ref|XP_006488253.1|/2.88491e-126/PREDICTED: aquaporin TIP1-3-like [Citrus sinensis]
Cs9g15430	Cs9g15430.1	503.94	457.37	579.87	4972.33	363.15	343.2	1018.02	1521.75	802.71	866.69	1836.11	1444.55	1638.89	1595.49	1245	1907.48	2603.7	2069.16	gene=Cs9g15430 CDS=61-447	-	-	-	-	gi|568874134|ref|XP_006490176.1|/9.27992e-54/PREDICTED: inhibitor of trypsin and hageman factor-like [Citrus sinensis]
Cs4g08220	Cs4g08220.1,Cs4g08220.2,Cs4g08220.3	501.07	407.48	478.53	4972.33	546.55	520.41	479.62	563.34	381.75	297.36	429.51	361.69	415.69	423.03	457.02	274.02	431.79	410.41	gene=Cs4g08220 CDS=166-2013	K04079|1|0.0|1217|cic:CICLE_v10007633mg|molecular chaperone HtpG	GO:0044424;GO:0044424;GO:0044424	GO:0005515//protein binding;GO:0032559;GO:0005515//protein binding;GO:0032559;GO:0005515//protein binding;GO:0032559	GO:0044267//cellular protein metabolic process;GO:0050896//response to stimulus;GO:0044267//cellular protein metabolic process;GO:0050896//response to stimulus;GO:0044267//cellular protein metabolic process;GO:0050896//response to stimulus	gi|381144430|gb|AFF58923.1|/0/Hsp90 [Citrus sinensis]
orange1.1t01542	orange1.1t01542.1,orange1.1t01542.2,orange1.1t01542.3	488.56	665.69	490.92	4972.33	509.08	458.8	358.33	466.24	420.97	226.69	290.18	268.06	37.27	37.08	35.98	43.48	47.25	41.72	gene=orange1.1t01542 CDS=219-485	K07213|1|2e-42|172|cic:CICLE_v10033197mg|copper chaperone	-	GO:0043169//cation binding;GO:0043169//cation binding;GO:0043169//cation binding	GO:0006812//cation transport;GO:0006812//cation transport;GO:0006812//cation transport	gi|641810701|gb|KDO36992.1|/1.35655e-49/hypothetical protein CISIN_1g033693mg [Citrus sinensis]
Cs8g10180	Cs8g10180.1	485.11	755.92	572.11	4972.33	792.36	502.95	120.76	245.07	173.54	65.51	112.72	97.38	83.52	75.97	77.44	71.33	58.91	74.02	gene=Cs8g10180 CDS=38-1069	K05275|1|2e-41|170|zma:100272747|pyridoxine 4-dehydrogenase [EC:1.1.1.65];K09338|3|3e-21|103|cmo:103488762|homeobox-leucine zipper protein;K17744|4|3e-20|100|smo:SELMODRAFT_123995|L-galactose dehydrogenase [EC:1.1.1.316]	-	-	-	gi|567862190|ref|XP_006423749.1|/0/hypothetical protein CICLE_v10028769mg [Citrus clementina]
orange1.1t02041	orange1.1t02041.1	484.98	228.6	515.88	4972.33	394.84	467.86	188.33	581.86	490.17	255.71	328.66	496.49	433.82	415.77	274.2	270.77	207.01	256.94	gene=orange1.1t02041 CDS=136-1185	K00430|1|6e-178|624|cit:102614803|peroxidase [EC:1.11.1.7]	-	-	-	gi|568879458|ref|XP_006492675.1|/0/PREDICTED: peroxidase C3-like isoform X2 [Citrus sinensis]
Cs3g11410	Cs3g11410.1	475.82	360.82	442.34	4972.33	496.59	600.57	972.24	850.89	839.18	995.04	1046.72	972.31	591.85	580.26	646.1	577.78	621.42	663.23	gene=Cs3g11410 CDS=160-564	K02974|1|2e-63|243|cic:CICLE_v10002819mg|small subunit ribosomal protein S24e	-	-	-	gi|567880979|ref|XP_006433048.1|/1.12198e-62/hypothetical protein CICLE_v10002819mg [Citrus clementina]
Cs7g06720	Cs7g06720.1	472.1	674.62	404.07	4972.33	509.56	350.23	178.2	428.09	324.94	106.59	256.74	320.6	86.19	64.26	91.93	72.09	196.24	68.65	gene=Cs7g06720 CDS=35-1480	K01381|1|1e-31|139|smo:SELMODRAFT_13348|saccharopepsin [EC:3.4.23.25];K00924|3|2e-24|114|tcc:TCM_041550|	-	GO:0008233//peptidase activity	-	gi|568859990|ref|XP_006483511.1|/0/PREDICTED: protein ASPARTIC PROTEASE IN GUARD CELL 2-like [Citrus sinensis]
Cs3g03045	Cs3g03045.1	462.73	493.45	573.96	4972.33	562.09	631.35	40.53	207.03	130.4	42.97	136.51	275.91	458.65	267.9	329.56	296.7	547.22	224.26	gene=Cs3g03045 CDS=85-212	-	-	-	-	gi|568877666|ref|XP_006491845.1|/7.31777e-21/PREDICTED: cucumisin-like [Citrus sinensis]
Cs3g18030	Cs3g18030.1,Cs3g18030.2,Cs3g18030.3	459.56	358.9	451.32	4972.33	360.45	540.31	90.31	207.23	190.36	109.03	134.63	200.49	246.89	274.77	252.1	260.86	189.82	213.49	gene=Cs3g18030 CDS=118-1257	K01626|1|0.0|695|cit:102623814|3-deoxy-7-phosphoheptulonate synthase [EC:2.5.1.54]	GO:0009536//plastid;GO:0009536//plastid	GO:0016765//transferase activity, transferring alkyl or aryl (other than methyl) groups;GO:0016765//transferase activity, transferring alkyl or aryl (other than methyl) groups;GO:0016765//transferase activity, transferring alkyl or aryl (other than methyl) groups	GO:0008652//cellular amino acid biosynthetic process;GO:0008652//cellular amino acid biosynthetic process;GO:0008652//cellular amino acid biosynthetic process	gi|568837116|ref|XP_006472576.1|/0/PREDICTED: phospho-2-dehydro-3-deoxyheptonate aldolase 1, chloroplastic-like [Citrus sinensis]
Cs7g28650	Cs7g28650.1	458.74	593.02	475.9	4972.33	723.47	454.64	411.44	838.01	707.5	278.01	617.76	371.33	3305.21	3651.55	3289.49	1801.29	1975.15	1836.39	gene=Cs7g28650 CDS=112-870	K09873|1|3e-142|504|cic:CICLE_v10032534mg|aquaporin TIP	GO:0031224//intrinsic component of membrane	-	GO:0006810//transport	gi|567887082|ref|XP_006436063.1|/1.83544e-141/hypothetical protein CICLE_v10032534mg [Citrus clementina]
Cs6g21580	Cs6g21580.1	457.06	463.71	422.81	4972.33	497.56	452.65	234.57	294.38	278.68	271.01	261.71	244.36	319.16	311.46	368.71	282.49	326.52	264.1	gene=Cs6g21580 CDS=186-1454	K13210|1|7e-16|86.3|fve:101304732|far upstream element-binding protein	-	-	-	gi|568858184|ref|XP_006482634.1|/3.13042e-175/PREDICTED: uncharacterized protein At5g39570-like [Citrus sinensis]
Cs6g10280	Cs6g10280.1	452.72	581.49	458.67	4972.33	562.57	564.47	1800.78	1576.17	1894.02	2584.61	2175.62	1642.68	526.23	468.1	616.85	510.93	432.61	537.22	gene=Cs6g10280 CDS=1-447	K06689|1|5e-85|312|cit:102611214|ubiquitin-conjugating enzyme E2 D/E [EC:2.3.2.23]	-	GO:0016879//ligase activity, forming carbon-nitrogen bonds;GO:0032559	GO:0006464//cellular protein modification process	gi|568855258|ref|XP_006481224.1|/2.3403e-84/PREDICTED: ubiquitin-conjugating enzyme E2 28-like isoform X1 [Citrus sinensis]
Cs3g02125	Cs3g02125.1	451.84	634.32	424.3	4972.33	502.47	482.08	575.21	267.17	301.86	517.17	274.51	292.54	370.53	413.58	338.69	367.63	448.37	437.91	gene=Cs3g02125 CDS=79-309	-	-	-	GO:0006952//defense response	gi|567855155|ref|XP_006420697.1|/5.52943e-20/hypothetical protein CICLE_v10006362mg [Citrus clementina]
Cs3g10410	Cs3g10410.1,Cs3g10410.2,Cs3g10410.3,Cs3g10410.4	450.57	485.89	389.37	4972.33	497.48	492.3	260.39	415.32	370.98	315.33	401.04	486.53	387.36	269.74	416.62	480.14	504.94	408.83	gene=Cs3g10410 CDS=2-1234	K00654|1|3e-29|84.0|pda:103698677|serine palmitoyltransferase [EC:2.3.1.50]	-	-	-	gi|641820469|gb|KDO40410.1|/0/hypothetical protein CISIN_1g013734mg [Citrus sinensis]
Cs1g15440	Cs1g15440.1	449.95	258.72	306.62	4972.33	359.46	415.78	288.79	447	600.89	303.3	375.2	344.72	694.23	753.47	779.87	668.82	762.38	702.83	gene=Cs1g15440 CDS=142-885	K09873|1|4e-108|392|cit:102624065|aquaporin TIP	GO:0016020//membrane	-	GO:0006810//transport	gi|568822461|ref|XP_006465649.1|/2.20528e-107/PREDICTED: aquaporin TIP2-1-like [Citrus sinensis]
Cs7g31340	Cs7g31340.1,Cs7g31340.2	448.17	313.19	392.85	4972.33	413.24	494.99	256.02	281.18	232.88	227.85	162.18	141.9	448.87	443.95	349.87	253.68	297.39	233.25	gene=Cs7g31340 CDS=256-1212	K02941|1|1e-139|497|cic:CICLE_v10032141mg|large subunit ribosomal protein LP0	GO:0005840//ribosome;GO:0031981//nuclear lumen;GO:0009536//plastid;GO:0016020//membrane;GO:0005840//ribosome;GO:0031981//nuclear lumen;GO:0009536//plastid;GO:0016020//membrane	GO:0046914//transition metal ion binding;GO:0005198//structural molecule activity;GO:0046914//transition metal ion binding;GO:0005198//structural molecule activity	GO:0006412//translation;GO:0010038//response to metal ion;GO:0022613//ribonucleoprotein complex biogenesis;GO:0006970//response to osmotic stress;GO:0006412//translation;GO:0010038//response to metal ion;GO:0022613//ribonucleoprotein complex biogenesis;GO:0006970//response to osmotic stress	gi|641850182|gb|KDO69055.1|/2.67023e-160/hypothetical protein CISIN_1g020952mg [Citrus sinensis]
Cs9g10470	Cs9g10470.1,Cs9g10470.2	440.83	386.58	415.41	4972.33	377.68	421.28	187	322.57	238.54	139.08	166.04	205.77	329.86	271.52	262.78	238.42	284.91	204.08	gene=Cs9g10470 CDS=183-1181	K00025|1|2e-171|498|cit:102577998|malate dehydrogenase [EC:1.1.1.37]	-	GO:0016615//malate dehydrogenase activity;GO:0016615//malate dehydrogenase activity	GO:0009060//aerobic respiration;GO:0005975//carbohydrate metabolic process;GO:0043648//dicarboxylic acid metabolic process;GO:0009060//aerobic respiration;GO:0005975//carbohydrate metabolic process;GO:0043648//dicarboxylic acid metabolic process	gi|568873190|ref|XP_006489733.1|/9.47119e-171/PREDICTED: malate dehydrogenase [Citrus sinensis]
orange1.1t04187	orange1.1t04187.1,orange1.1t04187.2,orange1.1t04187.3,orange1.1t04187.4,orange1.1t04187.5	436.95	415.87	469.43	4972.33	513.43	489.86	441.11	485.72	463.54	368.67	441.58	517.23	442.48	422.04	411.23	462.19	408.83	456.86	gene=orange1.1t04187 CDS=179-1300	K00031|1|0.0|788|cit:102609279|isocitrate dehydrogenase [EC:1.1.1.42]	-	GO:0046872//metal ion binding;GO:0004448//isocitrate dehydrogenase activity;GO:0000166//nucleotide binding;GO:0046872//metal ion binding;GO:0004448//isocitrate dehydrogenase activity;GO:0000166//nucleotide binding;GO:0046872//metal ion binding;GO:0004448//isocitrate dehydrogenase activity;GO:0000166//nucleotide binding;GO:0046872//metal ion binding;GO:0004448//isocitrate dehydrogenase activity;GO…	GO:0009060//aerobic respiration;GO:0019752//carboxylic acid metabolic process;GO:0009060//aerobic respiration;GO:0019752//carboxylic acid metabolic process;GO:0009060//aerobic respiration;GO:0019752//carboxylic acid metabolic process;GO:0009060//aerobic respiration;GO:0019752//carboxylic acid metabolic process;GO:0009060//aerobic respiration;GO:0019752//carboxylic acid metabolic process	gi|568883656|ref|XP_006494575.1|/0/PREDICTED: isocitrate dehydrogenase [NADP]-like isoform X1 [Citrus sinensis]
Cs7g04600	Cs7g04600.1	434.32	121.75	346.41	4972.33	315.03	405.22	324.34	599.19	439.2	278.42	294.84	404.86	197.97	138.16	139.14	112.46	128.04	112.78	gene=Cs7g04600 CDS=1-696	K00799|1|6e-130|463|cit:102621583|glutathione S-transferase [EC:2.5.1.18]	-	GO:0016846//carbon-sulfur lyase activity	-	gi|568859482|ref|XP_006483268.1|/3.10634e-129/PREDICTED: glutathione S-transferase U17-like isoform X1 [Citrus sinensis]
Cs7g05800	Cs7g05800.1,Cs7g05800.2	433.14	285.75	399.31	4972.33	413.06	484.16	896.99	666.87	646.87	894.14	627.39	537.07	717.45	725.38	669.48	552.53	543.14	567.21	gene=Cs7g05800 CDS=174-653	K02949|1|6e-79|295|cic:CICLE_v10009763mg|small subunit ribosomal protein S11e	GO:0030529//intracellular ribonucleoprotein complex;GO:0009536//plastid;GO:0030529//intracellular ribonucleoprotein complex;GO:0009536//plastid	GO:0003723//RNA binding;GO:0005198//structural molecule activity;GO:0003723//RNA binding;GO:0005198//structural molecule activity	GO:0010467//gene expression;GO:0010467//gene expression	gi|567916720|ref|XP_006450366.1|/3.6183e-78/hypothetical protein CICLE_v10009763mg [Citrus clementina]
Cs5g06250	Cs5g06250.1	430.09	626.21	526.54	4972.33	354.56	411.43	195.07	334.55	324.62	209.94	162.83	209.05	97.18	99.53	68.28	66.26	56.51	64.69	gene=Cs5g06250 CDS=162-776	K01517|1|9e-56|218|atr:18442745|manganese-dependent ADP-ribose/CDP-alcohol diphosphatase [EC:3.6.1.13 3.6.1.16 3.6.1.53]	-	-	-	gi|568846109|ref|XP_006476900.1|/8.94073e-95/PREDICTED: high-affinity nitrate transporter 3.1-like [Citrus sinensis]
Cs9g10440	Cs9g10440.1	427.03	472.36	492.04	4972.33	409.98	465.94	409.66	541.59	396.68	401.92	514.3	429.17	408.74	386.81	376.78	532.23	410.42	528.68	gene=Cs9g10440 CDS=128-811	K00799|1|6e-112|404|cit:102606914|glutathione S-transferase [EC:2.5.1.18]	-	-	-	gi|568873182|ref|XP_006489729.1|/3.23e-111/PREDICTED: probable glutathione S-transferase-like [Citrus sinensis]
Cs5g28410	Cs5g28410.1,Cs5g28410.2	421.85	696.38	538.71	4972.33	366.47	310.95	1352.79	1244.8	1512.34	1414.13	1407.26	1117.58	931.13	791.76	888.41	1205.09	839.91	1101.57	gene=Cs5g28410 CDS=194-886	-	GO:0034399//nuclear periphery;GO:0034399//nuclear periphery	GO:0005506//iron ion binding;GO:0005506//iron ion binding	GO:0050896//response to stimulus;GO:0015669;GO:0050896//response to stimulus;GO:0015669	gi|568852804|ref|XP_006480060.1|/5.06702e-146/PREDICTED: uncharacterized protein LOC102630766 [Citrus sinensis]
Cs6g10270	Cs6g10270.1,Cs6g10270.2	420.58	658.35	453.16	4972.33	629.88	477.18	1481.48	1217.04	1487.61	1934.98	1935.07	1349.2	541.47	525.99	790.71	620.06	497.97	678.48	gene=Cs6g10270 CDS=263-649	K06689|1|2e-70|266|cit:102611889|ubiquitin-conjugating enzyme E2 D/E [EC:2.3.2.23]	GO:0016020//membrane;GO:0016020//membrane	GO:0019899//enzyme binding;GO:0019787//ubiquitin-like protein transferase activity;GO:0032559;GO:0019899//enzyme binding;GO:0019787//ubiquitin-like protein transferase activity;GO:0032559	GO:0070646//protein modification by small protein removal;GO:0019941//modification-dependent protein catabolic process;GO:0032446//protein modification by small protein conjugation;GO:0070646//protein modification by small protein removal;GO:0019941//modification-dependent protein catabolic process;GO:0032446//protein modification by small protein conjugation	gi|568855264|ref|XP_006481227.1|/9.32112e-70/PREDICTED: ubiquitin-conjugating enzyme E2 5B-like isoform X1 [Citrus sinensis]
Cs5g01840	Cs5g01840.1,Cs5g01840.2,Cs5g01840.3	420.04	180.35	331.55	4972.33	313.98	442.6	76.84	186.11	122.45	54.19	70.69	113.76	191.23	184.87	162.76	120.56	274.3	204.17	gene=Cs5g01840 CDS=739-2691	K09490|1|0.0|1179|cit:102621671|heat shock 70kDa protein 5	-	GO:0016628//oxidoreductase activity, acting on the CH-CH group of donors, NAD or NADP as acceptor;GO:0032559;GO:0016628//oxidoreductase activity, acting on the CH-CH group of donors, NAD or NADP as acceptor;GO:0032559;GO:0016628//oxidoreductase activity, acting on the CH-CH group of donors, NAD or NADP as acceptor;GO:0032559	GO:0008152//metabolic process;GO:0050896//response to stimulus;GO:0008152//metabolic process;GO:0050896//response to stimulus;GO:0008152//metabolic process;GO:0050896//response to stimulus	gi|568844938|ref|XP_006476337.1|/0/PREDICTED: luminal-binding protein 5-like [Citrus sinensis]
Cs8g05390	Cs8g05390.1	418.74	237.54	367.96	4972.33	420.16	558.24	248.53	181.6	182.68	255.21	128.84	144.31	124.61	122.27	107.19	94.22	114.1	78.49	gene=Cs8g05390 CDS=74-520	K02960|1|2e-80|298|cic:CICLE_v10029508mg|small subunit ribosomal protein S16e	GO:0030529//intracellular ribonucleoprotein complex	GO:0005198//structural molecule activity	GO:0010467//gene expression	gi|567860656|ref|XP_006422982.1|/1.07185e-79/hypothetical protein CICLE_v10029508mg [Citrus clementina]
Cs1g16690	Cs1g16690.1,Cs1g16690.2,Cs1g16690.3,Cs1g16690.4	418.34	460.57	431.45	4972.33	404.87	350.16	160.86	255.41	203.88	109.9	223.91	212.21	244.62	221.96	223.57	196.63	216.39	227.32	gene=Cs1g16690 CDS=32-1201	K09286|1|0.0|718|cit:102624066|EREBP-like factor	-	-	-	gi|568822806|ref|XP_006465817.1|/0/PREDICTED: ethylene-responsive transcription factor RAP2-12-like isoform X1 [Citrus sinensis]
Cs1g19393	Cs1g19393.1	414.43	81	318.6	4972.33	537.71	656.61	21.21	252.36	161.92	44.69	48.26	166.59	165.21	117.86	125.56	101.63	151.68	119.12	gene=Cs1g19393 CDS=101-286	-	-	-	GO:0006950//response to stress	gi|568823595|ref|XP_006466198.1|/6.66068e-31/PREDICTED: defensin-like protein 6-like [Citrus sinensis]
Cs7g29400	Cs7g29400.1,Cs7g29400.2	403.51	344	390.3	4972.33	421.21	473.79	221.32	253.85	216.14	297.51	231.91	209.77	339.06	315.23	300.64	319.59	272.55	281.63	gene=Cs7g29400 CDS=101-763	K02866|1|4e-118|426|cic:CICLE_v10032703mg|large subunit ribosomal protein L10e	-	-	-	gi|567886884|ref|XP_006435964.1|/2.06091e-127/hypothetical protein CICLE_v10032703mg [Citrus clementina]
Cs4g11160	Cs4g11160.1,Cs4g11160.2	403.4	551.05	483.33	4972.33	538.04	424.19	680.18	381.47	774.97	1199.57	688.69	535.68	539.74	588.98	638.6	656.64	329.7	504.48	gene=Cs4g11160 CDS=509-1198	K08770|1|2e-151|536|mpp:MICPUCDRAFT_28921|ubiquitin C	-	-	-	gi|721613749|ref|XP_010227188.1|/1.1972e-150/PREDICTED: polyubiquitin isoform X1 [Brachypodium distachyon]
Cs5g20960	Cs5g20960.1	401.96	103.28	305.44	4972.33	271.7	547.14	1.18	27.85	22.83	1.97	4.11	12.37	4.51	2.74	4.72	1.67	3.08	0.9	gene=Cs5g20960 CDS=1-1032	K07119|1|0.0|693|cit:102616685|uncharacterized protein	-	GO:0003824//catalytic activity;GO:0046914//transition metal ion binding	GO:0008152//metabolic process	gi|568849619|ref|XP_006478546.1|/0/PREDICTED: 2-alkenal reductase (NADP(+)-dependent)-like [Citrus sinensis]
Cs4g09420	Cs4g09420.1,Cs4g09420.2	400.89	274.23	372.87	4972.33	417.9	469.65	907.83	725.68	723.65	999.53	803.89	741.19	767.72	757.05	733.52	657.26	651.57	692.41	gene=Cs4g09420 CDS=172-843	K02995|1|2e-80|299|cic:CICLE_v10009415mg|small subunit ribosomal protein S8e	GO:0030529//intracellular ribonucleoprotein complex;GO:0009536//plastid;GO:0030529//intracellular ribonucleoprotein complex;GO:0009536//plastid	-	-	gi|567920982|ref|XP_006452497.1|/2.22829e-93/hypothetical protein CICLE_v10009415mg [Citrus clementina]
Cs1g16180	Cs1g16180.1	400.45	137.21	248.19	4972.33	292.09	422.38	92.5	231.56	230.95	41.82	56.12	118.9	278.69	305.34	204.62	106.84	274.16	166.27	gene=Cs1g16180 CDS=237-1538	K00924|1|3e-20|100|ath:AT5G22850|;K01381|4|9e-20|99.4|smo:SELMODRAFT_13348|saccharopepsin [EC:3.4.23.25]	-	GO:0004175//endopeptidase activity	GO:0019538//protein metabolic process	gi|567879761|ref|XP_006432439.1|/0/hypothetical protein CICLE_v10001212mg [Citrus clementina]
Cs5g05240	Cs5g05240.1,Cs5g05240.2,Cs5g05240.3,Cs5g05240.4	399.19	560.98	422.86	4972.33	442.55	366.07	529.49	549.19	534.98	899.73	648.67	683.66	390.16	354.28	424.83	488.07	473.76	475.01	gene=Cs5g05240 CDS=437-1627	K00128|1|0.0|935|cit:102613074|aldehyde dehydrogenase (NAD+) [EC:1.2.1.3]	-	GO:0016620//oxidoreductase activity, acting on the aldehyde or oxo group of donors, NAD or NADP as acceptor;GO:0016620//oxidoreductase activity, acting on the aldehyde or oxo group of donors, NAD or NADP as acceptor;GO:0016620//oxidoreductase activity, acting on the aldehyde or oxo group of donors, NAD or NADP as acceptor;GO:0016620//oxidoreductase activity, acting on the aldehyde or oxo group of…	GO:0008152//metabolic process;GO:0008152//metabolic process;GO:0008152//metabolic process;GO:0008152//metabolic process	gi|568845802|ref|XP_006476755.1|/0/PREDICTED: aldehyde dehydrogenase family 2 member B4, mitochondrial-like [Citrus sinensis]
Cs6g03850	Cs6g03850.1,Cs6g03850.2	398.85	548.68	495.37	4972.33	429.78	382.4	381.02	586.49	430.69	187.23	358.2	298.98	373.36	352.44	386.25	358.45	356.3	282.18	gene=Cs6g03850 CDS=121-735	K00799|1|4e-133|474|cit:102612576|glutathione S-transferase [EC:2.5.1.18]	-	GO:0003824//catalytic activity;GO:0003824//catalytic activity	-	gi|568853845|ref|XP_006480549.1|/4.1024e-148/PREDICTED: glutathione S-transferase L3-like [Citrus sinensis]
Cs5g25790	Cs5g25790.1	397.76	309.21	416.74	4972.33	278.45	515.15	49.79	253.15	146.74	46.4	122.25	190.49	331.08	226.66	188.35	175.43	156.65	179.95	gene=Cs5g25790 CDS=52-726	K11426|1|1e-61|236|sly:101250545|SET and MYND domain-containing protein;K19476|3|5e-16|85.5|mdm:103418875|vacuolar protein sorting-associated protein IST1	-	-	-	gi|567901644|ref|XP_006443310.1|/1.08581e-118/hypothetical protein CICLE_v10022111mg [Citrus clementina]
Cs8g04525	Cs8g04525.1	397.26	292.8	339.85	4972.33	387.15	409.4	49.82	159.45	174.33	46.01	95.51	164.92	399.41	443.97	448.18	408.04	628.34	537.7	gene=Cs8g04525 CDS=195-566	-	-	-	-	gi|568867251|ref|XP_006486954.1|/1.10273e-12/PREDICTED: classical arabinogalactan protein 9-like [Citrus sinensis]
Cs6g10600	Cs6g10600.1,Cs6g10600.2,Cs6g10600.3,Cs6g10600.4	395.31	304.07	403.67	4972.33	353.68	342.12	869.8	384.71	618.97	919.68	353.43	542.93	489.76	553.93	424.36	623.02	418.51	625.93	gene=Cs6g10600 CDS=426-1691	K15633|1|0.0|849|cic:CICLE_v10011402mg|2,3-bisphosphoglycerate-independent phosphoglycerate mutase [EC:5.4.2.12]	GO:0044424;GO:0044424;GO:0044424;GO:0044424	GO:0046914//transition metal ion binding;GO:0016868//intramolecular transferase activity, phosphotransferases;GO:0046914//transition metal ion binding;GO:0016868//intramolecular transferase activity, phosphotransferases;GO:0046914//transition metal ion binding;GO:0016868//intramolecular transferase activity, phosphotransferases;GO:0046914//transition metal ion binding;GO:0016868//intramolecular t…	GO:0050896//response to stimulus;GO:0006007//glucose catabolic process;GO:0050896//response to stimulus;GO:0006007//glucose catabolic process;GO:0050896//response to stimulus;GO:0006007//glucose catabolic process;GO:0050896//response to stimulus;GO:0006007//glucose catabolic process	gi|567874151|ref|XP_006429665.1|/0/hypothetical protein CICLE_v10011402mg [Citrus clementina]
Cs7g16770	Cs7g16770.1,Cs7g16770.2,Cs7g16770.3	395.29	288.23	378.63	4972.33	386.83	483.63	463.91	432.72	413.07	409.24	337.37	326.7	359.88	365.72	333.81	269.78	283.67	252.27	gene=Cs7g16770 CDS=243-644	K02912|1|9e-63|240|cic:CICLE_v10032912mg|large subunit ribosomal protein L32e	GO:0030529//intracellular ribonucleoprotein complex;GO:0030529//intracellular ribonucleoprotein complex;GO:0030529//intracellular ribonucleoprotein complex	GO:0005198//structural molecule activity;GO:0005198//structural molecule activity;GO:0005198//structural molecule activity	GO:0010467//gene expression;GO:0010467//gene expression;GO:0010467//gene expression	gi|567889410|ref|XP_006437227.1|/1.66551e-77/hypothetical protein CICLE_v10032912mg [Citrus clementina]
orange1.1t05710	orange1.1t05710.1	391.87	489.87	484.59	4972.33	449.76	517.15	61.18	207.79	141.42	169.35	414.98	297.36	148.41	135.71	120.51	93.96	92.96	132.02	gene=orange1.1t05710 CDS=1-303	K08770|1|2e-50|197|mpp:MICPUCDRAFT_28921|ubiquitin C	-	-	-	gi|723718419|ref|XP_010324326.1|/1.41887e-49/PREDICTED: polyubiquitin isoform X1 [Solanum lycopersicum]
Cs4g13300	Cs4g13300.1,Cs4g13300.2,Cs4g13300.3	387.8	262.12	389.94	4972.33	407.53	481.53	278.54	228.02	207.82	260.95	146.15	147.71	253.59	257.19	207.21	180.09	186.36	178.34	gene=Cs4g13300 CDS=248-700	K02903|1|2e-79|296|cic:CICLE_v10009798mg|large subunit ribosomal protein L28e	GO:0030529//intracellular ribonucleoprotein complex;GO:0030529//intracellular ribonucleoprotein complex;GO:0030529//intracellular ribonucleoprotein complex	GO:0005198//structural molecule activity;GO:0005198//structural molecule activity;GO:0005198//structural molecule activity	GO:0010467//gene expression;GO:0010467//gene expression;GO:0010467//gene expression	gi|567918744|ref|XP_006451378.1|/1.08921e-78/hypothetical protein CICLE_v10009798mg [Citrus clementina]
Cs9g09330	Cs9g09330.1	383.02	301.12	359.58	4972.33	372.53	490.99	216.75	219.58	177.88	239.61	156.14	140.46	390.88	358.55	406.61	361.95	361.67	375.66	gene=Cs9g09330 CDS=12-557	K02894|1|4e-76|285|dosa:Os02t0814700-01|large subunit ribosomal protein L23e	GO:0030529//intracellular ribonucleoprotein complex	GO:0005198//structural molecule activity	GO:0010467//gene expression	gi|629094248|gb|KCW60243.1|/1.28831e-75/hypothetical protein EUGRSUZ_H02959 [Eucalyptus grandis]
Cs7g24940	Cs7g24940.1	380.2	294.53	366.96	4972.33	233.85	332.6	47.67	205.9	171.12	82.22	123.35	172.61	105.45	99.29	108.51	69.21	103.41	102.93	gene=Cs7g24940 CDS=171-2339	K10775|1|0.0|1400|cic:CICLE_v10030821mg|phenylalanine ammonia-lyase [EC:4.3.1.24]	GO:0044424	GO:0016840	GO:0006558//L-phenylalanine metabolic process	gi|567887848|ref|XP_006436446.1|/0/hypothetical protein CICLE_v10030821mg [Citrus clementina]
Cs8g09250	Cs8g09250.1	375.46	436.76	363.46	4972.33	467.23	399.27	87.25	180.48	146.52	133.45	141.57	108.35	368.34	397.38	335.43	285.85	383.51	302.75	gene=Cs8g09250 CDS=77-619	K01802|1|3e-81|302|cic:CICLE_v10029386mg|peptidylprolyl isomerase [EC:5.2.1.8]	-	GO:0016859//cis-trans isomerase activity	GO:0044267//cellular protein metabolic process	gi|568868252|ref|XP_006487422.1|/1.17908e-92/PREDICTED: peptidyl-prolyl cis-trans isomerase 1-like [Citrus sinensis]
Cs4g05470	Cs4g05470.1,Cs4g05470.2	375.22	79.51	184.47	4972.33	199.92	353.27	10.3	78.26	101.45	13.92	26.5	114.8	30.56	20.01	19.36	11.97	24.55	9.59	gene=Cs4g05470 CDS=209-796	K02883|1|6e-07|56.6|zma:103646289|large subunit ribosomal protein L18e	-	-	-	gi|567922158|ref|XP_006453085.1|/2.37875e-31/hypothetical protein CICLE_v10009567mg [Citrus clementina]
Cs7g24930	Cs7g24930.1	375.21	308.32	370.24	4972.33	370.96	463.25	210.88	335.94	333.14	270.16	279.35	406.88	122.02	125.36	112.34	103.95	119.21	113.95	gene=Cs7g24930 CDS=330-1355	K00856|1|0.0|691|cic:CICLE_v10032021mg|adenosine kinase [EC:2.7.1.20]	-	GO:0019206//nucleoside kinase activity	GO:0043101//purine-containing compound salvage;GO:0006796//phosphate-containing compound metabolic process	gi|567887850|ref|XP_006436447.1|/0/hypothetical protein CICLE_v10032021mg [Citrus clementina]
Cs5g28080	Cs5g28080.1	372.53	218.03	359	4972.33	267.62	505.95	12.41	62.09	62.88	30.88	32.33	93.48	194.13	135.5	112.16	97.3	75.43	84.01	gene=Cs5g28080 CDS=139-534	-	-	GO:0046914//transition metal ion binding	-	gi|567902262|ref|XP_006443619.1|/6.66973e-63/hypothetical protein CICLE_v10022827mg [Citrus clementina]
Cs5g16290	Cs5g16290.1	372.01	564.37	425.67	4972.33	419.69	416.11	187.32	249.31	251.46	232.91	236.81	230.91	434.05	472.34	479.97	409.63	561.25	424.32	gene=Cs5g16290 CDS=1-1101	K13066|1|0.0|735|cit:102629858|caffeic acid 3-O-methyltransferase [EC:2.1.1.68]	-	GO:0005515//protein binding;GO:0008171//O-methyltransferase activity	GO:0006730//one-carbon metabolic process;GO:0009699//phenylpropanoid biosynthetic process	gi|568848596|ref|XP_006478090.1|/0/PREDICTED: caffeic acid 3-O-methyltransferase-like [Citrus sinensis]
Cs5g33470	Cs5g33470.1,Cs5g33470.2	370.49	326.18	513.42	4972.33	297.24	238.14	1998.28	502.15	1482.06	2374.08	1419.57	1392.03	403.41	517.46	451.71	1090.26	450.19	1006.03	gene=Cs5g33470 CDS=525-2573	K00695|1|0.0|784|cit:102615040|sucrose synthase [EC:2.4.1.13]	-	-	-	gi|641868474|gb|KDO87158.1|/0/hypothetical protein CISIN_1g003492mg [Citrus sinensis]
Cs6g07530	Cs6g07530.1,Cs6g07530.2	369.43	281.77	343.8	4972.33	360.95	454.57	213.15	244.03	202.83	227.84	161.67	162.91	244.83	256.96	232.21	219.55	242.48	217.98	gene=Cs6g07530 CDS=66-404	K02917|1|6e-61|234|cic:CICLE_v10013164mg|large subunit ribosomal protein L35Ae	GO:0030529//intracellular ribonucleoprotein complex;GO:0030529//intracellular ribonucleoprotein complex	GO:0005198//structural molecule activity;GO:0005198//structural molecule activity	GO:0010467//gene expression;GO:0010467//gene expression	gi|567873355|ref|XP_006429267.1|/3.29641e-60/hypothetical protein CICLE_v10013164mg [Citrus clementina]
Cs8g03680	Cs8g03680.1,Cs8g03680.2	368.59	292.81	282.68	4972.33	328.67	384.22	53.33	125	103.66	40.05	46.57	74.96	219.69	251.08	240.37	133.8	216.57	143.89	gene=Cs8g03680 CDS=216-1568	K07374|1|0.0|840|atr:18442468|tubulin alpha	GO:0032991//macromolecular complex;GO:0015630//microtubule cytoskeleton;GO:0032991//macromolecular complex;GO:0015630//microtubule cytoskeleton	GO:0017111//nucleoside-triphosphatase activity;GO:0032561//guanyl ribonucleotide binding;GO:0017111//nucleoside-triphosphatase activity;GO:0032561//guanyl ribonucleotide binding	GO:0043623//cellular protein complex assembly;GO:0009207;GO:0007017//microtubule-based process;GO:0043623//cellular protein complex assembly;GO:0009207;GO:0007017//microtubule-based process	gi|694414256|ref|XP_009335355.1|/0/PREDICTED: tubulin alpha chain-like [Pyrus x bretschneideri]
orange1.1t01672	orange1.1t01672.1	366.31	275.12	341.51	4972.33	375.21	412.52	421.02	554.72	449.73	399.87	307.68	289.73	711.23	634.91	611.73	512.53	584.61	494.33	gene=orange1.1t01672 CDS=1-459	K02920|1|5e-47|186|cic:CICLE_v10006222mg|large subunit ribosomal protein L36e	GO:0030529//intracellular ribonucleoprotein complex	GO:0005198//structural molecule activity	GO:0010467//gene expression	gi|641815110|gb|KDO38035.1|/5.02335e-47/hypothetical protein CISIN_1g037449mg [Citrus sinensis]
Cs3g21800	Cs3g21800.1	365.31	337.42	331.66	4972.33	363.64	414.54	390.55	392.74	379.43	453.12	417.47	348.18	437.8	411.44	427.02	373.03	365.32	371.24	gene=Cs3g21800 CDS=177-635	K02964|1|8e-72|271|cic:CICLE_v10002764mg|small subunit ribosomal protein S18e	GO:0031090//organelle membrane;GO:0015935//small ribosomal subunit;GO:0030312//external encapsulating structure;GO:0031981//nuclear lumen	GO:0003676//nucleic acid binding;GO:0005198//structural molecule activity	GO:0010467//gene expression	gi|641865124|gb|KDO83809.1|/4.6074e-71/hypothetical protein CISIN_1g031787mg [Citrus sinensis]
orange1.1t02044	orange1.1t02044.1	364.35	212.52	358.65	4972.33	310.77	340.07	260.04	583.06	491.96	282.3	298.06	375.67	630.9	587.73	405.85	297.29	341.95	308.7	gene=orange1.1t02044 CDS=148-1197	K00430|1|0.0|670|cit:102614803|peroxidase [EC:1.11.1.7]	-	-	-	gi|568879456|ref|XP_006492674.1|/0/PREDICTED: peroxidase C3-like isoform X1 [Citrus sinensis]
Cs1g19950	Cs1g19950.1,Cs1g19950.2,Cs1g19950.3	362.8	521.74	441.76	4972.33	444.99	406.83	241.47	327.51	287.93	337.66	320.82	345.65	286.61	258.03	305.72	350.85	339.57	381.27	gene=Cs1g19950 CDS=296-706	K11253|1|2e-65|249|pvu:PHAVU_001G253800g|histone H3	GO:0000785//chromatin;GO:0043231//intracellular membrane-bounded organelle;GO:0000785//chromatin;GO:0043231//intracellular membrane-bounded organelle;GO:0000785//chromatin;GO:0043231//intracellular membrane-bounded organelle	GO:0003676//nucleic acid binding;GO:0003676//nucleic acid binding;GO:0003676//nucleic acid binding	GO:0034728//nucleosome organization;GO:0034728//nucleosome organization;GO:0034728//nucleosome organization	gi|593801262|ref|XP_007163668.1|/1.21441e-64/hypothetical protein PHAVU_001G253800g [Phaseolus vulgaris]
Cs2g23520	Cs2g23520.1,Cs2g23520.2,Cs2g23520.3,Cs2g23520.4	362.4	371.27	344.92	4972.33	401.18	388.91	309.47	394.66	354.74	319.57	370.54	297.78	287.73	281.47	327.12	258.19	347.76	278.19	gene=Cs2g23520 CDS=59-1177	K05863|1|0.0|699|cic:CICLE_v10015260mg|solute carrier family 25 (mitochondrial adenine nucleotide translocator), member 4/5/6/31	GO:0019866//organelle inner membrane;GO:0031224//intrinsic component of membrane;GO:0019866//organelle inner membrane;GO:0031224//intrinsic component of membrane;GO:0019866//organelle inner membrane;GO:0031224//intrinsic component of membrane;GO:0019866//organelle inner membrane;GO:0031224//intrinsic component of membrane	-	GO:0006810//transport;GO:0006810//transport;GO:0006810//transport;GO:0006810//transport	gi|567909913|ref|XP_006447270.1|/0/hypothetical protein CICLE_v10015260mg [Citrus clementina]
orange1.1t03281	orange1.1t03281.1,orange1.1t03281.2	360.5	213.25	379.48	4972.33	341.72	350.69	950.53	367.82	628.92	644.71	300.25	417.21	449.63	495.69	316.83	711.01	433.14	837.61	gene=orange1.1t03281 CDS=84-953	K00927|1|2e-155|550|cic:CICLE_v10005101mg|phosphoglycerate kinase [EC:2.7.2.3]	GO:0044424;GO:0044424	GO:0016301//kinase activity;GO:0032559;GO:0016301//kinase activity	GO:0006796//phosphate-containing compound metabolic process;GO:0006007//glucose catabolic process;GO:0006796//phosphate-containing compound metabolic process;GO:0006007//glucose catabolic process	gi|567859134|ref|XP_006422250.1|/1.13184e-154/hypothetical protein CICLE_v10005101mg [Citrus clementina]
Cs8g09830	Cs8g09830.1	360.2	144.4	292.31	4972.33	192.48	394.05	26.03	180.18	158.02	73.46	73.06	191.55	113.25	73.84	91.78	91.11	46.56	70.09	gene=Cs8g09830 CDS=127-1314	K00660|1|0.0|758|cit:102616623|chalcone synthase [EC:2.3.1.74]	-	-	-	gi|568868379|ref|XP_006487477.1|/0/PREDICTED: chalcone synthase 2-like [Citrus sinensis]
Cs7g04030	Cs7g04030.1	358.87	240.01	344.11	4972.33	345.58	457.35	197.88	157.37	148.21	211.38	123.44	111.07	271.42	275.31	254.68	189.9	209.04	190.72	gene=Cs7g04030 CDS=150-743	K02997|1|3e-98|359|cic:CICLE_v10032800mg|small subunit ribosomal protein S9e	GO:0030529//intracellular ribonucleoprotein complex	GO:0003723//RNA binding;GO:0005198//structural molecule activity	GO:0010467//gene expression	gi|567892285|ref|XP_006438663.1|/1.52614e-97/hypothetical protein CICLE_v10032800mg [Citrus clementina]
orange1.1t02201	orange1.1t02201.1	358.19	233.41	338.31	4972.33	383.09	460.84	421.47	318	302.95	382.01	268.56	253.06	475.82	471.91	405.48	352.46	376.45	350.52	gene=orange1.1t02201 CDS=193-687	K02889|1|1e-94|347|cic:CICLE_v10012788mg|large subunit ribosomal protein L21e	GO:0043231//intracellular membrane-bounded organelle;GO:0030529//intracellular ribonucleoprotein complex	GO:0005198//structural molecule activity	GO:0010467//gene expression	gi|567874673|ref|XP_006429926.1|/5.40581e-94/hypothetical protein CICLE_v10012788mg [Citrus clementina]
Cs6g13025	Cs6g13025.1	356.27	262.75	328.55	4972.33	350.48	433.61	419.59	349.5	320.34	406.1	273.65	243.1	287.72	255.32	254.01	193.18	207.37	186.37	gene=Cs6g13025 CDS=268-413	K02979|1|3e-34|145|cic:CICLE_v10013157mg|small subunit ribosomal protein S28e	GO:0030529//intracellular ribonucleoprotein complex	GO:0005198//structural molecule activity	GO:0010467//gene expression	gi|567874751|ref|XP_006429965.1|/1.35267e-33/hypothetical protein CICLE_v10013157mg [Citrus clementina]
Cs6g02040	Cs6g02040.1	355.67	223.71	331.81	4972.33	357.87	416.2	550.54	526.79	488.24	586.16	477.88	468.04	515.44	518.49	475.72	407.57	494.13	420.13	gene=Cs6g02040 CDS=136-921	K02984|1|2e-131|469|cic:CICLE_v10012508mg|small subunit ribosomal protein S3Ae	GO:0030529//intracellular ribonucleoprotein complex	GO:0005198//structural molecule activity	GO:0010467//gene expression	gi|641812771|gb|KDO37446.1|/1.03514e-130/hypothetical protein CISIN_1g045491mg, partial [Citrus sinensis]
Cs1g05000	Cs1g05000.1,Cs1g05000.2,Cs1g05000.3	352.79	319.79	292.23	4972.33	359.86	366.24	389.98	293.56	318.87	273.5	255.63	235.29	228.47	262.41	251.66	239.14	292.35	283.23	gene=Cs1g05000 CDS=880-2013	K10355|1|0.0|759|tcc:TCM_001364|actin, other eukaryote	GO:0043232;GO:0043232;GO:0043232	GO:0032559;GO:0032559;GO:0032559	-	gi|590708352|ref|XP_007048253.1|/0/Actin 7 isoform 1 [Theobroma cacao]
Cs6g18830	Cs6g18830.1,Cs6g18830.2,Cs6g18830.3	352.13	341.44	347.9	4972.33	362.97	390.33	129.54	177.52	144.58	95.56	110.07	118.25	160.68	152.21	151.08	148.09	183.03	170.54	gene=Cs6g18830 CDS=177-968	K06630|1|2e-143|509|cic:CICLE_v10012495mg|14-3-3 protein epsilon	-	GO:0005515//protein binding;GO:0005515//protein binding;GO:0005515//protein binding	-	gi|567876417|ref|XP_006430798.1|/1.40556e-142/hypothetical protein CICLE_v10012495mg [Citrus clementina]
Cs6g05890	Cs6g05890.1	351.47	261.09	329.13	4972.33	413.83	445.79	206.85	319.85	226.15	115.29	159.24	174.93	425.3	458.04	525.65	268.58	494.15	464.13	gene=Cs6g05890 CDS=234-2177	K03283|1|0.0|1181|cic:CICLE_v10011260mg|heat shock 70kDa protein 1/8;K06758|1|0.0|1181|cic:CICLE_v10011260mg|L1 cell adhesion molecule like protein	-	GO:0016628//oxidoreductase activity, acting on the CH-CH group of donors, NAD or NADP as acceptor;GO:0032559	GO:0008152//metabolic process;GO:0050896//response to stimulus	gi|567872877|ref|XP_006429028.1|/0/hypothetical protein CICLE_v10011260mg [Citrus clementina]
orange1.1t01677	orange1.1t01677.1	350.65	369.48	339.98	4972.33	260.91	443.34	129.84	151.36	104.27	69.27	95.07	103.34	62.48	54.58	71.84	76.9	55.27	46.84	gene=orange1.1t01677 CDS=1-192	-	-	GO:0015002//heme-copper terminal oxidase activity	-	gi|568878728|ref|XP_006492338.1|/1.02176e-15/PREDICTED: probable cytochrome c oxidase subunit 5C-3-like [Citrus sinensis]
Cs6g16145	Cs6g16145.1	350.39	259.79	320.13	4972.33	343.26	438.44	172.88	246.7	179.89	80.87	97.23	140.81	278.85	263.24	257.87	237.82	267	187.07	gene=Cs6g16145 CDS=159-555	K02183|1|2e-80|299|sita:101770095|calmodulin	-	GO:0046872//metal ion binding	GO:0019932//second-messenger-mediated signaling;GO:0009640//photomorphogenesis;GO:0009593//detection of chemical stimulus	gi|698465314|ref|XP_009782645.1|/2.49877e-79/PREDICTED: calmodulin-7-like isoform X2 [Nicotiana sylvestris]
Cs6g15220	Cs6g15220.1,Cs6g15220.2	349.91	244.08	335.88	4972.33	381.59	478.93	169.37	150.58	127.65	149.18	109.05	106.62	233.49	215.08	196.22	175.38	165.46	194.49	gene=Cs6g15220 CDS=42-365	K08232|1|1e-115|293|cit:102612075|monodehydroascorbate reductase (NADH) [EC:1.6.5.4]	GO:0030529//intracellular ribonucleoprotein complex	GO:0016491//oxidoreductase activity;GO:0005198//structural molecule activity	GO:0006412//translation	gi|567875341|ref|XP_006430260.1|/6.41593e-34/hypothetical protein CICLE_v10013051mg [Citrus clementina]
Cs3g20140	Cs3g20140.1	348.62	363.16	400.4	4972.33	233.26	297.53	202.18	281.34	222.48	126.47	106.78	112.42	56.74	59.89	57.96	52.38	52.42	39.38	gene=Cs3g20140 CDS=1-933	K05933|1|2e-180|632|cit:102622142|aminocyclopropanecarboxylate oxidase [EC:1.14.17.4]	-	GO:0016641//oxidoreductase activity, acting on the CH-NH2 group of donors, oxygen as acceptor	GO:0008152//metabolic process	gi|568837670|ref|XP_006472846.1|/9.81507e-180/PREDICTED: 1-aminocyclopropane-1-carboxylate oxidase 5-like [Citrus sinensis]
Cs7g18560	Cs7g18560.1,Cs7g18560.2	346.58	400.07	552.53	4972.33	424.75	457.79	475.02	475.7	484.05	433.05	366.56	479.15	451.92	388.77	430.68	444.13	243.24	398.57	gene=Cs7g18560 CDS=466-978	K00799|1|1e-118|351|cit:102619530|glutathione S-transferase [EC:2.5.1.18]	-	GO:0016765//transferase activity, transferring alkyl or aryl (other than methyl) groups;GO:0016765//transferase activity, transferring alkyl or aryl (other than methyl) groups	-	gi|568863064|ref|XP_006484982.1|/8.17024e-118/PREDICTED: glutathione S-transferase F9-like [Citrus sinensis]
Cs8g05410	Cs8g05410.1,Cs8g05410.2	345.69	343.59	311.63	4972.33	283.06	372.52	29.41	163.98	123.21	31.05	64.04	83.82	253.53	242.47	225.14	168.97	230.71	166.35	gene=Cs8g05410 CDS=611-1174	K00588|1|6e-135|382|cit:102619432|caffeoyl-CoA O-methyltransferase [EC:2.1.1.104]	-	GO:0008171//O-methyltransferase activity;GO:0043169//cation binding;GO:0008171//O-methyltransferase activity;GO:0043169//cation binding	GO:0006730//one-carbon metabolic process;GO:0009699//phenylpropanoid biosynthetic process;GO:0006730//one-carbon metabolic process;GO:0009699//phenylpropanoid biosynthetic process	gi|568867439|ref|XP_006487045.1|/3.42215e-134/PREDICTED: caffeoyl-CoA O-methyltransferase-like [Citrus sinensis]
Cs8g09090	Cs8g09090.1	345.67	121.34	466.94	4972.33	263.51	301.2	1174.27	465.05	906.83	2333.63	980.14	1109.09	282.68	228.71	208.64	986.7	341.59	987.84	gene=Cs8g09090 CDS=441-1025	-	-	-	-	gi|568868224|ref|XP_006487412.1|/1.72054e-80/PREDICTED: proline-rich protein 4-like [Citrus sinensis]
Cs5g23650	Cs5g23650.1	344.26	262.15	330.06	4972.33	350.6	444.35	168.52	151.09	129.34	140.13	97.86	102.94	159.31	139.58	135.35	128.3	122.35	113.01	gene=Cs5g23650 CDS=123-440	K02929|1|3e-58|226|tcc:TCM_007734|large subunit ribosomal protein L44e	GO:0030529//intracellular ribonucleoprotein complex	GO:0005198//structural molecule activity	GO:0010467//gene expression	gi|297736252|emb|CBI24890.3|/2.14473e-58/unnamed protein product [Vitis vinifera]
Cs8g14960	Cs8g14960.1	343.82	388.01	357.18	4972.33	247.85	304.05	75.68	141.08	105.53	81.67	78.88	128.01	153.13	134.38	83.14	78.06	68.55	68.96	gene=Cs8g14960 CDS=197-649	K02639|1|5e-82|305|cit:102608949|ferredoxin	-	GO:0051536//iron-sulfur cluster binding;GO:0043169//cation binding	GO:0006091//generation of precursor metabolites and energy	gi|568869455|ref|XP_006487938.1|/2.90538e-81/PREDICTED: ferredoxin-3, chloroplastic-like [Citrus sinensis]
Cs9g03800	Cs9g03800.1,Cs9g03800.2,Cs9g03800.3	343.29	244.67	323.7	4972.33	339.68	421.56	284.83	236.42	223.91	294.46	210.32	189.55	265.09	250.8	243.6	190.28	216.17	178.22	gene=Cs9g03800 CDS=181-774	K02885|1|3e-87|323|cit:102627110|large subunit ribosomal protein L19e	GO:0030529//intracellular ribonucleoprotein complex;GO:0030529//intracellular ribonucleoprotein complex	GO:0005198//structural molecule activity;GO:0005198//structural molecule activity	GO:0010467//gene expression;GO:0010467//gene expression	gi|567852665|ref|XP_006419496.1|/1.64122e-90/hypothetical protein CICLE_v10005909mg [Citrus clementina]
orange1.1t01074	orange1.1t01074.1	342.49	244.4	329.63	4972.33	383.46	432.41	426.11	236.89	264.21	300.96	211.23	202.17	390.67	340.21	344.28	302.3	300.19	304.8	gene=orange1.1t01074 CDS=594-938	K02981|1|2e-112|339|cic:CICLE_v10005613mg|small subunit ribosomal protein S2e	GO:0030529//intracellular ribonucleoprotein complex	GO:0003676//nucleic acid binding;GO:0005198//structural molecule activity	GO:0010467//gene expression	gi|567857466|ref|XP_006421416.1|/1.0901e-111/hypothetical protein CICLE_v10005613mg [Citrus clementina]
Cs6g15300	Cs6g15300.1,Cs6g15300.2,Cs6g15300.3,Cs6g15300.4,Cs6g15300.5	340.4	356.22	309.99	4972.33	359.28	304.95	114.11	216.95	184.87	78.98	248.72	217.91	94.07	89.03	108.57	167.25	146.4	148.64	gene=Cs6g15300 CDS=1470-4847	K05681|1|4e-43|177|cme:CYME_CMS467C|ATP-binding cassette, subfamily G (WHITE), member 2	-	-	-	gi|641842161|gb|KDO61069.1|/0/hypothetical protein CISIN_1g000615mg [Citrus sinensis]
Cs9g05330	Cs9g05330.1	340.05	73.24	387.96	4972.33	348.13	561.54	47.06	307.77	130.08	68.91	102.5	246.56	97.12	53.39	81.71	81.1	130.13	72.47	gene=Cs9g05330 CDS=104-583	K02553|1|2e-15|83.2|bvg:104906773|regulator of ribonuclease activity A	-	-	-	gi|567853159|ref|XP_006419743.1|/1.48038e-87/hypothetical protein CICLE_v10006108mg [Citrus clementina]
Cs9g13070	Cs9g13070.1	339.59	334.2	326.67	4972.33	337.29	330.47	280.09	365.72	324.78	356.01	309.74	330.73	398.58	401.3	385	400.68	394	369.48	gene=Cs9g13070 CDS=1-717	K01522|1|3e-112|404|cit:102609440|bis(5'-adenosyl)-triphosphatase [EC:3.6.1.29]	-	-	-	gi|568873692|ref|XP_006489964.1|/1.39775e-111/PREDICTED: bis(5'-adenosyl)-triphosphatase-like [Citrus sinensis]
orange1.1t00469	orange1.1t00469.1	339.46	281.96	339.98	4972.33	310.06	453.51	123.43	167.25	156.74	133.86	148.33	160.76	256.99	239.32	197.29	249.82	289.01	237.06	gene=orange1.1t00469 CDS=1-153	-	-	-	-	gi|720000134|ref|XP_010255931.1|/5.44019e-12/PREDICTED: uncharacterized protein LOC104596457 isoform X1 [Nelumbo nucifera]
Cs6g09140	Cs6g09140.1,Cs6g09140.2	338.49	249.73	328.58	4972.33	326.28	413.85	386.35	399.14	333.88	382.46	324.22	292.87	397.28	400.22	375.6	340.8	365.43	363.31	gene=Cs6g09140 CDS=142-930	K02987|1|7e-146|517|cic:CICLE_v10012499mg|small subunit ribosomal protein S4e	GO:0030529//intracellular ribonucleoprotein complex;GO:0030529//intracellular ribonucleoprotein complex	GO:0003676//nucleic acid binding;GO:0005198//structural molecule activity;GO:0003676//nucleic acid binding;GO:0005198//structural molecule activity	GO:0010467//gene expression;GO:0010467//gene expression	gi|567873775|ref|XP_006429477.1|/4.13974e-145/hypothetical protein CICLE_v10012499mg [Citrus clementina]
Cs8g18560	Cs8g18560.1,Cs8g18560.2	337.68	275.6	316.87	4972.33	331.88	376.3	174.27	179.69	173.55	157.89	129.4	167.93	185.21	154.27	155.44	150.14	173.64	145.83	gene=Cs8g18560 CDS=194-955	K01803|1|3e-126|452|cic:CICLE_v10029115mg|triosephosphate isomerase (TIM) [EC:5.3.1.1]	-	GO:0016861//intramolecular oxidoreductase activity, interconverting aldoses and ketoses;GO:0016747//transferase activity, transferring acyl groups other than amino-acyl groups;GO:0016861//intramolecular oxidoreductase activity, interconverting aldoses and ketoses;GO:0016747//transferase activity, transferring acyl groups other than amino-acyl groups	-	gi|567864372|ref|XP_006424835.1|/2.24025e-120/hypothetical protein CICLE_v10029115mg [Citrus clementina]
Cs2g01760	Cs2g01760.1,Cs2g01760.2	337.66	318.31	302.38	4972.33	330.9	328.55	317.55	381.07	481.99	587.38	551.16	448.38	414.33	414.91	381.27	414.3	345.28	513.69	gene=Cs2g01760 CDS=344-1087	-	-	-	-	gi|568825829|ref|XP_006467280.1|/7.66733e-68/PREDICTED: neurofilament heavy polypeptide-like [Citrus sinensis]
Cs1g03150	Cs1g03150.1	337.54	202.54	255.54	4972.33	194.54	418.08	17.11	123.27	109.08	44.38	65.01	143.12	142.34	87.21	88.26	86.13	57.55	63.57	gene=Cs1g03150 CDS=1-528	-	-	-	-	gi|567905902|ref|XP_006445439.1|/5.1428e-64/hypothetical protein CICLE_v10022525mg [Citrus clementina]
Cs9g04440	Cs9g04440.1	337.49	243	281.35	4972.33	296.41	379.65	23.97	93.44	70.43	44.81	87.65	117.22	179.89	154.65	134.28	120.15	123.51	106.57	gene=Cs9g04440 CDS=1-396	-	GO:0005576//extracellular region;GO:0005618//cell wall	-	GO:0007154//cell communication;GO:0023052//signaling	gi|567852841|ref|XP_006419584.1|/8.64077e-47/hypothetical protein CICLE_v10006201mg [Citrus clementina]
Cs6g16140	Cs6g16140.1	336.63	339.01	350.71	4972.33	344.18	361.83	259.61	283.27	236.7	201.55	231.46	247.49	272.52	261.43	284.86	278.05	294.84	283.02	gene=Cs6g16140 CDS=153-602	K02183|1|4e-80|299|pper:PRUPE_ppa012070mg|calmodulin	-	GO:0046872//metal ion binding	GO:0019932//second-messenger-mediated signaling;GO:0009640//photomorphogenesis;GO:0009593//detection of chemical stimulus	gi|565474928|ref|XP_006295105.1|/2.0238e-79/hypothetical protein CARUB_v10024180mg [Capsella rubella]
orange1.1t01197	orange1.1t01197.1,orange1.1t01197.2,orange1.1t01197.3	335.58	214.08	321.61	4972.33	324.07	401.37	212.36	251.26	214.41	244.73	167.34	193.95	314.69	276.11	236.82	220.1	253.84	229.16	gene=orange1.1t01197 CDS=188-676	K02976|1|5e-29|129|cit:102612329|small subunit ribosomal protein S26e	-	-	-	gi|567878887|ref|XP_006432002.1|/1.95624e-41/hypothetical protein CICLE_v10002735mg [Citrus clementina]
Cs5g04540	Cs5g04540.1	335.02	540.16	454.48	4972.33	448.12	781.95	75.03	304.26	193.42	120.21	203.23	370.83	449.72	349.76	374.08	483.61	342	563.42	gene=Cs5g04540 CDS=67-738	K11426|1|8e-34|144|sly:101250545|SET and MYND domain-containing protein;K19476|3|2e-13|76.6|mdm:103418875|vacuolar protein sorting-associated protein IST1	-	-	-	gi|567894398|ref|XP_006439687.1|/5.90696e-112/hypothetical protein CICLE_v10022128mg [Citrus clementina]
Cs7g01470	Cs7g01470.1,Cs7g01470.2,Cs7g01470.3	334.57	205.91	284.51	4972.33	309.47	392.94	281.96	298.22	268.94	309.06	232.91	223.5	365.99	357.26	287.53	234.98	264.65	225.54	gene=Cs7g01470 CDS=175-729	K02934|1|5e-115|334|cit:102608733|large subunit ribosomal protein L6e	GO:0005622//intracellular;GO:0030529//intracellular ribonucleoprotein complex	GO:0005198//structural molecule activity	GO:0010467//gene expression	gi|568858617|ref|XP_006482844.1|/1.05592e-100/PREDICTED: 60S ribosomal protein L6-like [Citrus sinensis]
Cs6g21260	Cs6g21260.1	334.11	81.08	318.44	4972.33	337.95	480.29	19.54	117.92	70.87	26.1	31.22	69.15	184.14	183.64	152.17	144.32	119.76	156.28	gene=Cs6g21260 CDS=1-324	-	-	-	-	gi|568858103|ref|XP_006482595.1|/2.628e-43/PREDICTED: gibberellin-regulated protein 4-like [Citrus sinensis]
Cs5g08020	Cs5g08020.1,Cs5g08020.2,Cs5g08020.3	334.05	256.18	300.63	4972.33	337.56	347.4	355.81	243.94	240.61	295.32	238.28	208.23	282.27	292.72	276.67	231.32	264.85	258.87	gene=Cs5g08020 CDS=394-1422	K13199|1|5e-75|283|cit:102609479|plasminogen activator inhibitor 1 RNA-binding protein	-	-	-	gi|641838147|gb|KDO57094.1|/3.80078e-78/hypothetical protein CISIN_1g017915mg [Citrus sinensis]
Cs3g21530	Cs3g21530.1,Cs3g21530.2,Cs3g21530.3	333.28	300.26	262.79	4972.33	270.37	298.09	70.34	117.87	115.84	26.13	45.8	59.96	89.67	102.27	104.47	45.25	85.42	41.86	gene=Cs3g21530 CDS=229-2706	K10999|1|0.0|1532|cit:102619086|cellulose synthase A [EC:2.4.1.12]	GO:0031224//intrinsic component of membrane;GO:0031224//intrinsic component of membrane;GO:0031224//intrinsic component of membrane	GO:0016759//cellulose synthase activity;GO:0046914//transition metal ion binding;GO:0016759//cellulose synthase activity;GO:0046914//transition metal ion binding;GO:0016759//cellulose synthase activity;GO:0046914//transition metal ion binding	GO:0045229//external encapsulating structure organization;GO:0009250//glucan biosynthetic process;GO:0045229//external encapsulating structure organization;GO:0009250//glucan biosynthetic process;GO:0045229//external encapsulating structure organization;GO:0009250//glucan biosynthetic process	gi|641865076|gb|KDO83761.1|/0/hypothetical protein CISIN_1g001373mg [Citrus sinensis]
Cs2g29650	Cs2g29650.1	333.25	291.44	263.44	4972.33	334.68	403.24	22.1	82.33	119.72	46.37	69.59	117.94	255.05	276.29	342.11	299.12	374.15	411.95	gene=Cs2g29650 CDS=88-504	-	-	-	-	gi|567907941|ref|XP_006446284.1|/1.68577e-50/hypothetical protein CICLE_v10017108mg [Citrus clementina]
Cs6g04450	Cs6g04450.1,Cs6g04450.2,Cs6g04450.3	333.13	426.96	377.3	4972.33	424.61	364.3	172.56	327.74	185.77	301.45	404.68	305.09	484.23	381.66	366.21	229.11	308.93	318	gene=Cs6g04450 CDS=182-1558	K08770|1|0.0|884|cit:102609575|ubiquitin C	GO:0043231//intracellular membrane-bounded organelle;GO:0031410//cytoplasmic vesicle;GO:0043231//intracellular membrane-bounded organelle;GO:0031410//cytoplasmic vesicle;GO:0043231//intracellular membrane-bounded organelle	-	GO:0019941//modification-dependent protein catabolic process;GO:0016567//protein ubiquitination;GO:0019941//modification-dependent protein catabolic process;GO:0016567//protein ubiquitination	gi|357474763|ref|XP_003607667.1|/0/Multidrug resistance protein ABC transporter family [Medicago truncatula]
Cs3g24820	Cs3g24820.1	332.11	343.07	264.41	4972.33	254.52	213.58	55.35	158.17	100.24	39.14	90.94	121.06	280.28	259.21	398.18	160.47	299.8	125.18	gene=Cs3g24820 CDS=34-321	-	-	-	-	gi|568850939|ref|XP_006479153.1|/1.66122e-15/PREDICTED: glutamic acid-rich protein-like [Citrus sinensis]
Cs4g11100	Cs4g11100.1,Cs4g11100.2	330.88	457.55	366.18	4972.33	537.03	468.02	717.12	435.97	502.42	828.73	642.02	497.97	280.86	271.99	341.83	333.72	261.73	365.62	gene=Cs4g11100 CDS=278-625	K03113|1|8e-52|204|cit:102626880|translation initiation factor 1	-	GO:0008135//translation factor activity, RNA binding;GO:0008135//translation factor activity, RNA binding	GO:0006412//translation;GO:0006412//translation	gi|568842543|ref|XP_006475205.1|/3.99975e-51/PREDICTED: protein translation factor SUI1 homolog 2-like isoform X2 [Citrus sinensis]
Cs7g19400	Cs7g19400.1,Cs7g19400.2,Cs7g19400.3	329.91	173.65	271.13	4972.33	272.41	362.05	155.67	186.49	150.32	140.36	113.12	141.53	214.81	234.21	220.58	212.37	301.37	300.98	gene=Cs7g19400 CDS=146-1450	K08054|1|0.0|736|cit:102617406|calnexin	GO:0043231//intracellular membrane-bounded organelle;GO:0043231//intracellular membrane-bounded organelle;GO:0043231//intracellular membrane-bounded organelle	GO:0046872//metal ion binding;GO:0005515//protein binding;GO:0046872//metal ion binding;GO:0005515//protein binding;GO:0046872//metal ion binding;GO:0005515//protein binding	GO:0044267//cellular protein metabolic process;GO:0044267//cellular protein metabolic process;GO:0044267//cellular protein metabolic process	gi|568863229|ref|XP_006485059.1|/0/PREDICTED: calnexin homolog [Citrus sinensis]
orange1.1t00168	orange1.1t00168.1,orange1.1t00168.2	329.36	306.99	351.29	4972.33	393.8	381.46	335.2	275.78	252.8	338.19	264.54	237.54	361.79	372.61	361.57	310.21	317.49	343.14	gene=orange1.1t00168 CDS=480-1061	K02985|1|1e-123|444|cic:CICLE_v10009346mg|small subunit ribosomal protein S3e	GO:0030529//intracellular ribonucleoprotein complex;GO:0030529//intracellular ribonucleoprotein complex	GO:0003676//nucleic acid binding;GO:0005198//structural molecule activity;GO:0003676//nucleic acid binding;GO:0005198//structural molecule activity	GO:0010467//gene expression;GO:0010467//gene expression	gi|567919112|ref|XP_006451562.1|/2.82076e-128/hypothetical protein CICLE_v10009346mg [Citrus clementina]
Cs1g21450	Cs1g21450.1	328.18	223.01	264.26	4972.33	300.84	373.37	231.77	243.11	223.51	342.4	205.23	213.18	279.64	287.68	228.19	182.42	212.5	177.02	gene=Cs1g21450 CDS=337-777	K02898|1|2e-58|226|cic:CICLE_v10026719mg|large subunit ribosomal protein L26e	GO:0030529//intracellular ribonucleoprotein complex	GO:0005198//structural molecule activity	GO:0010467//gene expression	gi|567867007|ref|XP_006426126.1|/1.29895e-57/hypothetical protein CICLE_v10026719mg [Citrus clementina]
Cs5g22920	Cs5g22920.1,Cs5g22920.2,Cs5g22920.3	327.04	307.42	336.59	4972.33	305.72	311.17	100.72	161.87	166.02	154.36	74.03	148.84	135.14	150.68	116.29	157.9	152.54	178.88	gene=Cs5g22920 CDS=242-1183	K00847|1|1e-134|480|cic:CICLE_v10021105mg|fructokinase [EC:2.7.1.4]	-	GO:0004396//hexokinase activity;GO:0004396//hexokinase activity;GO:0004396//hexokinase activity	GO:0006796//phosphate-containing compound metabolic process;GO:0019321;GO:0006796//phosphate-containing compound metabolic process;GO:0019321;GO:0006796//phosphate-containing compound metabolic process;GO:0019321	gi|567901036|ref|XP_006443006.1|/5.5699e-134/hypothetical protein CICLE_v10021105mg [Citrus clementina]
Cs2g22020	Cs2g22020.1	325.24	88.85	219.26	4972.33	200.44	375.52	5.44	123.32	136.18	15.71	43.27	182.9	154.34	98.39	126.06	104.73	143.81	103.69	gene=Cs2g22020 CDS=208-933	-	-	GO:0046914//transition metal ion binding	-	gi|568830919|ref|XP_006469730.1|/1.18563e-64/PREDICTED: early nodulin-20-like [Citrus sinensis]
Cs3g21510	Cs3g21510.1	324.98	723.9	370.11	4972.33	393.68	253.26	687.49	1193.15	873.85	505.57	753.98	540.71	1241.17	1639.42	1763.09	1377.1	1422.87	1049.61	gene=Cs3g21510 CDS=78-554	-	-	-	-	gi|568838139|ref|XP_006473073.1|/2.06043e-39/PREDICTED: abscisic stress-ripening protein 1-like [Citrus sinensis]
Cs7g19440	Cs7g19440.1,Cs7g19440.2,Cs7g19440.3	324.2	406.6	343.34	4972.33	349.08	289.68	258.17	395.2	282.5	240.89	286.19	332.8	401.11	369.17	361.05	496.29	309.75	357.83	gene=Cs7g19440 CDS=242-1630	-	-	-	-	gi|568863237|ref|XP_006485063.1|/0/PREDICTED: uncharacterized protein LOC102618549 [Citrus sinensis]
Cs2g04015	Cs2g04015.1	323.27	170.64	266.13	4972.33	292.06	368.91	150.19	176.19	106.96	72.58	61.25	71.32	157.15	175.06	124.77	84.13	127.49	83.04	gene=Cs2g04015 CDS=138-494	K02912|1|5e-60|230|cic:CICLE_v10017148mg|large subunit ribosomal protein L32e	GO:0030529//intracellular ribonucleoprotein complex	GO:0005198//structural molecule activity	GO:0010467//gene expression	gi|568826378|ref|XP_006467550.1|/2.29725e-59/PREDICTED: 60S ribosomal protein L32-1-like [Citrus sinensis]
Cs3g18360	Cs3g18360.1	322.02	287.33	287.9	4972.33	310.36	313.8	372.58	384.79	367.91	304.17	265.44	297.79	592.77	599.18	587.44	529.19	528.95	530.67	gene=Cs3g18360 CDS=425-1375	K17095|1|2e-134|480|gmx:100815639|annexin A7/11	-	GO:0005543//phospholipid binding;GO:0046872//metal ion binding	-	gi|567882883|ref|XP_006434000.1|/9.11367e-177/hypothetical protein CICLE_v10001888mg [Citrus clementina]
Cs6g10960	Cs6g10960.1	321.38	350.12	309.94	4972.33	331.17	340.08	228.23	345.19	344.91	442.5	387.07	405.92	322.47	306.76	285.62	290.82	335.32	325.32	gene=Cs6g10960 CDS=136-696	-	-	-	-	gi|567874261|ref|XP_006429720.1|/3.1686e-96/hypothetical protein CICLE_v10012875mg [Citrus clementina]
Cs8g10300	Cs8g10300.1	321.02	359.84	352.35	4972.33	179.1	472.54	28.36	235.74	231.8	41.05	128.19	326.62	266.13	199.07	175.36	153.97	108.05	122.89	gene=Cs8g10300 CDS=70-417	-	-	-	-	gi|567862222|ref|XP_006423765.1|/3.09868e-11/hypothetical protein CICLE_v100279792mg, partial [Citrus clementina]
Cs5g02640	Cs5g02640.1,Cs5g02640.2,Cs5g02640.3,Cs5g02640.4	320.86	387.93	292.45	4972.33	352.04	293.32	279.36	290.54	322.7	378.53	404.14	326.53	234.01	224.53	218.07	275.75	261.59	258.44	gene=Cs5g02640 CDS=70-447	K06689|1|1e-35|149|smo:SELMODRAFT_228916|ubiquitin-conjugating enzyme E2 D/E [EC:2.3.2.23]	-	GO:0016879//ligase activity, forming carbon-nitrogen bonds;GO:0032559;GO:0016879//ligase activity, forming carbon-nitrogen bonds;GO:0032559;GO:0016879//ligase activity, forming carbon-nitrogen bonds;GO:0032559;GO:0019787//ubiquitin-like protein transferase activity;GO:0032559	GO:0006464//cellular protein modification process;GO:0006464//cellular protein modification process;GO:0006464//cellular protein modification process;GO:0032446//protein modification by small protein conjugation	gi|567893846|ref|XP_006439411.1|/4.21322e-72/hypothetical protein CICLE_v10022710mg [Citrus clementina]
Cs1g21050	Cs1g21050.1	320	202.25	280.71	4972.33	345.98	397.31	165.41	194.75	167.1	160.95	104.75	136.96	179.21	199.59	165.22	122.86	210.48	139.64	gene=Cs1g21050 CDS=298-1653	K07374|1|0.0|840|cic:CICLE_v10025588mg|tubulin alpha	GO:0032991//macromolecular complex;GO:0015630//microtubule cytoskeleton	GO:0017111//nucleoside-triphosphatase activity;GO:0032561//guanyl ribonucleotide binding	GO:0043623//cellular protein complex assembly;GO:0009207;GO:0007017//microtubule-based process	gi|568823999|ref|XP_006466394.1|/0/PREDICTED: tubulin alpha-3 chain-like isoform X1 [Citrus sinensis]
orange1.1t00032	orange1.1t00032.1	319.59	198.75	266.56	4972.33	297.46	365.36	194.63	222.59	185.56	232.41	159.65	148.51	281.03	300.49	230.85	182.35	205.99	164.51	gene=orange1.1t00032 CDS=236-1219	K14753|1|1e-177|623|cic:CICLE_v10008909mg|guanine nucleotide-binding protein subunit beta-2-like 1 protein	-	GO:0004871//signal transducer activity;GO:0004683//calmodulin-dependent protein kinase activity	GO:0006796//phosphate-containing compound metabolic process	gi|567919326|ref|XP_006451669.1|/6.64535e-177/hypothetical protein CICLE_v10008909mg [Citrus clementina]
Cs8g18010	Cs8g18010.1	318.52	361.65	333.88	4972.33	318.78	357.35	140.07	183.57	162.95	151.91	123.24	117.01	175.42	173.85	176.59	199.57	190.18	171.41	gene=Cs8g18010 CDS=102-542	K11252|1|5e-54|212|cic:CICLE_v10029263mg|histone H2B	GO:0000785//chromatin;GO:0043231//intracellular membrane-bounded organelle	GO:0003676//nucleic acid binding	GO:0034728//nucleosome organization	gi|567864228|ref|XP_006424763.1|/2.85218e-53/hypothetical protein CICLE_v10029263mg [Citrus clementina]
orange1.1t05982	orange1.1t05982.1	316.91	346	329.54	4972.33	350.09	436.17	287.43	343.98	317.94	269.6	209.05	314.15	151.4	142.96	116.52	121.88	135.05	95.64	gene=orange1.1t05982 CDS=91-250	-	-	-	-	gi|568880265|ref|XP_006493051.1|/2.56762e-06/PREDICTED: putative SERF-like protein-like [Citrus sinensis]
orange1.1t01576	orange1.1t01576.1	316.91	104.79	287.42	4972.33	211.14	286.7	413.96	367.53	516.15	669.9	254.84	436.99	955.47	1072.75	773.8	691.87	615.44	718.14	gene=orange1.1t01576 CDS=124-435	-	-	-	-	gi|568878518|ref|XP_006492236.1|/1.81959e-46/PREDICTED: putative lipid-transfer protein DIR1-like [Citrus sinensis]
Cs1g19840	Cs1g19840.1	316.59	391.99	328.11	4972.33	392.03	392.65	379.81	338.95	351.15	419.73	354.16	316.57	197.13	182.34	223.27	228.01	195.75	204.05	gene=Cs1g19840 CDS=1-714	K14396|1|3e-82|305|cit:102620020|polyadenylate-binding protein 2	-	GO:0005488	-	gi|641841805|gb|KDO60716.1|/1.06568e-95/hypothetical protein CISIN_1g041633mg [Citrus sinensis]
orange1.1t02752	orange1.1t02752.1	315.26	198.11	275.56	4972.33	278.94	388.47	208.24	195.76	167.97	219.53	143.56	146	157.16	155.16	134.83	113.98	146.54	105.48	gene=orange1.1t02752 CDS=179-604	K02951|1|7e-67|254|cic:CICLE_v10026727mg|small subunit ribosomal protein S12e	GO:0030529//intracellular ribonucleoprotein complex	GO:0005198//structural molecule activity	GO:0010467//gene expression	gi|568880921|ref|XP_006493344.1|/3.74416e-66/PREDICTED: 40S ribosomal protein S12-like isoform X1 [Citrus sinensis]
Cs9g19200	Cs9g19200.1	314.26	196.32	327.39	4972.33	277.9	353.73	447.35	486.37	405.16	473.34	349.43	331.33	479.71	540.96	484.45	406.74	453.35	418.28	gene=Cs9g19200 CDS=1-540	K02947|1|3e-53|207|cic:CICLE_v10006024mg|small subunit ribosomal protein S10e;K09422|3|2e-51|201|gmx:100797787|myb proto-oncogene protein, plant	-	-	-	gi|641837851|gb|KDO56800.1|/1.70637e-52/hypothetical protein CISIN_1g029742mg [Citrus sinensis]
orange1.1t00609	orange1.1t00609.1,orange1.1t00609.2	313.13	397.41	313.29	4972.33	340.47	321.9	160.35	308.69	220.34	108.14	249.53	237.67	189.03	170.89	221.47	195.71	288.95	201.68	gene=orange1.1t00609 CDS=187-1089	K01363|1|0.0|585|cic:CICLE_v10020859mg|cathepsin B [EC:3.4.22.1]	-	GO:0004175//endopeptidase activity;GO:0004175//endopeptidase activity	GO:0019222//regulation of metabolic process;GO:0019538//protein metabolic process;GO:0019222//regulation of metabolic process;GO:0019538//protein metabolic process	gi|567904350|ref|XP_006444663.1|/0/hypothetical protein CICLE_v10020859mg [Citrus clementina]
Cs4g20130	Cs4g20130.1,Cs4g20130.2,Cs4g20130.3,Cs4g20130.4,Cs4g20130.5,Cs4g20130.6,Cs4g20130.7,Cs4g20130.8	312.63	436.83	438.46	4972.33	466.77	311.78	421.48	357.35	327.7	487.04	559.09	394.61	255.17	308.05	326.22	314.18	232.49	359.38	gene=Cs4g20130 CDS=3181-4104	K10144|1|0.0|654|cit:102624116|RING finger and CHY zinc finger domain-containing protein 1 [EC:2.3.2.27]	-	GO:0046914//transition metal ion binding;GO:0046914//transition metal ion binding;GO:0046914//transition metal ion binding;GO:0046914//transition metal ion binding;GO:0046872//metal ion binding;GO:0046872//metal ion binding;GO:0046914//transition metal ion binding;GO:0046872//metal ion binding	-	gi|641860982|gb|KDO79670.1|/0/hypothetical protein CISIN_1g021012mg [Citrus sinensis]
Cs6g08855	Cs6g08855.1	312.49	219.08	307.76	4972.33	349.12	417.64	207.94	203.47	178.96	225.14	175.77	180.82	158.47	146.83	123.63	107.43	154.83	97.48	gene=Cs6g08855 CDS=191-320	-	-	-	-	-
Cs4g03700	Cs4g03700.1,Cs4g03700.2,Cs4g03700.3,Cs4g03700.4	311.69	315.15	327.28	4972.33	287.11	267.57	128.45	164.58	128.78	77.67	81.89	71.58	121.33	136.63	106.51	73.07	75.18	66.83	gene=Cs4g03700 CDS=274-2931	K01535|1|0.0|1571|cit:102616096|H+-transporting ATPase [EC:3.6.3.6]	GO:0031224//intrinsic component of membrane;GO:0031224//intrinsic component of membrane;GO:0031224//intrinsic component of membrane;GO:0031224//intrinsic component of membrane	GO:0015662//ATPase activity, coupled to transmembrane movement of ions, phosphorylative mechanism;GO:0032559;GO:0015662//ATPase activity, coupled to transmembrane movement of ions, phosphorylative mechanism;GO:0032559;GO:0015662//ATPase activity, coupled to transmembrane movement of ions, phosphorylative mechanism;GO:0032559;GO:0015662//ATPase activity, coupled to transmembrane movement of ions, …	GO:0009206;GO:0006811//ion transport;GO:0009207;GO:0009206;GO:0006811//ion transport;GO:0009207;GO:0009206;GO:0006811//ion transport;GO:0009207;GO:0009206;GO:0006811//ion transport;GO:0009207	gi|567922636|ref|XP_006453324.1|/0/hypothetical protein CICLE_v10007368mg [Citrus clementina]
Cs7g10860	Cs7g10860.1	310.15	237.37	282.74	4972.33	279.61	345.52	105.26	131.09	108.79	153.53	121.27	134.16	191.79	165.62	142.33	186.2	138.89	181.64	gene=Cs7g10860 CDS=52-798	K13123|1|2e-34|146|cic:CICLE_v10018692mg|G patch domain-containing protein 1	-	-	-	gi|641846682|gb|KDO65564.1|/8.31537e-34/hypothetical protein CISIN_1g001970mg [Citrus sinensis]
Cs2g13410	Cs2g13410.1	309.76	253.76	281.67	4972.33	304.77	317.01	205.68	223.96	196.1	160.06	144.71	165.83	168.17	168.77	138.52	117.82	141.28	98.8	gene=Cs2g13410 CDS=191-1378	K01623|1|0.0|784|cit:102617338|fructose-bisphosphate aldolase, class I [EC:4.1.2.13]	-	GO:0016832//aldehyde-lyase activity	GO:0006007//glucose catabolic process	gi|568828917|ref|XP_006468780.1|/0/PREDICTED: probable fructose-bisphosphate aldolase 3, chloroplastic-like [Citrus sinensis]
Cs1g17970	Cs1g17970.1	309.65	267.19	277.27	4972.33	351.53	333.05	537.88	410.65	454.57	477.17	448.33	344.52	384.05	421.49	480.28	383.5	378.77	400.51	gene=Cs1g17970 CDS=420-1670	K03257|1|0.0|706|cic:CICLE_v10025724mg|translation initiation factor 4A	-	GO:0032559;GO:0042623//ATPase activity, coupled	-	gi|567867929|ref|XP_006426587.1|/0/hypothetical protein CICLE_v10025724mg [Citrus clementina]
Cs6g05950	Cs6g05950.1	308.38	216.93	286.8	4972.33	271.54	351.54	67.64	136.27	116.07	67.27	70.35	121.78	134.33	104.15	99.81	95.83	119.18	82.22	gene=Cs6g05950 CDS=65-232	K02902|1|6e-19|92.8|zma:101027259|large subunit ribosomal protein L28	-	-	-	gi|225440308|ref|XP_002262887.1|/2.43184e-25/PREDICTED: uncharacterized protein LOC100258053 [Vitis vinifera]
orange1.1t02385	orange1.1t02385.1	308.12	81.89	171.99	4972.33	208.82	299.77	39.07	100.95	158.59	41.49	102.57	375.01	146.24	101.05	107.43	141.73	228.08	147.28	gene=orange1.1t02385 CDS=238-1104	K08235|1|1e-154|546|cit:102621846|xyloglucan:xyloglucosyl transferase [EC:2.4.1.207]	GO:0005576//extracellular region;GO:0030312//external encapsulating structure	GO:0016798//hydrolase activity, acting on glycosyl bonds;GO:0016758//transferase activity, transferring hexosyl groups	GO:0044042//glucan metabolic process	gi|568880150|ref|XP_006492997.1|/7.76491e-154/PREDICTED: brassinosteroid-regulated protein BRU1-like [Citrus sinensis]
Cs4g16140	Cs4g16140.1	307.24	285.74	263.73	4972.33	345.1	330.93	251.07	287.26	260.93	290.15	261.47	260.49	412.51	392.12	336.26	372.43	392.27	379.98	gene=Cs4g16140 CDS=107-595	K03386|1|8e-71|267|ath:AT1G60740|peroxiredoxin (alkyl hydroperoxide reductase subunit C) [EC:1.11.1.15];K11187|2|1e-25|117|csl:COCSUDRAFT_52624|peroxiredoxin 5, atypical 2-Cys peroxiredoxin [EC:1.11.1.15]	-	GO:0016705//oxidoreductase activity, acting on paired donors, with incorporation or reduction of molecular oxygen;GO:0016209//antioxidant activity	GO:0008152//metabolic process;GO:0019725//cellular homeostasis	gi|568843528|ref|XP_006475658.1|/2.02516e-86/PREDICTED: peroxiredoxin-2B-like [Citrus sinensis]
Cs1g12600	Cs1g12600.1	306.16	290.23	281.47	4972.33	321.3	282.31	252.08	323.5	292.66	199.38	257.84	266.81	313.81	321.84	335.55	307.9	357.41	290.81	gene=Cs1g12600 CDS=160-2568	K01115|1|0.0|1587|cic:CICLE_v10024917mg|phospholipase D1/2 [EC:3.1.4.4]	GO:0043231//intracellular membrane-bounded organelle;GO:0016020//membrane	GO:0046872//metal ion binding;GO:0004620//phospholipase activity	GO:0006650//glycerophospholipid metabolic process	gi|568821808|ref|XP_006465340.1|/0/PREDICTED: phospholipase D alpha 1 [Citrus sinensis]
Cs3g19060	Cs3g19060.1	305.94	710.66	336.66	4972.33	183.81	137.12	719.39	593.65	591.53	637.42	259.47	353.87	264.16	378.82	174.22	174.11	260.55	225.94	gene=Cs3g19060 CDS=187-2895	K10534|1|0.0|1826|cit:102610866|nitrate reductase (NAD(P)H) [EC:1.7.1.1 1.7.1.2 1.7.1.3]	-	GO:0008940//nitrate reductase activity;GO:0005506//iron ion binding;GO:0050662//coenzyme binding	GO:0042126//nitrate metabolic process	gi|568837392|ref|XP_006472708.1|/0/PREDICTED: nitrate reductase [NAD(P)H]-like [Citrus sinensis]
Cs8g16010	Cs8g16010.1	305.54	517.56	353.84	4972.33	189.27	161.35	55.03	136.04	67.43	10.18	8.38	11.62	27.64	41.28	10.87	12.23	23.51	11.27	gene=Cs8g16010 CDS=1-1593	K02575|1|0.0|1008|cit:102613311|MFS transporter, NNP family, nitrate/nitrite transporter	-	-	GO:0006810//transport	gi|568869669|ref|XP_006488042.1|/0/PREDICTED: high affinity nitrate transporter 2.4-like [Citrus sinensis]
Cs3g21500	Cs3g21500.1	305.24	536.01	277.4	4972.33	328.97	185.52	135.76	344.39	265.65	126.76	233.9	149.02	136.21	183.73	221.76	138.76	152.37	101.34	gene=Cs3g21500 CDS=690-1229	-	-	-	-	gi|574282814|ref|NP_001276070.1|/9.34469e-53/abscisic stress-ripening protein 2-like [Citrus sinensis]
Cs7g30330	Cs7g30330.1	303.38	377.67	299.04	4972.33	340.56	317.7	538.82	135.3	323.56	615.56	186.87	167.24	100.3	79.79	66.81	144.17	69.98	98.42	gene=Cs7g30330 CDS=185-616	-	-	-	-	gi|567886632|ref|XP_006435838.1|/1.35433e-74/hypothetical protein CICLE_v10033013mg [Citrus clementina]
Cs4g11860	Cs4g11860.1,Cs4g11860.2	299.14	254.33	285.08	4972.33	253.07	316.65	70.68	136.86	109.87	21	57.45	61.87	131.02	109.79	125.23	100.2	114.86	82.95	gene=Cs4g11860 CDS=18-521	K03809|1|4e-83|308|cic:CICLE_v10009497mg|NAD(P)H dehydrogenase (quinone) [EC:1.6.5.2]	-	GO:0000166//nucleotide binding;GO:0003824//catalytic activity;GO:0000166//nucleotide binding;GO:0003824//catalytic activity	-	gi|567920210|ref|XP_006452111.1|/1.83402e-83/hypothetical protein CICLE_v10009497mg [Citrus clementina]
Cs2g05090	Cs2g05090.1	297.63	258.02	307.61	4972.33	272.99	310.96	16.2	97.96	79.94	17.35	58.53	88.28	156.19	119.58	114.7	101.89	151.15	72.26	gene=Cs2g05090 CDS=310-1641	K15400|1|2e-53|211|cam:101506221|omega-hydroxypalmitate O-feruloyl transferase [EC:2.3.1.188]	-	-	-	gi|568826638|ref|XP_006467678.1|/0/PREDICTED: taxadien-5-alpha-ol O-acetyltransferase-like [Citrus sinensis]
Cs1g19010	Cs1g19010.1	297.52	248.84	311.65	4972.33	293.49	350.15	310.4	259.17	244.59	261.58	187	195.45	328.29	312.98	272.93	258.36	262.67	222.8	gene=Cs1g19010 CDS=1-894	K01527|1|1e-76|286|cic:CICLE_v10022594mg|nascent polypeptide-associated complex subunit beta	-	-	-	gi|567897808|ref|XP_006441392.1|/6.28093e-76/hypothetical protein CICLE_v10022594mg [Citrus clementina]
Cs2g21820	Cs2g21820.1,Cs2g21820.2	296.81	111.93	198.6	4972.33	214.54	309.35	22.2	130.23	122.46	18.39	35.58	97.22	166.13	136.43	105.22	96.84	125.27	89.31	gene=Cs2g21820 CDS=375-1352	K00430|1|5e-176|618|cic:CICLE_v10015924mg|peroxidase [EC:1.11.1.7]	-	GO:0005506//iron ion binding;GO:0003824//catalytic activity;GO:0016209//antioxidant activity;GO:0005506//iron ion binding;GO:0003824//catalytic activity;GO:0016209//antioxidant activity	GO:0008152//metabolic process;GO:0006950//response to stress;GO:0008152//metabolic process;GO:0006950//response to stress	gi|567910405|ref|XP_006447516.1|/1.84004e-142/hypothetical protein CICLE_v10015924mg [Citrus clementina]
Cs6g08380	Cs6g08380.1	295.34	298.93	333.52	4972.33	374.31	284.99	197.06	163.22	225.6	373.14	323.53	365.64	100.49	111.68	144.91	143.26	105.18	107.15	gene=Cs6g08380 CDS=1-253	-	-	-	-	gi|641837680|gb|KDO56630.1|/6.3196e-13/hypothetical protein CISIN_1g038399mg [Citrus sinensis]
Cs3g22850	Cs3g22850.1,Cs3g22850.2	295.16	206.88	241.33	4972.33	207.15	206	357.18	191.95	367.52	612.66	333.32	434.65	119.56	135.82	147.17	233.69	158.01	233.12	gene=Cs3g22850 CDS=188-1735	-	GO:0031224//intrinsic component of membrane;GO:0031224//intrinsic component of membrane	-	GO:0051234//establishment of localization;GO:0051234//establishment of localization	gi|568838496|ref|XP_006473247.1|/0/PREDICTED: patellin-2-like [Citrus sinensis]
Cs9g13060	Cs9g13060.1	294.62	304.25	292.73	4972.33	300.39	291.55	254.05	257.08	266.39	253.79	208.84	215.31	306.86	279.53	286.19	285.5	315.99	257.92	gene=Cs9g13060 CDS=1-555	K01522|1|2e-76|284|cit:102621441|bis(5'-adenosyl)-triphosphatase [EC:3.6.1.29]	-	-	-	gi|568873773|ref|XP_006490001.1|/1.19305e-75/PREDICTED: uncharacterized protein LOC102621441 [Citrus sinensis]
Cs7g30280	Cs7g30280.1	294.39	394.54	288.09	4972.33	373.36	346.53	353.79	335.7	466.92	785.76	876.69	974.97	337.61	243.13	271.17	636.46	414.67	654.89	gene=Cs7g30280 CDS=1-564	-	-	-	-	gi|641825591|gb|KDO44857.1|/1.94433e-97/hypothetical protein CISIN_1g041268mg, partial [Citrus sinensis]
Cs3g27625	Cs3g27625.1	293.58	291.5	274	4972.33	315.27	343.73	88.77	159.76	150.56	125.07	134.41	143.09	93.43	83.86	87.69	84.07	103	95.13	gene=Cs3g27625 CDS=34-180	-	-	-	-	gi|567885737|ref|XP_006435427.1|/5.6878e-14/hypothetical protein CICLE_v10003083mg [Citrus clementina]
Cs5g18790	Cs5g18790.1,Cs5g18790.2,Cs5g18790.3	293.4	175.67	256.94	4972.33	289.9	355.37	319.26	277.3	254.95	281.14	215	222.62	334.65	333.73	297.94	280.93	279.21	234.37	gene=Cs5g18790 CDS=111-731	K02873|1|2e-98|359|cit:102613171|large subunit ribosomal protein L13e	GO:0030529//intracellular ribonucleoprotein complex;GO:0030529//intracellular ribonucleoprotein complex;GO:0030529//intracellular ribonucleoprotein complex	GO:0005198//structural molecule activity;GO:0005198//structural molecule activity;GO:0005198//structural molecule activity	GO:0010467//gene expression;GO:0010467//gene expression;GO:0010467//gene expression	gi|568849090|ref|XP_006478303.1|/9.44695e-98/PREDICTED: 60S ribosomal protein L13-1-like [Citrus sinensis]
Cs3g07500	Cs3g07500.1,Cs3g07500.2,Cs3g07500.3,Cs3g07500.4,Cs3g07500.5,Cs3g07500.6	291.49	174.33	270.68	4972.33	265.75	405.81	101.72	129.85	87.82	54.03	49.82	63.05	182.55	170.3	157.73	150.73	157.97	126.42	gene=Cs3g07500 CDS=23-301	K02943|1|5e-12|71.6|cic:CICLE_v10029621mg|large subunit ribosomal protein LP2	GO:0030529//intracellular ribonucleoprotein complex	GO:0005198//structural molecule activity	GO:0006412//translation	gi|568834517|ref|XP_006471373.1|/2.37301e-25/PREDICTED: 60S acidic ribosomal protein P2A-like isoform X1 [Citrus sinensis]
Cs6g10400	Cs6g10400.1	289.81	263.43	242.63	4972.33	243.13	315.98	91.83	130.53	103.63	82.72	91.76	104.12	124.52	99.61	88.35	95.26	107.86	103.99	gene=Cs6g10400 CDS=77-277	K03945|1|3e-24|110|tcc:TCM_019652|NADH dehydrogenase (ubiquinone) 1 alpha subcomplex subunit 1	-	-	-	gi|641845302|gb|KDO64190.1|/2.2683e-31/hypothetical protein CISIN_1g035376mg [Citrus sinensis]
Cs6g13030	Cs6g13030.1,Cs6g13030.2,Cs6g13030.3,Cs6g13030.4	289.6	183.29	264.66	4972.33	270.94	351.06	193.45	183.65	147.46	192.76	116.49	110.59	205.95	206.8	172.21	146.85	186.3	139.9	gene=Cs6g13030 CDS=66-689	K02989|1|1e-112|406|cit:102622374|small subunit ribosomal protein S5e	GO:0030529//intracellular ribonucleoprotein complex;GO:0030529//intracellular ribonucleoprotein complex;GO:0030529//intracellular ribonucleoprotein complex;GO:0030529//intracellular ribonucleoprotein complex	GO:0003676//nucleic acid binding;GO:0005198//structural molecule activity;GO:0003676//nucleic acid binding;GO:0005198//structural molecule activity;GO:0003676//nucleic acid binding;GO:0005198//structural molecule activity;GO:0003676//nucleic acid binding;GO:0005198//structural molecule activity	GO:0010467//gene expression;GO:0010467//gene expression;GO:0010467//gene expression;GO:0010467//gene expression	gi|568856202|ref|XP_006481676.1|/7.53725e-112/PREDICTED: 40S ribosomal protein S5-2-like isoform X1 [Citrus sinensis]
Cs3g16600	Cs3g16600.1	289.35	240.13	246.69	4972.33	286.68	327.22	27.52	96.38	101.54	13.96	32.19	57.15	237.2	282.73	261.81	124.65	277.96	138.24	gene=Cs3g16600 CDS=295-1650	K07374|1|0.0|841|cit:102577964|tubulin alpha	GO:0032991//macromolecular complex;GO:0015630//microtubule cytoskeleton	GO:0017111//nucleoside-triphosphatase activity;GO:0032561//guanyl ribonucleotide binding	GO:0043623//cellular protein complex assembly;GO:0009207;GO:0007017//microtubule-based process	gi|568836701|ref|XP_006472373.1|/0/PREDICTED: tubulin alpha chain isoform X2 [Citrus sinensis]
Cs1g01370	Cs1g01370.1	288.52	291.78	253.26	4972.33	302.46	321.45	117.01	152.97	179.95	218.84	152.41	214.9	172.63	167.35	162.05	120.44	131.84	120.83	gene=Cs1g01370 CDS=244-783	-	-	-	-	gi|567871095|ref|XP_006428169.1|/6.7884e-100/hypothetical protein CICLE_v10026538mg [Citrus clementina]
Cs3g27380	Cs3g27380.1,Cs3g27380.2,Cs3g27380.3,Cs3g27380.4,Cs3g27380.5,Cs3g27380.6	288.44	381.42	329.06	4972.33	294.88	270.37	260	190.08	219.63	295.1	172.53	190.3	197.44	219.88	198.94	227.9	156.32	200	gene=Cs3g27380 CDS=350-691	K10802|1|1e-35|152|vvi:100246082|high mobility group protein B1;K11296|2|1e-31|139|bvg:104905928|high mobility group protein B3	-	GO:0003676//nucleic acid binding;GO:0003676//nucleic acid binding;GO:0003676//nucleic acid binding;GO:0003676//nucleic acid binding;GO:0003676//nucleic acid binding;GO:0003676//nucleic acid binding	-	gi|641866438|gb|KDO85123.1|/5.11875e-50/hypothetical protein CISIN_1g031906mg [Citrus sinensis]
orange1.1t02719	orange1.1t02719.1	287.38	344.81	262.88	4972.33	300.44	269.87	76.71	178.24	177.97	65.44	109.09	120.12	203.61	191.69	168.32	121.3	190.32	100.95	gene=orange1.1t02719 CDS=356-2173	K01051|1|9e-132|471|pvu:PHAVU_007G218500g|pectinesterase [EC:3.1.1.11]	-	-	-	gi|568880823|ref|XP_006493306.1|/0/PREDICTED: probable pectinesterase/pectinesterase inhibitor 61-like [Citrus sinensis]
Cs4g12300	Cs4g12300.1	286.19	322.62	264.38	4972.33	278.42	289.49	212.28	281.76	285.62	259.87	285.15	282.62	251.6	247.68	261.18	262.32	255.98	264.5	gene=Cs4g12300 CDS=1-711	K13422|1|1e-06|53.9|atr:18429253|transcription factor MYC2	-	-	-	gi|568842761|ref|XP_006475303.1|/2.67959e-107/PREDICTED: transcription factor ILR3-like [Citrus sinensis]
Cs5g27960	Cs5g27960.1,Cs5g27960.2	284.83	168.06	243.07	4972.33	277.01	345.77	151.4	159	124.32	159.37	94.29	90.58	210.14	189.13	152.83	118.28	169.02	117.91	gene=Cs5g27960 CDS=202-741	K02872|1|6e-100|363|cic:CICLE_v10023466mg|large subunit ribosomal protein L13Ae	GO:0030529//intracellular ribonucleoprotein complex;GO:0030529//intracellular ribonucleoprotein complex	GO:0005198//structural molecule activity;GO:0005198//structural molecule activity	GO:0010467//gene expression;GO:0010467//gene expression	gi|567902228|ref|XP_006443602.1|/3.38598e-99/hypothetical protein CICLE_v10023466mg, partial [Citrus clementina]
Cs3g18550	Cs3g18550.1	284.82	171.81	231.26	4972.33	211.44	280.02	99.33	267.92	215.86	60.77	223.04	360.61	375.08	347.02	288.88	228.42	393.86	259.89	gene=Cs3g18550 CDS=166-645	K03036|1|2e-21|103|aly:ARALYDRAFT_336019|26S proteasome regulatory subunit N6;K12951|2|1e-06|55.1|smo:SELMODRAFT_448085|cation-transporting P-type ATPase D [EC:3.6.3.-]	GO:0044421;GO:0044464	-	-	gi|641862219|gb|KDO80906.1|/1.16311e-76/hypothetical protein CISIN_1g031458mg [Citrus sinensis]
Cs8g12480	Cs8g12480.1,Cs8g12480.2,Cs8g12480.3	283.34	191.18	242.27	4972.33	245.1	339.01	104.86	241.5	185.7	157.58	229.07	261.05	143.47	110.89	95.02	85.82	122.12	89.62	gene=Cs8g12480 CDS=310-648	-	-	-	-	gi|641824858|gb|KDO44161.1|/2.32554e-28/hypothetical protein CISIN_1g032433mg [Citrus sinensis]
Cs5g24670	Cs5g24670.1	282.31	283.85	429.12	4972.33	385.52	309.69	497.2	549.86	1098.49	1089.18	650.13	631.79	316.66	405.95	347.33	211.59	194.49	217.13	gene=Cs5g24670 CDS=162-491	-	-	-	GO:0010876//lipid localization	gi|641831480|gb|KDO50536.1|/3.23397e-43/hypothetical protein CISIN_1g046518mg [Citrus sinensis]
Cs7g32160	Cs7g32160.1	281.54	333.79	298.47	4972.33	509.52	372.78	162.99	204.08	187.13	211.22	227.8	208.86	231.51	317.74	435.52	481.58	612.44	630.15	gene=Cs7g32160 CDS=1-624	-	-	-	GO:0010876//lipid localization	gi|567886124|ref|XP_006435584.1|/1.02818e-58/hypothetical protein CICLE_v10033080mg [Citrus clementina]
Cs6g16900	Cs6g16900.1,Cs6g16900.2	281.44	226.42	223.24	4972.33	285.96	268.79	169.09	198.79	173.82	97.79	120.26	116.8	287.1	350.15	304.85	200.45	360.24	213.63	gene=Cs6g16900 CDS=125-1471	K07375|1|0.0|854|cit:102608054|tubulin beta	GO:0032991//macromolecular complex;GO:0015630//microtubule cytoskeleton;GO:0032991//macromolecular complex;GO:0015630//microtubule cytoskeleton	GO:0017111//nucleoside-triphosphatase activity;GO:0032561//guanyl ribonucleotide binding;GO:0017111//nucleoside-triphosphatase activity;GO:0032561//guanyl ribonucleotide binding	GO:0043623//cellular protein complex assembly;GO:0009207;GO:0007017//microtubule-based process;GO:0043623//cellular protein complex assembly;GO:0009207;GO:0007017//microtubule-based process	gi|568856992|ref|XP_006482055.1|/0/PREDICTED: tubulin beta-1 chain-like [Citrus sinensis]
Cs9g07750	Cs9g07750.1	279.44	182.09	319.63	4972.33	345.08	362.4	197.1	311.34	224.66	93.55	255.3	168.98	329.55	276.98	369.51	302.34	245.3	284.73	gene=Cs9g07750 CDS=208-1602	K13811|1|0.0|940|cic:CICLE_v10004927mg|3'-phosphoadenosine 5'-phosphosulfate synthase [EC:2.7.7.4 2.7.1.25]	GO:0016020//membrane;GO:0009536//plastid	GO:0004779//sulfate adenylyltransferase activity	GO:0006790//sulfur compound metabolic process;GO:0010038//response to metal ion	gi|567853856|ref|XP_006420048.1|/0/hypothetical protein CICLE_v10004927mg [Citrus clementina]
Cs6g13810	Cs6g13810.1	278.66	327.28	257.69	4972.33	265.12	284.41	182.28	268.86	319.08	371.93	361.06	400.73	233.12	216.79	213.41	185.36	178.12	158.25	gene=Cs6g13810 CDS=87-716	-	-	-	GO:0002252	gi|568856012|ref|XP_006481585.1|/7.86281e-96/PREDICTED: protein YLS9-like [Citrus sinensis]
Cs8g18060	Cs8g18060.1,Cs8g18060.2,Cs8g18060.3	278.36	316.32	269.22	4972.33	276.13	286.58	306.54	382.49	393.08	217.14	311.94	347.82	394.21	387.02	402.98	371.65	425.21	340.83	gene=Cs8g18060 CDS=181-660	K05765|1|6e-74|278|cit:102628579|cofilin	GO:0044464;GO:0044464;GO:0044464	GO:0008092//cytoskeletal protein binding;GO:0008092//cytoskeletal protein binding;GO:0008092//cytoskeletal protein binding	-	gi|567864244|ref|XP_006424771.1|/1.01846e-74/hypothetical protein CICLE_v10029538mg [Citrus clementina]
Cs7g08790	Cs7g08790.1,Cs7g08790.2,Cs7g08790.3,Cs7g08790.4,Cs7g08790.5	278.03	299.37	295.81	4972.33	323.87	317.03	329.74	230.57	243.28	295.83	227.34	195.3	182.99	182.27	181.24	157.98	150.43	145.81	gene=Cs7g08790 CDS=465-1010	K07937|1|4e-109|395|cic:CICLE_v10032807mg|ADP-ribosylation factor 1	-	-	-	gi|357485863|ref|XP_003613219.1|/2.99364e-100/ADP-ribosylation factor [Medicago truncatula]
Cs9g03160	Cs9g03160.1	277.96	207.39	223.54	4972.33	205.29	294.15	27.89	62.99	64.6	12.87	34.64	83.5	76.52	70.97	95.24	87.11	139.37	88.69	gene=Cs9g03160 CDS=356-559	-	-	-	-	gi|568871527|ref|XP_006488935.1|/5.06158e-11/PREDICTED: arabinogalactan peptide 13-like [Citrus sinensis]
Cs7g03030	Cs7g03030.1	276.81	389.8	299.01	4972.33	209.06	234.64	227.08	331.45	283.15	213.99	259.1	154.2	153.6	162.69	187.89	190.88	165.19	161.56	gene=Cs7g03030 CDS=541-1077	K14488|1|3e-83|309|cit:102613185|SAUR family protein	-	-	-	gi|568859032|ref|XP_006483047.1|/1.80148e-82/PREDICTED: uncharacterized protein LOC102613185 [Citrus sinensis]
orange1.1t03044	orange1.1t03044.1,orange1.1t03044.2,orange1.1t03044.3,orange1.1t03044.4,orange1.1t03044.5,orange1.1t03044.6,orange1.1t03044.7	275.78	330.58	336.16	4972.33	269.63	163.08	241.7	246.95	221.28	176.67	180.59	96.82	310	357.19	250.33	228.2	147.31	105.78	gene=orange1.1t03044 CDS=592-2427	K08867|1|1e-08|62.8|aly:ARALYDRAFT_674863|WNK lysine deficient protein kinase [EC:2.7.11.1];K13422|2|1e-07|59.7|vvi:100246135|transcription factor MYC2	-	-	-	gi|568881404|ref|XP_006493563.1|/0/PREDICTED: transcription factor EMB1444-like [Citrus sinensis]
orange1.1t01890	orange1.1t01890.1,orange1.1t01890.2	275.68	235.43	262.89	4972.33	246.13	291.76	38.33	128.06	88.49	24.52	46.49	58.11	204.25	205.58	194.98	124.83	206.25	125.79	gene=orange1.1t01890 CDS=256-1332	K00600|1|0.0|710|cit:102617050|glycine hydroxymethyltransferase [EC:2.1.2.1]	-	GO:0016742//hydroxymethyl-, formyl- and related transferase activity;GO:0048037//cofactor binding;GO:0016742//hydroxymethyl-, formyl- and related transferase activity;GO:0048037//cofactor binding	GO:0006730//one-carbon metabolic process;GO:0009069//serine family amino acid metabolic process;GO:0006730//one-carbon metabolic process;GO:0009069//serine family amino acid metabolic process	gi|568879149|ref|XP_006492539.1|/0/PREDICTED: serine hydroxymethyltransferase 4-like [Citrus sinensis]
Cs9g17130	Cs9g17130.1	273.79	307.18	288.39	4972.33	294.62	251.1	257.39	297.83	281.47	245.05	278.15	278.55	249.99	246.56	216.76	210.36	182.69	174.4	gene=Cs9g17130 CDS=187-906	K17278|1|4e-134|478|cic:CICLE_v10005756mg|membrane-associated progesterone receptor component	-	GO:0016628//oxidoreductase activity, acting on the CH-CH group of donors, NAD or NADP as acceptor;GO:0005506//iron ion binding	GO:0008152//metabolic process	gi|567858432|ref|XP_006421899.1|/2.40276e-133/hypothetical protein CICLE_v10005756mg [Citrus clementina]
Cs3g26180	Cs3g26180.1	272.29	214.1	214.31	4972.33	232.82	249.85	123.59	159.4	160.83	147.13	120.9	141.31	80.16	73.04	75.12	59.7	88.41	64.52	gene=Cs3g26180 CDS=339-1685	K07375|1|0.0|834|cic:CICLE_v10001140mg|tubulin beta	GO:0032991//macromolecular complex;GO:0015630//microtubule cytoskeleton	GO:0017111//nucleoside-triphosphatase activity;GO:0032561//guanyl ribonucleotide binding	GO:0043623//cellular protein complex assembly;GO:0009207;GO:0007017//microtubule-based process	gi|568839386|ref|XP_006473665.1|/0/PREDICTED: tubulin beta-6 chain-like [Citrus sinensis]
Cs8g06560	Cs8g06560.1	272.18	316.38	276.7	4972.33	339.12	335.97	20.24	55.98	40.82	33.09	90.4	94.62	9.43	5.51	7.75	7.34	6.77	6.07	gene=Cs8g06560 CDS=51-854	-	-	-	-	gi|567915942|ref|XP_006450014.1|/7.82731e-143/hypothetical protein CICLE_v10013967mg [Citrus clementina]
Cs1g16310	Cs1g16310.1	271.82	171.42	251.45	4972.33	270.71	342.09	218.1	232.74	167.82	126.89	90.28	114.85	350.3	302.67	262.75	199.35	294.31	176.9	gene=Cs1g16310 CDS=127-492	K02942|1|2e-29|129|cic:CICLE_v10002863mg|large subunit ribosomal protein LP1	GO:0005840//ribosome;GO:0043231//intracellular membrane-bounded organelle;GO:0016020//membrane	GO:0005198//structural molecule activity	GO:0006412//translation	gi|568822707|ref|XP_006465770.1|/1.19916e-28/PREDICTED: 60S acidic ribosomal protein P3-2-like [Citrus sinensis]
Cs3g26970	Cs3g26970.1	271.18	448.7	339.23	4972.33	419.09	256.03	564.25	800.54	703.12	357.69	496.14	450.17	1364.65	1467.98	1917.13	577.04	663.12	524.17	gene=Cs3g26970 CDS=1163-1867	-	-	-	-	gi|572152886|ref|NP_001275806.1|/7.84329e-65/dehydrin [Citrus sinensis]
Cs7g28790	Cs7g28790.1,Cs7g28790.2	270.3	191.64	275.67	4972.33	286.28	370.58	296.21	199.42	172.76	163.93	114.39	136.11	184.24	202.91	194.98	148.69	202.38	123.01	gene=Cs7g28790 CDS=157-549	K02957|1|4e-70|266|jcu:105641573|small subunit ribosomal protein S15Ae	GO:0031090//organelle membrane;GO:0043231//intracellular membrane-bounded organelle;GO:0015935//small ribosomal subunit;GO:0030312//external encapsulating structure;GO:0031090//organelle membrane;GO:0043231//intracellular membrane-bounded organelle;GO:0015935//small ribosomal subunit;GO:0030312//external encapsulating structure	GO:0005198//structural molecule activity;GO:0005198//structural molecule activity	GO:0010467//gene expression;GO:0010467//gene expression	gi|351720707|ref|NP_001238465.1|/5.34725e-68/uncharacterized protein LOC100305645 [Glycine max]
Cs3g26510	Cs3g26510.1	267.09	277.42	257.82	4972.33	253.08	282.39	216.5	215.93	229.66	278.48	235.14	266.89	269.46	249.13	269.92	280.67	287.8	271.95	gene=Cs3g26510 CDS=212-688	K03094|1|3e-79|296|cic:CICLE_v10002751mg|S-phase kinase-associated protein 1	-	-	GO:0019941//modification-dependent protein catabolic process	gi|567885337|ref|XP_006435227.1|/1.47764e-78/hypothetical protein CICLE_v10002751mg [Citrus clementina]
Cs3g26260	Cs3g26260.1,Cs3g26260.2,Cs3g26260.3	266.54	134.75	211.72	4972.33	218.32	297.58	96.86	193.31	123.15	82.48	92.51	129.09	203.89	192.59	209.86	155.27	346.15	288.12	gene=Cs3g26260 CDS=271-2739	K09487|1|0.0|1130|cit:102608412|heat shock protein 90kDa beta	GO:0044424;GO:0044424;GO:0044424	GO:0005515//protein binding;GO:0032559;GO:0005515//protein binding;GO:0032559;GO:0005515//protein binding;GO:0032559	GO:0044267//cellular protein metabolic process;GO:0050896//response to stimulus;GO:0044267//cellular protein metabolic process;GO:0050896//response to stimulus;GO:0044267//cellular protein metabolic process;GO:0050896//response to stimulus	gi|568839402|ref|XP_006473673.1|/0/PREDICTED: endoplasmin homolog [Citrus sinensis]
Cs6g14330	Cs6g14330.1	265.26	194.57	250.79	4972.33	271.14	324.76	482.19	440.39	427.21	612.14	493.63	402.27	366.44	355.11	326.34	298.12	317.42	293.09	gene=Cs6g14330 CDS=1-864	K02927|1|2e-67|256|cic:CICLE_v10013083mg|large subunit ribosomal protein L40e;K02955|3|7e-64|245|cic:CICLE_v10013022mg|small subunit ribosomal protein S14e	GO:0043231//intracellular membrane-bounded organelle;GO:0030529//intracellular ribonucleoprotein complex	GO:0005198//structural molecule activity	GO:0010467//gene expression	gi|567875135|ref|XP_006430157.1|/1.2208e-66/hypothetical protein CICLE_v10013083mg [Citrus clementina]
Cs5g30230	Cs5g30230.1	265.06	430.81	299.41	4972.33	308.87	237.37	146.94	124.66	148.88	93.5	62.67	108.23	129.06	124.89	158.77	242.41	200.21	156.88	gene=Cs5g30230 CDS=155-1036	K11275|1|2e-30|134|cic:CICLE_v10021453mg|histone H1/5	-	-	-	gi|567902816|ref|XP_006443896.1|/1.35927e-29/hypothetical protein CICLE_v10021453mg [Citrus clementina]
Cs5g15575	Cs5g15575.1	264.32	230.01	274.35	4972.33	274.07	340.6	289.51	328.01	271.5	148.99	162.22	175.08	400.73	376.19	355.98	290.69	361.98	247.85	gene=Cs5g15575 CDS=190-263	-	-	-	-	-
Cs6g19210	Cs6g19210.1	264.26	163.45	236.25	4972.33	235.11	279.33	175.76	377.51	287.49	58.77	127.57	145.71	303.98	251.7	266.83	125.03	154.42	95.7	gene=Cs6g19210 CDS=1-1086	K01611|1|0.0|701|cic:CICLE_v10013866mg|S-adenosylmethionine decarboxylase [EC:4.1.1.50]	-	GO:0016831//carboxy-lyase activity	GO:0006596//polyamine biosynthetic process	gi|641839962|gb|KDO58885.1|/0/hypothetical protein CISIN_1g039582mg [Citrus sinensis]
orange1.1t01732	orange1.1t01732.1,orange1.1t01732.2,orange1.1t01732.3,orange1.1t01732.4	264	219.93	276.75	4972.33	299.82	334.32	326.28	259.74	255.13	293.72	205.24	250.36	219.81	215.94	215.95	192.62	176.15	183.48	gene=orange1.1t01732 CDS=191-736	K07937|1|9e-101|368|pper:PRUPE_ppa010615mg|ADP-ribosylation factor 1	GO:0043231//intracellular membrane-bounded organelle;GO:0043231//intracellular membrane-bounded organelle;GO:0043231//intracellular membrane-bounded organelle;GO:0043231//intracellular membrane-bounded organelle	GO:0032561//guanyl ribonucleotide binding;GO:0032561//guanyl ribonucleotide binding;GO:0032561//guanyl ribonucleotide binding;GO:0032561//guanyl ribonucleotide binding	GO:0035556//intracellular signal transduction;GO:0035556//intracellular signal transduction;GO:0035556//intracellular signal transduction;GO:0035556//intracellular signal transduction	gi|297736783|emb|CBI25984.3|/8.30275e-80/unnamed protein product [Vitis vinifera]
Cs7g29850	Cs7g29850.1,Cs7g29850.2,Cs7g29850.3	263.44	237.5	305.13	4972.33	243.95	248.75	624.48	300.35	562.29	932.57	480.87	554.99	235.59	228.92	200.29	376.91	213.71	322.43	gene=Cs7g29850 CDS=166-1020	K04564|1|2e-84|313|cic:CICLE_v10032324mg|superoxide dismutase, Fe-Mn family [EC:1.15.1.1]	GO:0044429	GO:0003824//catalytic activity;GO:0016209//antioxidant activity;GO:0043169//cation binding;GO:0016209//antioxidant activity;GO:0043169//cation binding;GO:0003824//catalytic activity	GO:0072593//reactive oxygen species metabolic process;GO:0072593//reactive oxygen species metabolic process	gi|567886766|ref|XP_006435905.1|/1.95798e-167/hypothetical protein CICLE_v10032324mg [Citrus clementina]
Cs3g25710	Cs3g25710.1	263.23	249.51	242.37	4972.33	263.35	305.34	60.1	76.51	50.75	43.79	33.59	40.45	75.68	86.27	72.66	62.13	82.53	68.22	gene=Cs3g25710 CDS=1-501	K02155|1|2e-58|224|cic:CICLE_v10002710mg|V-type H+-transporting ATPase 16kDa proteolipid subunit	GO:0016469//proton-transporting two-sector ATPase complex;GO:0043231//intracellular membrane-bounded organelle;GO:0031410//cytoplasmic vesicle	-	GO:0015992//proton transport	gi|4519262|dbj|BAA75516.1|/8.43158e-58/vacuolar H+-ATPase c subunit [Citrus unshiu]
Cs2g02990	Cs2g02990.1,Cs2g02990.2,Cs2g02990.3	262.78	398.84	284.54	4972.33	341.69	272.7	61.67	145.17	113.5	118.59	143.74	155.67	142.08	107.37	161.17	134.81	202.1	132.42	gene=Cs2g02990 CDS=49-924	K01759|1|8e-160|563|cit:102626646|lactoylglutathione lyase [EC:4.4.1.5]	-	GO:0016846//carbon-sulfur lyase activity;GO:0043169//cation binding;GO:0016846//carbon-sulfur lyase activity;GO:0043169//cation binding;GO:0016846//carbon-sulfur lyase activity;GO:0043169//cation binding	-	gi|568826116|ref|XP_006467420.1|/4.40519e-159/PREDICTED: putative lactoylglutathione lyase-like [Citrus sinensis]
Cs1g16760	Cs1g16760.1,Cs1g16760.2	262.65	179.59	235.65	4972.33	231.62	319.22	188.72	224.94	184.47	217.61	138.71	134.2	322.46	308.86	239.64	203.98	241.63	200.85	gene=Cs1g16760 CDS=135-1085	K02998|1|6e-160|564|cit:102626238|small subunit ribosomal protein SAe	GO:0030529//intracellular ribonucleoprotein complex;GO:0030529//intracellular ribonucleoprotein complex	GO:0005198//structural molecule activity;GO:0005198//structural molecule activity	GO:0010467//gene expression;GO:0010467//gene expression	gi|641826521|gb|KDO45739.1|/7.97747e-173/hypothetical protein CISIN_1g018448mg [Citrus sinensis]
orange1.1t02181	orange1.1t02181.1,orange1.1t02181.2	262.41	142.86	238.24	4972.33	234.37	295.11	253.41	214.3	184.46	196.43	136.4	126.16	245.51	251.38	209.94	176.49	201.42	168.68	gene=orange1.1t02181 CDS=151-828	K02932|1|2e-121|420|cic:CICLE_v10020582mg|large subunit ribosomal protein L5e	GO:0030529//intracellular ribonucleoprotein complex;GO:0030529//intracellular ribonucleoprotein complex	GO:0019843//rRNA binding;GO:0005198//structural molecule activity;GO:0019843//rRNA binding;GO:0005198//structural molecule activity	GO:0010467//gene expression;GO:0010467//gene expression	gi|567899406|ref|XP_006442191.1|/1.02509e-172/hypothetical protein CICLE_v10020582mg [Citrus clementina]
Cs8g05340	Cs8g05340.1,Cs8g05340.2,Cs8g05340.3	262.33	238.74	252.82	4972.33	267.48	283.44	467.63	360.99	337.04	363.3	248.88	250.02	359.84	345.98	318.66	252.96	284.73	236.88	gene=Cs8g05340 CDS=451-2184	K13126|1|0.0|866|cic:CICLE_v10027999mg|polyadenylate-binding protein	-	GO:0003676//nucleic acid binding;GO:0003676//nucleic acid binding	-	gi|567860642|ref|XP_006422975.1|/0/hypothetical protein CICLE_v10027999mg [Citrus clementina]
Cs9g05220	Cs9g05220.1,Cs9g05220.2,Cs9g05220.3,Cs9g05220.4,Cs9g05220.5	260.2	254.33	226.86	4972.33	224.7	247.48	130.34	206.52	211.81	160.58	99.36	164.6	85.2	47.92	71.23	75.46	68.75	35.23	gene=Cs9g05220 CDS=126-1289	K08145|1|3e-149|530|vvi:100263109|MFS transporter, SP family, solute carrier family 2 (facilitated glucose transporter), member 8;K08150|5|6e-45|183|bdi:100840379|MFS transporter, SP family, solute carrier family 2 (myo-inositol transporter), member 13	GO:0016020//membrane;GO:0031224//intrinsic component of membrane;GO:0016020//membrane;GO:0016020//membrane;GO:0031224//intrinsic component of membrane	GO:0022891//substrate-specific transmembrane transporter activity;GO:0016628//oxidoreductase activity, acting on the CH-CH group of donors, NAD or NADP as acceptor;GO:0022891//substrate-specific transmembrane transporter activity;GO:0022891//substrate-specific transmembrane transporter activity;GO:0005215//transporter activity;GO:0022891//substrate-specific transmembrane transporter activity	GO:0006810//transport;GO:0008152//metabolic process;GO:0071702//organic substance transport;GO:0006810//transport;GO:0006810//transport;GO:0006810//transport	gi|567853131|ref|XP_006419729.1|/0/hypothetical protein CICLE_v10004839mg [Citrus clementina]
Cs3g07610	Cs3g07610.1	259.38	227.94	262.48	4972.33	258.32	278.66	194.02	253.74	206.2	234.03	167.74	231.63	128.18	127.04	166.3	119.43	120.49	111.68	gene=Cs3g07610 CDS=1-210	-	GO:0005743//mitochondrial inner membrane	GO:0015002//heme-copper terminal oxidase activity	-	gi|568834550|ref|XP_006471389.1|/9.40467e-33/PREDICTED: uncharacterized protein LOC102612945 isoform X1 [Citrus sinensis]
Cs1g24740	Cs1g24740.1,Cs1g24740.2	257.9	295.16	231.58	4972.33	327.4	272.42	99.81	105.1	100.43	107.77	104.76	119.26	246.65	211.19	232.73	259.21	318.41	236.43	gene=Cs1g24740 CDS=211-570	K03671|1|3e-62|239|cic:CICLE_v10026781mg|thioredoxin 1	GO:0044444//cytoplasmic part;GO:0044444//cytoplasmic part	GO:0015036//disulfide oxidoreductase activity;GO:0030234//enzyme regulator activity;GO:0015036//disulfide oxidoreductase activity;GO:0030234//enzyme regulator activity	GO:0051234//establishment of localization;GO:0018904;GO:0019725//cellular homeostasis;GO:0044093;GO:0006091//generation of precursor metabolites and energy;GO:0051234//establishment of localization;GO:0018904;GO:0019725//cellular homeostasis;GO:0044093;GO:0006091//generation of precursor metabolites and energy	gi|567865937|ref|XP_006425591.1|/1.43157e-61/hypothetical protein CICLE_v10026781mg [Citrus clementina]
Cs9g02480	Cs9g02480.1,Cs9g02480.2	257.85	201.04	244.39	4972.33	233.18	330.8	138.13	211.97	159.47	146.16	150.96	146.55	241.59	235.68	199.34	160.55	204.97	161.85	gene=Cs9g02480 CDS=44-226	K02905|1|1e-45|184|cic:CICLE_v10006499mg|large subunit ribosomal protein L29e	GO:0030529//intracellular ribonucleoprotein complex;GO:0030529//intracellular ribonucleoprotein complex	GO:0005198//structural molecule activity;GO:0005198//structural molecule activity	GO:0010467//gene expression;GO:0010467//gene expression	gi|568871372|ref|XP_006488862.1|/2.76922e-29/PREDICTED: 60S ribosomal protein L29-1-like [Citrus sinensis]
Cs5g09080	Cs5g09080.1	257.76	59.57	172.71	4972.33	189.64	302.69	8.7	98.84	142.49	30.7	47.38	169.05	109.67	87.13	87.78	106.29	130.94	83.83	gene=Cs5g09080 CDS=56-460	K02883|1|8e-24|111|zma:103646289|large subunit ribosomal protein L18e;K11855|2|2e-16|87.0|bvg:104906049|ubiquitin carboxyl-terminal hydrolase 36/42 [EC:3.4.19.12]	-	-	-	gi|568846806|ref|XP_006477234.1|/1.7097e-32/PREDICTED: 14 kDa proline-rich protein DC2.15-like [Citrus sinensis]
Cs4g15270	Cs4g15270.1,Cs4g15270.2,Cs4g15270.3,Cs4g15270.4,Cs4g15270.5,Cs4g15270.6	257.67	280.87	278.9	4972.33	302.35	253.83	204.92	238.02	244.36	187.38	217.58	194.21	283.52	260.68	229.7	241.7	220.9	224.86	gene=Cs4g15270 CDS=556-2046	K00029|1|0.0|959|cic:CICLE_v10007810mg|malate dehydrogenase (oxaloacetate-decarboxylating)(NADP+) [EC:1.1.1.40]	GO:0044424;GO:0044424;GO:0044424;GO:0044424	GO:0004470//malic enzyme activity;GO:0000166//nucleotide binding;GO:0043169//cation binding;GO:0016615//malate dehydrogenase activity;GO:0000166//nucleotide binding;GO:0043169//cation binding;GO:0004470//malic enzyme activity;GO:0000166//nucleotide binding;GO:0043169//cation binding;GO:0004470//malic enzyme activity;GO:0000166//nucleotide binding;GO:0043169//cation binding;GO:0004470//malic enzym…	GO:0043648//dicarboxylic acid metabolic process;GO:0043648//dicarboxylic acid metabolic process;GO:0043648//dicarboxylic acid metabolic process;GO:0043648//dicarboxylic acid metabolic process;GO:0043648//dicarboxylic acid metabolic process;GO:0043648//dicarboxylic acid metabolic process	gi|567918534|ref|XP_006451273.1|/0/hypothetical protein CICLE_v10007810mg [Citrus clementina]
Cs5g09060	Cs5g09060.1	257.09	66.69	191.47	4972.33	197.64	265.69	8.55	90.12	82.71	10.61	22.3	78.66	192.61	182.49	160.82	111.52	153.47	145.9	gene=Cs5g09060 CDS=178-570	K02883|1|1e-15|84.3|zma:103646289|large subunit ribosomal protein L18e;K11855|2|1e-08|60.8|bvg:104906049|ubiquitin carboxyl-terminal hydrolase 36/42 [EC:3.4.19.12]	-	-	-	gi|568846800|ref|XP_006477231.1|/2.82882e-44/PREDICTED: 14 kDa proline-rich protein DC2.15-like [Citrus sinensis]
Cs8g09790	Cs8g09790.1	255.75	212.26	214.27	4972.33	143.83	229.48	25.44	101.3	85.03	31.87	36.4	79.55	49.08	34.58	33.89	39.03	27.7	28.27	gene=Cs8g09790 CDS=1-984	K13265|1|7e-107|387|cam:101514431|vestitone reductase [EC:1.1.1.348]	-	GO:0048037//cofactor binding	GO:0008152//metabolic process	gi|568868375|ref|XP_006487475.1|/1.85321e-180/PREDICTED: vestitone reductase-like [Citrus sinensis]
Cs6g15850	Cs6g15850.1,Cs6g15850.2	255.56	226.44	270.46	4972.33	249.63	263.23	221.58	178.5	177.68	153.52	116.07	176.03	150.1	155.88	136.91	132.82	121.13	103.59	gene=Cs6g15850 CDS=398-961	K00799|1|6e-81|301|cit:102624040|glutathione S-transferase [EC:2.5.1.18]	GO:0043231//intracellular membrane-bounded organelle;GO:0043231//intracellular membrane-bounded organelle	GO:0016765//transferase activity, transferring alkyl or aryl (other than methyl) groups	-	gi|568856740|ref|XP_006481935.1|/3.50442e-80/PREDICTED: microsomal glutathione S-transferase 3-like [Citrus sinensis]
Cs3g14570	Cs3g14570.1,Cs3g14570.2	255.5	143.91	210.53	4972.33	236.52	306.55	143.45	176.48	128.93	130.9	82.95	87.9	261.72	251.57	179.26	142.26	173.06	123.69	gene=Cs3g14570 CDS=200-763	K02883|1|2e-91|336|cic:CICLE_v10002597mg|large subunit ribosomal protein L18e	GO:0030529//intracellular ribonucleoprotein complex;GO:0030529//intracellular ribonucleoprotein complex	GO:0005198//structural molecule activity;GO:0003676//nucleic acid binding;GO:0005198//structural molecule activity	GO:0010467//gene expression;GO:0010467//gene expression	gi|567881789|ref|XP_006433453.1|/5.15523e-93/hypothetical protein CICLE_v10002597mg [Citrus clementina]
Cs1g26280	Cs1g26280.1	254.92	187.6	98.92	4972.33	269.08	541.79	105.13	111.4	121.12	237.38	209.19	335.33	120.18	86.94	102.31	126.56	255.99	144.47	gene=Cs1g26280 CDS=1-918	K01191|1|8e-29|115|mdm:103411291|alpha-mannosidase [EC:3.2.1.24]	-	-	-	gi|217073804|gb|ACJ85262.1|/1.0196e-60/unknown [Medicago truncatula]
Cs5g05050	Cs5g05050.1,Cs5g05050.2,Cs5g05050.3,Cs5g05050.4,Cs5g05050.5,Cs5g05050.6,Cs5g05050.7,Cs5g05050.8	254.68	208.6	222.03	4972.33	224.8	223.96	82.1	100.24	94.31	84.31	72.22	116.56	227.47	225.48	210.24	244.14	250.97	235.6	gene=Cs5g05050 CDS=205-1800	K14611|1|0.0|968|cit:102606648|solute carrier family 23 (nucleobase transporter), member 1/2	GO:0030312//external encapsulating structure;GO:0043231//intracellular membrane-bounded organelle;GO:0030312//external encapsulating structure;GO:0043231//intracellular membrane-bounded organelle;GO:0030312//external encapsulating structure;GO:0043231//intracellular membrane-bounded organelle;GO:0030312//external encapsulating structure;GO:0043231//intracellular membrane-bounded organelle;GO:0030…	GO:0005215//transporter activity;GO:0005215//transporter activity;GO:0005215//transporter activity;GO:0005215//transporter activity;GO:0005215//transporter activity;GO:0005215//transporter activity;GO:0005215//transporter activity;GO:0005215//transporter activity	GO:0006810//transport;GO:0006810//transport;GO:0006810//transport;GO:0006810//transport;GO:0006810//transport;GO:0006810//transport;GO:0006810//transport;GO:0006810//transport	gi|568845756|ref|XP_006476733.1|/0/PREDICTED: nucleobase-ascorbate transporter 6-like isoform X1 [Citrus sinensis]
Cs8g10340	Cs8g10340.1	253.5	155.28	200.9	4972.33	114.35	340.76	8.76	82.65	89.72	9.04	47.68	113.78	145.32	96.96	122.06	100.46	62.52	73.04	gene=Cs8g10340 CDS=83-565	-	-	-	-	-
Cs8g05970	Cs8g05970.1	252.61	355.48	257.69	4972.33	164.11	144.89	202.68	192.14	174.39	106.93	103.77	108.4	186.56	183.81	147.44	132.51	134.03	104.13	gene=Cs8g05970 CDS=236-2026	K00366|1|0.0|1089|cit:102616714|ferredoxin-nitrite reductase [EC:1.7.7.1]	-	GO:0051540;GO:0005506//iron ion binding;GO:0016664	GO:0008152//metabolic process	gi|568867565|ref|XP_006487107.1|/0/PREDICTED: ferredoxin--nitrite reductase, chloroplastic-like [Citrus sinensis]
Cs2g21120	Cs2g21120.1,Cs2g21120.2	252.53	307.82	255.75	4972.33	294.74	259.49	383.02	333.86	330.26	411.07	348.42	332.1	275.71	245.51	269.06	270.98	272.87	290.42	gene=Cs2g21120 CDS=184-828	K01061|1|1e-77|290|cic:CICLE_v10016206mg|carboxymethylenebutenolidase [EC:3.1.1.45]	-	-	-	gi|567910553|ref|XP_006447590.1|/2.34244e-152/hypothetical protein CICLE_v10016206mg [Citrus clementina]
Cs9g03120	Cs9g03120.1,Cs9g03120.2	252.28	189.01	221.24	4972.33	208.27	222.21	102.34	167.27	128.61	60.6	81.58	93.96	146.22	141.25	136.29	108.18	137.48	98.36	gene=Cs9g03120 CDS=245-1285	K07374|1|0.0|636|cic:CICLE_v10015224mg|tubulin alpha	GO:0043234//protein complex;GO:0015630//microtubule cytoskeleton;GO:0030312//external encapsulating structure;GO:0044444//cytoplasmic part;GO:0043234//protein complex;GO:0015630//microtubule cytoskeleton;GO:0030312//external encapsulating structure;GO:0044444//cytoplasmic part	GO:0017111//nucleoside-triphosphatase activity;GO:0032561//guanyl ribonucleotide binding;GO:0017111//nucleoside-triphosphatase activity;GO:0032561//guanyl ribonucleotide binding	GO:0010038//response to metal ion;GO:0043623//cellular protein complex assembly;GO:0009207;GO:0007017//microtubule-based process;GO:0010038//response to metal ion;GO:0043623//cellular protein complex assembly;GO:0009207;GO:0007017//microtubule-based process	gi|567906567|ref|XP_006445597.1|/0/hypothetical protein CICLE_v10015224mg [Citrus clementina]
Cs4g11150	Cs4g11150.1,Cs4g11150.2,Cs4g11150.3	252.01	310.23	262.76	4972.33	253.63	226.86	218.43	216.45	218.97	337.4	431.84	392.52	171.07	138.13	161.43	149.55	131.93	135.21	gene=Cs4g11150 CDS=80-1453	K08770|1|0.0|1028|jcu:105634824|ubiquitin C	GO:0043231//intracellular membrane-bounded organelle	-	GO:0043412//macromolecule modification;GO:0010033//response to organic substance;GO:0032502//developmental process	gi|697128365|ref|XP_009618235.1|/0/PREDICTED: polyubiquitin-like isoform X1 [Nicotiana tomentosiformis]
Cs8g20210	Cs8g20210.1,Cs8g20210.2	251.15	255.52	240.22	4972.33	276.27	300.41	167.56	244.01	198.98	189.09	207.3	213.61	215.86	209.98	202.07	180.26	207.73	194.29	gene=Cs8g20210 CDS=246-845	K01802|1|7e-82|305|tcc:TCM_041621|peptidylprolyl isomerase [EC:5.2.1.8]	-	GO:0016859//cis-trans isomerase activity;GO:0016859//cis-trans isomerase activity	GO:0044267//cellular protein metabolic process;GO:0044267//cellular protein metabolic process	gi|568870682|ref|XP_006488528.1|/2.74791e-104/PREDICTED: peptidyl-prolyl cis-trans isomerase CYP20-1-like [Citrus sinensis]
Cs1g20150	Cs1g20150.1	249.82	157.43	227.59	4972.33	188.05	280.74	215.79	175.94	215.67	279.57	508.87	742.81	176.57	180.13	134.22	222.19	192.61	266.54	gene=Cs1g20150 CDS=389-922	-	-	-	-	gi|568823769|ref|XP_006466281.1|/7.78146e-17/PREDICTED: extensin-like [Citrus sinensis]
Cs4g13870	Cs4g13870.1	249.7	93.04	276.85	4972.33	175.2	198.76	1549.61	440.61	1216.11	1456.57	958.03	1031.97	732.02	885.58	538.78	1813.29	700.97	1714.75	gene=Cs4g13870 CDS=382-1314	K05933|1|1e-180|633|cic:CICLE_v10008993mg|aminocyclopropanecarboxylate oxidase [EC:1.14.17.4]	-	GO:0016641//oxidoreductase activity, acting on the CH-NH2 group of donors, oxygen as acceptor	GO:0008152//metabolic process	gi|567918868|ref|XP_006451440.1|/7.82916e-180/hypothetical protein CICLE_v10008993mg [Citrus clementina]
Cs6g01310	Cs6g01310.1,Cs6g01310.2	248.42	224.68	260.06	4972.33	221.13	255.01	77.44	185.11	111.92	51.69	177.13	246.77	68.18	62.13	52.15	34.91	51.03	27.98	gene=Cs6g01310 CDS=43-1224	K00789|1|0.0|771|cic:CICLE_v10011912mg|S-adenosylmethionine synthetase [EC:2.5.1.6]	GO:0044424;GO:0044424	GO:0046872//metal ion binding;GO:0016765//transferase activity, transferring alkyl or aryl (other than methyl) groups;GO:0032559;GO:0046872//metal ion binding;GO:0016765//transferase activity, transferring alkyl or aryl (other than methyl) groups;GO:0032559	GO:0044237//cellular metabolic process;GO:0044237//cellular metabolic process	gi|567871357|ref|XP_006428268.1|/0/hypothetical protein CICLE_v10011912mg [Citrus clementina]
Cs1g16550	Cs1g16550.1	248.12	105.83	183.27	4972.33	210.22	235.38	28.27	129.85	108.08	21.41	48.7	100.33	155.07	117.94	126.06	122.19	221.99	149.8	gene=Cs1g16550 CDS=84-1838	K01051|1|0.0|1079|cic:CICLE_v10025238mg|pectinesterase [EC:3.1.1.11]	GO:0030312//external encapsulating structure	GO:0030234//enzyme regulator activity	GO:0071555//cell wall organization;GO:0045229//external encapsulating structure organization	gi|57014097|sp|P83948.1|PME3_CITSI/0/RecName: Full=Pectinesterase 3; Short=PE 3; AltName: Full=Pectin methylesterase 3; Flags: Precursor [Citrus sinensis]
Cs1g20000	Cs1g20000.1,Cs1g20000.2	248.1	343.33	275.74	4972.33	291.08	213.87	862.95	439.12	672.12	822.96	551.1	504.74	251.86	279.93	254.69	355.94	361.39	401.11	gene=Cs1g20000 CDS=1138-2154	K09338|1|6e-142|504|cit:102626051|homeobox-leucine zipper protein	-	-	-	gi|568823747|ref|XP_006466270.1|/9.02033e-154/PREDICTED: homeobox-leucine zipper protein ATHB-6-like [Citrus sinensis]
Cs7g29010	Cs7g29010.1	247.88	213.76	250.45	4972.33	316.66	297.68	207.95	446.21	211.69	132.98	251.01	238.23	252.19	259.05	262.91	146.86	246.75	231.76	gene=Cs7g29010 CDS=319-2265	K03283|1|0.0|1172|cic:CICLE_v10030928mg|heat shock 70kDa protein 1/8;K06758|1|0.0|1172|cic:CICLE_v10030928mg|L1 cell adhesion molecule like protein	-	GO:0016628//oxidoreductase activity, acting on the CH-CH group of donors, NAD or NADP as acceptor;GO:0032559	GO:0008152//metabolic process;GO:0050896//response to stimulus	gi|567886976|ref|XP_006436010.1|/0/hypothetical protein CICLE_v10030928mg [Citrus clementina]
Cs8g08320	Cs8g08320.1,Cs8g08320.2	247.75	292.85	244.46	4972.33	252.33	248.14	143.66	236.11	228.44	149.36	208.81	200.53	373.37	376.99	420.72	336.98	270.78	338.29	gene=Cs8g08320 CDS=84-947	K01373|1|2e-155|549|cit:102620490|cathepsin F [EC:3.4.22.41]	-	GO:0004175//endopeptidase activity;GO:0004175//endopeptidase activity	GO:0019538//protein metabolic process;GO:0019538//protein metabolic process	gi|568868060|ref|XP_006487337.1|/1.38232e-154/PREDICTED: cysteine proteinase RD19a-like [Citrus sinensis]
Cs2g16040	Cs2g16040.1	247.73	364.97	296.25	4972.33	318.21	246.44	274.23	541.78	392.6	228.93	517.65	214.87	268.7	207.61	256.94	210.27	271.34	215.53	gene=Cs2g16040 CDS=14-1102	K16040|1|9e-139|494|vvi:100233030|trans-resveratrol di-O-methyltransferase [EC:2.1.1.240];K13262|2|2e-109|396|vvi:100243529|isoflavone-7-O-methyltransferase [EC:2.1.1.150];K13259|4|5e-94|345|cam:101495151|2,7,4'-trihydroxyisoflavanone 4'-O-methyltransferase / isoflavone 4'-O-methyltransferase [EC:2.1.1.212 2.1.1.46]	-	GO:0005515//protein binding;GO:0008171//O-methyltransferase activity	GO:0006730//one-carbon metabolic process	gi|568829651|ref|XP_006469135.1|/0/PREDICTED: trans-resveratrol di-O-methyltransferase-like [Citrus sinensis]
Cs6g18590	Cs6g18590.1	247.05	169.2	225.51	4972.33	238.92	316.79	352.41	316.19	292.47	317.4	245.26	237.44	462.15	459.26	436.03	376.78	407.72	394.88	gene=Cs6g18590 CDS=129-704	K02993|1|3e-103|375|cic:CICLE_v10012856mg|small subunit ribosomal protein S7e	GO:0030529//intracellular ribonucleoprotein complex	GO:0005198//structural molecule activity	GO:0010467//gene expression	gi|567876357|ref|XP_006430768.1|/1.90863e-102/hypothetical protein CICLE_v10012856mg [Citrus clementina]
Cs7g25610	Cs7g25610.1,Cs7g25610.2	246.15	188.99	228.72	4972.33	239.5	209.5	78.37	203.03	233.77	52.95	83.71	85.97	1351.1	1436.72	1047.39	303.32	354.38	262.79	gene=Cs7g25610 CDS=251-871	K09872|1|2e-104|380|cic:CICLE_v10032302mg|aquaporin PIP	GO:0031224//intrinsic component of membrane;GO:0031224//intrinsic component of membrane	-	GO:0006810//transport;GO:0006810//transport	gi|641825445|gb|KDO44716.1|/5.41807e-169/hypothetical protein CISIN_1g0196812mg [Citrus sinensis]
Cs6g15230	Cs6g15230.1	245.59	232.55	245.36	4972.33	243.28	261.14	177.58	217.64	187.86	96.14	118.66	136.97	180.24	163	166.23	149.56	179.88	135.04	gene=Cs6g15230 CDS=138-1442	K08232|1|0.0|823|cit:102612075|monodehydroascorbate reductase (NADH) [EC:1.6.5.4]	-	GO:0050662//coenzyme binding;GO:0003824//catalytic activity	GO:0008152//metabolic process	gi|568856499|ref|XP_006481820.1|/0/PREDICTED: monodehydroascorbate reductase, seedling isozyme-like [Citrus sinensis]
orange1.1t05825	orange1.1t05825.1	244.6	202.42	195.91	4972.33	227.18	172.6	15.96	24.09	14.7	1.11	2.24	4.48	8.2	6.97	10.68	5.99	7.19	3.53	gene=orange1.1t05825 CDS=1-177	-	-	-	-	-
orange1.1t00226	orange1.1t00226.1,orange1.1t00226.2,orange1.1t00226.3,orange1.1t00226.4	244.53	206.08	223.72	4972.33	190.26	216.91	64.51	148.9	104.5	54.11	67.47	74.6	136.65	125.43	117.16	93.17	143.99	90.22	gene=orange1.1t00226 CDS=177-1811	K00615|1|0.0|1037|cic:CICLE_v10018991mg|transketolase [EC:2.2.1.1]	-	GO:0016744;GO:0016744;GO:0016744;GO:0016744	-	gi|567905578|ref|XP_006445277.1|/0/hypothetical protein CICLE_v10018991mg [Citrus clementina]
Cs8g04980	Cs8g04980.1,Cs8g04980.2	243.97	257.36	239.8	4972.33	210.12	185.82	209.53	219.4	201.15	141.56	142.51	154.39	282.22	321.16	333.74	278.47	221.41	238.74	gene=Cs8g04980 CDS=233-1129	K00083|1|6e-148|524|cit:102607276|cinnamyl-alcohol dehydrogenase [EC:1.1.1.195]	-	GO:0046914//transition metal ion binding;GO:0016491//oxidoreductase activity;GO:0046914//transition metal ion binding;GO:0016491//oxidoreductase activity	GO:0008152//metabolic process;GO:0008152//metabolic process	gi|567860546|ref|XP_006422927.1|/4.10639e-150/hypothetical protein CICLE_v10028651mg [Citrus clementina]
orange1.1t03290	orange1.1t03290.1,orange1.1t03290.2	243.59	205.8	240.49	4972.33	254.31	292.08	251.88	211.34	195.98	236.56	185.47	197.39	219.78	220.65	238.87	189.75	203.95	215.23	gene=orange1.1t03290 CDS=190-810	K02872|1|2e-106|386|cic:CICLE_v10005900mg|large subunit ribosomal protein L13Ae	GO:0030529//intracellular ribonucleoprotein complex;GO:0030529//intracellular ribonucleoprotein complex	GO:0005198//structural molecule activity;GO:0005198//structural molecule activity	GO:0010467//gene expression;GO:0010467//gene expression	gi|567855559|ref|XP_006420899.1|/1.10352e-105/hypothetical protein CICLE_v10005900mg [Citrus clementina]
Cs4g15590	Cs4g15590.1	243.4	353.86	275.07	4972.33	325.73	351.94	130.33	131.75	166.3	218.02	163.43	171.4	110.87	96.09	120.1	217.85	101.73	178.93	gene=Cs4g15590 CDS=294-536	K16865|1|3e-06|52.8|cre:CHLREDRAFT_192147|programmed cell death protein 4	-	-	-	gi|567918634|ref|XP_006451323.1|/4.29633e-41/hypothetical protein CICLE_v10010071mg [Citrus clementina]
Cs9g05030	Cs9g05030.1,Cs9g05030.2,Cs9g05030.3	243.16	145.49	227.83	4972.33	223.4	322.06	82.96	162.24	124.91	87.49	86.18	89.36	171.12	142.58	136.15	97.41	140.67	112.06	gene=Cs9g05030 CDS=285-704	-	-	-	-	gi|567853047|ref|XP_006419687.1|/8.70449e-40/hypothetical protein CICLE_v10006180mg [Citrus clementina]
Cs4g04530	Cs4g04530.1	242.54	109.79	170.59	4972.33	105.62	134.29	318.3	294.7	375.22	201.07	249.92	260.81	243.25	304.72	166.1	250.8	129.57	262.89	gene=Cs4g04530 CDS=1-1611	K00487|1|0.0|959|cit:102577934|trans-cinnamate 4-monooxygenase [EC:1.14.13.11]	-	GO:0016709//oxidoreductase activity, acting on paired donors, with incorporation or reduction of molecular oxygen, NAD(P)H as one donor, and incorporation of one atom of oxygen;GO:0005506//iron ion binding	GO:0008152//metabolic process	gi|572152969|ref|NP_001275769.1|/0/cinnamate 4-hydroxylase CYP73 [Citrus sinensis]
Cs7g01810	Cs7g01810.1	241.94	217.3	216.67	4972.33	239.21	243.46	126.19	184.88	152.07	117.01	112.17	139.42	150.12	136.62	126.56	115.63	148.44	110.04	gene=Cs7g01810 CDS=213-926	K02137|1|1e-105|384|cic:CICLE_v10032620mg|F-type H+-transporting ATPase subunit O	GO:0044424;GO:0016020//membrane	-	GO:0006810//transport	gi|567893205|ref|XP_006439123.1|/6.10028e-105/hypothetical protein CICLE_v10032620mg [Citrus clementina]
Cs2g15250	Cs2g15250.1,Cs2g15250.2	240.8	187.02	243.37	4972.33	258.88	328.01	87.83	89.94	69.95	75.14	60.55	50	103.83	99.55	82.89	72.64	83.92	66.51	gene=Cs2g15250 CDS=140-688	K02868|1|6e-87|321|cic:CICLE_v10016875mg|large subunit ribosomal protein L11e	GO:0030529//intracellular ribonucleoprotein complex;GO:0030529//intracellular ribonucleoprotein complex	GO:0005198//structural molecule activity;GO:0005198//structural molecule activity	GO:0010467//gene expression;GO:0010467//gene expression	gi|567909013|ref|XP_006446820.1|/3.3246e-86/hypothetical protein CICLE_v10016875mg [Citrus clementina]
Cs4g18820	Cs4g18820.1	239.59	260.84	252.36	4972.33	290.57	295.91	238.49	194.67	217.54	233.96	212.3	248.79	272.28	303.23	350.02	240.92	347.53	305.51	gene=Cs4g18820 CDS=1-198	-	-	-	-	-
Cs5g12110	Cs5g12110.1,Cs5g12110.2,Cs5g12110.3	239.01	159.12	214.55	4972.33	202.25	283.39	37	97.56	70.32	33.45	27.22	53.42	143	130.35	117.35	102.13	131.84	95.16	gene=Cs5g12110 CDS=144-515	K18635|1|1e-30|132|cic:CICLE_v10022881mg|protein SPIRAL1 and related proteins	-	-	-	gi|567896588|ref|XP_006440782.1|/6.33228e-46/hypothetical protein CICLE_v10022881mg [Citrus clementina]
Cs5g20720	Cs5g20720.1,Cs5g20720.2	238.97	157.33	210.61	4972.33	222.11	300.04	195.19	204.19	159.3	155.44	97.91	109.78	299.1	281.1	250.45	211.84	280.45	186.83	gene=Cs5g20720 CDS=96-590	K02896|1|2e-73|276|cic:CICLE_v10023969mg|large subunit ribosomal protein L24e	GO:0030529//intracellular ribonucleoprotein complex;GO:0030529//intracellular ribonucleoprotein complex	GO:0005198//structural molecule activity;GO:0005198//structural molecule activity	GO:0010467//gene expression;GO:0010467//gene expression	gi|567898924|ref|XP_006441950.1|/2.04947e-56/hypothetical protein CICLE_v10023969mg, partial [Citrus clementina]
Cs5g04830	Cs5g04830.1	238.23	211.48	241.45	4972.33	243.27	260.94	143.96	179.93	168.35	171.41	161.01	179.49	127.81	108.93	98.52	111.89	85.35	100.43	gene=Cs5g04830 CDS=454-720	K03355|1|3e-07|57.8|cic:CICLE_v10019469mg|anaphase-promoting complex subunit 8	-	-	-	gi|567894478|ref|XP_006439727.1|/1.40674e-44/hypothetical protein CICLE_v10023087mg [Citrus clementina]
Cs1g26330	Cs1g26330.1	238.04	130.1	323.18	4972.33	170.25	333.97	52.49	251.86	131.98	72.55	141.43	167.8	103.04	83.49	75.5	50.75	62.15	67.22	gene=Cs1g26330 CDS=107-1096	K01183|1|0.0|635|cic:CICLE_v10026057mg|chitinase [EC:3.2.1.14]	-	-	GO:0005975//carbohydrate metabolic process;GO:0043170;GO:0009056//catabolic process	gi|567865383|ref|XP_006425314.1|/1.25845e-180/hypothetical protein CICLE_v10026057mg [Citrus clementina]
Cs1g22240	Cs1g22240.1,Cs1g22240.2	237.39	271.48	319.66	4972.33	229.16	221.48	674.1	362.88	614.51	902.32	579.15	476.35	495.05	439.9	471.46	696.76	477.49	670.44	gene=Cs1g22240 CDS=143-541	-	-	-	-	gi|568824298|ref|XP_006466539.1|/6.98569e-100/PREDICTED: uncharacterized protein LOC102625103 [Citrus sinensis]
Cs9g10450	Cs9g10450.1	236.78	277.43	290.62	4972.33	254.59	259.35	147.99	157.87	133.57	229.88	208.45	188.47	207.2	171.98	166.23	296.01	246.96	371.6	gene=Cs9g10450 CDS=217-900	K00799|1|1e-119|430|cit:102607202|glutathione S-transferase [EC:2.5.1.18]	-	-	-	gi|568873184|ref|XP_006489730.1|/6.90569e-119/PREDICTED: probable glutathione S-transferase-like [Citrus sinensis]
Cs2g16135	Cs2g16135.1	236.62	163.62	326.14	4972.33	185.97	186.63	773.35	236.79	694.66	1677.88	551.64	576.89	130.43	142.15	124.06	341.82	114.06	354.57	gene=Cs2g16135 CDS=342-1030	-	-	-	-	gi|641830474|gb|KDO49561.1|/9.56006e-91/hypothetical protein CISIN_1g025469mg [Citrus sinensis]
Cs2g15550	Cs2g15550.1,Cs2g15550.2,Cs2g15550.3,Cs2g15550.4	236.32	264.1	240.07	4972.33	256.04	265.09	133.46	151.62	129.99	91.97	102.35	114.6	137.71	137.11	166.76	169.35	175.75	169.49	gene=Cs2g15550 CDS=89-889	K06630|1|9e-139|494|cit:102608475|14-3-3 protein epsilon	-	GO:0005515//protein binding;GO:0005515//protein binding;GO:0005515//protein binding;GO:0005515//protein binding	-	gi|568829418|ref|XP_006469020.1|/5.26233e-138/PREDICTED: 14-3-3-like protein D-like isoform X1 [Citrus sinensis]
Cs8g09580	Cs8g09580.1,Cs8g09580.2	235.67	304.32	253.88	4972.33	306.69	212.66	654.9	560.19	650.89	217.19	376.66	179.96	251.25	310.64	255.34	148.73	142.79	98.73	gene=Cs8g09580 CDS=125-2407	K01595|1|0.0|1421|cit:102608170|phosphoenolpyruvate carboxylase [EC:4.1.1.31]	-	GO:0046872//metal ion binding;GO:0004611//phosphoenolpyruvate carboxykinase activity;GO:0016628//oxidoreductase activity, acting on the CH-CH group of donors, NAD or NADP as acceptor;GO:0046872//metal ion binding;GO:0004611//phosphoenolpyruvate carboxykinase activity;GO:0016628//oxidoreductase activity, acting on the CH-CH group of donors, NAD or NADP as acceptor	GO:0071704//organic substance metabolic process;GO:0009060//aerobic respiration;GO:0043648//dicarboxylic acid metabolic process;GO:0071704//organic substance metabolic process;GO:0009060//aerobic respiration;GO:0043648//dicarboxylic acid metabolic process	gi|568868314|ref|XP_006487452.1|/0/PREDICTED: phosphoenolpyruvate carboxylase, housekeeping isozyme-like isoform X1 [Citrus sinensis]
Cs7g05220	Cs7g05220.1	235.58	160.28	191.04	4972.33	200.48	231.08	73.49	142.84	106.25	58.3	63.36	91.85	185.64	197.38	172.66	141.15	174.91	135.31	gene=Cs7g05220 CDS=223-1278	K15280|1|2e-23|111|fve:101315449|solute carrier family 35, member C2	GO:0031224//intrinsic component of membrane	-	-	gi|568859650|ref|XP_006483350.1|/7.4183e-177/PREDICTED: probable sugar phosphate/phosphate translocator At5g25400-like [Citrus sinensis]
Cs5g28400	Cs5g28400.1	235.41	285.42	248.34	4972.33	182.14	187.12	932.46	1015.29	1181.5	846.93	1293.83	1013.7	927.29	799.75	819.13	1262.06	837.98	1187.98	gene=Cs5g28400 CDS=553-1038	-	-	GO:0005506//iron ion binding;GO:0022892	GO:0015669;GO:0071941	gi|567860986|ref|XP_006423147.1|/7.30777e-85/hypothetical protein CICLE_v10029451mg [Citrus clementina]
Cs2g10390	Cs2g10390.1	235.3	170.49	211.42	4972.33	116.83	331.96	8.65	60.25	59.22	13.3	34.08	79.99	99.85	57.83	71.05	58.64	44.93	47.57	gene=Cs2g10390 CDS=88-690	-	GO:0016020//membrane	-	-	gi|568828115|ref|XP_006468390.1|/1.86402e-98/PREDICTED: CASP-like protein POPTRDRAFT_798217-like [Citrus sinensis]
Cs2g03540	Cs2g03540.1,Cs2g03540.2	234.92	161.4	211.07	4972.33	220.89	271.06	366.32	329.7	286.31	315.9	243.57	254.65	382.48	364.32	327.1	255.69	300.33	259.68	gene=Cs2g03540 CDS=8-451	K02882|1|1e-73|276|cic:CICLE_v10016900mg|large subunit ribosomal protein L18Ae	GO:0030529//intracellular ribonucleoprotein complex;GO:0030529//intracellular ribonucleoprotein complex	GO:0005198//structural molecule activity;GO:0005198//structural molecule activity	GO:0010467//gene expression;GO:0010467//gene expression	gi|568826250|ref|XP_006467486.1|/7.3616e-73/PREDICTED: 60S ribosomal protein L18a-2-like isoform X2 [Citrus sinensis]
orange1.1t02043	orange1.1t02043.1	234.67	339.02	329.5	4972.33	199.96	192.63	68.37	191.2	104.11	62.76	121.72	112.84	240.92	201.43	136.78	120.42	164.74	86.92	gene=orange1.1t02043 CDS=129-1178	K00430|1|2e-163|576|cit:102615475|peroxidase [EC:1.11.1.7]	-	-	-	gi|568879462|ref|XP_006492677.1|/1.03191e-162/PREDICTED: peroxidase 15-like [Citrus sinensis]
Cs1g22050	Cs1g22050.1	234.27	107.98	157.55	4972.33	175.55	236.26	12.72	58.99	58.42	15.5	35.88	84.77	106.67	96.31	94.91	90.75	150.45	102.86	gene=Cs1g22050 CDS=72-842	-	-	-	-	-
Cs7g01960	Cs7g01960.1	233.99	128.51	215.74	4972.33	220.2	283.33	68.28	70.79	48.9	42.7	29.23	41.3	45.58	44.38	41.41	33.76	37.89	27.68	gene=Cs7g01960 CDS=122-487	K02910|1|2e-50|200|cit:102625183|large subunit ribosomal protein L31e	GO:0030529//intracellular ribonucleoprotein complex	GO:0005198//structural molecule activity	GO:0010467//gene expression	gi|568858743|ref|XP_006482903.1|/1.30647e-49/PREDICTED: 60S ribosomal protein L31-like [Citrus sinensis]
Cs5g34390	Cs5g34390.1	233.51	253.06	238.11	4972.33	232.68	197.24	593.95	82.41	304.83	641.03	298.49	198.99	106.8	137.89	117.47	225.7	88.43	227.99	gene=Cs5g34390 CDS=60-689	-	-	-	-	gi|568853001|ref|XP_006480157.1|/5.08839e-97/PREDICTED: uncharacterized protein LOC102615817 [Citrus sinensis]
Cs9g02230	Cs9g02230.1,Cs9g02230.2,Cs9g02230.3,Cs9g02230.4,Cs9g02230.5	233.43	144.1	211.16	4972.33	160.02	227.53	38.96	104.52	89.6	29.16	46.71	74.02	89.57	91.89	91.94	85.34	123.06	78.77	gene=Cs9g02230 CDS=251-1756	K01648|1|0.0|954|cit:102618571|ATP citrate (pro-S)-lyase [EC:2.3.3.8]	-	GO:0046912//transferase activity, transferring acyl groups, acyl groups converted into alkyl on transfer;GO:0004774//succinate-CoA ligase activity;GO:0046912//transferase activity, transferring acyl groups, acyl groups converted into alkyl on transfer;GO:0004774//succinate-CoA ligase activity;GO:0046912//transferase activity, transferring acyl groups, acyl groups converted into alkyl on transfer;…	GO:0005975//carbohydrate metabolic process;GO:0005975//carbohydrate metabolic process;GO:0005975//carbohydrate metabolic process;GO:0005975//carbohydrate metabolic process;GO:0005975//carbohydrate metabolic process	gi|641853081|gb|KDO71940.1|/0/hypothetical protein CISIN_1g007327mg [Citrus sinensis]
Cs5g12510	Cs5g12510.1,Cs5g12510.2,Cs5g12510.3,Cs5g12510.4	232.86	270.11	217.66	4972.33	261.49	285.54	185.05	274.79	253.07	280.96	269.91	270.44	328.02	285.66	308.91	353.31	355.23	363.11	gene=Cs5g12510 CDS=929-1282	K03627|1|4e-43|176|cit:102624312|putative transcription factor	GO:0031981//nuclear lumen;GO:0031981//nuclear lumen	GO:0003712//transcription cofactor activity;GO:0003677//DNA binding;GO:0003712//transcription cofactor activity;GO:0003677//DNA binding;GO:0003677//DNA binding;GO:0003677//DNA binding	GO:0009725//response to hormone;GO:0006355//regulation of transcription, DNA-templated;GO:0009725//response to hormone;GO:0006355//regulation of transcription, DNA-templated	gi|568847870|ref|XP_006477754.1|/5.075e-66/PREDICTED: multiprotein-bridging factor 1b-like [Citrus sinensis]
Cs9g19210	Cs9g19210.1	231.25	258.73	225.58	4972.33	288	421.76	37.04	134.67	187.76	182	205.54	180.53	147.98	118.01	113.9	72.65	74.47	102.92	gene=Cs9g19210 CDS=1-405	K02947|1|1e-25|114|cic:CICLE_v10006024mg|small subunit ribosomal protein S10e	GO:0030529//intracellular ribonucleoprotein complex	-	-	gi|641837851|gb|KDO56800.1|/9.20088e-25/hypothetical protein CISIN_1g029742mg [Citrus sinensis]
orange1.1t03286	orange1.1t03286.1	230.87	110.36	275.79	4972.33	142.63	211.98	342.9	122.84	284.23	546.25	221.49	354.89	214.2	254.48	132.51	427.51	207.49	368.47	gene=orange1.1t03286 CDS=1-408	K10534|1|1e-16|86.3|vcn:VOLCADRAFT_76569|nitrate reductase (NAD(P)H) [EC:1.7.1.1 1.7.1.2 1.7.1.3]	-	GO:0008940//nitrate reductase activity;GO:0005506//iron ion binding	GO:0008152//metabolic process	gi|567855547|ref|XP_006420893.1|/3.6871e-74/hypothetical protein CICLE_v10006192mg [Citrus clementina]
Cs7g09180	Cs7g09180.1	230.77	116.14	190.05	4972.33	195.62	284.97	113.31	180.32	135.76	117.23	85.77	96.58	199.63	216.54	151.22	127.78	157.53	121.88	gene=Cs7g09180 CDS=210-650	K02900|1|1e-82|307|cit:102609777|large subunit ribosomal protein L27Ae	GO:0030529//intracellular ribonucleoprotein complex	GO:0005198//structural molecule activity	GO:0010467//gene expression	gi|568860859|ref|XP_006483931.1|/6.9612e-82/PREDICTED: 60S ribosomal protein L27a-3-like [Citrus sinensis]
Cs9g10140	Cs9g10140.1,Cs9g10140.2	230.6	135.24	219.61	4972.33	231.45	288.27	210.25	202.51	173.53	140.86	118.61	128.83	288.89	275.37	240.2	208.52	232.22	196.35	gene=Cs9g10140 CDS=731-1114	K02875|1|2e-43|177|cic:CICLE_v10006195mg|large subunit ribosomal protein L14e	GO:0030529//intracellular ribonucleoprotein complex;GO:0005622//intracellular	GO:0005198//structural molecule activity	GO:0010467//gene expression	gi|567854287|ref|XP_006420263.1|/1.05547e-42/hypothetical protein CICLE_v10006195mg [Citrus clementina]
Cs7g15540	Cs7g15540.1	229.8	383.86	280.34	4972.33	239.64	191.23	55	162.66	111.65	32.33	89.76	78.28	42.54	36.38	48.37	46.89	82.99	36.52	gene=Cs7g15540 CDS=1-1566	K00517|1|4e-119|429|osa:4349111|	-	GO:0004497//monooxygenase activity;GO:0005506//iron ion binding	-	gi|568862484|ref|XP_006484713.1|/0/PREDICTED: cytochrome P450 89A2-like [Citrus sinensis]
Cs5g20540	Cs5g20540.1	229.75	225.49	230.62	4972.33	224.43	252.12	141.77	175.74	146.34	93.3	111.03	119.65	141.64	141.29	142.77	138.83	152.47	130.92	gene=Cs5g20540 CDS=221-1555	K17255|1|0.0|873|cit:102625537|Rab GDP dissociation inhibitor	-	GO:0005092//GDP-dissociation inhibitor activity	GO:0006810//transport;GO:0033124	gi|568849499|ref|XP_006478491.1|/0/PREDICTED: rab GDP dissociation inhibitor alpha-like [Citrus sinensis]
Cs8g02310	Cs8g02310.1,Cs8g02310.2,Cs8g02310.3,Cs8g02310.4,Cs8g02310.5,Cs8g02310.6	228.81	208.36	206.61	4972.33	205.06	187.16	373.91	334.93	340.21	330.5	313.25	314.65	212.26	230.55	236.09	217.14	196.3	215.02	gene=Cs8g02310 CDS=135-1415	K02147|1|0.0|756|cic:CICLE_v10028070mg|V-type H+-transporting ATPase subunit B	GO:0033176//proton-transporting V-type ATPase complex;GO:0033176//proton-transporting V-type ATPase complex;GO:0033176//proton-transporting V-type ATPase complex	GO:0015078//hydrogen ion transmembrane transporter activity;GO:0019829//cation-transporting ATPase activity;GO:0032559;GO:0015078//hydrogen ion transmembrane transporter activity;GO:0019829//cation-transporting ATPase activity;GO:0032559;GO:0015078//hydrogen ion transmembrane transporter activity;GO:0019829//cation-transporting ATPase activity;GO:0032559	GO:0009205;GO:0015988//energy coupled proton transmembrane transport, against electrochemical gradient;GO:0015986//ATP synthesis coupled proton transport;GO:0015988//energy coupled proton transmembrane transport, against electrochemical gradient;GO:0009205;GO:0015988//energy coupled proton transmembrane transport, against electrochemical gradient	gi|567859772|ref|XP_006422540.1|/0/hypothetical protein CICLE_v10028070mg [Citrus clementina]
Cs6g01210	Cs6g01210.1,Cs6g01210.2,Cs6g01210.3,Cs6g01210.4,Cs6g01210.5	228.74	168.53	202.39	4972.33	151.16	241.43	44.02	118.15	94.31	30.9	44.9	69.56	67.74	52.93	60.27	60.31	62.28	55.97	gene=Cs6g01210 CDS=76-1065	K01648|1|0.0|830|cit:102608248|ATP citrate (pro-S)-lyase [EC:2.3.3.8]	-	GO:0004774//succinate-CoA ligase activity;GO:0032559;GO:0004774//succinate-CoA ligase activity;GO:0032559;GO:0004774//succinate-CoA ligase activity;GO:0032559;GO:0004774//succinate-CoA ligase activity;GO:0032559;GO:0004774//succinate-CoA ligase activity;GO:0032559	-	gi|568853291|ref|XP_006480297.1|/0/PREDICTED: ATP-citrate synthase alpha chain protein 2-like [Citrus sinensis]
Cs8g04040	Cs8g04040.1	228.47	231.23	225.6	4972.33	197.79	258.94	49.98	99.9	93.55	70.49	111.12	142.73	177.65	145.7	184.28	151.77	133.73	149.04	gene=Cs8g04040 CDS=357-656	-	-	-	-	gi|641838984|gb|KDO57920.1|/7.66361e-40/hypothetical protein CISIN_1g046657mg [Citrus sinensis]
Cs5g03890	Cs5g03890.1	227.65	159.67	195.19	4972.33	218.2	299.42	193.05	245.27	209.79	215.22	163.23	182.47	330.85	286.06	249.45	241.4	260.69	247.24	gene=Cs5g03890 CDS=117-479	K02915|1|1e-48|193|cit:102618427|large subunit ribosomal protein L34e	GO:0030529//intracellular ribonucleoprotein complex	GO:0005198//structural molecule activity	GO:0010467//gene expression	gi|567894216|ref|XP_006439596.1|/5.7167e-48/hypothetical protein CICLE_v10022900mg [Citrus clementina]
Cs3g19460	Cs3g19460.1	227.54	469.57	279	4972.33	214.94	171.06	495.58	305.17	339.35	143.06	159.91	156.58	420.46	482.8	386.58	305.52	293.87	238.91	gene=Cs3g19460 CDS=66-1229	K01623|1|4e-61|236|pda:103722777|fructose-bisphosphate aldolase, class I [EC:4.1.2.13];K02940|2|3e-51|203|sita:101773010|large subunit ribosomal protein L9e	GO:0044464	-	-	gi|568837489|ref|XP_006472756.1|/0/PREDICTED: WAT1-related protein At1g21890-like [Citrus sinensis]
Cs5g15920	Cs5g15920.1,Cs5g15920.2	227.01	172.69	209.17	4972.33	217.7	216.3	214.36	201.74	203.29	180.35	182.01	148.82	161.65	163.08	172.92	147.44	130.38	142.15	gene=Cs5g15920 CDS=522-3053	K03234|1|0.0|1691|cit:102616295|elongation factor 2	-	GO:0017111//nucleoside-triphosphatase activity;GO:0008135//translation factor activity, RNA binding;GO:0032561//guanyl ribonucleotide binding;GO:0017111//nucleoside-triphosphatase activity;GO:0008135//translation factor activity, RNA binding;GO:0032561//guanyl ribonucleotide binding	GO:0006412//translation;GO:0009207;GO:0006412//translation;GO:0009207	gi|568848512|ref|XP_006478052.1|/0/PREDICTED: elongation factor 2-like [Citrus sinensis]
Cs8g10790	Cs8g10790.1,Cs8g10790.2,Cs8g10790.3	226.6	277.9	228.23	4972.33	202.67	199.56	323.49	341.53	309.1	209.73	208.69	191.35	259.29	260.08	237.25	194.16	208.98	172.33	gene=Cs8g10790 CDS=212-1156	K00616|1|2e-176|538|cit:102622193|transaldolase [EC:2.2.1.2]	GO:0044424;GO:0044424;GO:0044424	GO:0016744;GO:0016744;GO:0016744	GO:0006007//glucose catabolic process;GO:0006007//glucose catabolic process;GO:0006007//glucose catabolic process	gi|568868572|ref|XP_006487560.1|/1.36682e-175/PREDICTED: uncharacterized protein LOC102622193 [Citrus sinensis]
Cs5g02720	Cs5g02720.1	226.58	229.86	215.43	4972.33	183.39	183.66	103.26	139.95	120.22	80.95	90.5	89.67	126.54	111.91	101.37	96.08	100.82	97.28	gene=Cs5g02720 CDS=302-1786	K00033|1|0.0|988|cit:102626400|6-phosphogluconate dehydrogenase [EC:1.1.1.44 1.1.1.343]	-	GO:0016616//oxidoreductase activity, acting on the CH-OH group of donors, NAD or NADP as acceptor;GO:0048037//cofactor binding;GO:0000166//nucleotide binding	GO:0006007//glucose catabolic process	gi|568845163|ref|XP_006476447.1|/0/PREDICTED: 6-phosphogluconate dehydrogenase, decarboxylating 1, chloroplastic-like isoform X1 [Citrus sinensis]
Cs4g05780	Cs4g05780.1	226.57	229.7	177.98	4972.33	233.97	255.83	313.01	221.42	133.42	370	227.3	337.32	81.31	57.88	217.78	326.19	677.41	2081.79	gene=Cs4g05780 CDS=1-483	K13993|1|2e-70|264|cit:102606859|HSP20 family protein	-	-	-	gi|343887285|dbj|BAK61831.1|/8.61244e-70/heat shock protein [Citrus unshiu]
Cs3g08990	Cs3g08990.1	226.43	53.9	114.04	4972.33	97.18	204.16	0	24.03	30.01	3.3	3.05	31.23	6.53	2.58	6.61	2.94	1.02	1.51	gene=Cs3g08990 CDS=1-366	K02883|1|3e-15|80.5|zma:103646289|large subunit ribosomal protein L18e;K11855|2|2e-09|61.2|bvg:104906049|ubiquitin carboxyl-terminal hydrolase 36/42 [EC:3.4.19.12]	-	-	-	gi|567880283|ref|XP_006432700.1|/8.9172e-52/hypothetical protein CICLE_v10003352mg [Citrus clementina]
Cs5g33860	Cs5g33860.1,Cs5g33860.2	226.28	136.98	222.23	4972.33	202.31	244.27	136.99	227.49	157.58	71.1	93.23	129.71	220.04	216.05	176.12	130.78	182.44	129.47	gene=Cs5g33860 CDS=936-1895	K09584|1|3e-176|619|cit:102627665|protein disulfide-isomerase A6 [EC:5.3.4.1]	GO:0043231//intracellular membrane-bounded organelle;GO:0043231//intracellular membrane-bounded organelle	GO:0016862//intramolecular oxidoreductase activity, interconverting keto- and enol-groups;GO:0015036//disulfide oxidoreductase activity;GO:0016862//intramolecular oxidoreductase activity, interconverting keto- and enol-groups;GO:0015036//disulfide oxidoreductase activity	GO:0018904;GO:0019725//cellular homeostasis;GO:0018904;GO:0019725//cellular homeostasis	gi|641868375|gb|KDO87059.1|/0/hypothetical protein CISIN_1g018270mg [Citrus sinensis]
Cs9g05130	Cs9g05130.1	225.6	79.41	199.81	4972.33	130.17	265.7	6.63	85.79	112.45	16.6	29.73	91.28	141.87	99.86	120	87.39	67.4	81.13	gene=Cs9g05130 CDS=1-972	K00430|1|1e-174|612|cit:102619551|peroxidase [EC:1.11.1.7]	-	GO:0005506//iron ion binding;GO:0003824//catalytic activity;GO:0016209//antioxidant activity	GO:0008152//metabolic process;GO:0006950//response to stress	gi|568872215|ref|XP_006489267.1|/8.00732e-174/PREDICTED: peroxidase 3-like [Citrus sinensis]
Cs7g27470	Cs7g27470.1	224.31	193.8	212.03	4972.33	240.4	217.46	359.09	304.64	313.51	425.09	312.04	234.48	299.07	293.79	310.14	256.31	339.67	289.63	gene=Cs7g27470 CDS=1-2664	K03231|1|0.0|882|cic:CICLE_v10033471mg|elongation factor 1-alpha;K01939|4|0.0|869|cic:CICLE_v10031350mg|adenylosuccinate synthase [EC:6.3.4.4]	GO:0044424	GO:0016772//transferase activity, transferring phosphorus-containing groups;GO:0017111//nucleoside-triphosphatase activity;GO:0008135//translation factor activity, RNA binding;GO:0032561//guanyl ribonucleotide binding	GO:0006412//translation;GO:0009207	gi|641829358|gb|KDO48480.1|/0/hypothetical protein CISIN_1g0132372mg [Citrus sinensis]
Cs6g02690	Cs6g02690.1,Cs6g02690.2	224.22	263.25	245.71	4972.33	228.57	215.13	109.57	181	144.81	126.26	143.9	147.03	221.76	214.98	163.81	241.4	214.09	220.93	gene=Cs6g02690 CDS=92-766	K01823|1|2e-93|342|cic:CICLE_v10012312mg|isopentenyl-diphosphate delta-isomerase [EC:5.3.3.2]	-	GO:0043169//cation binding;GO:0016863//intramolecular oxidoreductase activity, transposing C=C bonds	GO:0006720//isoprenoid metabolic process;GO:0006779//porphyrin-containing compound biosynthetic process	gi|641835072|gb|KDO54054.1|/1.26539e-95/hypothetical protein CISIN_1g022053mg [Citrus sinensis]
Cs3g24730	Cs3g24730.1,Cs3g24730.2,Cs3g24730.3,Cs3g24730.4,Cs3g24730.5,Cs3g24730.6	223.99	259.67	268.05	4972.33	309.63	298.17	260.82	186.28	186.4	458.63	281.3	263.48	247.23	252.49	303.72	483.92	389.63	680.8	gene=Cs3g24730 CDS=1-447	-	-	-	-	gi|567884833|ref|XP_006434975.1|/1.2267e-29/hypothetical protein CICLE_v10003672mg [Citrus clementina]
Cs6g16810	Cs6g16810.1,Cs6g16810.2	222.33	275.61	250.7	4972.33	293.58	238.34	623.32	384.46	473.19	680.77	628.84	503.17	349.34	341.01	435.59	382.37	282.75	384.5	gene=Cs6g16810 CDS=429-1508	K02865|1|3e-51|203|sita:101759799|large subunit ribosomal protein L10Ae;K14771|2|1e-18|95.5|vcn:VOLCADRAFT_116880|U3 small nucleolar RNA-associated protein 19	-	GO:0005488;GO:0005488	-	gi|568856966|ref|XP_006482042.1|/0/PREDICTED: R3H domain-containing protein 2-like [Citrus sinensis]
Cs6g09820	Cs6g09820.1,Cs6g09820.2,Cs6g09820.3	221.98	331.17	235.38	4972.33	235.87	174.8	169.16	183.17	166.06	101.42	153.88	109.58	194.15	219.65	243.9	211.2	171.05	157.25	gene=Cs6g09820 CDS=692-2164	K08867|1|0.0|850|cic:CICLE_v10011307mg|WNK lysine deficient protein kinase [EC:2.7.11.1]	-	GO:0004674//protein serine/threonine kinase activity;GO:0004674//protein serine/threonine kinase activity;GO:0004674//protein serine/threonine kinase activity	-	gi|567873933|ref|XP_006429556.1|/0/hypothetical protein CICLE_v10011307mg [Citrus clementina]
Cs4g12200	Cs4g12200.1	221.81	208.32	214.49	4972.33	208.34	271.44	71.42	100.29	90.55	99.86	69.1	72.75	136.71	121.38	119.61	122.62	127.46	128.26	gene=Cs4g12200 CDS=116-520	K11251|1|3e-46|186|cic:CICLE_v10009865mg|histone H2A	-	-	-	gi|567920262|ref|XP_006452137.1|/1.51963e-45/hypothetical protein CICLE_v10009865mg [Citrus clementina]
Cs7g03840	Cs7g03840.1,Cs7g03840.2	221.37	157.86	198.61	4972.33	221.58	268.92	101.4	148.65	119.15	104	102.16	121	207.22	192.45	191.79	190.5	234.72	183.4	gene=Cs7g03840 CDS=218-547	K02915|1|2e-46|186|cic:CICLE_v10033093mg|large subunit ribosomal protein L34e	GO:0030529//intracellular ribonucleoprotein complex;GO:0030529//intracellular ribonucleoprotein complex	GO:0005198//structural molecule activity;GO:0005198//structural molecule activity	GO:0010467//gene expression;GO:0010467//gene expression	gi|567892325|ref|XP_006438683.1|/1.38246e-45/hypothetical protein CICLE_v10033093mg [Citrus clementina]
orange1.1t03010	orange1.1t03010.1	221.17	156.28	182.69	4972.33	223.4	208.34	48.49	53.45	40.3	39.36	28.94	33.81	26.02	29.84	29.51	14.55	33.24	17.76	gene=orange1.1t03010 CDS=568-948	K01251|1|2e-36|87.8|rcu:RCOM_0523500|adenosylhomocysteinase [EC:3.3.1.1]	-	GO:0016787//hydrolase activity	-	gi|641805163|gb|KDO35917.1|/2.83903e-61/hypothetical protein CISIN_1g043736mg [Citrus sinensis]
Cs7g26700	Cs7g26700.1	220.91	182.94	195.25	4972.33	197.13	218.77	25.81	57.04	37.38	29.3	30.2	34.67	72.48	52.12	56.12	43.24	57.08	47.86	gene=Cs7g26700 CDS=69-389	K03966|1|4e-55|213|cic:CICLE_v10022984mg|NADH dehydrogenase (ubiquinone) 1 beta subcomplex subunit 10	-	-	-	gi|567896954|ref|XP_006440965.1|/1.90244e-54/hypothetical protein CICLE_v10022984mg [Citrus clementina]
Cs9g18600	Cs9g18600.1,Cs9g18600.2,Cs9g18600.3	220.9	216.61	219.03	4972.33	231.74	248.41	164.61	200.66	193.32	226.26	235.05	259.76	223.72	209.34	206.29	225.09	198.81	227.37	gene=Cs9g18600 CDS=626-967	K06689|1|1e-71|270|egu:105040742|ubiquitin-conjugating enzyme E2 D/E [EC:2.3.2.23]	-	GO:0016879//ligase activity, forming carbon-nitrogen bonds;GO:0032559;GO:0016879//ligase activity, forming carbon-nitrogen bonds;GO:0032559;GO:0000166//nucleotide binding;GO:0019787//ubiquitin-like protein transferase activity	GO:0006464//cellular protein modification process;GO:0006464//cellular protein modification process;GO:0032446//protein modification by small protein conjugation	gi|672206368|ref|XP_008779418.1|/5.50761e-71/PREDICTED: ubiquitin-conjugating enzyme E2 10-like [Phoenix dactylifera]
Cs8g14970	Cs8g14970.1	220.56	158.58	223.07	4972.33	222.67	269.2	269.91	252.71	239.89	305.75	242	222.93	292.92	295.73	235.77	211.85	233.46	194.53	gene=Cs8g14970 CDS=159-812	K02865|1|8e-108|390|cit:102609236|large subunit ribosomal protein L10Ae	GO:0015934//large ribosomal subunit;GO:0031981//nuclear lumen	GO:0003676//nucleic acid binding;GO:0005198//structural molecule activity	GO:0010467//gene expression	gi|641839146|gb|KDO58080.1|/1.73012e-109/hypothetical protein CISIN_1g027063mg [Citrus sinensis]
Cs1g20800	Cs1g20800.1,Cs1g20800.2,Cs1g20800.3,Cs1g20800.4	220.14	264.01	214.78	4972.33	131.83	128.98	292.97	224.21	387.5	238.74	234.45	237.03	61.31	62.73	76.01	108.46	67.87	100.53	gene=Cs1g20800 CDS=614-2491	-	-	-	-	gi|568823931|ref|XP_006466361.1|/0/PREDICTED: uncharacterized protein LOC102625208 isoform X1 [Citrus sinensis]
Cs6g06160	Cs6g06160.1,Cs6g06160.2	219.81	261.68	234.36	4972.33	237.94	218.91	195.83	165.69	196.84	234.69	203.95	211.16	125.93	132.81	137.19	155.4	156.35	160.92	gene=Cs6g06160 CDS=667-1452	K00620|1|2e-23|112|cic:CICLE_v10011653mg|glutamate N-acetyltransferase / amino-acid N-acetyltransferase [EC:2.3.1.35 2.3.1.1]	-	-	-	gi|567872949|ref|XP_006429064.1|/4.37235e-135/hypothetical protein CICLE_v10012502mg [Citrus clementina]
Cs1g21090	Cs1g21090.1	219.43	173.52	207.91	4972.33	216.97	286.25	90.79	154.12	114.46	94.35	69.43	113.68	173.98	142.62	137.57	159.98	199.34	159.53	gene=Cs1g21090 CDS=75-383	K02266|1|7e-57|220|cit:102610939|cytochrome c oxidase subunit 6a	GO:0005746//mitochondrial respiratory chain	GO:0015002//heme-copper terminal oxidase activity	-	gi|568824013|ref|XP_006466401.1|/3.47382e-56/PREDICTED: cytochrome c oxidase subunit 6a, mitochondrial-like [Citrus sinensis]
Cs1g13520	Cs1g13520.1	218.92	277.14	244.07	4972.33	264.62	258.71	173.92	214.99	239.2	178.86	242.44	249.94	175.12	166.58	203.95	183.71	172.79	199.96	gene=Cs1g13520 CDS=278-1249	K18368|1|0.0|675|cit:102622303|caffeoylshikimate esterase [EC:3.1.1.-]	GO:0016020//membrane	-	GO:0000302//response to reactive oxygen species;GO:0010038//response to metal ion	gi|568821952|ref|XP_006465405.1|/0/PREDICTED: caffeoylshikimate esterase-like [Citrus sinensis]
Cs5g34040	Cs5g34040.1,Cs5g34040.2	218.46	208.26	207.17	4972.33	258.65	228.59	526.53	394.67	417.87	516.1	422.04	401.46	380.19	400.84	426.67	315.49	306.45	300.66	gene=Cs5g34040 CDS=307-1437	K03231|1|3e-78|294|cam:105852306|elongation factor 1-alpha	-	GO:0005488;GO:0005488	-	gi|568852947|ref|XP_006480131.1|/0/PREDICTED: polyadenylate-binding protein RBP47B-like [Citrus sinensis]
Cs2g05560	Cs2g05560.1	218.43	208.5	163.04	4972.33	179.28	173.36	68.65	187.3	167.5	41.86	105.8	134.48	468.12	525.95	434.45	446.31	729.4	523.6	gene=Cs2g05560 CDS=166-1005	-	-	-	-	gi|568826754|ref|XP_006467735.1|/1.60434e-73/PREDICTED: protein E6-like [Citrus sinensis]
Cs5g06580	Cs5g06580.1	215.38	234.71	205.72	4972.33	228.21	205.34	80.14	89.71	83.12	82.24	85.89	80.76	112.26	99.68	131.32	63.28	60.06	56	gene=Cs5g06580 CDS=84-671	K07304|1|2e-114|412|cit:102611875|peptide-methionine (S)-S-oxide reductase [EC:1.8.4.11]	-	GO:0016671//oxidoreductase activity, acting on a sulfur group of donors, disulfide as acceptor	GO:0043170	gi|568846178|ref|XP_006476934.1|/1.09188e-113/PREDICTED: peptide methionine sulfoxide reductase-like [Citrus sinensis]
Cs5g33050	Cs5g33050.1,Cs5g33050.2	214.87	160.93	195.06	4972.33	201.65	235.83	162.7	163.53	129.04	129.9	115	132.85	143.03	143.15	153.14	158.25	194.2	207.74	gene=Cs5g33050 CDS=259-825	K15730|1|7e-44|178|pda:103696151|cytosolic prostaglandin-E synthase [EC:5.3.99.3]	-	-	-	gi|567903634|ref|XP_006444305.1|/3.2141e-74/hypothetical protein CICLE_v10022431mg [Citrus clementina]
Cs7g01740	Cs7g01740.1	213.74	171.74	206.21	4972.33	171.55	188.97	78.48	108.57	95.71	46.52	57.86	81.86	74.68	81.26	86.91	65.44	82.4	68.94	gene=Cs7g01740 CDS=1-3249	K10999|1|0.0|2060|cit:102617105|cellulose synthase A [EC:2.4.1.12]	GO:0031224//intrinsic component of membrane	GO:0016759//cellulose synthase activity;GO:0046914//transition metal ion binding	GO:0045229//external encapsulating structure organization;GO:0009250//glucan biosynthetic process	gi|641864726|gb|KDO83412.1|/0/hypothetical protein CISIN_1g001413mg [Citrus sinensis]
Cs4g07410	Cs4g07410.1,Cs4g07410.2	213.12	228.68	232.81	4972.33	213.24	210.27	28.35	77.86	46.58	14.94	44.3	44	94.48	79.55	116.2	102.17	101.82	112.21	gene=Cs4g07410 CDS=519-1604	K01366|1|0.0|721|cit:102578016|cathepsin H [EC:3.4.22.16]	-	GO:0004175//endopeptidase activity;GO:0004175//endopeptidase activity	GO:0019538//protein metabolic process;GO:0019538//protein metabolic process	gi|572153072|ref|NP_001275826.1|/0/cysteine protease Cp precursor [Citrus sinensis]
Cs7g28890	Cs7g28890.1,Cs7g28890.2	213.1	176.78	196.96	4972.33	192.23	241.83	99.22	195.64	153.56	80.51	111.72	166.62	133.98	100.43	103.41	107.74	159.65	128.1	gene=Cs7g28890 CDS=103-270	K02902|1|2e-19|96.3|zma:101027259|large subunit ribosomal protein L28	-	-	-	gi|567872887|ref|XP_006429033.1|/7.14355e-27/hypothetical protein CICLE_v10013313mg, partial [Citrus clementina]
orange1.1t00956	orange1.1t00956.1	212.86	249.86	218.06	4972.33	209.87	208.74	205.64	253.68	237.65	248.02	159.55	164.88	204.52	188.76	242.78	319.82	273.66	351.2	gene=orange1.1t00956 CDS=149-1105	K07213|1|7e-07|56.2|ppp:PHYPADRAFT_49866|copper chaperone;K10752|2|2e-06|54.7|mdm:103421028|histone-binding protein RBBP4	-	-	-	gi|567871565|ref|XP_006428372.1|/3.40827e-88/hypothetical protein CICLE_v10012227mg [Citrus clementina]
orange1.1t04235	orange1.1t04235.1	212.57	245.78	263.65	4972.33	260.56	285.2	68.36	80.28	77.63	54.46	63.18	76.18	118.85	85.99	93.06	110.61	113.12	104.75	gene=orange1.1t04235 CDS=147-407	K01802|1|5e-42|169|cit:102622147|peptidylprolyl isomerase [EC:5.2.1.8]	-	GO:0016859//cis-trans isomerase activity	GO:0044267//cellular protein metabolic process	gi|641824053|gb|KDO43411.1|/2.44124e-41/hypothetical protein CISIN_1g033778mg [Citrus sinensis]
Cs3g19790	Cs3g19790.1,Cs3g19790.2	212.26	94.44	171.2	4972.33	164.73	222.77	180.07	188.52	157.52	119.29	90.91	126.76	292.71	281.74	203.62	200.65	194.74	140.89	gene=Cs3g19790 CDS=38-1540	K09580|1|0.0|980|cit:102609645|protein disulfide-isomerase A1 [EC:5.3.4.1]	GO:0044432;GO:0044432	GO:0016862//intramolecular oxidoreductase activity, interconverting keto- and enol-groups;GO:0015036//disulfide oxidoreductase activity;GO:0004576//oligosaccharyl transferase activity;GO:0016862//intramolecular oxidoreductase activity, interconverting keto- and enol-groups;GO:0015036//disulfide oxidoreductase activity;GO:0004576//oligosaccharyl transferase activity	GO:0018904;GO:0019725//cellular homeostasis;GO:0018904;GO:0019725//cellular homeostasis	gi|568837572|ref|XP_006472797.1|/0/PREDICTED: protein disulfide-isomerase-like isoform X1 [Citrus sinensis]
orange1.1t02860	orange1.1t02860.1	211.79	263.28	239.72	4972.33	226.21	191.33	123.46	147.12	133.95	121.63	122.16	121.11	118	105.45	125.88	113.05	125.21	115.4	gene=orange1.1t02860 CDS=306-1547	K11885|1|9e-09|62.8|aly:ARALYDRAFT_665390|DNA damage-inducible protein 1	GO:0044464	-	-	gi|568881146|ref|XP_006493450.1|/0/PREDICTED: probable serine incorporator-like [Citrus sinensis]
Cs2g05050	Cs2g05050.1,Cs2g05050.2,Cs2g05050.3	211.62	113.48	217.91	4972.33	148.24	151.57	542.75	170.01	393.04	756.73	297.11	442.25	252.88	247.26	237.03	779.79	360.93	819.19	gene=Cs2g05050 CDS=376-2169	K01568|1|0.0|1095|cic:CICLE_v10014703mg|pyruvate decarboxylase [EC:4.1.1.1]	-	GO:0046872//metal ion binding;GO:0016831//carboxy-lyase activity;GO:0019842//vitamin binding;GO:0046872//metal ion binding;GO:0016831//carboxy-lyase activity;GO:0019842//vitamin binding;GO:0046872//metal ion binding;GO:0016831//carboxy-lyase activity;GO:0019842//vitamin binding	-	gi|641859116|gb|KDO77806.1|/0/hypothetical protein CISIN_1g007800mg [Citrus sinensis]
orange1.1t01574	orange1.1t01574.1	211.44	198.24	217.93	4972.33	205.23	252.24	38.05	74.71	38.4	34.41	22.26	42.38	143.83	127.62	132.73	75.19	117.16	68.28	gene=orange1.1t01574 CDS=1-498	-	-	-	-	gi|567911373|ref|XP_006448000.1|/3.45102e-72/hypothetical protein CICLE_v10016998mg [Citrus clementina]
Cs6g19310	Cs6g19310.1	211.26	198.22	212.02	4972.33	194.87	191.96	131.15	187.95	176.73	112.11	130.24	185.26	110.92	87.79	97.43	105.61	91.13	96.98	gene=Cs6g19310 CDS=288-1751	K00033|1|0.0|936|cit:102611501|6-phosphogluconate dehydrogenase [EC:1.1.1.44 1.1.1.343]	-	GO:0016616//oxidoreductase activity, acting on the CH-OH group of donors, NAD or NADP as acceptor;GO:0048037//cofactor binding;GO:0000166//nucleotide binding	GO:0006007//glucose catabolic process	gi|568857581|ref|XP_006482343.1|/0/PREDICTED: 6-phosphogluconate dehydrogenase, decarboxylating 3-like isoform X1 [Citrus sinensis]
Cs5g25800	Cs5g25800.1	211.06	103.67	182.02	4972.33	128.41	282.54	5.71	111.52	102.57	8.95	33.97	135.42	0	0	0	0	0	0	gene=Cs5g25800 CDS=69-734	K11426|1|3e-59|228|sly:101250545|SET and MYND domain-containing protein;K19476|3|9e-18|90.9|mdm:103418875|vacuolar protein sorting-associated protein IST1	-	-	-	gi|567901646|ref|XP_006443311.1|/6.25393e-115/hypothetical protein CICLE_v10022142mg [Citrus clementina]
Cs9g14620	Cs9g14620.1	210.18	121.69	177.51	4972.33	207.26	225.94	159.95	152.25	127.43	139.39	101.22	95.54	160.11	154.76	144.96	120.76	143.75	125.6	gene=Cs9g14620 CDS=117-1868	K00053|1|0.0|1083|cit:102629524|ketol-acid reductoisomerase [EC:1.1.1.86]	-	GO:0043169//cation binding;GO:0016616//oxidoreductase activity, acting on the CH-OH group of donors, NAD or NADP as acceptor;GO:0048037//cofactor binding	GO:0008652//cellular amino acid biosynthetic process	gi|568874001|ref|XP_006490113.1|/0/PREDICTED: ketol-acid reductoisomerase, chloroplastic-like [Citrus sinensis]
Cs9g10830	Cs9g10830.1	209.6	425.07	295.81	4972.33	241.22	194.47	164.05	288.13	202.7	99.55	202.04	273.31	62.19	55.64	79.4	88.34	104.06	90.27	gene=Cs9g10830 CDS=38-886	K13259|1|3e-58|226|pvu:PHAVU_003G051600g|2,7,4'-trihydroxyisoflavanone 4'-O-methyltransferase / isoflavone 4'-O-methyltransferase [EC:2.1.1.212 2.1.1.46];K13262|2|5e-54|212|pvu:PHAVU_008G032700g|isoflavone-7-O-methyltransferase [EC:2.1.1.150]	-	-	-	gi|568873281|ref|XP_006489775.1|/3.55416e-150/PREDICTED: isoflavone 4'-O-methyltransferase-like [Citrus sinensis]
Cs7g10590	Cs7g10590.1,Cs7g10590.2,Cs7g10590.3	209.36	143.2	191.58	4972.33	193.07	233.05	403.35	311.55	307.15	403.27	305.21	273.13	348.77	327.76	333.74	297.8	286.9	277.09	gene=Cs7g10590 CDS=277-738	K02880|1|1e-85|312|cic:CICLE_v10032909mg|large subunit ribosomal protein L17e	GO:0030529//intracellular ribonucleoprotein complex;GO:0030529//intracellular ribonucleoprotein complex;GO:0030529//intracellular ribonucleoprotein complex	GO:0005198//structural molecule activity;GO:0005198//structural molecule activity;GO:0005198//structural molecule activity	GO:0010467//gene expression;GO:0010467//gene expression;GO:0010467//gene expression	gi|567891057|ref|XP_006438049.1|/1.08403e-87/hypothetical protein CICLE_v10032909mg [Citrus clementina]
Cs1g06880	Cs1g06880.1,Cs1g06880.2	208.6	164.37	240.46	4972.33	162.56	133.97	1457.54	588.96	1387.33	1860.46	1089.45	950.17	340.19	368.85	330.03	812.4	253.8	621.69	gene=Cs1g06880 CDS=175-783	K01953|1|2e-06|54.3|dosa:Os03t0291500-01|asparagine synthase (glutamine-hydrolysing) [EC:6.3.5.4]	GO:0016020//membrane;GO:0044444//cytoplasmic part;GO:0043231//intracellular membrane-bounded organelle;GO:0016020//membrane;GO:0044444//cytoplasmic part;GO:0043231//intracellular membrane-bounded organelle	-	-	gi|567919834|ref|XP_006451923.1|/1.2283e-149/hypothetical protein CICLE_v10009261mg [Citrus clementina]
Cs5g27130	Cs5g27130.1,Cs5g27130.2,Cs5g27130.3	208.48	175.44	208.86	4972.33	155.75	150.04	633.45	203.73	459.69	895.87	351.61	338.89	190.31	243.46	206.07	488.51	251.87	602.66	gene=Cs5g27130 CDS=196-801	K10712|1|5e-118|424|cit:102609978|cysteamine dioxygenase [EC:1.13.11.19]	-	GO:0016702//oxidoreductase activity, acting on single donors with incorporation of molecular oxygen, incorporation of two atoms of oxygen;GO:0016702//oxidoreductase activity, acting on single donors with incorporation of molecular oxygen, incorporation of two atoms of oxygen	GO:0008152//metabolic process;GO:0008152//metabolic process	gi|567901994|ref|XP_006443485.1|/2.8568e-158/hypothetical protein CICLE_v10021575mg [Citrus clementina]
Cs6g11650	Cs6g11650.1,Cs6g11650.2,Cs6g11650.3	207.99	259.6	229.34	4972.33	226.1	253.07	288.48	258.47	272.17	270.45	250.51	259	247.87	240.83	259.35	255.98	230.82	258.61	gene=Cs6g11650 CDS=54-386	K02152|1|2e-36|153|cit:102607458|V-type H+-transporting ATPase subunit G	-	-	GO:0006810//transport;GO:0006810//transport;GO:0006810//transport	gi|568855722|ref|XP_006481451.1|/1.23301e-35/PREDICTED: V-type proton ATPase subunit G-like isoform X1 [Citrus sinensis]
Cs3g07155	Cs3g07155.1	207.98	66.2	179.06	4972.33	112.95	234.82	3.03	42.48	28.66	2.53	9.09	40.42	27.79	15.47	28.52	14.79	13.24	13.01	gene=Cs3g07155 CDS=101-324	-	-	-	-	gi|568833630|ref|XP_006470987.1|/3.03239e-10/PREDICTED: uncharacterized protein LOC102578057 [Citrus sinensis]
Cs4g18090	Cs4g18090.1	207.75	187.8	251.33	4972.33	196.39	187.23	149.71	223.94	207.73	223.64	293.85	255.48	275.1	251.61	235.14	252.12	146.2	225.74	gene=Cs4g18090 CDS=90-674	-	-	-	-	gi|568843985|ref|XP_006475877.1|/5.69108e-83/PREDICTED: blue copper protein-like [Citrus sinensis]
Cs1g13720	Cs1g13720.1,Cs1g13720.2,Cs1g13720.3	206.92	210.34	219.15	4972.33	197.65	173.56	117.32	136.01	119.4	81.69	156.26	154.79	82.21	76.56	69.66	107.53	85.73	107.56	gene=Cs1g13720 CDS=637-5091	K05681|1|1e-44|184|cme:CYME_CMS467C|ATP-binding cassette, subfamily G (WHITE), member 2	-	-	-	gi|568821976|ref|XP_006465416.1|/0/PREDICTED: pleiotropic drug resistance protein 1-like [Citrus sinensis]
Cs7g04020	Cs7g04020.1,Cs7g04020.2	205.87	141.97	199.64	4972.33	205.8	260.03	472.03	328.09	290.61	348.6	221.38	221.54	31.42	30.54	29.5	23.77	27.76	24.53	gene=Cs7g04020 CDS=189-782	K02997|1|3e-98|359|cic:CICLE_v10032800mg|small subunit ribosomal protein S9e	GO:0030529//intracellular ribonucleoprotein complex;GO:0030529//intracellular ribonucleoprotein complex	GO:0003723//RNA binding;GO:0005198//structural molecule activity;GO:0003723//RNA binding;GO:0005198//structural molecule activity	GO:0010467//gene expression;GO:0010467//gene expression	gi|567892285|ref|XP_006438663.1|/1.52614e-97/hypothetical protein CICLE_v10032800mg [Citrus clementina]
Cs7g05150	Cs7g05150.1,Cs7g05150.2,Cs7g05150.3	205.56	157.64	176.39	4972.33	164.97	165.22	92.55	123.7	117.81	68.63	78.75	131.97	116.7	130.35	112.57	109.15	118.48	109.51	gene=Cs7g05150 CDS=508-3078	K10999|1|0.0|1958|cic:CICLE_v10007296mg|cellulose synthase A [EC:2.4.1.12]	GO:0031224//intrinsic component of membrane;GO:0031224//intrinsic component of membrane;GO:0031224//intrinsic component of membrane	GO:0016759//cellulose synthase activity;GO:0046914//transition metal ion binding;GO:0016759//cellulose synthase activity;GO:0046914//transition metal ion binding;GO:0016759//cellulose synthase activity;GO:0046914//transition metal ion binding	GO:0045229//external encapsulating structure organization;GO:0009250//glucan biosynthetic process;GO:0045229//external encapsulating structure organization;GO:0009250//glucan biosynthetic process;GO:0045229//external encapsulating structure organization;GO:0009250//glucan biosynthetic process	gi|567916926|ref|XP_006450469.1|/0/hypothetical protein CICLE_v10007296mg [Citrus clementina]
Cs2g25430	Cs2g25430.1	205.49	146.44	197.34	4972.33	181.33	250.73	113.46	117	97.25	82.37	73.24	95.61	194.58	179.11	167.68	167.29	152.79	141.89	gene=Cs2g25430 CDS=21-230	K07342|1|7e-25|112|cic:CICLE_v10017399mg|protein transport protein SEC61 subunit gamma and related proteins	GO:0044464	GO:0008320//protein transmembrane transporter activity	GO:0006886//intracellular protein transport	gi|567909473|ref|XP_006447050.1|/3.59283e-24/hypothetical protein CICLE_v10017399mg [Citrus clementina]
Cs1g19280	Cs1g19280.1	205.42	143.76	169.38	4972.33	102.5	180.52	163.24	156.23	182.6	569.21	154.36	407.58	33.48	21.39	31.84	31.74	37.82	16.23	gene=Cs1g19280 CDS=1-1008	K05278|1|0.0|666|cit:102626432|flavonol synthase [EC:1.14.11.23]	GO:0044424	GO:0043169//cation binding;GO:0019842//vitamin binding;GO:0016706//oxidoreductase activity, acting on paired donors, with incorporation or reduction of molecular oxygen, 2-oxoglutarate as one donor, and incorporation of one atom each of oxygen into both donors;GO:0016701//oxidoreductase activity, acting on single donors with incorporation of molecular oxygen	GO:0051553	gi|568823565|ref|XP_006466183.1|/0/PREDICTED: flavonol synthase/flavanone 3-hydroxylase-like [Citrus sinensis]
Cs3g01110	Cs3g01110.1	204.83	198.89	169.69	4972.33	183.98	181.4	92.13	129.2	140.92	100.39	98.18	136.11	171.63	200.56	185.74	166.13	219.9	172.41	gene=Cs3g01110 CDS=276-2141	K08472|1|0.0|1002|vvi:100233057|mlo protein	-	GO:0004553//hydrolase activity, hydrolyzing O-glycosyl compounds	GO:0044238//primary metabolic process	gi|567877577|ref|XP_006431347.1|/0/hypothetical protein CICLE_v10000600mg [Citrus clementina]
Cs6g22050	Cs6g22050.1	204.79	132.36	174.46	4972.33	189.83	205.26	47.5	107.14	73.81	39.35	72.08	114.78	106.71	102.32	89.42	62.96	115.82	79.54	gene=Cs6g22050 CDS=125-1567	K00012|1|0.0|965|cit:102626416|UDPglucose 6-dehydrogenase [EC:1.1.1.22]	-	GO:0016616//oxidoreductase activity, acting on the CH-OH group of donors, NAD or NADP as acceptor;GO:0000166//nucleotide binding	GO:0008152//metabolic process	gi|568858375|ref|XP_006482729.1|/0/PREDICTED: UDP-glucose 6-dehydrogenase 1-like [Citrus sinensis]
Cs7g23110	Cs7g23110.1,Cs7g23110.2,Cs7g23110.3,Cs7g23110.4,Cs7g23110.5	204.29	156.95	190.14	4972.33	190.88	229.07	162.36	194.06	160	131.77	123.2	141.12	256.77	269.52	233	216.96	219.73	206.94	gene=Cs7g23110 CDS=73-492	K02962|1|1e-66|254|cic:CICLE_v10017115mg|small subunit ribosomal protein S17e	GO:0015935//small ribosomal subunit;GO:0015935//small ribosomal subunit;GO:0015935//small ribosomal subunit;GO:0015935//small ribosomal subunit;GO:0015935//small ribosomal subunit	GO:0005198//structural molecule activity;GO:0005198//structural molecule activity;GO:0005198//structural molecule activity;GO:0005198//structural molecule activity;GO:0005198//structural molecule activity	GO:0010467//gene expression;GO:0010467//gene expression;GO:0010467//gene expression;GO:0010467//gene expression;GO:0010467//gene expression	gi|567906895|ref|XP_006445761.1|/3.88926e-66/hypothetical protein CICLE_v10017115mg [Citrus clementina]
Cs2g20280	Cs2g20280.1,Cs2g20280.2,Cs2g20280.3	204.27	233.47	216.41	4972.33	228.41	246.68	210	171.44	159.71	169.49	160.8	151.01	142.15	144.41	126.97	121.35	123.33	123.29	gene=Cs2g20280 CDS=247-684	K03236|1|7e-52|205|cmo:103497302|translation initiation factor 1A	-	GO:0008135//translation factor activity, RNA binding;GO:0008135//translation factor activity, RNA binding;GO:0008135//translation factor activity, RNA binding	GO:0006412//translation;GO:0006412//translation;GO:0006412//translation	gi|659115631|ref|XP_008457652.1|/4.70121e-51/PREDICTED: eukaryotic translation initiation factor 1A [Cucumis melo]
Cs4g06710	Cs4g06710.1,Cs4g06710.2	204	156.81	121.91	4972.33	110.64	148.96	3.98	30.43	28.63	2.06	8.22	19.27	42.24	26.92	26.14	29.1	50.6	15.54	gene=Cs4g06710 CDS=47-1654	K01051|1|0.0|857|cit:102610266|pectinesterase [EC:3.1.1.11]	GO:0030312//external encapsulating structure;GO:0030312//external encapsulating structure	GO:0030234//enzyme regulator activity;GO:0030234//enzyme regulator activity	GO:0071555//cell wall organization;GO:0071555//cell wall organization	gi|568841223|ref|XP_006474559.1|/0/PREDICTED: probable pectinesterase/pectinesterase inhibitor 54-like [Citrus sinensis]
Cs4g13220	Cs4g13220.1,Cs4g13220.2,Cs4g13220.3,Cs4g13220.4	203.65	225.24	200.6	4972.33	171.39	191.54	314.46	309.73	313.06	258.21	287.64	277.39	256.44	218.4	258.95	242.52	266.57	221.92	gene=Cs4g13220 CDS=179-838	K12194|1|9e-63|242|cit:102610273|charged multivesicular body protein 4	-	-	GO:0006810//transport;GO:0006810//transport;GO:0006810//transport;GO:0006810//transport	gi|567918720|ref|XP_006451366.1|/1.77416e-62/hypothetical protein CICLE_v10009534mg [Citrus clementina]
Cs2g23310	Cs2g23310.1	202.88	290.65	213.42	4972.33	300.08	219.51	653.5	640.23	810.25	1092.59	1024.52	656.84	347.96	338.83	477.44	384.65	321.62	404.15	gene=Cs2g23310 CDS=1-357	K06689|1|8e-35|145|eus:EUTSA_v10026967mg|ubiquitin-conjugating enzyme E2 D/E [EC:2.3.2.23]	-	GO:0000166//nucleotide binding;GO:0016874//ligase activity	-	gi|567218760|ref|XP_006413009.1|/4.96474e-34/hypothetical protein EUTSA_v10026967mg [Eutrema salsugineum]
Cs3g10630	Cs3g10630.1,Cs3g10630.2	202.77	245.95	225.4	4972.33	227.06	238.44	304.15	232.86	346.4	392.16	317.07	307.49	268.75	255.28	237.38	240.46	197.51	226.1	gene=Cs3g10630 CDS=131-886	K05275|1|3e-27|124|zma:100272747|pyridoxine 4-dehydrogenase [EC:1.1.1.65];K17744|3|1e-25|118|crb:CARUB_v10005247mg|L-galactose dehydrogenase [EC:1.1.1.316]	-	-	-	gi|567880789|ref|XP_006432953.1|/0/hypothetical protein CICLE_v10001273mg [Citrus clementina]
Cs2g21140	Cs2g21140.1	202.5	272.6	192.9	4972.33	208.08	153.31	148.01	158.02	143.92	122.55	162.7	135.07	98.43	98.17	104.95	96.79	105.31	107.67	gene=Cs2g21140 CDS=1-2436	K08245|1|0.0|927|cit:102628488|phytepsin [EC:3.4.23.40]	-	-	-	gi|641835738|gb|KDO54711.1|/0/hypothetical protein CISIN_1g009634mg [Citrus sinensis]
orange1.1t00625	orange1.1t00625.1,orange1.1t00625.2	200.83	115.89	167.51	4972.33	199.72	217.18	119.61	102.43	78.27	85.62	51.35	57.14	126.36	121.4	94.76	73.74	104.72	75.42	gene=orange1.1t00625 CDS=184-780	K02991|1|2e-104|380|cic:CICLE_v10005711mg|small subunit ribosomal protein S6e	-	-	-	gi|567856980|ref|XP_006421173.1|/9.52967e-104/hypothetical protein CICLE_v10005711mg [Citrus clementina]
Cs7g25390	Cs7g25390.1,Cs7g25390.2,Cs7g25390.3	200.5	100.28	159.33	4972.33	180.62	228.67	43.11	90.67	60.04	28.41	30.18	53.79	102.5	89.2	66.66	68.01	84.22	59.08	gene=Cs7g25390 CDS=90-1112	K00026|1|3e-167|588|cic:CICLE_v10008562mg|malate dehydrogenase [EC:1.1.1.37]	GO:0044429;GO:0044429;GO:0044429	GO:0016615//malate dehydrogenase activity;GO:0016615//malate dehydrogenase activity;GO:0016615//malate dehydrogenase activity	GO:0009060//aerobic respiration;GO:0005975//carbohydrate metabolic process;GO:0043648//dicarboxylic acid metabolic process;GO:0009060//aerobic respiration;GO:0005975//carbohydrate metabolic process;GO:0043648//dicarboxylic acid metabolic process;GO:0009060//aerobic respiration;GO:0005975//carbohydrate metabolic process;GO:0043648//dicarboxylic acid metabolic process	gi|567919464|ref|XP_006451738.1|/0/hypothetical protein CICLE_v10008562mg [Citrus clementina]
Cs8g18120	Cs8g18120.1	199.23	229.37	231.65	4972.33	216.58	227.47	204.66	183.58	217.29	194.72	96.3	149.33	215.23	201.7	206.08	288.6	169.18	188.37	gene=Cs8g18120 CDS=210-521	K11254|1|2e-37|156|sly:101252991|histone H4	-	-	-	gi|723704729|ref|XP_004240359.2|/1.33582e-36/PREDICTED: uncharacterized protein LOC101252991 [Solanum lycopersicum]
Cs7g26560	Cs7g26560.1,Cs7g26560.2,Cs7g26560.3,Cs7g26560.4,Cs7g26560.5,Cs7g26560.6	199.06	251.29	223.71	4972.33	176.48	193.68	104.09	176.67	154.91	114.2	155.16	169.56	163.05	158.41	142.12	122.78	112.51	93.74	gene=Cs7g26560 CDS=520-1047	-	-	-	-	-
Cs5g26850	Cs5g26850.1,Cs5g26850.2	198.98	239.42	235.55	4972.33	234.87	225.16	500.33	245.72	409.2	499.69	415.68	583.04	264.71	290.47	302.26	338.79	321.94	422.64	gene=Cs5g26850 CDS=205-1242	-	-	-	-	gi|568850896|ref|XP_006479133.1|/1.64046e-21/PREDICTED: DNA ligase 1-like isoform X1 [Citrus sinensis]
Cs7g04330	Cs7g04330.1,Cs7g04330.2,Cs7g04330.3,Cs7g04330.4,Cs7g04330.5,Cs7g04330.6,Cs7g04330.7,Cs7g04330.8	198.95	257.26	232.08	4972.33	230.54	247.91	159.46	120.93	119.27	176.87	230.03	195.09	103.11	101.49	117.28	150.16	111.93	139.41	gene=Cs7g04330 CDS=291-1148	-	GO:0031090//organelle membrane;GO:0009536//plastid;GO:0031090//organelle membrane;GO:0009536//plastid;GO:0031090//organelle membrane;GO:0009536//plastid;GO:0031090//organelle membrane;GO:0009536//plastid;GO:0031090//organelle membrane;GO:0009536//plastid;GO:0031090//organelle membrane;GO:0009536//plastid;GO:0031090//organelle membrane;GO:0009536//plastid;GO:0031090//organelle membrane;GO:0009536/…	GO:0019901//protein kinase binding;GO:0019901//protein kinase binding;GO:0019901//protein kinase binding;GO:0019901//protein kinase binding;GO:0019901//protein kinase binding;GO:0019901//protein kinase binding;GO:0019901//protein kinase binding;GO:0019901//protein kinase binding	-	gi|567892197|ref|XP_006438619.1|/4.66756e-145/hypothetical protein CICLE_v10032213mg [Citrus clementina]
Cs2g30420	Cs2g30420.1,Cs2g30420.2,Cs2g30420.3	198.74	205.12	208.51	4972.33	194.34	255.43	63.81	84.07	64.74	46.38	41.47	67.99	93.87	83.8	84.55	73.07	103.06	70.46	gene=Cs2g30420 CDS=137-379	-	-	-	-	gi|567907655|ref|XP_006446141.1|/7.11664e-40/hypothetical protein CICLE_v10018398mg [Citrus clementina]
Cs4g03510	Cs4g03510.1,Cs4g03510.2,Cs4g03510.3,Cs4g03510.4	198.32	196.53	213.44	4972.33	192.54	171.38	297.02	290.96	315.85	249.25	360.27	405.85	206.65	226.4	214.1	222.43	175.84	219.72	gene=Cs4g03510 CDS=189-2261	K00327|1|0.0|1075|cit:102609558|NADPH-ferrihemoprotein reductase [EC:1.6.2.4]	-	GO:0016653//oxidoreductase activity, acting on NAD(P)H, heme protein as acceptor;GO:0046914//transition metal ion binding;GO:0000166//nucleotide binding	GO:0008152//metabolic process	gi|567922728|ref|XP_006453370.1|/0/hypothetical protein CICLE_v10007535mg [Citrus clementina]
Cs1g19900	Cs1g19900.1	197.7	138.43	181.05	4972.33	174.25	218.53	102.98	91.28	78.51	105.81	66.42	67.39	161.28	154.57	136.22	128.79	126.02	114.5	gene=Cs1g19900 CDS=233-982	K02991|1|1e-108|394|cit:102622902|small subunit ribosomal protein S6e	GO:0030529//intracellular ribonucleoprotein complex	GO:0005198//structural molecule activity	GO:0010467//gene expression	gi|568823724|ref|XP_006466259.1|/6.65369e-108/PREDICTED: 40S ribosomal protein S6-like [Citrus sinensis]
orange1.1t04489	orange1.1t04489.1,orange1.1t04489.2	197.04	209.04	204.81	4972.33	160.39	194.51	33.56	120.27	82.01	25.74	71.58	67.28	246.85	291.11	369.83	245.55	335.9	258.46	gene=orange1.1t04489 CDS=14-1516	K01904|1|0.0|898|cit:102623419|4-coumarate--CoA ligase [EC:6.2.1.12]	-	GO:0016405//CoA-ligase activity;GO:0016703;GO:0032559;GO:0016405//CoA-ligase activity;GO:0016703;GO:0032559	GO:0006725//cellular aromatic compound metabolic process;GO:0006725//cellular aromatic compound metabolic process	gi|568884220|ref|XP_006494812.1|/0/PREDICTED: 4-coumarate--CoA ligase 1-like [Citrus sinensis]
Cs6g02720	Cs6g02720.1,Cs6g02720.2,Cs6g02720.3	196.82	188.76	194.35	4972.33	186.4	182.59	191.21	187.84	184.8	163.76	127.04	125.65	201.19	186.74	178.5	177.79	159.1	165.74	gene=Cs6g02720 CDS=368-1474	K03240|1|7e-08|60.1|tcc:TCM_025971|translation initiation factor eIF-2B subunit epsilon	-	GO:0008135//translation factor activity, RNA binding;GO:0008135//translation factor activity, RNA binding;GO:0008135//translation factor activity, RNA binding	GO:0006412//translation;GO:0006412//translation;GO:0006412//translation	gi|567872019|ref|XP_006428599.1|/0/hypothetical protein CICLE_v10011861mg [Citrus clementina]
Cs9g17850	Cs9g17850.1	196.06	182.06	214.9	4972.33	143.43	141.92	4.04	49.79	41.87	1.98	15.12	25.71	27.13	17.93	19.51	13.13	28.13	6.94	gene=Cs9g17850 CDS=1-1659	-	-	-	-	gi|567858610|ref|XP_006421988.1|/0/hypothetical protein CICLE_v10004673mg [Citrus clementina]
Cs2g23890	Cs2g23890.1	196.03	197.5	206.94	4972.33	218.97	236.56	233.02	214.41	228.33	234.53	192.43	189.59	269.5	274.97	264.84	279.88	219.02	252.9	gene=Cs2g23890 CDS=1-432	K07466|1|2e-66|251|cic:CICLE_v10017101mg|replication factor A1	-	-	-	gi|567909829|ref|XP_006447228.1|/8.24072e-66/hypothetical protein CICLE_v10017101mg [Citrus clementina]
Cs9g10300	Cs9g10300.1,Cs9g10300.2	196.01	140.17	178.06	4972.33	168.12	179.72	177.09	147.51	167.68	153.4	167.22	218.65	118.46	116.22	108.88	145.66	131.03	141.81	gene=Cs9g10300 CDS=458-1990	K16302|1|3e-65|250|pxb:103955485|metal transporter CNNM	-	GO:0016741;GO:0046914//transition metal ion binding	GO:0006730//one-carbon metabolic process	gi|568873155|ref|XP_006489716.1|/0/PREDICTED: probable methyltransferase PMT8-like [Citrus sinensis]
Cs5g33320	Cs5g33320.1	195.78	246.34	203.2	4972.33	140.37	139.36	1711.23	1213.19	1478.74	1360.8	1547.27	1195.89	1450.74	1212.2	1169.14	768.8	596.95	705.12	gene=Cs5g33320 CDS=165-461	-	-	-	-	gi|568852650|ref|XP_006479985.1|/8.55948e-37/PREDICTED: indole-3-acetic acid-induced protein ARG2-like [Citrus sinensis]
Cs1g20230	Cs1g20230.1,Cs1g20230.2	195.69	140.3	153.86	4972.33	148.42	206.31	5.78	40.92	39.09	8.53	15.15	36.03	41.69	30.99	34.53	18.77	44.84	15.12	gene=Cs1g20230 CDS=226-1185	K00430|1|1e-155|550|cit:102630988|peroxidase [EC:1.11.1.7]	-	-	-	gi|568823783|ref|XP_006466288.1|/1.6329e-141/PREDICTED: peroxidase 4-like [Citrus sinensis]
Cs9g03190	Cs9g03190.1	195.34	211.46	166.88	4972.33	224.04	185.87	80.08	110.58	110.91	59.73	85.88	70.4	181.3	157.45	204.47	224.38	349.14	285.86	gene=Cs9g03190 CDS=231-1511	-	-	-	-	gi|567906543|ref|XP_006445585.1|/0/hypothetical protein CICLE_v10015338mg [Citrus clementina]
Cs5g33350	Cs5g33350.1	195.26	171.96	174.59	4972.33	186.63	247.24	177.43	154.85	151.62	194.43	162.24	137.7	188.27	165.95	175.73	174.31	163.48	170.11	gene=Cs5g33350 CDS=189-752	K02883|1|3e-101|369|cic:CICLE_v10022435mg|large subunit ribosomal protein L18e	GO:0030529//intracellular ribonucleoprotein complex	GO:0005198//structural molecule activity	GO:0010467//gene expression	gi|567903794|ref|XP_006444385.1|/1.5762e-100/hypothetical protein CICLE_v10022435mg [Citrus clementina]
orange1.1t03730	orange1.1t03730.1,orange1.1t03730.2	194.79	159.1	180.08	4972.33	202.51	210.87	350.55	265.46	276.78	319.47	256.22	233.72	274.51	303	287.66	224.42	244.83	236.28	gene=orange1.1t03730 CDS=158-1414	K03233|1|0.0|739|cit:102609380|elongation factor 1-gamma	GO:0043234//protein complex;GO:0043234//protein complex	GO:0008135//translation factor activity, RNA binding;GO:0008135//translation factor activity, RNA binding	GO:0006412//translation;GO:0006412//translation	gi|227937359|gb|ACP43319.1|/0/translation elongation factor [Citrus maxima]
Cs2g02180	Cs2g02180.1,Cs2g02180.2	194.41	134.78	171.74	4972.33	266.01	224.51	84.7	299.96	176.56	16.04	45.02	45.22	231.81	218.71	273.03	113.71	259.74	128.68	gene=Cs2g02180 CDS=232-714	-	-	-	-	-
Cs6g04090	Cs6g04090.1,Cs6g04090.2	194.07	131.08	168.55	4972.33	195.27	217.58	128.02	136.36	114.49	113.27	87.9	76.55	134.75	156.35	114.68	86.68	136.75	95.53	gene=Cs6g04090 CDS=160-1377	K02930|1|0.0|699|cit:102619515|large subunit ribosomal protein L4e	GO:0030529//intracellular ribonucleoprotein complex;GO:0030529//intracellular ribonucleoprotein complex	GO:0005198//structural molecule activity;GO:0005198//structural molecule activity	GO:0010467//gene expression;GO:0010467//gene expression	gi|568853901|ref|XP_006480576.1|/0/PREDICTED: 60S ribosomal protein L4-like [Citrus sinensis]
Cs7g08660	Cs7g08660.1,Cs7g08660.2,Cs7g08660.3,Cs7g08660.4	193.95	363.95	261.68	4972.33	99.61	130.85	62.57	62.89	71.63	47.25	42.15	58.74	137.28	155.85	115.86	121.22	102.54	97.57	gene=Cs7g08660 CDS=1097-1867	K01673|1|2e-109|395|cic:CICLE_v10032517mg|carbonic anhydrase [EC:4.2.1.1]	-	GO:0016836//hydro-lyase activity;GO:0046914//transition metal ion binding;GO:0016836//hydro-lyase activity;GO:0046914//transition metal ion binding;GO:0016836//hydro-lyase activity;GO:0046914//transition metal ion binding;GO:0016836//hydro-lyase activity;GO:0046914//transition metal ion binding	-	gi|567891733|ref|XP_006438387.1|/2.79864e-113/hypothetical protein CICLE_v10032517mg [Citrus clementina]
Cs7g11730	Cs7g11730.1	193.79	68.72	150.47	4972.33	130.72	207.39	40.27	89.09	74.67	52.1	53.26	93.67	129.16	109.62	105.01	96.77	101.73	100.17	gene=Cs7g11730 CDS=56-1141	K13379|1|0.0|766|cic:CICLE_v10031914mg|reversibly glycosylated polypeptide / UDP-arabinopyranose mutase [EC:2.4.1.- 5.4.99.30]	GO:0044459;GO:0030312//external encapsulating structure	GO:0035251//UDP-glucosyltransferase activity	GO:0045229//external encapsulating structure organization;GO:0009250//glucan biosynthetic process	gi|567890729|ref|XP_006437885.1|/0/hypothetical protein CICLE_v10031914mg [Citrus clementina]
Cs5g22060	Cs5g22060.1,Cs5g22060.2	193.7	261.22	251.75	4972.33	170.09	287.57	378.11	385.27	391.55	276.38	214.04	242.85	207.98	191.56	202.65	196.2	119.66	147.79	gene=Cs5g22060 CDS=42-335	-	-	-	-	gi|567900678|ref|XP_006442827.1|/1.82668e-30/hypothetical protein CICLE_v10023203mg [Citrus clementina]
orange1.1t01399	orange1.1t01399.1,orange1.1t01399.2	193.51	174.93	156.97	4972.33	185.1	171.64	205.69	130.6	138.08	243.3	109.31	119.33	148.53	158.55	143.48	166.87	178.64	163	gene=orange1.1t01399 CDS=1407-3410	K01507|1|0.0|1322|cit:102578049|inorganic pyrophosphatase [EC:3.6.1.1]	GO:0016021//integral component of membrane;GO:0016021//integral component of membrane	GO:0046872//metal ion binding;GO:0015405;GO:0016628//oxidoreductase activity, acting on the CH-CH group of donors, NAD or NADP as acceptor;GO:0016462//pyrophosphatase activity;GO:0046872//metal ion binding;GO:0015405;GO:0016628//oxidoreductase activity, acting on the CH-CH group of donors, NAD or NADP as acceptor;GO:0016462//pyrophosphatase activity	GO:0006818//hydrogen transport;GO:0008152//metabolic process;GO:0006818//hydrogen transport;GO:0008152//metabolic process	gi|568878199|ref|XP_006492091.1|/0/PREDICTED: pyrophosphate-energized vacuolar membrane proton pump 1 [Citrus sinensis]
Cs5g11940	Cs5g11940.1,Cs5g11940.2	193.29	175.63	179.28	4972.33	193.69	213.87	79.34	103.47	75.5	44.68	60.21	58.68	102.27	101.25	94.34	61.21	111.44	67.81	gene=Cs5g11940 CDS=159-1058	K12741|1|6e-83|309|cit:102625620|heterogeneous nuclear ribonucleoprotein A1/A3	GO:0043231//intracellular membrane-bounded organelle;GO:0043231//intracellular membrane-bounded organelle	GO:0046914//transition metal ion binding;GO:0032559;GO:0046914//transition metal ion binding;GO:0032559	-	gi|568847707|ref|XP_006477673.1|/2.67163e-82/PREDICTED: glycine-rich RNA-binding protein 3, mitochondrial-like [Citrus sinensis]
Cs8g02530	Cs8g02530.1,Cs8g02530.2,Cs8g02530.3	193.14	244.03	155.71	4972.33	216.46	179.95	118.35	83.03	123.66	165.21	116.01	130.15	199.92	230.89	264.74	384	422.44	466.42	gene=Cs8g02530 CDS=165-779	K09872|1|5e-130|464|cit:102624436|aquaporin PIP	GO:0031224//intrinsic component of membrane;GO:0031224//intrinsic component of membrane	-	GO:0006810//transport;GO:0006810//transport	gi|567859860|ref|XP_006422584.1|/4.04436e-158/hypothetical protein CICLE_v10029003mg [Citrus clementina]
Cs6g09540	Cs6g09540.1	193.03	226.45	222.09	4972.33	217.55	224.02	103.4	160.51	141.11	146.95	401.85	404.56	192.76	148.31	126.11	280.98	118.02	264.01	gene=Cs6g09540 CDS=214-861	-	-	-	-	gi|567873875|ref|XP_006429527.1|/3.13358e-109/hypothetical protein CICLE_v10012729mg [Citrus clementina]
orange1.1t01461	orange1.1t01461.1	192.73	166.13	185.82	4972.33	176.96	187.91	45.62	96.16	69.68	80.43	63.96	67.64	86.32	84.82	73.08	67.73	86.06	71.82	gene=orange1.1t01461 CDS=1-258	K11353|1|2e-27|120|cic:CICLE_v10006172mg|NADH dehydrogenase (ubiquinone) 1 alpha subcomplex subunit 13	-	-	-	gi|641819107|gb|KDO39564.1|/1.30382e-26/hypothetical protein CISIN_1g031786mg [Citrus sinensis]
Cs5g33550	Cs5g33550.1	192.37	110.04	179.25	4972.33	173.01	221.87	235.54	153.37	189	206.66	128.62	153.26	245.24	232.04	206.38	241.9	180.44	206.74	gene=Cs5g33550 CDS=177-806	K02885|1|1e-87|323|cit:102616399|large subunit ribosomal protein L19e	-	-	-	gi|568852695|ref|XP_006480007.1|/5.57534e-87/PREDICTED: 60S ribosomal protein L19-2-like [Citrus sinensis]
Cs6g06560	Cs6g06560.1,Cs6g06560.2,Cs6g06560.3,Cs6g06560.4,Cs6g06560.5	191.65	209	201.01	4972.33	197.92	184.1	305.78	252.79	288.45	282.75	341.55	339.66	169.78	165.78	175.68	170.86	153.98	174.9	gene=Cs6g06560 CDS=709-1767	K00770|1|4e-53|164|aly:ARALYDRAFT_340891|1,4-beta-D-xylan synthase [EC:2.4.2.24]	-	-	-	gi|641832120|gb|KDO51161.1|/0/hypothetical protein CISIN_1g012776mg [Citrus sinensis]
Cs5g04740	Cs5g04740.1	191.48	199.67	186.66	4972.33	198.54	181.72	204.73	176.84	205.55	240.36	201.11	162.46	152.22	134.76	152.26	193.84	150.13	147.58	gene=Cs5g04740 CDS=226-1131	K08869|1|4e-19|97.1|cre:CHLREDRAFT_165812|aarF domain-containing kinase;K17613|2|1e-12|75.5|mpp:MICPUCDRAFT_55883|calcineurin-binding protein cabin-1	-	-	-	gi|568845681|ref|XP_006476696.1|/5.09629e-132/PREDICTED: transcription factor MYB1R1-like [Citrus sinensis]
Cs8g07240	Cs8g07240.1,Cs8g07240.2	190.94	174.28	196.14	4972.33	196.59	243.28	110.5	123.42	104.45	124.17	115.27	98.12	113.71	112.41	120.25	108.08	118.52	89.48	gene=Cs8g07240 CDS=127-453	K02975|1|3e-32|139|cic:CICLE_v10029627mg|small subunit ribosomal protein S25e	GO:0030529//intracellular ribonucleoprotein complex;GO:0030529//intracellular ribonucleoprotein complex	-	-	gi|719996260|ref|XP_010254770.1|/1.80622e-31/PREDICTED: 40S ribosomal protein S25-2-like [Nelumbo nucifera]
Cs8g07260	Cs8g07260.1	190.41	399.26	505.74	4972.33	144.39	187.52	306.06	466.67	127.73	146.49	291.99	112.45	972.34	1083.77	929.75	853.36	675.62	557.01	gene=Cs8g07260 CDS=1-237	-	-	-	-	gi|641828781|gb|KDO47920.1|/9.84896e-30/hypothetical protein CISIN_1g043728mg [Citrus sinensis]
Cs5g20510	Cs5g20510.1,Cs5g20510.2	190.35	137.47	155.9	4972.33	176.63	208.67	168.51	213.74	194.24	162.02	153.94	208.71	329.46	336.89	357.06	367.49	350.48	333.12	gene=Cs5g20510 CDS=754-1713	-	-	-	GO:0009414//response to water deprivation;GO:0009414//response to water deprivation	gi|641830663|gb|KDO49745.1|/4.87332e-163/hypothetical protein CISIN_1g018706mg [Citrus sinensis]
Cs6g13960	Cs6g13960.1,Cs6g13960.2,Cs6g13960.3,Cs6g13960.4	190.17	211.41	206.24	4972.33	193.67	200.79	110.6	149.33	132.34	132.32	113.09	136.93	160.57	145.38	155.7	156.8	182.34	162.98	gene=Cs6g13960 CDS=338-778	K10704|1|2e-79|296|gmx:100816570|ubiquitin-conjugating enzyme E2 variant	-	GO:0016879//ligase activity, forming carbon-nitrogen bonds;GO:0016879//ligase activity, forming carbon-nitrogen bonds;GO:0016879//ligase activity, forming carbon-nitrogen bonds;GO:0016879//ligase activity, forming carbon-nitrogen bonds	GO:0006464//cellular protein modification process;GO:0006464//cellular protein modification process;GO:0006464//cellular protein modification process;GO:0006464//cellular protein modification process	gi|571440932|ref|XP_006575294.1|/2.06312e-67/PREDICTED: ubiquitin-conjugating enzyme E2 variant 1D-like [Glycine max]
Cs6g05810	Cs6g05810.1	190.03	116.6	151.14	4972.33	159.79	240.44	57.38	130.87	111.47	87.58	69.15	109.31	204.74	162.13	184.6	146.03	194.37	133.85	gene=Cs6g05810 CDS=275-694	K11252|1|2e-48|194|cic:CICLE_v10013909mg|histone H2B	-	GO:0003676//nucleic acid binding	GO:0034728//nucleosome organization	gi|567872867|ref|XP_006429023.1|/9.16908e-48/hypothetical protein CICLE_v10013909mg [Citrus clementina]
Cs8g18050	Cs8g18050.1	189.19	77.78	140.44	4972.33	151.5	252.29	5.85	44.99	25.62	3.76	4.16	14.78	72.5	61.26	52.95	37.28	52.71	35.85	gene=Cs8g18050 CDS=1-453	K11251|1|6e-46|182|cic:CICLE_v10029498mg|histone H2A	GO:0000785//chromatin;GO:0043231//intracellular membrane-bounded organelle	GO:0003676//nucleic acid binding	GO:0034728//nucleosome organization	gi|567864238|ref|XP_006424768.1|/2.77658e-45/hypothetical protein CICLE_v10029498mg [Citrus clementina]
Cs8g06680	Cs8g06680.1	188.47	152.93	182.67	4972.33	165.67	182.36	8.29	82.86	76.42	11.57	31.71	78.42	89.12	42.93	48.94	26.36	35.78	34.17	gene=Cs8g06680 CDS=83-661	-	-	-	-	gi|568867700|ref|XP_006487171.1|/5.30545e-98/PREDICTED: organ-specific protein S2-like [Citrus sinensis]
Cs6g11710	Cs6g11710.1	188.2	127.95	161.18	4972.33	201.81	227.44	127.4	160.82	117.46	120.28	87.19	81.5	188.41	177.04	127.82	75.09	120.46	78.87	gene=Cs6g11710 CDS=171-671	K02870|1|9e-109|394|cic:CICLE_v10012805mg|large subunit ribosomal protein L12e	GO:0030529//intracellular ribonucleoprotein complex	GO:0005198//structural molecule activity	GO:0010467//gene expression	gi|567872389|ref|XP_006428784.1|/5.12163e-108/hypothetical protein CICLE_v10012805mg [Citrus clementina]
Cs7g07890	Cs7g07890.1,Cs7g07890.2,Cs7g07890.3,Cs7g07890.4	188.15	157.95	175.81	4972.33	177.65	159.32	157.05	182.36	165.45	148.66	123.48	147.08	162.75	172.96	169.75	160.9	172.55	153.62	gene=Cs7g07890 CDS=236-1420	K00161|1|0.0|652|cit:102613187|pyruvate dehydrogenase E1 component alpha subunit [EC:1.2.4.1]	GO:0043227//membrane-bounded organelle;GO:0043227//membrane-bounded organelle;GO:0043227//membrane-bounded organelle;GO:0043227//membrane-bounded organelle	GO:0004738//pyruvate dehydrogenase activity;GO:0004738//pyruvate dehydrogenase activity;GO:0004738//pyruvate dehydrogenase activity;GO:0004738//pyruvate dehydrogenase activity	GO:0006007//glucose catabolic process;GO:0006007//glucose catabolic process;GO:0006007//glucose catabolic process;GO:0006007//glucose catabolic process	gi|641863968|gb|KDO82654.1|/0/hypothetical protein CISIN_1g016175mg [Citrus sinensis]
Cs3g16750	Cs3g16750.1,Cs3g16750.10,Cs3g16750.11,Cs3g16750.12,Cs3g16750.2,Cs3g16750.3,Cs3g16750.4,Cs3g16750.5,Cs3g16750.6,Cs3g16750.7,Cs3g16750.8,Cs3g16750.9	187.71	234.4	194.58	4972.33	217.92	182.4	92.64	101.55	105.4	87.28	88.44	79.14	186.5	166.7	194.88	163.19	174.18	166.35	gene=Cs3g16750 CDS=723-1820	K14484|1|0.0|645|cit:102624962|auxin-responsive protein IAA	-	-	-	gi|568836730|ref|XP_006472387.1|/0/PREDICTED: auxin-responsive protein IAA9-like isoform X1 [Citrus sinensis]
Cs9g06930	Cs9g06930.1	187.69	219.79	185.98	4972.33	207.22	162.33	237.29	216.9	267.09	323.14	284.97	225.69	286.6	332.22	331.98	361.29	254.96	343.35	gene=Cs9g06930 CDS=448-1995	K12619|1|7e-45|183|bdi:100823403|5'-3' exoribonuclease 2 [EC:3.1.13.-];K13946|2|1e-15|85.9|gmx:100778756|auxin influx carrier (AUX1 LAX family);K10352|3|6e-12|73.9|pmum:103321923|myosin heavy chain	-	-	-	gi|568872464|ref|XP_006489388.1|/0/PREDICTED: FRIGIDA-like protein 4a-like [Citrus sinensis]
orange1.1t05456	orange1.1t05456.1	187.45	195.74	179.68	4972.33	190.9	223.53	6.51	0	0	0	0	0	0	19.73	7.54	0	0	0	gene=orange1.1t05456 CDS=1-240	K12271|1|1e-08|58.5|ppp:PHYPADRAFT_15522|signal recognition particle 43 kDa protein;K19044|4|1e-07|55.1|bdi:100837191|E3 ubiquitin-protein ligase XBAT32/33 [EC:2.3.2.27]	-	-	-	gi|641831109|gb|KDO50178.1|/7.50156e-38/hypothetical protein CISIN_1g018578mg [Citrus sinensis]
Cs2g14350	Cs2g14350.1,Cs2g14350.2	186.79	107.47	167.5	4972.33	179.01	220.6	84.12	137.31	95.71	53.43	63.96	95.84	97.14	98.39	80.18	56.93	90.27	57.72	gene=Cs2g14350 CDS=544-1290	K15102|1|5e-154|542|jcu:105630197|solute carrier family 25 (mitochondrial phosphate transporter), member 3	GO:0031224//intrinsic component of membrane;GO:0031224//intrinsic component of membrane	-	GO:0051234//establishment of localization;GO:0051234//establishment of localization	gi|567909291|ref|XP_006446959.1|/5.47062e-171/hypothetical protein CICLE_v10015678mg [Citrus clementina]
Cs6g07220	Cs6g07220.1	186.57	500.69	214.08	4972.33	240.56	137.28	91.91	84.16	75.99	69.58	84.47	53.33	148.87	159.85	269.51	208.68	306.24	344.36	gene=Cs6g07220 CDS=37-396	-	GO:0044464	GO:0016787//hydrolase activity;GO:0005488	GO:0010876//lipid localization	gi|567873283|ref|XP_006429231.1|/7.55453e-53/hypothetical protein CICLE_v10013135mg [Citrus clementina]
Cs8g16600	Cs8g16600.1	186.49	115.09	156.08	4972.33	193.06	239.31	101.07	126.75	105.92	109.09	80.51	96.18	236.67	235.18	238.29	229.91	223.74	237.58	gene=Cs8g16600 CDS=209-709	K02870|1|1e-88|327|cic:CICLE_v10029416mg|large subunit ribosomal protein L12e	GO:0030529//intracellular ribonucleoprotein complex	GO:0005198//structural molecule activity	GO:0010467//gene expression	gi|567863850|ref|XP_006424575.1|/6.18744e-88/hypothetical protein CICLE_v10029416mg [Citrus clementina]
Cs9g11030	Cs9g11030.1,Cs9g11030.2,Cs9g11030.3,Cs9g11030.4	186.21	182.08	181.8	4972.33	189.28	181.42	267.56	264.27	304.11	368.56	310.24	304.52	265.57	242.01	234.52	261.06	211.66	270.27	gene=Cs9g11030 CDS=222-881	K08511|1|4e-105|382|cic:CICLE_v10005852mg|vesicle-associated membrane protein 72	GO:0031224//intrinsic component of membrane;GO:0031224//intrinsic component of membrane;GO:0031224//intrinsic component of membrane;GO:0031224//intrinsic component of membrane	-	GO:0006810//transport;GO:0006810//transport;GO:0006810//transport;GO:0006810//transport	gi|641830290|gb|KDO49381.1|/2.32012e-82/hypothetical protein CISIN_1g0277592mg [Citrus sinensis]
Cs3g22250	Cs3g22250.1	186.2	172.89	193.36	4972.33	183.54	231.58	76.09	96.8	91.58	86.36	76.4	97.32	138.54	128.19	138.83	165.82	162.55	182.22	gene=Cs3g22250 CDS=95-382	-	-	-	-	gi|567884061|ref|XP_006434589.1|/1.93467e-47/hypothetical protein CICLE_v10002954mg [Citrus clementina]
Cs7g08910	Cs7g08910.1,Cs7g08910.2	186.05	112.91	156.67	4972.33	183.99	222.5	110.62	149.73	132.29	124.1	110.55	103.85	88.47	82.82	67.73	43.76	67	50.78	gene=Cs7g08910 CDS=127-597	K02977|1|5e-71|269|cit:102610115|small subunit ribosomal protein S27Ae	GO:0030529//intracellular ribonucleoprotein complex;GO:0030529//intracellular ribonucleoprotein complex	GO:0005198//structural molecule activity;GO:0005198//structural molecule activity	GO:0010467//gene expression;GO:0010467//gene expression	gi|568869646|ref|XP_006488031.1|/3.21456e-70/PREDICTED: ubiquitin-40S ribosomal protein S27a-like [Citrus sinensis]
Cs4g15310	Cs4g15310.1,Cs4g15310.2,Cs4g15310.3	185.48	111.75	173.37	4972.33	177.6	228.82	122.56	133.01	110.51	117.95	82.29	84.41	138.66	138.29	100.71	92.88	117.79	84.88	gene=Cs4g15310 CDS=19-570	K02940|1|8e-67|255|cic:CICLE_v10009377mg|large subunit ribosomal protein L9e	GO:0030529//intracellular ribonucleoprotein complex;GO:0030529//intracellular ribonucleoprotein complex;GO:0030529//intracellular ribonucleoprotein complex	GO:0003723//RNA binding;GO:0005198//structural molecule activity;GO:0003723//RNA binding;GO:0005198//structural molecule activity;GO:0003723//RNA binding;GO:0005198//structural molecule activity	GO:0010467//gene expression;GO:0010467//gene expression;GO:0010467//gene expression	gi|567918544|ref|XP_006451278.1|/1.39845e-100/hypothetical protein CICLE_v10009377mg [Citrus clementina]
Cs2g17980	Cs2g17980.1,Cs2g17980.2	185.32	298.63	177.52	4972.33	207.31	152.91	304.15	375.16	417.67	287.67	583.55	379.89	651	653.42	807.44	594.95	754.73	469	gene=Cs2g17980 CDS=156-887	K14379|1|1e-98|360|tcc:TCM_011231|tartrate-resistant acid phosphatase type 5 [EC:3.1.3.2];K01078|4|1e-91|336|rcu:RCOM_1150260|acid phosphatase [EC:3.1.3.2]	-	GO:0016791//phosphatase activity	-	gi|641841951|gb|KDO60861.1|/3.49914e-139/hypothetical protein CISIN_1g026017mg [Citrus sinensis]
Cs4g18790	Cs4g18790.1,Cs4g18790.2,Cs4g18790.3,Cs4g18790.4,Cs4g18790.5	185.22	249	181.58	4972.33	214.64	160.42	53.3	94.12	86.51	37.58	66.52	52.41	83.49	99.05	117.89	103.42	153.75	163.4	gene=Cs4g18790 CDS=86-1198	K01369|1|0.0|768|cic:CICLE_v10008097mg|legumain [EC:3.4.22.34]	-	GO:0004175//endopeptidase activity;GO:0004175//endopeptidase activity;GO:0004175//endopeptidase activity;GO:0004175//endopeptidase activity;GO:0004175//endopeptidase activity	GO:0019538//protein metabolic process;GO:0019538//protein metabolic process;GO:0019538//protein metabolic process;GO:0019538//protein metabolic process;GO:0019538//protein metabolic process	gi|567917578|ref|XP_006450795.1|/0/hypothetical protein CICLE_v10008097mg [Citrus clementina]
Cs6g22070	Cs6g22070.1	184.98	121.35	182.43	4972.33	188.1	245.51	210.2	176.16	139.13	165.01	111.48	110.34	286.72	298.39	242.65	232.46	269.42	228.5	gene=Cs6g22070 CDS=235-666	K02966|1|3e-78|292|cic:CICLE_v10013054mg|small subunit ribosomal protein S19e	GO:0030529//intracellular ribonucleoprotein complex	GO:0005198//structural molecule activity	GO:0010467//gene expression	gi|567877369|ref|XP_006431274.1|/1.8212e-77/hypothetical protein CICLE_v10013054mg [Citrus clementina]
Cs8g07440	Cs8g07440.1,Cs8g07440.2,Cs8g07440.3,Cs8g07440.4,Cs8g07440.5,Cs8g07440.6	183.99	180.03	188.06	4972.33	173.61	168.11	175.63	165.63	167.11	172.62	140.34	152.11	118.27	124.2	117.65	107.29	93.54	103.98	gene=Cs8g07440 CDS=339-1670	K00133|1|2e-06|54.7|aly:ARALYDRAFT_312479|aspartate-semialdehyde dehydrogenase [EC:1.2.1.11]	GO:0044464;GO:0044464;GO:0044464	-	GO:0051234//establishment of localization;GO:0051234//establishment of localization;GO:0051234//establishment of localization	gi|567861404|ref|XP_006423356.1|/0/hypothetical protein CICLE_v10028023mg [Citrus clementina]
Cs8g08740	Cs8g08740.1,Cs8g08740.2	183.68	168.45	169.52	4972.33	180.74	205.31	58.53	106.25	95.49	69.2	66.04	90.98	73.96	64.1	55.76	50.1	76.02	51.18	gene=Cs8g08740 CDS=208-564	K03965|1|1e-58|226|cic:CICLE_v10029601mg|NADH dehydrogenase (ubiquinone) 1 beta subcomplex subunit 9	-	-	-	gi|567861666|ref|XP_006423487.1|/5.55728e-65/hypothetical protein CICLE_v10029601mg [Citrus clementina]
Cs5g07190	Cs5g07190.1,Cs5g07190.2,Cs5g07190.3	183.59	151.31	183.61	4972.33	179.31	228.87	163.08	127.46	119.14	136.88	109.53	79.7	154.33	155.94	130.52	122.72	121	104.85	gene=Cs5g07190 CDS=304-984	K03232|1|6e-81|301|cic:CICLE_v10021530mg|elongation factor 1-beta	-	-	-	gi|567895220|ref|XP_006440098.1|/3.05802e-93/hypothetical protein CICLE_v10021530mg [Citrus clementina]
Cs2g16140	Cs2g16140.1	183.02	67.21	118.92	4972.33	78.8	181.01	54.67	94.29	173.01	151.11	123.37	373.31	47.53	34.58	42.87	47.57	41.91	24.27	gene=Cs2g16140 CDS=284-1021	K06464|1|3e-09|63.9|atr:105420786|integrin beta 2;K06588|1|3e-09|63.9|atr:105420786|integrin beta 5;K19519|1|3e-09|63.9|atr:105420786|transforming growth factor-beta-induced protein;K03456|2|8e-06|52.4|mus:103981635|serine/threonine-protein phosphatase 2A regulatory subunit A	-	-	-	gi|568829523|ref|XP_006469071.1|/1.95567e-83/PREDICTED: fasciclin-like arabinogalactan protein 13-like [Citrus sinensis]
Cs9g11480	Cs9g11480.1	182.6	334.84	253.56	4972.33	184.81	189.49	50.02	87.62	66.41	31.47	63.14	79.27	106.13	87.56	102.79	115.76	144.8	105.27	gene=Cs9g11480 CDS=48-1118	K13262|1|5e-99|362|vvi:100243529|isoflavone-7-O-methyltransferase [EC:2.1.1.150];K16040|2|1e-88|327|vvi:100233030|trans-resveratrol di-O-methyltransferase [EC:2.1.1.240];K13259|5|2e-84|313|gmx:100807589|2,7,4'-trihydroxyisoflavanone 4'-O-methyltransferase / isoflavone 4'-O-methyltransferase [EC:2.1.1.212 2.1.1.46]	-	-	-	gi|568873368|ref|XP_006489814.1|/0/PREDICTED: trans-resveratrol di-O-methyltransferase-like [Citrus sinensis]
Cs8g07570	Cs8g07570.1,Cs8g07570.2,Cs8g07570.3,Cs8g07570.4	182.58	141.46	148.88	4972.33	160.32	175.37	112.6	116.73	101.34	109.49	82.16	106.27	102.46	105.58	96.12	70.83	98.62	74.65	gene=Cs8g07570 CDS=256-711	K02155|1|4e-50|200|mus:103993546|V-type H+-transporting ATPase 16kDa proteolipid subunit	GO:0016469//proton-transporting two-sector ATPase complex;GO:0043231//intracellular membrane-bounded organelle;GO:0016469//proton-transporting two-sector ATPase complex;GO:0043231//intracellular membrane-bounded organelle;GO:0016469//proton-transporting two-sector ATPase complex;GO:0043231//intracellular membrane-bounded organelle;GO:0016469//proton-transporting two-sector ATPase complex;GO:00432…	-	GO:0015992//proton transport;GO:0015992//proton transport;GO:0015992//proton transport;GO:0015992//proton transport	gi|641821882|gb|KDO41482.1|/1.72291e-57/hypothetical protein CISIN_1g031125mg [Citrus sinensis]
Cs6g20900	Cs6g20900.1	182.25	104.55	150.75	4972.33	134.78	193.22	39.01	95.99	77.08	50.42	58.58	87.96	107.47	83.66	73.07	85.36	79.48	79.33	gene=Cs6g20900 CDS=1-1089	K01785|1|0.0|741|cit:102625926|aldose 1-epimerase [EC:5.1.3.3]	-	GO:0005488;GO:0016857//racemase and epimerase activity, acting on carbohydrates and derivatives	GO:0005996//monosaccharide metabolic process	gi|568858025|ref|XP_006482556.1|/0/PREDICTED: aldose 1-epimerase-like [Citrus sinensis]
Cs2g01050	Cs2g01050.1,Cs2g01050.2,Cs2g01050.3,Cs2g01050.4	181.83	218.93	202.47	4972.33	245.99	212.64	296.49	201.4	273.53	444.16	400.69	303.42	206.36	196.22	236.22	225.38	182.95	269.05	gene=Cs2g01050 CDS=175-693	K13523|1|3e-60|233|mtr:MTR_051s0004|lysophosphatidic acid acyltransferase / lysophosphatidylinositol acyltransferase [EC:2.3.1.51 2.3.1.-]	-	GO:0003676//nucleic acid binding;GO:0046914//transition metal ion binding;GO:0003676//nucleic acid binding;GO:0046914//transition metal ion binding;GO:0003676//nucleic acid binding;GO:0046914//transition metal ion binding;GO:0003676//nucleic acid binding;GO:0046914//transition metal ion binding	-	gi|641845915|gb|KDO64800.1|/1.26443e-98/hypothetical protein CISIN_1g030300mg [Citrus sinensis]
Cs4g03360	Cs4g03360.1,Cs4g03360.2	181.63	230.98	223.6	4972.33	207.67	258.76	29.01	44.81	39.81	41.1	31.69	39.84	25.56	20.81	26.2	28.51	28.77	23.98	gene=Cs4g03360 CDS=163-372	K03958|1|4e-07|56.2|cvr:CHLNCDRAFT_57885|NADH dehydrogenase (ubiquinone) 1 beta subcomplex subunit 2	GO:0005746//mitochondrial respiratory chain;GO:0030964//NADH dehydrogenase complex;GO:0005746//mitochondrial respiratory chain;GO:0030964//NADH dehydrogenase complex	-	-	gi|641827330|gb|KDO46516.1|/8.02298e-31/hypothetical protein CISIN_1g035245mg [Citrus sinensis]
Cs7g10910	Cs7g10910.1	181.55	156.8	157.18	4972.33	173.31	208.05	169.94	197.87	206.03	233.24	212.58	193.23	158.85	156.36	136.95	145	143.67	138.17	gene=Cs7g10910 CDS=258-629	K12669|1|8e-36|151|aly:ARALYDRAFT_334448|oligosaccharyltransferase complex subunit gamma;K17265|2|2e-06|53.9|jcu:105630554|Ras GTPase-activating protein-binding protein 1 [EC:3.6.4.12 3.6.4.13]	GO:0044464	-	GO:0051234//establishment of localization	gi|567890971|ref|XP_006438006.1|/1.06195e-65/hypothetical protein CICLE_v10033081mg [Citrus clementina]
Cs6g05830	Cs6g05830.1	181.45	157.45	165.79	4972.33	172.92	233.54	103.68	88.72	106.09	131.33	74.82	92.59	161.16	148.1	146.91	171.24	157.21	162.71	gene=Cs6g05830 CDS=332-784	K11251|1|9e-41|168|vvi:100265411|histone H2A	GO:0000785//chromatin;GO:0043231//intracellular membrane-bounded organelle	GO:0003676//nucleic acid binding	GO:0034728//nucleosome organization	gi|719991464|ref|XP_010253272.1|/5.17922e-40/PREDICTED: histone H2A [Nelumbo nucifera]
Cs7g16410	Cs7g16410.1,Cs7g16410.2	181.3	137	161.37	4972.33	123.32	152.78	151.66	171.34	176.03	122.6	145.57	188.76	178.42	173.6	150.45	163.12	154.41	176.85	gene=Cs7g16410 CDS=391-1176	K00326|1|1e-139|496|cic:CICLE_v10032349mg|cytochrome-b5 reductase [EC:1.6.2.2]	-	GO:0016653//oxidoreductase activity, acting on NAD(P)H, heme protein as acceptor;GO:0016653//oxidoreductase activity, acting on NAD(P)H, heme protein as acceptor	GO:0008152//metabolic process;GO:0008152//metabolic process	gi|567889474|ref|XP_006437259.1|/1.1035e-150/hypothetical protein CICLE_v10032349mg [Citrus clementina]
Cs8g12730	Cs8g12730.1	181.28	111.2	143.49	4972.33	101.75	167.72	129.72	258.09	390.69	261.03	235.34	387.23	106.7	88.69	64.12	80.96	59.17	64.36	gene=Cs8g12730 CDS=1-276	-	-	-	-	gi|641830922|gb|KDO49996.1|/1.66903e-45/hypothetical protein CISIN_1g036851mg [Citrus sinensis]
Cs5g03460	Cs5g03460.1,Cs5g03460.2,Cs5g03460.3	181.19	168.34	164.28	4972.33	198.67	199.59	153.96	98.64	157.68	381.51	178.2	232.16	225.52	215.18	262.48	393.49	337.06	454.09	gene=Cs5g03460 CDS=212-898	K09872|1|2e-114|412|cit:102628631|aquaporin PIP	GO:0031224//intrinsic component of membrane;GO:0031224//intrinsic component of membrane;GO:0031224//intrinsic component of membrane	-	GO:0006810//transport;GO:0006810//transport;GO:0006810//transport	gi|568845376|ref|XP_006476549.1|/7.50655e-173/PREDICTED: probable aquaporin PIP1-2-like isoform X2 [Citrus sinensis]
orange1.1t04637	orange1.1t04637.1,orange1.1t04637.2	181.05	254.78	188.51	4972.33	217.52	190.58	95.16	79.01	102.98	117.2	88.18	95.2	140.09	131.34	163.67	149.34	115.94	149.07	gene=orange1.1t04637 CDS=148-957	K00121|1|3e-152|538|cit:102623145|S-(hydroxymethyl)glutathione dehydrogenase / alcohol dehydrogenase [EC:1.1.1.284 1.1.1.1]	-	GO:0046872//metal ion binding;GO:0003824//catalytic activity;GO:0046872//metal ion binding;GO:0016491//oxidoreductase activity	GO:0008152//metabolic process;GO:0008152//metabolic process	gi|568884535|ref|XP_006494935.1|/0/PREDICTED: alcohol dehydrogenase-like 7-like [Citrus sinensis]
Cs7g04920	Cs7g04920.1	180.65	147.69	180.91	4972.33	192.22	215.95	119.69	112.18	100.3	147.21	76.77	98.28	113.42	113.5	78.83	88.49	120.69	92.59	gene=Cs7g04920 CDS=346-1011	K07936|1|6e-120|431|cic:CICLE_v10009427mg|GTP-binding nuclear protein Ran	-	GO:0017111//nucleoside-triphosphatase activity;GO:0032561//guanyl ribonucleotide binding	GO:0023052//signaling;GO:0009207;GO:0051169//nuclear transport;GO:0015031//protein transport	gi|674926778|emb|CDY06600.1|/3.53267e-119/BnaC02g13240D [Brassica napus]
Cs4g04090	Cs4g04090.1	180.53	130.66	153.19	4972.33	171.48	236.67	43.15	83.25	76.2	55.9	39.79	65.97	118.91	94.19	91.77	111.64	132.41	105.09	gene=Cs4g04090 CDS=177-446	-	-	-	-	gi|567922508|ref|XP_006453260.1|/1.54647e-46/hypothetical protein CICLE_v10010043mg [Citrus clementina]
Cs2g09790	Cs2g09790.1,Cs2g09790.2	180.1	257.51	199.69	4972.33	138.87	117.62	131.61	193.63	152.88	72.22	94.65	87.95	132.09	138.79	98.88	86.23	88.85	79.12	gene=Cs2g09790 CDS=32-1162	K02641|1|0.0|732|cit:102608960|ferredoxin--NADP+ reductase [EC:1.18.1.2]	GO:0034357;GO:0034357	GO:0008937//ferredoxin-NAD(P) reductase activity;GO:0050662//coenzyme binding;GO:0000166//nucleotide binding;GO:0008937//ferredoxin-NAD(P) reductase activity;GO:0050662//coenzyme binding;GO:0000166//nucleotide binding	GO:0008152//metabolic process;GO:0008152//metabolic process	gi|568827949|ref|XP_006468308.1|/0/PREDICTED: ferredoxin--NADP reductase, root isozyme, chloroplastic-like [Citrus sinensis]
Cs1g10550	Cs1g10550.1,Cs1g10550.2	179.95	99.07	157.87	4972.33	166.17	209.99	171.77	181.79	142.57	85.08	89.66	96.93	225.41	218.29	196.3	166.36	212.23	150.67	gene=Cs1g10550 CDS=165-707	K02937|1|2e-110|400|cit:102614577|large subunit ribosomal protein L7e	GO:0030529//intracellular ribonucleoprotein complex;GO:0030529//intracellular ribonucleoprotein complex	GO:0005198//structural molecule activity	GO:0010467//gene expression	gi|568821397|ref|XP_006465164.1|/9.869e-110/PREDICTED: 60S ribosomal protein L7-4-like [Citrus sinensis]
Cs8g10680	Cs8g10680.1	179.92	177.3	155.04	4972.33	200.34	217.86	65.6	67.04	66.45	82.01	71.07	56.38	106.39	104.53	85.53	87.49	98.62	95.51	gene=Cs8g10680 CDS=52-540	K03386|1|3e-67|254|ath:AT1G60740|peroxiredoxin (alkyl hydroperoxide reductase subunit C) [EC:1.11.1.15];K11187|2|4e-24|112|csl:COCSUDRAFT_52624|peroxiredoxin 5, atypical 2-Cys peroxiredoxin [EC:1.11.1.15]	-	GO:0016705//oxidoreductase activity, acting on paired donors, with incorporation or reduction of molecular oxygen;GO:0016209//antioxidant activity	GO:0008152//metabolic process;GO:0019725//cellular homeostasis	gi|568868533|ref|XP_006487541.1|/2.70142e-86/PREDICTED: peroxiredoxin-2B-like [Citrus sinensis]
Cs1g21970	Cs1g21970.1	179.65	141.11	144.97	4972.33	150.82	162.56	64.93	161.82	117.01	68.74	118.73	124.28	121.02	117.06	114.34	78.67	169.48	71.58	gene=Cs1g21970 CDS=698-2986	K18443|1|1e-127|458|rcu:RCOM_0732470|golgi-specific brefeldin A-resistance guanine nucleotide exchange factor 1;K13199|2|3e-27|125|mtr:MTR_7g081660|plasminogen activator inhibitor 1 RNA-binding protein;K11267|3|7e-21|103|mtr:MTR_091s0011|sister chromatid cohesion protein PDS5;K00121|4|4e-13|78.2|mdm:103428735|S-(hydroxymethyl)glutathione dehydrogenase / alcohol dehydrogenase [EC:1.1.1.284 1.1.1.1…	-	GO:0005515//protein binding;GO:0004175//endopeptidase activity	GO:0019538//protein metabolic process;GO:0044092//negative regulation of molecular function	gi|568824224|ref|XP_006466502.1|/0/PREDICTED: subtilisin-like protease-like [Citrus sinensis]
Cs5g07900	Cs5g07900.1,Cs5g07900.2	178.9	207.68	189.78	4972.33	188.84	195.43	158.52	155.38	142.78	199.04	159.05	161.42	200.21	165.72	219.4	244.86	212.73	344.15	gene=Cs5g07900 CDS=237-782	-	GO:0031224//intrinsic component of membrane	-	-	gi|568846512|ref|XP_006477097.1|/7.02345e-117/PREDICTED: bax inhibitor 1-like [Citrus sinensis]
Cs1g25600	Cs1g25600.1	178.84	139.65	306.49	4972.33	142.9	139.59	3125.87	250.94	1566.2	3443.77	1051.04	1505.97	358.34	516.21	282.7	1774.82	457.6	1523.2	gene=Cs1g25600 CDS=1-462	K15692|1|4e-46|183|jcu:105629434|E3 ubiquitin-protein ligase RNF13 [EC:2.3.2.27]	-	-	-	gi|568825187|ref|XP_006466965.1|/5.65989e-78/PREDICTED: thiosulfate sulfurtransferase 18-like isoform X1 [Citrus sinensis]
Cs2g04850	Cs2g04850.1,Cs2g04850.2,Cs2g04850.3	178.68	150.52	173.38	4972.33	176.37	209.3	175.7	181.97	179.3	157.97	141.3	173.7	187.79	177.68	176.35	155.05	171.18	159.19	gene=Cs2g04850 CDS=162-938	K06630|1|2e-126|453|cit:102613414|14-3-3 protein epsilon	-	GO:0005515//protein binding;GO:0005515//protein binding;GO:0005515//protein binding	-	gi|568826587|ref|XP_006467653.1|/1.69359e-142/PREDICTED: 14-3-3-like protein D-like [Citrus sinensis]
Cs7g26410	Cs7g26410.1	178.44	172.68	151.85	4972.33	183.3	153.8	19.95	70.63	41.61	6.66	28.39	23.6	81.96	76.83	78.67	49.32	140.98	54.93	gene=Cs7g26410 CDS=371-1858	K01381|1|1e-28|129|smo:SELMODRAFT_13348|saccharopepsin [EC:3.4.23.25];K00924|2|4e-28|127|tcc:TCM_041550|	-	GO:0008233//peptidase activity	-	gi|568864779|ref|XP_006485768.1|/0/PREDICTED: protein ASPARTIC PROTEASE IN GUARD CELL 1-like [Citrus sinensis]
Cs1g23980	Cs1g23980.1,Cs1g23980.2,Cs1g23980.3	177.3	205.86	186.78	4972.33	207.86	169.16	268.03	202.18	224.89	266.18	235.33	188.59	149.75	163.1	183	150.82	152.39	151.39	gene=Cs1g23980 CDS=177-1613	K11093|1|2e-87|324|cic:CICLE_v10025502mg|U1 small nuclear ribonucleoprotein 70kDa	-	GO:0005488;GO:0005488	-	gi|567866145|ref|XP_006425695.1|/1.09972e-86/hypothetical protein CICLE_v10025502mg [Citrus clementina]
Cs2g25720	Cs2g25720.1	176.84	144.07	168.89	4972.33	94.74	235.23	20.83	72.82	58.15	21.03	22.75	66.71	65.81	43.51	48.15	33.14	28.86	31.84	gene=Cs2g25720 CDS=268-1566	K15400|1|0.0|847|cit:102619952|omega-hydroxypalmitate O-feruloyl transferase [EC:2.3.1.188]	-	GO:0016747//transferase activity, transferring acyl groups other than amino-acyl groups	-	gi|568831714|ref|XP_006470104.1|/0/PREDICTED: omega-hydroxypalmitate O-feruloyl transferase-like [Citrus sinensis]
Cs3g25010	Cs3g25010.1	176.75	202.2	153.71	4972.33	134.67	149.94	31.82	63.64	59.87	18.32	25.97	44.96	200.51	231.25	313.16	193.6	495.24	298.83	gene=Cs3g25010 CDS=254-1180	K13081|1|5e-70|265|jcu:105641976|leucoanthocyanidin reductase [EC:1.17.1.3]	-	-	-	gi|568839085|ref|XP_006473525.1|/2.19048e-173/PREDICTED: isoflavone reductase-like protein-like [Citrus sinensis]
Cs6g05980	Cs6g05980.1	176.61	110.8	143.46	4972.33	139.14	218.1	23.98	70.45	47.07	31.64	19.34	37.22	84.55	98.07	81.17	80.36	84.8	59.47	gene=Cs6g05980 CDS=1-312	K11254|1|6e-40|162|ppp:PHYPADRAFT_152862|histone H4	GO:0000785//chromatin;GO:0043231//intracellular membrane-bounded organelle	GO:0003676//nucleic acid binding	GO:0034728//nucleosome organization	gi|721697114|ref|XP_003580388.2|/3.97702e-39/PREDICTED: uncharacterized protein LOC100841093 [Brachypodium distachyon]
Cs3g25740	Cs3g25740.1	176.12	195.43	189.17	4972.33	181.45	213.37	78.37	83.98	89.09	132.06	71.85	84.3	97.88	102.55	95.1	116.05	87.95	104.64	gene=Cs3g25740 CDS=269-679	K11253|1|1e-70|267|mtr:MTR_4g097170|histone H3	GO:0000785//chromatin;GO:0043231//intracellular membrane-bounded organelle	GO:0003676//nucleic acid binding	GO:0034728//nucleosome organization	gi|414867092|tpg|DAA45649.1|/4.16633e-70/TPA: histone H3 [Zea mays]
Cs7g06420	Cs7g06420.1	175.47	111.5	137.88	4972.33	147.53	157.67	146.66	180.78	162.6	105.08	114.64	152.99	165.54	176.34	157.55	126.77	157.62	135.33	gene=Cs7g06420 CDS=201-2129	K17086|1|0.0|1184|cit:102629963|transmembrane 9 superfamily member 2/4	GO:0031224//intrinsic component of membrane	-	-	gi|568859930|ref|XP_006483483.1|/0/PREDICTED: transmembrane 9 superfamily member 4-like [Citrus sinensis]
Cs2g23010	Cs2g23010.1	175.44	121.29	149.87	4972.33	148.51	177.03	45.5	100.59	72.87	35.57	37.83	61.08	23.53	24.71	23.83	18.11	25.99	22.96	gene=Cs2g23010 CDS=132-428	-	-	-	-	gi|567910115|ref|XP_006447371.1|/9.78706e-39/hypothetical protein CICLE_v10017293mg [Citrus clementina]
Cs6g02590	Cs6g02590.1	175.41	182.71	169.79	4972.33	208.97	221.25	113.06	112.4	105.18	166.06	128.68	92.48	111.9	102.77	102.61	84.48	124.7	94.82	gene=Cs6g02590 CDS=1-318	K01823|1|3e-06|50.8|eus:EUTSA_v10020933mg|isopentenyl-diphosphate delta-isomerase [EC:5.3.3.2]	GO:0044464	GO:0046914//transition metal ion binding	-	gi|567871991|ref|XP_006428585.1|/7.92621e-56/hypothetical protein CICLE_v10013411mg [Citrus clementina]
Cs9g17940	Cs9g17940.1	175.29	145.79	166.73	4972.33	184.6	148.66	201.64	180.85	153.78	150.05	134.69	102.96	208.52	227.64	196.18	152.7	168.1	142.69	gene=Cs9g17940 CDS=215-2746	K03234|1|0.0|1694|cic:CICLE_v10004309mg|elongation factor 2	-	GO:0017111//nucleoside-triphosphatase activity;GO:0008135//translation factor activity, RNA binding;GO:0032561//guanyl ribonucleotide binding	GO:0006412//translation;GO:0009207	gi|567859032|ref|XP_006422199.1|/0/hypothetical protein CICLE_v10004309mg [Citrus clementina]
Cs5g11880	Cs5g11880.1,Cs5g11880.2	174.38	131.66	161.73	4972.33	165.68	203.79	84.01	121.96	96.57	69.8	60.7	90.77	102.02	99.64	91.49	90.39	108.25	82.99	gene=Cs5g11880 CDS=756-1637	K02136|1|1e-156|554|cit:102624605|F-type H+-transporting ATPase subunit gamma	GO:0033178//proton-transporting two-sector ATPase complex, catalytic domain;GO:0033178//proton-transporting two-sector ATPase complex, catalytic domain	GO:0015078//hydrogen ion transmembrane transporter activity;GO:0019829//cation-transporting ATPase activity;GO:0015078//hydrogen ion transmembrane transporter activity;GO:0019829//cation-transporting ATPase activity	GO:0006818//hydrogen transport;GO:0006754//ATP biosynthetic process;GO:0006818//hydrogen transport;GO:0006754//ATP biosynthetic process	gi|568847699|ref|XP_006477669.1|/5.583e-156/PREDICTED: ATP synthase subunit gamma, mitochondrial-like [Citrus sinensis]
Cs9g18860	Cs9g18860.1	173.91	125.31	161.85	4972.33	161.54	204.45	113.56	140.36	120.84	111.5	96.4	123.83	235.23	231.19	226.65	229.41	204.74	228.4	gene=Cs9g18860 CDS=140-907	K00861|1|8e-20|98.6|vcn:VOLCADRAFT_103251|riboflavin kinase [EC:2.7.1.26];K07748|2|3e-10|66.6|jcu:105638060|sterol-4alpha-carboxylate 3-dehydrogenase (decarboxylating) [EC:1.1.1.170]	GO:0043231//intracellular membrane-bounded organelle	-	-	gi|567858792|ref|XP_006422079.1|/3.23305e-126/hypothetical protein CICLE_v10005564mg [Citrus clementina]
Cs4g13270	Cs4g13270.1,Cs4g13270.2,Cs4g13270.3,Cs4g13270.4	173.62	157.58	183.93	4972.33	209.12	245.02	161.14	163.96	151.48	147.47	144.84	164.67	253.1	246.02	208.08	179.96	238.66	195.28	gene=Cs4g13270 CDS=111-473	K02910|1|8e-50|197|cit:102612054|large subunit ribosomal protein L31e	GO:0030529//intracellular ribonucleoprotein complex;GO:0030529//intracellular ribonucleoprotein complex;GO:0030529//intracellular ribonucleoprotein complex;GO:0030529//intracellular ribonucleoprotein complex	GO:0005198//structural molecule activity;GO:0005198//structural molecule activity;GO:0005198//structural molecule activity;GO:0005198//structural molecule activity	GO:0010467//gene expression;GO:0010467//gene expression;GO:0010467//gene expression;GO:0010467//gene expression	gi|641836972|gb|KDO55930.1|/4.87799e-49/hypothetical protein CISIN_1g033375mg [Citrus sinensis]
orange1.1t02545	orange1.1t02545.1	173.43	125.29	166.43	4972.33	165.86	227.97	134.65	160.74	136.42	108.4	82.42	88.5	149.81	140.55	116.81	96.38	128.76	81.23	gene=orange1.1t02545 CDS=233-619	K02927|1|4e-68|259|atr:18441265|large subunit ribosomal protein L40e	GO:0043231//intracellular membrane-bounded organelle;GO:0030529//intracellular ribonucleoprotein complex	GO:0005198//structural molecule activity	GO:0010467//gene expression;GO:0032446//protein modification by small protein conjugation	gi|720049975|ref|XP_010271616.1|/2.23144e-67/PREDICTED: ubiquitin-60S ribosomal protein L40-like [Nelumbo nucifera]
Cs8g07250	Cs8g07250.1	172.78	287.55	445.77	4972.33	118.1	145.27	2051	2931.87	810.33	1442.17	2315.06	673.94	1602.43	1955.66	1479.46	1232.64	970.43	922.68	gene=Cs8g07250 CDS=9-257	-	-	-	-	gi|567861344|ref|XP_006423326.1|/6.79785e-36/hypothetical protein CICLE_v10029711mg [Citrus clementina]
Cs8g15970	Cs8g15970.1,Cs8g15970.2	172.56	164.89	177.98	4972.33	165.84	147.45	142.35	188.35	148.14	134.85	159.85	141.73	144.9	141.64	144.03	141.22	147.44	124.53	gene=Cs8g15970 CDS=69-2201	K13525|1|0.0|1377|cit:102612408|transitional endoplasmic reticulum ATPase	GO:0016020//membrane;GO:0016020//membrane	GO:0032559;GO:0042623//ATPase activity, coupled;GO:0032559;GO:0042623//ATPase activity, coupled	GO:0009987//cellular process;GO:0009987//cellular process	gi|641841291|gb|KDO60204.1|/0/hypothetical protein CISIN_1g003620mg [Citrus sinensis]
Cs9g16490	Cs9g16490.1	172.18	251.73	162.55	4972.33	222.4	169.13	61.29	121.29	88.72	43.73	88.44	66.79	141.35	122.46	122.2	104.73	130.84	109.53	gene=Cs9g16490 CDS=1-978	K14493|1|7e-43|174|smo:SELMODRAFT_443106|gibberellin receptor GID1 [EC:3.-.-.-]	-	-	-	gi|568874359|ref|XP_006490283.1|/6.83568e-167/PREDICTED: carboxylesterase 1-like [Citrus sinensis]
Cs1g04030	Cs1g04030.1,Cs1g04030.2	172.03	130.66	171.35	4972.33	173.11	204.13	112.6	127.06	101.33	95.68	67.98	91.72	96.48	90.49	90.82	101.2	104.79	94.76	gene=Cs1g04030 CDS=169-891	-	-	-	-	gi|567870669|ref|XP_006427956.1|/2.26811e-127/hypothetical protein CICLE_v10026373mg [Citrus clementina]
Cs4g04280	Cs4g04280.1,Cs4g04280.2	171.57	130.28	159.76	4972.33	185.88	208.44	235.83	209.87	194.06	233.73	196.16	180.83	273.71	255.89	250.02	202.19	249.55	212.14	gene=Cs4g04280 CDS=54-785	K02937|1|2e-106|386|cit:102611070|large subunit ribosomal protein L7e	GO:0030529//intracellular ribonucleoprotein complex;GO:0030529//intracellular ribonucleoprotein complex	GO:0005198//structural molecule activity;GO:0005198//structural molecule activity	GO:0010467//gene expression;GO:0010467//gene expression	gi|567922436|ref|XP_006453224.1|/1.22338e-105/hypothetical protein CICLE_v10009162mg [Citrus clementina]
Cs3g17930	Cs3g17930.1,Cs3g17930.2	171.28	110.74	148.72	4972.33	147.06	161.25	117.69	159.25	156.68	163.87	149.59	171.89	66.08	66.32	54.97	71.59	62.34	59.06	gene=Cs3g17930 CDS=241-819	K02267|1|3e-59|228|cit:102620251|cytochrome c oxidase subunit 6b	GO:0043231//intracellular membrane-bounded organelle;GO:0043231//intracellular membrane-bounded organelle	GO:0015002//heme-copper terminal oxidase activity;GO:0015002//heme-copper terminal oxidase activity	GO:0008152//metabolic process;GO:0008152//metabolic process	gi|568837087|ref|XP_006472562.1|/3.53503e-69/PREDICTED: cytochrome c oxidase subunit 6b-1-like [Citrus sinensis]
Cs9g08470	Cs9g08470.1,Cs9g08470.2	170.75	146.53	169.19	4972.33	191.21	217.26	136.34	122.3	112.3	142.63	101.64	94.76	132.92	126.48	135.55	103.03	121.05	107.72	gene=Cs9g08470 CDS=171-638	K02958|1|8e-75|281|cic:CICLE_v10006127mg|small subunit ribosomal protein S15e	GO:0030529//intracellular ribonucleoprotein complex;GO:0030529//intracellular ribonucleoprotein complex	GO:0003676//nucleic acid binding;GO:0005198//structural molecule activity;GO:0003676//nucleic acid binding;GO:0005198//structural molecule activity	GO:0010467//gene expression;GO:0010467//gene expression	gi|567853994|ref|XP_006420117.1|/3.89358e-74/hypothetical protein CICLE_v10006127mg [Citrus clementina]
Cs2g03510	Cs2g03510.1,Cs2g03510.2	170.21	112.5	148.87	4972.33	162.71	219.97	113.43	104.73	90.87	103.96	65.94	80.93	129.32	118.52	95.69	81.16	105.76	77.42	gene=Cs2g03510 CDS=147-548	K02955|1|3e-64|245|cit:102618656|small subunit ribosomal protein S14e	GO:0030529//intracellular ribonucleoprotein complex;GO:0030529//intracellular ribonucleoprotein complex	GO:0005198//structural molecule activity;GO:0005198//structural molecule activity	GO:0010467//gene expression;GO:0010467//gene expression	gi|641859463|gb|KDO78153.1|/3.52854e-80/hypothetical protein CISIN_1g039298mg, partial [Citrus sinensis]
Cs3g23290	Cs3g23290.1,Cs3g23290.2,Cs3g23290.3,Cs3g23290.4,Cs3g23290.5	169.82	159.46	161.24	4972.33	174.62	182.52	109.18	138.85	109.79	61.82	75.08	69.16	154.75	176.37	152.58	90.26	111.22	83.27	gene=Cs3g23290 CDS=39-1766	K13126|1|0.0|1134|cit:102628035|polyadenylate-binding protein	-	GO:0003676//nucleic acid binding;GO:0003676//nucleic acid binding;GO:0003676//nucleic acid binding;GO:0003676//nucleic acid binding	-	gi|568838590|ref|XP_006473293.1|/0/PREDICTED: polyadenylate-binding protein 8-like [Citrus sinensis]
Cs3g21790	Cs3g21790.1,Cs3g21790.2,Cs3g21790.3,Cs3g21790.4,Cs3g21790.5,Cs3g21790.6,Cs3g21790.7	169.8	231.57	206.45	4972.33	255.16	178.91	356.9	265.99	320.12	403.27	418.99	319.21	127.73	195.75	215.55	185.69	156.65	215.08	gene=Cs3g21790 CDS=1-3633	K12124|1|0.0|1747|cit:102626780|GIGANTEA	-	-	-	gi|568838203|ref|XP_006473104.1|/0/PREDICTED: protein GIGANTEA-like isoform X1 [Citrus sinensis]
Cs9g15000	Cs9g15000.1,Cs9g15000.2	169.64	110.46	155.93	4972.33	168.43	189.01	134.22	121.91	109.33	107.18	70.42	73.97	210.46	205	163.11	129.71	148.51	106.37	gene=Cs9g15000 CDS=399-959	K02877|1|4e-102|372|cic:CICLE_v10005611mg|large subunit ribosomal protein L15e	GO:0030529//intracellular ribonucleoprotein complex;GO:0030529//intracellular ribonucleoprotein complex	GO:0005198//structural molecule activity;GO:0005198//structural molecule activity	GO:0010467//gene expression;GO:0010467//gene expression	gi|567857884|ref|XP_006421625.1|/8.62179e-112/hypothetical protein CICLE_v10005611mg [Citrus clementina]
Cs2g29220	Cs2g29220.1,Cs2g29220.2	169.59	117.07	154.16	4972.33	151.93	193.16	102.22	123.13	105.85	75.77	92.23	89.62	169.49	169.87	138.14	111.25	128.36	98.58	gene=Cs2g29220 CDS=222-896	K03232|1|6e-82|305|cit:102619566|elongation factor 1-beta	GO:0043234//protein complex;GO:0005576//extracellular region;GO:0043234//protein complex;GO:0005576//extracellular region	GO:0008135//translation factor activity, RNA binding;GO:0008135//translation factor activity, RNA binding	GO:0006952//defense response;GO:0006412//translation;GO:0006952//defense response;GO:0006412//translation	gi|568832565|ref|XP_006470501.1|/3.83711e-73/PREDICTED: elongation factor 1-beta 2-like [Citrus sinensis]
Cs5g09390	Cs5g09390.1,Cs5g09390.2	169.34	139.14	158.03	4972.33	152.45	179.17	48.31	119.62	82.37	24.59	93.33	86.26	191.59	180.58	159.2	119.71	135.23	110.91	gene=Cs5g09390 CDS=189-812	K14998|1|1e-13|77.4|mdm:103431243|surfeit locus 1 family protein	GO:0031224//intrinsic component of membrane	GO:0005488	-	gi|568846863|ref|XP_006477262.1|/5.58679e-69/PREDICTED: non-specific lipid-transfer protein-like protein At2g13820-like [Citrus sinensis]
Cs7g19370	Cs7g19370.1,Cs7g19370.2,Cs7g19370.3,Cs7g19370.4,Cs7g19370.5,Cs7g19370.6,Cs7g19370.7,Cs7g19370.8,Cs7g19370.9	169	146	166.27	4972.33	156.82	145.89	189.1	154.88	151.79	118.72	113.19	124.42	114.56	138.93	115.55	114.43	110.73	104.41	gene=Cs7g19370 CDS=137-2671	K15979|1|0.0|1488|cic:CICLE_v10030606mg|staphylococcal nuclease domain-containing protein 1	GO:0031332//RNAi effector complex;GO:0031332//RNAi effector complex;GO:0031332//RNAi effector complex;GO:0031332//RNAi effector complex;GO:0031332//RNAi effector complex;GO:0031332//RNAi effector complex	GO:0016787//hydrolase activity;GO:0005488;GO:0016787//hydrolase activity;GO:0005488;GO:0016787//hydrolase activity;GO:0005488;GO:0016787//hydrolase activity;GO:0005488;GO:0016787//hydrolase activity;GO:0005488;GO:0016787//hydrolase activity;GO:0005488	GO:0016458//gene silencing;GO:0016458//gene silencing;GO:0016458//gene silencing;GO:0016458//gene silencing;GO:0016458//gene silencing;GO:0016458//gene silencing	gi|567888946|ref|XP_006436995.1|/0/hypothetical protein CICLE_v10030606mg [Citrus clementina]
Cs5g02290	Cs5g02290.1,Cs5g02290.2,Cs5g02290.3	168.84	148.78	166.78	4972.33	155.01	164.65	134	199.55	145.01	92.77	132.15	132.09	161.63	141.93	162.15	138.01	139.86	127.14	gene=Cs5g02290 CDS=147-1670	K01897|1|0.0|1007|cic:CICLE_v10019200mg|long-chain acyl-CoA synthetase [EC:6.2.1.3]	-	-	-	gi|641857782|gb|KDO76527.1|/0/hypothetical protein CISIN_1g006047mg [Citrus sinensis]
Cs1g02240	Cs1g02240.1	168.49	207.93	181.82	4972.33	147.27	165.32	96.86	230.37	77.47	29.69	100.39	63.25	12.47	9.32	18.3	18.06	10.11	15.2	gene=Cs1g02240 CDS=1-1569	K00517|1|0.0|1037|cit:102615630|	-	-	-	gi|568819522|ref|XP_006464298.1|/0/PREDICTED: cytochrome P450 82C4-like [Citrus sinensis]
Cs2g21430	Cs2g21430.1,Cs2g21430.2,Cs2g21430.3,Cs2g21430.4,Cs2g21430.5	167.72	144.64	149.7	4972.33	162.95	153.67	85.83	144.25	102.3	39.38	59	72.48	125.69	122.16	119.26	92.82	131.05	90.19	gene=Cs2g21430 CDS=948-3335	K01681|1|0.0|1598|cic:CICLE_v10014140mg|aconitate hydratase [EC:4.2.1.3]	GO:0044424	GO:0051536//iron-sulfur cluster binding;GO:0016836//hydro-lyase activity;GO:0051536//iron-sulfur cluster binding;GO:0016836//hydro-lyase activity;GO:0051536//iron-sulfur cluster binding;GO:0016836//hydro-lyase activity;GO:0051536//iron-sulfur cluster binding;GO:0016836//hydro-lyase activity;GO:0043169//cation binding;GO:0051536//iron-sulfur cluster binding;GO:0016836//hydro-lyase activity	GO:0044262//cellular carbohydrate metabolic process	gi|567910483|ref|XP_006447555.1|/0/hypothetical protein CICLE_v10014140mg [Citrus clementina]
Cs5g25370	Cs5g25370.1	167.58	240.59	161.49	4972.33	95.33	72.01	38.34	113.87	55.92	48.64	49.53	43.82	104.01	96.62	85.76	65.16	75.8	39.76	gene=Cs5g25370 CDS=159-1424	K03320|1|0.0|731|cic:CICLE_v10019808mg|ammonium transporter, Amt family	GO:0031224//intrinsic component of membrane	GO:0015101//organic cation transmembrane transporter activity	GO:0015696//ammonium transport	gi|567901568|ref|XP_006443272.1|/0/hypothetical protein CICLE_v10019808mg [Citrus clementina]
Cs6g22080	Cs6g22080.1,Cs6g22080.2	167.56	117.26	150.54	4972.33	150.09	158.04	87.62	144.57	107.7	78.8	77.61	93.95	137.28	142.84	140.65	115.93	134.87	101.26	gene=Cs6g22080 CDS=190-1593	K17732|1|0.0|777|cit:102627284|mitochondrial-processing peptidase subunit beta [EC:3.4.24.64]	-	GO:0046914//transition metal ion binding;GO:0004175//endopeptidase activity;GO:0046914//transition metal ion binding;GO:0004175//endopeptidase activity	GO:0019538//protein metabolic process;GO:0019538//protein metabolic process	gi|568858381|ref|XP_006482732.1|/0/PREDICTED: probable mitochondrial-processing peptidase subunit beta-like [Citrus sinensis]
Cs9g18000	Cs9g18000.1	167.56	305.64	246.46	4972.33	136.85	139.14	280.47	77.34	97.49	115.11	61.27	63.42	63.03	63.27	48.64	59.33	46.55	49.34	gene=Cs9g18000 CDS=151-390	K00264|1|3e-176|483|cit:102620225|glutamate synthase (NADPH/NADH) [EC:1.4.1.13 1.4.1.14]	-	GO:0005488;GO:0015930//glutamate synthase activity;GO:0016639//oxidoreductase activity, acting on the CH-NH2 group of donors, NAD or NADP as acceptor	GO:0008152//metabolic process	gi|568874817|ref|XP_006490510.1|/1.64181e-175/PREDICTED: glutamate synthase 1 [NADH], chloroplastic-like isoform X1 [Citrus sinensis]
Cs4g03450	Cs4g03450.1	167.42	104.81	127.55	4972.33	155.16	259.38	17.03	57.47	34.54	15.44	15.55	28.9	84.85	74.33	76.37	37.25	83.77	43.3	gene=Cs4g03450 CDS=289-600	K11254|1|2e-36|153|ppp:PHYPADRAFT_152862|histone H4	-	-	-	gi|721697114|ref|XP_003580388.2|/9.07734e-36/PREDICTED: uncharacterized protein LOC100841093 [Brachypodium distachyon]
Cs2g17040	Cs2g17040.1	166.94	134.35	139.18	4972.33	158.86	198.86	118.4	89.76	138.38	158.58	63.2	80.25	116.89	105.42	128.36	168.63	104.44	115.1	gene=Cs2g17040 CDS=142-774	K11275|1|2e-19|97.4|pda:103715045|histone H1/5	GO:0043231//intracellular membrane-bounded organelle;GO:0000785//chromatin	GO:0003676//nucleic acid binding	GO:0006351//transcription, DNA-templated;GO:0034728//nucleosome organization	gi|567911793|ref|XP_006448210.1|/1.06424e-38/hypothetical protein CICLE_v10016374mg [Citrus clementina]
Cs8g09910	Cs8g09910.1	166.73	56.89	118.5	4972.33	107.74	200.66	8.24	63.63	54.97	15.03	21.71	44.72	3.31	1.03	2.23	2.4	0.57	1.17	gene=Cs8g09910 CDS=1-1173	K00660|1|0.0|756|cit:102629616|chalcone synthase [EC:2.3.1.74]	-	GO:0016747//transferase activity, transferring acyl groups other than amino-acyl groups	GO:0009058//biosynthetic process	gi|641831000|gb|KDO50072.1|/0/hypothetical protein CISIN_1g044410mg, partial [Citrus sinensis]
Cs7g28340	Cs7g28340.1,Cs7g28340.2,Cs7g28340.3,Cs7g28340.4	166.54	173.78	135.12	4972.33	167.61	161.67	54.54	79.63	56.69	59.86	66.84	72.34	118.07	113.56	130.54	117.29	200.85	115.3	gene=Cs7g28340 CDS=134-622	K05021|1|2e-78|292|pvu:PHAVU_007G009800g|chloride intracellular channel protein 1;K05022|2|6e-65|248|brp:103851061|chloride intracellular channel protein 2;K01873|3|3e-56|219|aly:ARALYDRAFT_326110|valyl-tRNA synthetase [EC:6.1.1.9];K00799|4|7e-15|81.6|ppp:PHYPADRAFT_166420|glutathione S-transferase [EC:2.5.1.18]	-	-	-	gi|641848910|gb|KDO67786.1|/1.14582e-106/hypothetical protein CISIN_1g027907mg [Citrus sinensis]
Cs5g28880	Cs5g28880.1,Cs5g28880.2,Cs5g28880.3,Cs5g28880.4,Cs5g28880.5	166.45	189.98	167.25	4972.33	191.68	160.4	66.95	70.44	76.39	66.77	72.52	84.12	53.25	47.05	52.13	44.52	56.36	39.56	gene=Cs5g28880 CDS=271-1410	K00121|1|0.0|676|cit:102629862|S-(hydroxymethyl)glutathione dehydrogenase / alcohol dehydrogenase [EC:1.1.1.284 1.1.1.1]	-	GO:0046914//transition metal ion binding;GO:0016616//oxidoreductase activity, acting on the CH-OH group of donors, NAD or NADP as acceptor;GO:0046914//transition metal ion binding;GO:0016616//oxidoreductase activity, acting on the CH-OH group of donors, NAD or NADP as acceptor;GO:0046914//transition metal ion binding;GO:0016616//oxidoreductase activity, acting on the CH-OH group of donors, NAD or…	GO:0006067//ethanol metabolic process;GO:0006067//ethanol metabolic process;GO:0006067//ethanol metabolic process;GO:0006067//ethanol metabolic process;GO:0006067//ethanol metabolic process	gi|567902424|ref|XP_006443700.1|/0/hypothetical protein CICLE_v10020620mg [Citrus clementina]
Cs5g20660	Cs5g20660.1,Cs5g20660.2,Cs5g20660.3	166.41	154.91	166.74	4972.33	149	165.68	46.3	100.62	72.29	22.73	44.17	55.36	83.88	92.01	80.64	56.04	91.21	57.48	gene=Cs5g20660 CDS=288-1601	K00297|1|0.0|817|cic:CICLE_v10019406mg|methylenetetrahydrofolate reductase (NADPH) [EC:1.5.1.20]	-	GO:0016646//oxidoreductase activity, acting on the CH-NH group of donors, NAD or NADP as acceptor;GO:0016646//oxidoreductase activity, acting on the CH-NH group of donors, NAD or NADP as acceptor;GO:0016646//oxidoreductase activity, acting on the CH-NH group of donors, NAD or NADP as acceptor	GO:0000096//sulfur amino acid metabolic process;GO:0000096//sulfur amino acid metabolic process;GO:0000096//sulfur amino acid metabolic process	gi|568849550|ref|XP_006478513.1|/0/PREDICTED: methylenetetrahydrofolate reductase 2-like [Citrus sinensis]
orange1.1t01991	orange1.1t01991.1,orange1.1t01991.2	166.23	94.65	140.16	4972.33	138.48	179.53	39.75	92.94	69.28	44.37	43.46	70.72	96.39	85.18	76.66	78.66	82.48	66.82	gene=orange1.1t01991 CDS=226-894	K06630|1|2e-109|397|cic:CICLE_v10029087mg|14-3-3 protein epsilon	-	GO:0005515//protein binding;GO:0005515//protein binding	-	gi|567862314|ref|XP_006423811.1|/1.03993e-108/hypothetical protein CICLE_v10029087mg [Citrus clementina]
Cs5g07610	Cs5g07610.1,Cs5g07610.2	165.45	93.19	131.77	4972.33	154.49	207.76	164.53	176.06	151.02	128.89	97.97	113.98	176.05	157.99	134.86	128.03	143.5	117.84	gene=Cs5g07610 CDS=230-448	K02921|1|9e-43|174|pper:PRUPE_ppa013350mg|large subunit ribosomal protein L37Ae	-	-	-	gi|703152903|ref|XP_010110542.1|/4.05074e-42/hypothetical protein L484_023376 [Morus notabilis]
Cs5g09400	Cs5g09400.1,Cs5g09400.2,Cs5g09400.3	165.06	144.3	160	4972.33	168.14	162.66	138.51	138	122.32	93.11	103.07	95.53	117.55	135.04	157.25	145.28	207.16	214.81	gene=Cs5g09400 CDS=200-1339	K09560|1|4e-95|349|cit:102626305|suppressor of tumorigenicity protein 13	-	-	-	gi|568846865|ref|XP_006477263.1|/2.19029e-94/PREDICTED: FAM10 family protein At4g22670-like isoform X1 [Citrus sinensis]
Cs2g24540	Cs2g24540.1,Cs2g24540.2	164.81	202.01	182.83	4972.33	173.64	166.68	119.57	105.46	108.89	129.26	126.49	107.7	95.72	100.39	99.57	113.42	95.84	108.54	gene=Cs2g24540 CDS=162-1313	K00036|1|0.0|637|cic:CICLE_v10015153mg|glucose-6-phosphate 1-dehydrogenase [EC:1.1.1.49 1.1.1.363]	-	GO:0000166//nucleotide binding;GO:0016616//oxidoreductase activity, acting on the CH-OH group of donors, NAD or NADP as acceptor;GO:0000166//nucleotide binding;GO:0016616//oxidoreductase activity, acting on the CH-OH group of donors, NAD or NADP as acceptor	GO:0019318//hexose metabolic process;GO:0019318//hexose metabolic process	gi|567909699|ref|XP_006447163.1|/0/hypothetical protein CICLE_v10015153mg [Citrus clementina]
orange1.1t02046	orange1.1t02046.1	164.61	114.01	177.11	4972.33	165.08	139.97	90.34	283.43	146.52	82.53	110.1	105.62	240.91	216.28	192.99	149.3	172.37	125.11	gene=orange1.1t02046 CDS=110-1162	K00430|1|0.0|643|cit:102615778|peroxidase [EC:1.11.1.7]	-	GO:0046872//metal ion binding;GO:0003824//catalytic activity	-	gi|568879464|ref|XP_006492678.1|/0/PREDICTED: peroxidase 15-like [Citrus sinensis]
Cs9g19020	Cs9g19020.1	164.37	148.94	170.1	4972.33	116.62	151.9	26.87	99.2	76.74	11.7	69.72	86.11	95.59	62.13	79.75	64.21	144.76	55.48	gene=Cs9g19020 CDS=1-1617	-	-	-	-	gi|641837886|gb|KDO56835.1|/0/hypothetical protein CISIN_1g009286mg [Citrus sinensis]
Cs1g25120	Cs1g25120.1	163.7	334.81	211.32	4972.33	265.39	141.08	323.54	170.03	273.58	695.59	232.32	235.92	96.98	98.54	126.61	269.63	187.02	282.1	gene=Cs1g25120 CDS=318-896	K11275|1|3e-41|170|cic:CICLE_v10026549mg|histone H1/5	GO:0000785//chromatin;GO:0043231//intracellular membrane-bounded organelle	GO:0003676//nucleic acid binding	GO:0050896//response to stimulus;GO:0034728//nucleosome organization	gi|641852270|gb|KDO71135.1|/1.66241e-40/hypothetical protein CISIN_1g029524mg [Citrus sinensis]
Cs8g14300	Cs8g14300.1	163.47	152.28	134.22	4972.33	114.47	221.54	35.31	61.2	63.64	38.38	48.18	64.93	101.5	89.39	113.5	97.87	144.57	83.49	gene=Cs8g14300 CDS=253-702	-	-	-	-	gi|567862822|ref|XP_006424065.1|/9.48297e-81/hypothetical protein CICLE_v10029501mg [Citrus clementina]
Cs3g22360	Cs3g22360.1	163.37	215.95	172.58	4972.33	165.84	154.34	106.39	142.81	133.12	108.99	106.1	125.94	248.29	230.53	244.79	221.07	223.45	228.24	gene=Cs3g22360 CDS=96-455	K11267|1|4e-06|52.0|mtr:MTR_091s0011|sister chromatid cohesion protein PDS5	-	GO:0005515//protein binding;GO:0004175//endopeptidase activity	GO:0044092//negative regulation of molecular function	gi|568838375|ref|XP_006473189.1|/7.27921e-60/PREDICTED: subtilisin-like protease-like [Citrus sinensis]
Cs2g08850	Cs2g08850.1	162.74	335.64	217.08	4972.33	224.46	213.82	0	0.72	2.59	1.03	0.73	1.51	172.88	153.37	156.97	180.33	158.98	167.98	gene=Cs2g08850 CDS=140-406	K07213|1|1e-43|176|cit:102618660|copper chaperone	-	GO:0043169//cation binding	GO:0006812//cation transport	gi|568827569|ref|XP_006468127.1|/5.22434e-43/PREDICTED: copper transport protein ATX1-like [Citrus sinensis]
Cs5g03080	Cs5g03080.1,Cs5g03080.2,Cs5g03080.3,Cs5g03080.4,Cs5g03080.5,Cs5g03080.6	162.64	190.14	156.53	4972.33	130.14	118.06	73.73	77.59	62.84	31.36	36.35	34.66	128.38	117.9	110.96	73.29	99.39	50.61	gene=Cs5g03080 CDS=417-1883	K08232|1|2e-149|530|cit:102615220|monodehydroascorbate reductase (NADH) [EC:1.6.5.4]	-	GO:0016835//carbon-oxygen lyase activity;GO:0050662//coenzyme binding;GO:0016835//carbon-oxygen lyase activity;GO:0050662//coenzyme binding;GO:0016835//carbon-oxygen lyase activity;GO:0050662//coenzyme binding;GO:0016835//carbon-oxygen lyase activity;GO:0050662//coenzyme binding;GO:0016835//carbon-oxygen lyase activity;GO:0050662//coenzyme binding;GO:0016835//carbon-oxygen lyase activity;GO:00506…	GO:0008152//metabolic process;GO:0008152//metabolic process;GO:0008152//metabolic process;GO:0008152//metabolic process;GO:0008152//metabolic process;GO:0008152//metabolic process	gi|568845271|ref|XP_006476500.1|/0/PREDICTED: monodehydroascorbate reductase, chloroplastic-like [Citrus sinensis]
Cs4g17730	Cs4g17730.1	162.31	152.44	142.71	4972.33	187.02	185.94	630.54	417.63	412.72	731.67	539.92	423.19	137.99	143.23	140.49	104.08	139.06	125.43	gene=Cs4g17730 CDS=91-477	K12845|1|8e-57|221|cic:CICLE_v10009899mg|U4/U6 small nuclear ribonucleoprotein SNU13	GO:0030529//intracellular ribonucleoprotein complex;GO:0031981//nuclear lumen	GO:0003676//nucleic acid binding	GO:0022613//ribonucleoprotein complex biogenesis	gi|567917880|ref|XP_006450946.1|/4.25764e-56/hypothetical protein CICLE_v10009899mg [Citrus clementina]
orange1.1t00359	orange1.1t00359.1,orange1.1t00359.2,orange1.1t00359.3,orange1.1t00359.4,orange1.1t00359.5	162.27	69.81	142.87	4972.33	155.22	198.73	108.77	133.66	94.01	67.36	51.49	68.44	106.41	115.75	80.43	65.31	96.09	74.39	gene=orange1.1t00359 CDS=74-406	K02920|1|4e-56|219|cic:CICLE_v10022961mg|large subunit ribosomal protein L36e	GO:0030529//intracellular ribonucleoprotein complex;GO:0030529//intracellular ribonucleoprotein complex;GO:0030529//intracellular ribonucleoprotein complex;GO:0030529//intracellular ribonucleoprotein complex;GO:0030529//intracellular ribonucleoprotein complex	GO:0005198//structural molecule activity;GO:0005198//structural molecule activity;GO:0005198//structural molecule activity;GO:0005198//structural molecule activity;GO:0005198//structural molecule activity	GO:0010467//gene expression;GO:0010467//gene expression;GO:0010467//gene expression;GO:0010467//gene expression;GO:0010467//gene expression	gi|567905124|ref|XP_006445050.1|/2.12073e-55/hypothetical protein CICLE_v10022961mg [Citrus clementina]
Cs6g20640	Cs6g20640.1	162.18	103.52	137.59	4972.33	157.19	193.74	89.07	133.06	106.67	83.81	72.92	98.22	154.16	129.79	117.93	111.54	140.8	106.09	gene=Cs6g20640 CDS=198-1022	K15040|1|7e-153|541|cit:102619225|voltage-dependent anion channel protein 2	GO:0016021//integral component of membrane;GO:0031966//mitochondrial membrane	GO:0005244//voltage-gated ion channel activity;GO:0022829//wide pore channel activity	GO:0043269//regulation of ion transport	gi|568857970|ref|XP_006482536.1|/3.99559e-152/PREDICTED: mitochondrial outer membrane protein porin of 34 kDa-like [Citrus sinensis]
Cs7g10490	Cs7g10490.1,Cs7g10490.2,Cs7g10490.3	160.76	141.56	162.51	4972.33	146.58	163.71	153.11	201.93	174.14	189.11	149.29	160.09	157.73	134.9	132.87	107.98	140.33	102.6	gene=Cs7g10490 CDS=83-901	K02737|1|5e-151|326|cit:102624332|20S proteasome subunit beta 5 [EC:3.4.25.1]	GO:0043231//intracellular membrane-bounded organelle;GO:0000502//proteasome complex;GO:0043231//intracellular membrane-bounded organelle;GO:0000502//proteasome complex;GO:0043231//intracellular membrane-bounded organelle;GO:0000502//proteasome complex	GO:0004175//endopeptidase activity;GO:0004175//endopeptidase activity;GO:0004175//endopeptidase activity	GO:0006508//proteolysis;GO:0006508//proteolysis;GO:0006508//proteolysis	gi|567891101|ref|XP_006438071.1|/5.02292e-154/hypothetical protein CICLE_v10032238mg [Citrus clementina]
Cs7g02940	Cs7g02940.1,Cs7g02940.2	160.52	193.41	168.48	4972.33	145.49	156.57	175.7	144.13	169.69	253.49	145.76	171.95	145.62	128.51	163.29	195.43	169.74	213.6	gene=Cs7g02940 CDS=328-1077	K00162|1|2e-13|78.6|obr:102719045|pyruvate dehydrogenase E1 component beta subunit [EC:1.2.4.1];K13126|2|5e-09|63.5|fve:101312606|polyadenylate-binding protein	-	GO:0003676//nucleic acid binding;GO:0003676//nucleic acid binding	-	gi|567892607|ref|XP_006438824.1|/5.65553e-126/hypothetical protein CICLE_v10032547mg [Citrus clementina]
Cs7g04890	Cs7g04890.1	160.05	130	148.52	4972.33	152.17	197.16	71.64	102.78	97.49	100.71	85.27	103.74	71.1	58.18	63.2	73.98	78.54	74.11	gene=Cs7g04890 CDS=328-696	K00417|1|3e-54|213|cit:102607854|ubiquinol-cytochrome c reductase subunit 7	-	GO:0015078//hydrogen ion transmembrane transporter activity	GO:0022904//respiratory electron transport chain	gi|568859570|ref|XP_006483311.1|/1.42962e-53/PREDICTED: cytochrome b-c1 complex subunit 7-2-like [Citrus sinensis]
Cs6g04950	Cs6g04950.1	159.63	83	154.6	4972.33	153.08	198.43	54.75	67.42	46.32	31.03	19.83	31.32	80.82	79.66	67.6	59.76	77.69	48.83	gene=Cs6g04950 CDS=276-704	K02973|1|1e-71|271|cit:102622281|small subunit ribosomal protein S23e	GO:0030529//intracellular ribonucleoprotein complex	GO:0005198//structural molecule activity	GO:0010467//gene expression	gi|567872565|ref|XP_006428872.1|/5.48424e-71/hypothetical protein CICLE_v10013057mg [Citrus clementina]
Cs1g15030	Cs1g15030.1	159.62	122.85	156.7	4972.33	152.05	216.21	148.31	126.54	129.57	171.85	115.37	110.93	145.02	133.26	134.84	116.53	118.12	115.82	gene=Cs1g15030 CDS=153-440	K02922|1|7e-44|179|cic:CICLE_v10026841mg|large subunit ribosomal protein L37e	GO:0030529//intracellular ribonucleoprotein complex	GO:0043169//cation binding;GO:0003723//RNA binding;GO:0005198//structural molecule activity	GO:0010467//gene expression	gi|567868697|ref|XP_006426971.1|/4.23379e-43/hypothetical protein CICLE_v10026841mg [Citrus clementina]
Cs8g16700	Cs8g16700.1,Cs8g16700.2,Cs8g16700.3,Cs8g16700.4,Cs8g16700.5	159.58	188.77	188.7	4972.33	147	131.65	295.54	188.1	248.98	203.62	209.17	234.51	142.68	137.62	139.49	172.85	120.27	153.58	gene=Cs8g16700 CDS=254-2284	K03526|1|0.0|1241|cit:102630187|(E)-4-hydroxy-3-methylbut-2-enyl-diphosphate synthase [EC:1.17.7.1 1.17.7.3]	-	GO:0046914//transition metal ion binding;GO:0052592;GO:0046914//transition metal ion binding;GO:0052592;GO:0046914//transition metal ion binding;GO:0052592;GO:0046914//transition metal ion binding;GO:0052592;GO:0046914//transition metal ion binding;GO:0052592	GO:0006721;GO:0006721;GO:0006721;GO:0006721;GO:0006721	gi|567863872|ref|XP_006424585.1|/0/hypothetical protein CICLE_v10027881mg [Citrus clementina]
Cs1g22450	Cs1g22450.1,Cs1g22450.2,Cs1g22450.3,Cs1g22450.4	159.34	197.62	217.15	4972.33	178.89	185.41	66.47	114.11	75.64	67.03	67.87	124.97	127.54	91.73	95.74	171.35	112.27	173.69	gene=Cs1g22450 CDS=58-783	K00588|1|2e-116|378|cit:102617232|caffeoyl-CoA O-methyltransferase [EC:2.1.1.104]	-	GO:0008171//O-methyltransferase activity;GO:0043169//cation binding;GO:0008171//O-methyltransferase activity;GO:0043169//cation binding;GO:0008171//O-methyltransferase activity;GO:0043169//cation binding;GO:0008171//O-methyltransferase activity;GO:0043169//cation binding	GO:0006730//one-carbon metabolic process;GO:0009699//phenylpropanoid biosynthetic process;GO:0006730//one-carbon metabolic process;GO:0009699//phenylpropanoid biosynthetic process;GO:0006730//one-carbon metabolic process;GO:0009699//phenylpropanoid biosynthetic process;GO:0006730//one-carbon metabolic process;GO:0009699//phenylpropanoid biosynthetic process	gi|568824392|ref|XP_006466586.1|/1.19487e-134/PREDICTED: caffeoyl-CoA O-methyltransferase-like [Citrus sinensis]
Cs6g03960	Cs6g03960.1	159.32	250.43	203.39	4972.33	206.05	140.09	238.71	299.46	248.39	160.98	282.82	197.87	125.84	153.08	224.44	174.07	200.34	199.57	gene=Cs6g03960 CDS=467-2827	K12129|1|0.0|1328|cit:102616594|pseudo-response regulator 7	-	-	GO:0009987//cellular process	gi|568853879|ref|XP_006480565.1|/0/PREDICTED: two-component response regulator-like APRR7-like [Citrus sinensis]
Cs2g07660	Cs2g07660.1	159.07	182.55	186.84	4972.33	156.87	169.71	293.22	69.18	195.61	597.89	201.9	154.28	525.48	666.84	571.79	533.82	484.12	693.69	gene=Cs2g07660 CDS=358-2028	K01051|1|0.0|1031|cit:102630292|pectinesterase [EC:3.1.1.11]	-	GO:0016788//hydrolase activity, acting on ester bonds	-	gi|568827281|ref|XP_006467993.1|/0/PREDICTED: pectinesterase/pectinesterase inhibitor-like [Citrus sinensis]
Cs4g07030	Cs4g07030.1,Cs4g07030.2,Cs4g07030.3,Cs4g07030.4,Cs4g07030.5,Cs4g07030.6	159.01	114.44	136.75	4972.33	169.72	180.08	73.91	98.79	64.87	96.44	63.49	76.55	129.01	109.78	106.49	144.99	215.74	229.72	gene=Cs4g07030 CDS=227-985	K04078|1|3e-105|383|cit:102629283|chaperonin GroES	GO:0044424;GO:0044424;GO:0044424;GO:0044424;GO:0044424;GO:0044424	GO:0032559;GO:0032559;GO:0032559;GO:0032559;GO:0032559;GO:0032559	GO:0044267//cellular protein metabolic process;GO:0044267//cellular protein metabolic process;GO:0044267//cellular protein metabolic process;GO:0044267//cellular protein metabolic process;GO:0044267//cellular protein metabolic process;GO:0044267//cellular protein metabolic process	gi|568841493|ref|XP_006474693.1|/3.70571e-130/PREDICTED: 20 kDa chaperonin, chloroplastic-like isoform X1 [Citrus sinensis]
Cs1g06240	Cs1g06240.1	158.77	27.3	181.48	4972.33	100.13	112.72	1467.35	264.07	943.98	1201.03	372.94	451.76	484.56	601.43	398.56	654.13	577.59	941.82	gene=Cs1g06240 CDS=311-607	-	-	-	-	gi|567920012|ref|XP_006452012.1|/1.07139e-49/hypothetical protein CICLE_v10010020mg [Citrus clementina]
Cs1g04570	Cs1g04570.1,Cs1g04570.2,Cs1g04570.3,Cs1g04570.4,Cs1g04570.5	158.71	115.7	135.85	4972.33	117.18	139.87	124.1	101.43	112.45	129.25	96.97	186.75	56.38	52.71	58.51	74.05	76.63	71.78	gene=Cs1g04570 CDS=13-2523	K10999|1|0.0|2039|cic:CICLE_v10024766mg|cellulose synthase A [EC:2.4.1.12]	GO:0031224//intrinsic component of membrane;GO:0031224//intrinsic component of membrane;GO:0031224//intrinsic component of membrane;GO:0031224//intrinsic component of membrane;GO:0031224//intrinsic component of membrane	GO:0016759//cellulose synthase activity;GO:0046914//transition metal ion binding;GO:0016759//cellulose synthase activity;GO:0046914//transition metal ion binding;GO:0016759//cellulose synthase activity;GO:0046914//transition metal ion binding;GO:0016759//cellulose synthase activity;GO:0046914//transition metal ion binding;GO:0016759//cellulose synthase activity;GO:0046914//transition metal ion bi…	GO:0045229//external encapsulating structure organization;GO:0009250//glucan biosynthetic process;GO:0045229//external encapsulating structure organization;GO:0009250//glucan biosynthetic process;GO:0045229//external encapsulating structure organization;GO:0009250//glucan biosynthetic process;GO:0045229//external encapsulating structure organization;GO:0009250//glucan biosynthetic process;GO:0045…	gi|567870565|ref|XP_006427904.1|/0/hypothetical protein CICLE_v10024766mg [Citrus clementina]
Cs6g07420	Cs6g07420.1,Cs6g07420.2	158.66	123.65	172.57	4972.33	118.28	190.26	44.57	118.13	85.19	56.9	142.22	304.8	71.51	49.48	61.57	79.94	96.82	97.63	gene=Cs6g07420 CDS=177-620	-	-	-	-	gi|567873331|ref|XP_006429255.1|/5.76211e-88/hypothetical protein CICLE_v10012857mg [Citrus clementina]
Cs7g16640	Cs7g16640.1,Cs7g16640.2	158.64	86.16	127.8	4972.33	146.48	187.56	166.7	171.19	145.33	161.86	118.33	106.91	177.09	194.27	151.89	136.46	149.14	114.29	gene=Cs7g16640 CDS=185-856	K02995|1|4e-89|329|cic:CICLE_v10032694mg|small subunit ribosomal protein S8e	GO:0030529//intracellular ribonucleoprotein complex;GO:0009536//plastid;GO:0030529//intracellular ribonucleoprotein complex;GO:0009536//plastid	GO:0005198//structural molecule activity;GO:0005198//structural molecule activity	GO:0010467//gene expression;GO:0010467//gene expression	gi|641807400|gb|KDO36309.1|/1.78119e-88/hypothetical protein CISIN_1g045444mg, partial [Citrus sinensis]
Cs7g27610	Cs7g27610.1	158.39	128.22	151.58	4972.33	164.58	185.45	53.43	94.95	73.98	57.36	48.62	70.92	96.72	71.17	77.78	82.23	106.05	79.84	gene=Cs7g27610 CDS=169-675	K02138|1|3e-82|306|cit:102621805|F-type H+-transporting ATPase subunit d	GO:0005753//mitochondrial proton-transporting ATP synthase complex	GO:0015077//monovalent inorganic cation transmembrane transporter activity;GO:0003824//catalytic activity	GO:0006754//ATP biosynthetic process	gi|567887392|ref|XP_006436218.1|/1.6453e-81/hypothetical protein CICLE_v10032923mg [Citrus clementina]
Cs6g18950	Cs6g18950.1	157.85	144.47	168.57	4972.33	156.54	182.97	88.97	102.84	82.19	78.31	57.44	89.16	127.93	116.3	109.8	86.64	116.61	94.97	gene=Cs6g18950 CDS=1-426	K11599|1|6e-78|288|cit:102624041|proteasome maturation protein	GO:0043234//protein complex;GO:0009534//chloroplast thylakoid	-	-	gi|568857488|ref|XP_006482298.1|/3.59165e-77/PREDICTED: cyclin-B1-2-like [Citrus sinensis]
Cs6g15670	Cs6g15670.1,Cs6g15670.2,Cs6g15670.3,Cs6g15670.4	157.32	138.26	168	4972.33	137.83	137.09	276.32	199.25	229.41	216.75	142.05	199.63	194.03	208.21	144.57	304.1	191.96	334.29	gene=Cs6g15670 CDS=62-1645	K00873|1|0.0|722|cit:102619606|pyruvate kinase [EC:2.7.1.40]	-	-	-	gi|568856705|ref|XP_006481919.1|/0/PREDICTED: pyruvate kinase, cytosolic isozyme-like isoform X1 [Citrus sinensis]
orange1.1t00340	orange1.1t00340.1,orange1.1t00340.2	157.27	204.96	140.82	4972.33	179.49	164.87	294.45	191.48	276.35	388.44	302.36	257.37	148.18	141.96	205.68	159.28	152.49	167.47	gene=orange1.1t00340 CDS=2401-2904	-	-	-	-	gi|641867413|gb|KDO86097.1|/5.0563e-68/hypothetical protein CISIN_1g028704mg [Citrus sinensis]
Cs1g04730	Cs1g04730.1	157.24	221.84	204.33	4972.33	110.69	191.59	17.43	71.78	68.56	30.63	67.83	121.88	36.89	27.48	51.73	112.48	152.89	82.7	gene=Cs1g04730 CDS=53-436	-	-	-	-	gi|641834358|gb|KDO53353.1|/9.47593e-61/hypothetical protein CISIN_1g039915mg [Citrus sinensis]
Cs5g16440	Cs5g16440.1,Cs5g16440.2	157.15	228.93	164.09	4972.33	189.71	143.32	117.85	120.95	127.93	121.08	141.03	126.34	178.99	200.81	304.01	249.58	246.02	255.48	gene=Cs5g16440 CDS=197-1306	K01580|1|0.0|666|cit:102611084|glutamate decarboxylase [EC:4.1.1.15]	-	GO:0016831//carboxy-lyase activity;GO:0048037//cofactor binding;GO:0016831//carboxy-lyase activity;GO:0048037//cofactor binding	GO:0009064//glutamine family amino acid metabolic process;GO:0009064//glutamine family amino acid metabolic process	gi|641823195|gb|KDO42630.1|/0/hypothetical protein CISIN_1g010897mg [Citrus sinensis]
Cs2g31160	Cs2g31160.1	156.89	31.44	100.3	4972.33	143.78	206.38	1.12	57.76	32.27	3.26	1.88	15.99	41.3	26.8	50.78	22.13	55.35	32.13	gene=Cs2g31160 CDS=1-372	-	-	-	-	gi|567907835|ref|XP_006446231.1|/5.2051e-44/hypothetical protein CICLE_v10017249mg [Citrus clementina]
orange1.1t02698	orange1.1t02698.1	156.46	116.69	125.5	4972.33	166.48	157.22	194.5	234.8	155.92	129.94	106.35	168.59	223.95	215.9	218.07	200.24	232.94	200.53	gene=orange1.1t02698 CDS=1-171	K00416|1|2e-22|104|cit:102621644|ubiquinol-cytochrome c reductase subunit 6	GO:0043231//intracellular membrane-bounded organelle	GO:0015078//hydrogen ion transmembrane transporter activity	GO:0022904//respiratory electron transport chain	gi|568880806|ref|XP_006493298.1|/1.27075e-21/PREDICTED: cytochrome b-c1 complex subunit 6-like isoform X1 [Citrus sinensis]
Cs7g25310	Cs7g25310.1,Cs7g25310.2	156.37	95.77	127.76	4972.33	141.04	182.26	182.44	148.97	122.77	153.85	85.07	86.85	237.23	228.29	201.84	168.44	183.96	165.29	gene=Cs7g25310 CDS=40-660	K02873|1|5e-98|358|cit:102614464|large subunit ribosomal protein L13e	GO:0030529//intracellular ribonucleoprotein complex;GO:0030529//intracellular ribonucleoprotein complex	GO:0005198//structural molecule activity;GO:0005198//structural molecule activity	GO:0010467//gene expression;GO:0010467//gene expression	gi|568864560|ref|XP_006485662.1|/1.48727e-97/PREDICTED: 60S ribosomal protein L13-1-like [Citrus sinensis]
orange1.1t01617	orange1.1t01617.1	156.33	122.89	126.11	4972.33	146.19	212.13	48.25	134.18	112.67	60.72	62.31	77.88	193.94	156.03	159.99	129.16	180.71	136.6	gene=orange1.1t01617 CDS=1-312	K03963|1|2e-55|214|cic:CICLE_v10017277mg|NADH dehydrogenase (ubiquinone) 1 beta subcomplex subunit 7	GO:0043231//intracellular membrane-bounded organelle	GO:0050136//NADH dehydrogenase (quinone) activity	-	gi|567911451|ref|XP_006448039.1|/1.15178e-54/hypothetical protein CICLE_v10017277mg [Citrus clementina]
Cs2g09970	Cs2g09970.1	156.26	189.62	159.09	4972.33	182.52	162.1	140.43	109.87	128.01	160.24	147.16	118.95	90.93	95.9	120.17	122.69	123.89	174.96	gene=Cs2g09970 CDS=185-1519	K07375|1|0.0|858|cic:CICLE_v10015255mg|tubulin beta	GO:0032991//macromolecular complex;GO:0015630//microtubule cytoskeleton	GO:0017111//nucleoside-triphosphatase activity;GO:0032561//guanyl ribonucleotide binding	GO:0043623//cellular protein complex assembly;GO:0009207;GO:0007017//microtubule-based process	gi|567913117|ref|XP_006448872.1|/0/hypothetical protein CICLE_v10015255mg [Citrus clementina]
Cs3g25530	Cs3g25530.1	155.6	255.81	189.22	4972.33	170.76	101.35	180.07	337.32	244.01	169.29	285.5	193.86	208.52	186.71	225.82	159.75	230.72	141.45	gene=Cs3g25530 CDS=292-1401	K01373|1|0.0|697|cit:102608509|cathepsin F [EC:3.4.22.41]	-	GO:0004175//endopeptidase activity	GO:0019538//protein metabolic process	gi|641866035|gb|KDO84720.1|/0/hypothetical protein CISIN_1g017548mg [Citrus sinensis]
Cs4g10030	Cs4g10030.1,Cs4g10030.2	155.31	191.97	174.03	4972.33	185.02	157.13	108.68	119.22	121.88	93.46	110.31	108.78	149.28	153.57	161.54	155.21	151.24	151.89	gene=Cs4g10030 CDS=286-1413	K08245|1|4e-132|473|cic:CICLE_v10008027mg|phytepsin [EC:3.4.23.40]	-	GO:0004175//endopeptidase activity;GO:0004175//endopeptidase activity	GO:0019538//protein metabolic process;GO:0019538//protein metabolic process	gi|568842191|ref|XP_006475035.1|/0/PREDICTED: aspartic proteinase-like [Citrus sinensis]
Cs5g03830	Cs5g03830.1,Cs5g03830.2	155.28	213.76	175.7	4972.33	157.77	135.67	174.65	180.79	165.41	92.5	99.72	108.39	214.06	223.41	246.23	147.88	148.85	114	gene=Cs5g03830 CDS=152-829	K00432|1|3e-122|439|cit:102616580|glutathione peroxidase [EC:1.11.1.9]	GO:0044424;GO:0044424	GO:0016705//oxidoreductase activity, acting on paired donors, with incorporation or reduction of molecular oxygen;GO:0004601//peroxidase activity;GO:0016705//oxidoreductase activity, acting on paired donors, with incorporation or reduction of molecular oxygen;GO:0004601//peroxidase activity	GO:0008152//metabolic process;GO:0006950//response to stress;GO:0008152//metabolic process;GO:0006950//response to stress	gi|568845474|ref|XP_006476598.1|/4.25837e-127/PREDICTED: probable phospholipid hydroperoxide glutathione peroxidase-like [Citrus sinensis]
Cs4g14090	Cs4g14090.1,Cs4g14090.2,Cs4g14090.3,Cs4g14090.4	155.21	82.09	98.22	4972.33	129.41	125.01	25.52	78.74	72.48	38.55	72.89	62.76	58.58	39.34	51.68	42.17	61.2	55.22	gene=Cs4g14090 CDS=129-1694	K12309|1|0.0|905|pxb:103951856|beta-galactosidase [EC:3.2.1.23]	-	GO:0030246//carbohydrate binding;GO:0015925//galactosidase activity;GO:0043167//ion binding;GO:0030246//carbohydrate binding;GO:0015925//galactosidase activity;GO:0043167//ion binding;GO:0030246//carbohydrate binding;GO:0015925//galactosidase activity;GO:0043167//ion binding;GO:0030246//carbohydrate binding;GO:0015925//galactosidase activity;GO:0043167//ion binding	GO:0044238//primary metabolic process;GO:0044238//primary metabolic process;GO:0044238//primary metabolic process;GO:0044238//primary metabolic process	gi|641838825|gb|KDO57763.1|/0/hypothetical protein CISIN_1g004219mg [Citrus sinensis]
orange1.1t02542	orange1.1t02542.1	154.68	147.39	159.02	4972.33	173.94	172.51	59.55	80.62	59.98	35.67	46.11	47.6	125.74	130.1	121.6	95.26	135.33	109.78	gene=orange1.1t02542 CDS=59-1021	K01057|1|2e-173|608|cit:102626574|6-phosphogluconolactonase [EC:3.1.1.31]	-	-	GO:0006007//glucose catabolic process	gi|568880520|ref|XP_006493166.1|/1.36957e-172/PREDICTED: probable 6-phosphogluconolactonase 4, chloroplastic-like [Citrus sinensis]
Cs8g09060	Cs8g09060.1	154.58	91.18	142.9	4972.33	135.96	159.98	69.89	77.87	58.64	39.24	28.07	42.35	84.04	85.24	68.87	61.9	62.18	58.76	gene=Cs8g09060 CDS=210-980	K13249|1|2e-156|553|cic:CICLE_v10028497mg|translocon-associated protein subunit alpha	GO:0043231//intracellular membrane-bounded organelle	-	-	gi|567861888|ref|XP_006423598.1|/9.68221e-156/hypothetical protein CICLE_v10028497mg [Citrus clementina]
Cs9g15890	Cs9g15890.1,Cs9g15890.2	154.46	96.09	148.42	4972.33	146.78	181.61	108.57	118.45	84.73	110.72	67.58	62.55	219.96	203.02	171.04	164.91	186.56	163.09	gene=Cs9g15890 CDS=117-539	K02953|1|8e-75|282|cic:CICLE_v10022677mg|small subunit ribosomal protein S13e	GO:0030529//intracellular ribonucleoprotein complex;GO:0030529//intracellular ribonucleoprotein complex	GO:0005198//structural molecule activity;GO:0005198//structural molecule activity	GO:0010467//gene expression;GO:0010467//gene expression	gi|567858120|ref|XP_006421743.1|/2.83638e-80/hypothetical protein CICLE_v10006145mg [Citrus clementina]
Cs3g07260	Cs3g07260.1,Cs3g07260.2,Cs3g07260.3,Cs3g07260.4,Cs3g07260.5	154.41	196.65	160.84	4972.33	160.16	147.91	90.01	80.93	91.77	95.09	68.76	66.74	94.9	111.09	93.75	83.14	77.38	74.08	gene=Cs3g07260 CDS=57-1157	K08829|1|0.0|758|cic:CICLE_v10003654mg|male germ cell-associated kinase [EC:2.7.11.22]	-	GO:0004674//protein serine/threonine kinase activity;GO:0032559;GO:0004674//protein serine/threonine kinase activity;GO:0032559;GO:0004674//protein serine/threonine kinase activity;GO:0032559;GO:0004674//protein serine/threonine kinase activity;GO:0032559;GO:0004674//protein serine/threonine kinase activity;GO:0032559	GO:0006464//cellular protein modification process;GO:0006464//cellular protein modification process;GO:0006464//cellular protein modification process;GO:0006464//cellular protein modification process;GO:0006464//cellular protein modification process	gi|567880015|ref|XP_006432566.1|/0/hypothetical protein CICLE_v10003654mg [Citrus clementina]
Cs6g21540	Cs6g21540.1	153.98	133.18	172.69	4972.33	146.55	147.2	108.38	258.54	192.11	63.23	112.28	124.69	172.16	149.86	141.12	97.24	124.9	91.47	gene=Cs6g21540 CDS=1-1770	K01739|1|0.0|953|cit:102621879|cystathionine gamma-synthase [EC:2.5.1.48]	-	GO:0048037//cofactor binding	GO:0019752//carboxylic acid metabolic process	gi|568858174|ref|XP_006482629.1|/0/PREDICTED: cystathionine gamma-synthase, chloroplastic-like [Citrus sinensis]
Cs4g16650	Cs4g16650.1,Cs4g16650.2	153.72	152.92	150.46	4972.33	130.69	167.6	133.95	205.68	160.96	91.19	111.65	121.06	34.24	22.81	30.07	22.18	26.03	16.58	gene=Cs4g16650 CDS=57-1295	K12355|1|0.0|754|cit:102616973|coniferyl-aldehyde dehydrogenase [EC:1.2.1.68]	-	GO:0016620//oxidoreductase activity, acting on the aldehyde or oxo group of donors, NAD or NADP as acceptor;GO:0016620//oxidoreductase activity, acting on the aldehyde or oxo group of donors, NAD or NADP as acceptor	GO:0008152//metabolic process;GO:0008152//metabolic process	gi|568843635|ref|XP_006475705.1|/0/PREDICTED: aldehyde dehydrogenase family 2 member C4-like [Citrus sinensis]
Cs7g28810	Cs7g28810.1	153.31	189.81	147.36	4972.33	159.53	159.08	98.77	135.39	127.41	114.43	122.41	154.24	118.31	107.13	116.33	112.58	148	119.68	gene=Cs7g28810 CDS=192-611	K05765|1|4e-74|278|cit:102609791|cofilin	GO:0044464	GO:0008092//cytoskeletal protein binding	-	gi|567887040|ref|XP_006436042.1|/2.1293e-73/hypothetical protein CICLE_v10033029mg [Citrus clementina]
Cs9g17990	Cs9g17990.1,Cs9g17990.2	152.93	266.58	218.78	4972.33	131.85	109.16	344.62	119.56	165.1	201.74	101.81	106.91	83.88	116.05	82.86	98.57	68.92	83.64	gene=Cs9g17990 CDS=661-6561	K00264|1|0.0|3734|cit:102620225|glutamate synthase (NADPH/NADH) [EC:1.4.1.13 1.4.1.14]	-	GO:0045181//glutamate synthase activity, NAD(P)H as acceptor;GO:0046914//transition metal ion binding;GO:0051540;GO:0050662//coenzyme binding;GO:0000166//nucleotide binding;GO:0045181//glutamate synthase activity, NAD(P)H as acceptor;GO:0046914//transition metal ion binding;GO:0051540;GO:0050662//coenzyme binding;GO:0000166//nucleotide binding	GO:0006536//glutamate metabolic process;GO:0006536//glutamate metabolic process	gi|568874817|ref|XP_006490510.1|/0/PREDICTED: glutamate synthase 1 [NADH], chloroplastic-like isoform X1 [Citrus sinensis]
orange1.1t01847	orange1.1t01847.1	152.76	198.63	154.54	4972.33	190.52	163.17	70.76	75.02	64.18	57.49	67.76	52.65	4.03	2.78	2.3	2.39	1.93	1.78	gene=orange1.1t01847 CDS=157-927	-	-	-	-	gi|567856870|ref|XP_006421118.1|/2.97362e-102/hypothetical protein CICLE_v10005696mg [Citrus clementina]
Cs8g17690	Cs8g17690.1,Cs8g17690.2	152.71	85.02	126.93	4972.33	152.3	223.23	20.69	55.37	34.37	20.69	10.84	26.66	79.86	61.24	66.12	43.82	54.35	37.42	gene=Cs8g17690 CDS=76-387	K11254|1|2e-39|164|gmx:100779597|histone H4	GO:0000785//chromatin;GO:0043231//intracellular membrane-bounded organelle	GO:0003676//nucleic acid binding	GO:0034728//nucleosome organization	gi|641854208|gb|KDO73016.1|/1.31362e-51/hypothetical protein CISIN_1g047769mg, partial [Citrus sinensis]
Cs3g07080	Cs3g07080.1,Cs3g07080.2	152.1	167.31	157.99	4972.33	152.95	133.3	64.12	68.96	70.65	61.37	50.5	50.19	95.19	86.8	74.1	64.68	72.09	61.46	gene=Cs3g07080 CDS=223-807	K13899|1|1e-17|91.7|sita:101764085|cystatin-C	-	GO:0004866//endopeptidase inhibitor activity;GO:0004866//endopeptidase inhibitor activity	GO:0051346//negative regulation of hydrolase activity;GO:0051346//negative regulation of hydrolase activity	gi|568834409|ref|XP_006471323.1|/3.35714e-86/PREDICTED: cysteine proteinase inhibitor 12-like [Citrus sinensis]
orange1.1t05651	orange1.1t05651.1	151.74	154.59	145.9	4972.33	139.22	188.51	0	0	0	0	0	0	0	0	0	0	0	0	gene=orange1.1t05651 CDS=1-252	K13523|1|2e-19|94.4|mtr:MTR_051s0004|lysophosphatidic acid acyltransferase / lysophosphatidylinositol acyltransferase [EC:2.3.1.51 2.3.1.-]	-	GO:0003676//nucleic acid binding;GO:0046914//transition metal ion binding	-	gi|568885968|ref|XP_006495488.1|/4.9726e-34/PREDICTED: zinc finger A20 and AN1 domain-containing stress-associated protein 3-like, partial [Citrus sinensis]
Cs1g13240	Cs1g13240.1,Cs1g13240.2,Cs1g13240.3	151.22	98.21	136.73	4972.33	153.85	178.63	94.08	115.37	99.45	95.53	81.64	103.05	97.77	95.1	87.92	88.13	97.29	88.46	gene=Cs1g13240 CDS=340-786	K02265|1|3e-56|220|cit:102616523|cytochrome c oxidase subunit 5b	-	-	-	gi|568821915|ref|XP_006465387.1|/3.13976e-69/PREDICTED: cytochrome c oxidase subunit 5b-1, mitochondrial-like isoform X2 [Citrus sinensis]
Cs4g10920	Cs4g10920.1,Cs4g10920.2	150.86	154.93	137.63	4972.33	175.96	141.99	377.94	249.08	322.37	488.34	361.68	251.13	156.77	156.4	205.79	213.7	160.84	198.66	gene=Cs4g10920 CDS=94-1314	K03231|1|2e-97|304|cam:105852200|elongation factor 1-alpha	-	GO:0005488;GO:0005488	-	gi|567920616|ref|XP_006452314.1|/0/hypothetical protein CICLE_v10008440mg [Citrus clementina]
Cs8g05230	Cs8g05230.1	150.74	152.18	120.21	4972.33	141.25	135.58	4.9	40.43	21.37	4.48	10.57	24.41	78.01	56.86	39.49	28.99	52.63	22.52	gene=Cs8g05230 CDS=1-1260	K02984|1|3e-65|249|pper:PRUPE_ppa024854mg|small subunit ribosomal protein S3Ae;K17422|2|4e-29|129|mtr:MTR_5g045910|large subunit ribosomal protein L41	-	-	-	gi|641840870|gb|KDO59787.1|/0/hypothetical protein CISIN_1g011101mg [Citrus sinensis]
Cs9g10630	Cs9g10630.1	150.71	76.34	128.79	4972.33	175.99	51.99	520.73	741.12	482.26	519.19	577.9	564.5	464.69	417.47	386.85	337.35	727.85	366.74	gene=Cs9g10630 CDS=342-920	-	-	-	-	gi|302855728|ref|XP_002959345.1|/9.37955e-09/hypothetical protein VOLCADRAFT_100778 [Volvox carteri f. nagariensis]
orange1.1t00726	orange1.1t00726.1	150.14	227.83	275.54	4972.33	89.85	418.05	0	0	0	0	0	0	0	0	0	0	0	0	gene=orange1.1t00726 CDS=1-198	K03809|1|1e-31|134|cic:CICLE_v10016752mg|NAD(P)H dehydrogenase (quinone) [EC:1.6.5.2]	-	GO:0000166//nucleotide binding;GO:0003824//catalytic activity	-	gi|641856878|gb|KDO75644.1|/8.90333e-31/hypothetical protein CISIN_1g028847mg [Citrus sinensis]
Cs7g03280	Cs7g03280.1,Cs7g03280.2,Cs7g03280.3,Cs7g03280.4	149.98	139.85	143.28	4972.33	174.21	176.5	47.76	73.54	62.22	50.1	50.88	51.82	94.75	80.54	91.5	104.49	107.96	95.53	gene=Cs7g03280 CDS=1-1284	K02180|1|1e-178|627|cic:CICLE_v10033345mg|cell cycle arrest protein BUB3	-	GO:0008135//translation factor activity, RNA binding;GO:0003723//RNA binding;GO:0003723//RNA binding;GO:0008135//translation factor activity, RNA binding	GO:0006417//regulation of translation;GO:0006414//translational elongation;GO:0006417//regulation of translation;GO:0006417//regulation of translation;GO:0006417//regulation of translation;GO:0006414//translational elongation	gi|567892507|ref|XP_006438774.1|/5.69958e-178/hypothetical protein CICLE_v10033345mg [Citrus clementina]
Cs9g06490	Cs9g06490.1	149.93	211.65	158.99	4972.33	192.98	145.79	41.77	94.71	94.66	39.05	82.87	73.35	25.65	24.7	30.57	22.94	37.2	20.78	gene=Cs9g06490 CDS=34-1008	K13258|1|1e-91|337|gmx:547489|2-hydroxyisoflavanone dehydratase [EC:4.2.1.105];K03575|2|5e-62|238|rcu:RCOM_1211520|A/G-specific adenine glycosylase [EC:3.2.2.-];K17872|3|2e-48|193|sita:101767448|NADH:ubiquinone reductase (non-electrogenic) [EC:1.6.5.9];K02923|4|7e-43|175|pmum:103335319|large subunit ribosomal protein L38e;K14493|5|4e-32|139|mus:103993737|gibberellin receptor GID1 [EC:3.-.-.-]	-	-	-	gi|568872862|ref|XP_006489582.1|/0/PREDICTED: 2-hydroxyisoflavanone dehydratase-like [Citrus sinensis]
Cs6g07210	Cs6g07210.1	149.87	370.66	173.24	4972.33	260.48	169.6	237.32	181.86	206.14	365.53	331.14	211.57	8.79	17.96	48.2	17.61	28.56	55.1	gene=Cs6g07210 CDS=1-654	-	-	GO:0005488	-	gi|641839040|gb|KDO57975.1|/6.02741e-52/hypothetical protein CISIN_1g043659mg, partial [Citrus sinensis]
Cs6g13400	Cs6g13400.1,Cs6g13400.2,Cs6g13400.3,Cs6g13400.4	149.84	171.98	166.15	4972.33	162.65	140.57	255.13	183.11	247.23	324.39	229.11	228.62	172.36	166.05	164.29	265.13	161.06	231.72	gene=Cs6g13400 CDS=201-1361	K19043|1|0.0|529|cit:102611988|E3 ubiquitin-protein ligase RHF [EC:2.3.2.27]	-	GO:0046872//metal ion binding;GO:0046872//metal ion binding;GO:0046872//metal ion binding;GO:0046872//metal ion binding	-	gi|568856121|ref|XP_006481637.1|/0/PREDICTED: E3 ubiquitin-protein ligase RHF2A-like isoform X1 [Citrus sinensis]
Cs2g05380	Cs2g05380.1,Cs2g05380.2,Cs2g05380.3,Cs2g05380.4	149.49	176.94	146.79	4972.33	157.6	154.2	104.58	132.11	117.22	147.01	136.17	122.79	99.3	108.39	107.51	115.82	115.97	121.12	gene=Cs2g05380 CDS=212-490	-	-	GO:0008135//translation factor activity, RNA binding;GO:0008135//translation factor activity, RNA binding;GO:0008135//translation factor activity, RNA binding;GO:0008135//translation factor activity, RNA binding	GO:0006412//translation;GO:0006412//translation;GO:0006412//translation;GO:0006412//translation	gi|568826700|ref|XP_006467708.1|/7.04398e-25/PREDICTED: transcription elongation factor 1 homolog isoform X1 [Citrus sinensis]
Cs2g27930	Cs2g27930.1,Cs2g27930.2	149.36	167.63	177.1	4972.33	174	159.87	229.13	188.94	208.32	246.02	191.78	185.13	217.08	216.46	226.51	195.67	169.9	206.87	gene=Cs2g27930 CDS=171-716	K07937|1|1e-100|366|mtr:MTR_5g034130|ADP-ribosylation factor 1	GO:0044464;GO:0044464	GO:0032561//guanyl ribonucleotide binding;GO:0003824//catalytic activity;GO:0032561//guanyl ribonucleotide binding;GO:0003824//catalytic activity	GO:0035556//intracellular signal transduction;GO:0015031//protein transport;GO:0035556//intracellular signal transduction;GO:0015031//protein transport	gi|449446863|ref|XP_004141190.1|/2.64352e-100/PREDICTED: ADP-ribosylation factor 1-like [Cucumis sativus]
Cs2g18220	Cs2g18220.1,Cs2g18220.2,Cs2g18220.3,Cs2g18220.4	149.32	167.5	156.14	4972.33	193.62	153.67	404.09	289.21	336.51	431.2	390.35	276.68	395.25	413.55	533.05	399.8	306.87	405.54	gene=Cs2g18220 CDS=406-2055	K12619|1|2e-21|105|bdi:100823403|5'-3' exoribonuclease 2 [EC:3.1.13.-];K10352|2|4e-21|104|pmum:103321923|myosin heavy chain	-	-	-	gi|567911243|ref|XP_006447935.1|/0/hypothetical protein CICLE_v10014710mg [Citrus clementina]
Cs2g15710	Cs2g15710.1	148.81	106.32	121.18	4972.33	139.47	124.34	66.39	112.55	106.45	78.38	132.63	139.27	68.73	68.97	65.55	133.16	106.89	126.03	gene=Cs2g15710 CDS=61-1197	-	-	-	-	gi|568829450|ref|XP_006469036.1|/0/PREDICTED: protein YLS7-like [Citrus sinensis]
Cs5g02620	Cs5g02620.1	148.62	94.54	99.52	4972.33	101.89	89.63	53.05	37.57	67.65	75.15	42.23	43.11	16.69	9.92	10.98	23.89	16.22	23.49	gene=Cs5g02620 CDS=1-234	-	-	-	-	gi|568845133|ref|XP_006476432.1|/1.42098e-25/PREDICTED: arabinogalactan peptide 20-like [Citrus sinensis]
Cs5g01390	Cs5g01390.1	148.54	155.5	159.72	4972.33	156.51	137.69	149.98	136.04	145.88	167.01	152.09	141.14	157.36	169.84	167.12	162.88	164.36	190.11	gene=Cs5g01390 CDS=359-1669	K14768|1|1e-05|53.1|mdm:103410443|U3 small nucleolar RNA-associated protein 7	GO:0031224//intrinsic component of membrane	GO:0004871//signal transducer activity	-	gi|568844818|ref|XP_006476279.1|/0/PREDICTED: protein GPR107-like [Citrus sinensis]
Cs8g16660	Cs8g16660.1	148.53	160.62	137.56	4972.33	171.6	179.64	368.28	272.24	293.32	396.29	310.75	341.97	283.35	225.52	285.87	302.33	307.65	310.02	gene=Cs8g16660 CDS=113-370	-	-	-	-	gi|567863858|ref|XP_006424579.1|/3.72871e-42/hypothetical protein CICLE_v10029701mg [Citrus clementina]
Cs5g34570	Cs5g34570.1,Cs5g34570.2,Cs5g34570.3	148.48	126.36	140.63	4972.33	139.78	135.67	100.25	103.35	94.51	76.7	75.07	69.75	108.72	107	108.27	100.49	107.26	85.44	gene=Cs5g34570 CDS=128-1432	K03062|1|0.0|801|cic:CICLE_v10020143mg|26S proteasome regulatory subunit T2	-	-	-	gi|567902366|ref|XP_006443671.1|/0/hypothetical protein CICLE_v10020143mg [Citrus clementina]
orange1.1t02947	orange1.1t02947.1	147.87	132.09	184.28	4972.33	133.21	175.13	41.32	64.11	66.63	48.78	58.07	81.65	8.21	5.99	7.28	1.4	4.67	0.8	gene=orange1.1t02947 CDS=200-1279	K13066|1|0.0|696|cit:102620533|caffeic acid 3-O-methyltransferase [EC:2.1.1.68]	-	GO:0016740//transferase activity	-	gi|568881295|ref|XP_006493515.1|/0/PREDICTED: anthranilate N-methyltransferase-like [Citrus sinensis]
Cs3g09650	Cs3g09650.1,Cs3g09650.2	147.82	131.8	128.86	4972.33	137.46	176.7	26.89	46.95	31.6	12.51	20.82	29.26	60.69	41.58	48.62	46.76	64.64	39.33	gene=Cs3g09650 CDS=105-383	K08762|1|3e-44|180|cic:CICLE_v10002973mg|diazepam-binding inhibitor (GABA receptor modulator, acyl-CoA-binding protein)	-	GO:0005504//fatty acid binding;GO:0005504//fatty acid binding	GO:0051234//establishment of localization;GO:0051234//establishment of localization	gi|567880517|ref|XP_006432817.1|/8.7659e-45/hypothetical protein CICLE_v10002973mg [Citrus clementina]
Cs5g02000	Cs5g02000.1,Cs5g02000.2,Cs5g02000.3,Cs5g02000.4,Cs5g02000.5,Cs5g02000.6	147.4	175.74	162.35	4972.33	163.92	146.24	246.82	264.42	239.03	277.81	528.34	453.81	363.77	445.18	485.86	398.29	288.93	321.88	gene=Cs5g02000 CDS=492-1325	K10442|1|8e-18|93.2|sly:101268156|kelch-like protein 1/4/5;K10457|2|4e-17|90.9|vvi:100267149|kelch-like protein 20;K16726|3|1e-06|56.2|mis:MICPUN_106342|ankyrin repeat domain-containing protein 17	-	-	-	gi|568844972|ref|XP_006476354.1|/4.2069e-163/PREDICTED: B2 protein-like [Citrus sinensis]
Cs5g29530	Cs5g29530.1,Cs5g29530.2	147.21	155.41	152.23	4972.33	159.9	185.59	242.78	164.89	174.6	276.75	202.32	179.64	185.53	169.73	219.43	142.79	148.06	168.61	gene=Cs5g29530 CDS=139-441	K02875|1|5e-49|194|cic:CICLE_v10022810mg|large subunit ribosomal protein L14e	GO:0030529//intracellular ribonucleoprotein complex;GO:0030529//intracellular ribonucleoprotein complex	GO:0005198//structural molecule activity;GO:0005198//structural molecule activity	GO:0010467//gene expression;GO:0010467//gene expression	gi|567902620|ref|XP_006443798.1|/2.72046e-48/hypothetical protein CICLE_v10022810mg [Citrus clementina]
Cs9g06030	Cs9g06030.1	147.21	43.98	170.3	4972.33	165.06	147.81	27.42	151.41	157.67	40.35	45.03	146.89	242.23	170.25	271.48	171.19	179.48	160.47	gene=Cs9g06030 CDS=1-1311	K00924|1|6e-07|56.2|ath:AT5G22850|	-	GO:0004175//endopeptidase activity	GO:0019538//protein metabolic process	gi|568872271|ref|XP_006489295.1|/0/PREDICTED: basic 7S globulin-like [Citrus sinensis]
Cs8g15720	Cs8g15720.1	147.03	232.56	154.58	4972.33	159.53	186.88	16.06	81.73	78.65	9.39	27.25	16.25	372.86	395.39	465.38	226	302.18	225.95	gene=Cs8g15720 CDS=186-1076	K08235|1|2e-159|563|cit:102630992|xyloglucan:xyloglucosyl transferase [EC:2.4.1.207]	GO:0005576//extracellular region;GO:0030312//external encapsulating structure	GO:0016798//hydrolase activity, acting on glycosyl bonds;GO:0016758//transferase activity, transferring hexosyl groups	GO:0044042//glucan metabolic process	gi|568869617|ref|XP_006488017.1|/9.06635e-159/PREDICTED: probable xyloglucan endotransglucosylase/hydrolase protein 31-like [Citrus sinensis]
Cs8g17260	Cs8g17260.1,Cs8g17260.2,Cs8g17260.3	146.99	112.32	136.87	4972.33	152.08	187.91	50.63	52.39	40.54	39.92	30.5	31.55	124.97	128.28	110.15	100.76	120.35	95.6	gene=Cs8g17260 CDS=104-514	K02973|1|2e-77|290|zma:103625771|small subunit ribosomal protein S23e	GO:0030529//intracellular ribonucleoprotein complex;GO:0030529//intracellular ribonucleoprotein complex;GO:0030529//intracellular ribonucleoprotein complex	GO:0005198//structural molecule activity;GO:0005198//structural molecule activity;GO:0005198//structural molecule activity	GO:0010467//gene expression;GO:0010467//gene expression;GO:0010467//gene expression	gi|661889986|emb|CDP06706.1|/6.65079e-76/unnamed protein product [Coffea canephora]
Cs8g15030	Cs8g15030.1,Cs8g15030.2,Cs8g15030.3,Cs8g15030.4	146.98	215.61	155.21	4972.33	146.01	139.82	182.92	172.59	200.98	163.85	147.14	86.77	98.53	94.46	100.85	140.56	95.01	113.87	gene=Cs8g15030 CDS=310-1368	K14431|1|0.0|727|cit:102611523|transcription factor TGA	GO:0043231//intracellular membrane-bounded organelle;GO:0043231//intracellular membrane-bounded organelle;GO:0043231//intracellular membrane-bounded organelle;GO:0043231//intracellular membrane-bounded organelle	GO:0003677//DNA binding;GO:0001071//nucleic acid binding transcription factor activity;GO:0005515//protein binding;GO:0003677//DNA binding;GO:0001071//nucleic acid binding transcription factor activity;GO:0005515//protein binding;GO:0003677//DNA binding;GO:0001071//nucleic acid binding transcription factor activity;GO:0005515//protein binding;GO:0003677//DNA binding;GO:0001071//nucleic acid bindi…	GO:0006351//transcription, DNA-templated;GO:0006351//transcription, DNA-templated;GO:0006351//transcription, DNA-templated;GO:0006351//transcription, DNA-templated	gi|568869483|ref|XP_006487952.1|/0/PREDICTED: TGACG-sequence-specific DNA-binding protein TGA-2.1-like isoform X5 [Citrus sinensis]
Cs5g03140	Cs5g03140.1,Cs5g03140.2	146.43	84.31	125.31	4972.33	126.4	166.92	61.6	79.7	54.1	68.3	48.78	49.98	97.35	95.88	81.72	63.68	92.59	62.36	gene=Cs5g03140 CDS=458-868	K02947|1|1e-51|204|cit:102616288|small subunit ribosomal protein S10e;K09422|4|2e-49|197|csv:101214080|myb proto-oncogene protein, plant	-	-	-	gi|568845277|ref|XP_006476503.1|/1.48872e-51/PREDICTED: 40S ribosomal protein S10-like [Citrus sinensis]
Cs2g25450	Cs2g25450.1	146.31	250.2	231.36	4972.33	151.57	171.17	191.58	209.14	157.75	262.51	267.95	231.2	178.77	195.91	170.22	246.5	113.14	154.23	gene=Cs2g25450 CDS=127-1107	K00430|1|2e-169|596|cit:102612835|peroxidase [EC:1.11.1.7]	-	GO:0005506//iron ion binding;GO:0003824//catalytic activity;GO:0016209//antioxidant activity	GO:0008152//metabolic process;GO:0006950//response to stress	gi|568831661|ref|XP_006470079.1|/8.82742e-169/PREDICTED: peroxidase 55-like [Citrus sinensis]
Cs5g07370	Cs5g07370.1	145.87	90.63	137.01	4972.33	130.78	185.53	95.65	151.7	146.55	120.91	114.22	153.94	191.8	170.29	146.53	148.85	161.97	137.85	gene=Cs5g07370 CDS=96-698	K02134|1|2e-95|349|cit:102614928|F-type H+-transporting ATPase subunit delta	GO:0033178//proton-transporting two-sector ATPase complex, catalytic domain	GO:0015078//hydrogen ion transmembrane transporter activity;GO:0019829//cation-transporting ATPase activity;GO:0032559	GO:0015986//ATP synthesis coupled proton transport	gi|568846394|ref|XP_006477040.1|/9.86872e-95/PREDICTED: ATP synthase subunit delta', mitochondrial-like [Citrus sinensis]
orange1.1t02505	orange1.1t02505.1	145.85	177.5	164.35	4972.33	192.41	155.13	467.16	250.09	329.04	370.1	318.73	251.97	370.58	423.88	438.31	312.52	235.27	298.58	gene=orange1.1t02505 CDS=187-1797	K15191|1|1e-156|554|cit:102615388|La-related protein 7	-	GO:0005488	-	gi|568880450|ref|XP_006493132.1|/5.52763e-156/PREDICTED: lateral signaling target protein 2 homolog [Citrus sinensis]
Cs7g16620	Cs7g16620.1,Cs7g16620.2,Cs7g16620.3,Cs7g16620.4,Cs7g16620.5	145.72	135.27	150.48	4972.33	157.62	155.29	259.36	199.65	179.87	162.93	186.99	178.85	136.49	131.66	203.39	208.87	341.5	505.79	gene=Cs7g16620 CDS=261-1979	K09571|1|0.0|983|cic:CICLE_v10031088mg|FK506-binding protein 4/5 [EC:5.2.1.8]	-	GO:0016859//cis-trans isomerase activity;GO:0016859//cis-trans isomerase activity;GO:0016859//cis-trans isomerase activity;GO:0016859//cis-trans isomerase activity;GO:0016859//cis-trans isomerase activity	GO:0044267//cellular protein metabolic process;GO:0044267//cellular protein metabolic process;GO:0044267//cellular protein metabolic process;GO:0044267//cellular protein metabolic process;GO:0044267//cellular protein metabolic process	gi|567889446|ref|XP_006437245.1|/0/hypothetical protein CICLE_v10031088mg [Citrus clementina]
Cs9g03580	Cs9g03580.1	145.29	301.11	218.02	4972.33	164.93	143.33	31.65	50.11	41.57	27.42	51.86	65.09	52.43	41.86	58.56	100.44	93.48	86.61	gene=Cs9g03580 CDS=102-587	K02553|1|5e-15|82.0|bvg:104906773|regulator of ribonuclease activity A	-	-	-	gi|568871672|ref|XP_006489006.1|/3.12075e-87/PREDICTED: major allergen Pru ar 1-like [Citrus sinensis]
Cs7g18480	Cs7g18480.1,Cs7g18480.2	145.17	102.98	141.83	4972.33	157.51	189.5	455.45	275.5	301.66	402.55	259.62	249.88	200.36	208.69	224.36	162.13	177.29	164.53	gene=Cs7g18480 CDS=175-1023	K11276|1|2e-45|184|jcu:105637357|nucleophosmin 1	-	GO:0005488	-	gi|568863057|ref|XP_006484979.1|/9.69827e-114/PREDICTED: histone deacetylase HDT1-like isoform X1 [Citrus sinensis]
Cs5g15160	Cs5g15160.1	145.13	125.6	150.71	4972.33	146.61	187.77	51.58	106.79	67.55	26.46	37.29	62.36	5.79	3.85	5.23	3.5	5.54	3.94	gene=Cs5g15160 CDS=174-833	K00799|1|4e-127|455|cit:102621779|glutathione S-transferase [EC:2.5.1.18]	-	GO:0016846//carbon-sulfur lyase activity;GO:0016765//transferase activity, transferring alkyl or aryl (other than methyl) groups	GO:0009755//hormone-mediated signaling pathway	gi|568848358|ref|XP_006477979.1|/2.13672e-126/PREDICTED: probable glutathione S-transferase-like [Citrus sinensis]
Cs5g30100	Cs5g30100.1,Cs5g30100.2	145.1	190.14	143.9	4972.33	236.99	204.71	367.99	287.95	373.59	452.58	510.29	332.06	53.15	48.31	76.15	103.81	64.6	102.04	gene=Cs5g30100 CDS=195-563	K08504|1|6e-63|241|cic:CICLE_v10022892mg|blocked early in transport 1	-	-	-	gi|567902776|ref|XP_006443876.1|/2.73222e-62/hypothetical protein CICLE_v10022892mg [Citrus clementina]
Cs1g20730	Cs1g20730.1	144.93	94.11	131.46	4972.33	144.04	159.77	105.52	75.05	61.35	60.6	43.74	44.17	85.11	89.82	77.12	63.25	90.36	81.01	gene=Cs1g20730 CDS=211-909	K02985|1|4e-126|452|cic:CICLE_v10026299mg|small subunit ribosomal protein S3e	GO:0030529//intracellular ribonucleoprotein complex	GO:0003676//nucleic acid binding;GO:0005198//structural molecule activity	GO:0010467//gene expression	gi|567867189|ref|XP_006426217.1|/2.14255e-125/hypothetical protein CICLE_v10026299mg [Citrus clementina]
Cs3g21590	Cs3g21590.1	144.59	103.54	141.85	4972.33	152.45	164.05	124.57	109.86	89.09	83.17	63.23	61.6	103.32	104.65	96.83	65.44	82.68	64.14	gene=Cs3g21590 CDS=1-2874	K02925|1|0.0|746|cic:CICLE_v10001454mg|large subunit ribosomal protein L3e	GO:0030529//intracellular ribonucleoprotein complex	GO:0005198//structural molecule activity	GO:0010467//gene expression	gi|568839816|ref|XP_006473872.1|/0/PREDICTED: (-)-germacrene D synthase-like [Citrus sinensis]
Cs4g17340	Cs4g17340.1	144.53	162.1	144.28	4972.33	160.33	215.29	39.01	46.54	51.34	49.98	41.35	22.06	62.6	31.26	43.37	49.58	26.49	51.58	gene=Cs4g17340 CDS=1-387	-	-	-	-	gi|568843789|ref|XP_006475781.1|/9.58465e-70/PREDICTED: uncharacterized protein LOC102611870 [Citrus sinensis]
orange1.1t00214	orange1.1t00214.1	143.82	42.42	103.03	4972.33	75.65	170.78	12.27	60.57	60.58	87.43	23.07	77.99	87.12	57.53	71.6	130.58	41.81	113.75	gene=orange1.1t00214 CDS=42-1574	K01051|1|0.0|1004|cic:CICLE_v10019773mg|pectinesterase [EC:3.1.1.11]	GO:0030312//external encapsulating structure	GO:0030234//enzyme regulator activity	GO:0071555//cell wall organization;GO:0045229//external encapsulating structure organization	gi|567905620|ref|XP_006445298.1|/0/hypothetical protein CICLE_v10019773mg [Citrus clementina]
orange1.1t06019	orange1.1t06019.1	143.79	151.3	45.22	4972.33	213.76	234.78	0.41	30.77	21.52	4.85	31.41	65.04	0	0.36	0	0.75	0	0.37	gene=orange1.1t06019 CDS=282-468	-	-	-	-	gi|568833630|ref|XP_006470987.1|/5.84988e-10/PREDICTED: uncharacterized protein LOC102578057 [Citrus sinensis]
Cs3g20790	Cs3g20790.1	143.59	135.62	142.6	4972.33	136.15	148.46	120.85	86.41	106.37	167.97	132.9	101.41	164.75	143.28	161.62	133.35	123.06	111.43	gene=Cs3g20790 CDS=568-1470	K09874|1|9e-150|531|cit:102616276|aquaporin NIP	GO:0031224//intrinsic component of membrane	-	GO:0051234//establishment of localization	gi|568837815|ref|XP_006472916.1|/5.26395e-149/PREDICTED: probable aquaporin NIP5-1-like [Citrus sinensis]
Cs1g02300	Cs1g02300.1,Cs1g02300.2,Cs1g02300.3	143.56	166.03	155.31	4972.33	162.26	162.71	137.95	140.77	132.98	131.13	133.47	122.12	195.07	198.12	179.92	167.32	192.23	168.5	gene=Cs1g02300 CDS=406-996	-	-	-	-	gi|568819532|ref|XP_006464303.1|/3.69148e-17/PREDICTED: retrotransposon-like protein 1-like [Citrus sinensis]
Cs2g10840	Cs2g10840.1	143.47	134.61	137.11	4972.33	130.46	150.25	106.61	122.03	113.34	93.03	90.4	94.46	119.99	112.2	128.65	130.88	131.58	119.41	gene=Cs2g10840 CDS=183-785	K07889|1|8e-100|364|mdm:103446058|Ras-related protein Rab-5C	-	GO:0032561//guanyl ribonucleotide binding	GO:0006810//transport;GO:0035556//intracellular signal transduction	gi|567912847|ref|XP_006448737.1|/1.78962e-108/hypothetical protein CICLE_v10016769mg [Citrus clementina]
Cs9g03300	Cs9g03300.1,Cs9g03300.2,Cs9g03300.3	143.08	90.52	130.46	4972.33	139.86	135.56	201.77	150.36	113.17	144.17	107.53	123.95	153.9	150.73	152.44	181.03	259.37	322.22	gene=Cs9g03300 CDS=228-1649	K04077|1|0.0|834|cic:CICLE_v10014640mg|chaperonin GroEL	GO:0044424;GO:0044424;GO:0044424	GO:0005515//protein binding;GO:0032559;GO:0005515//protein binding;GO:0032559;GO:0005515//protein binding;GO:0032559	GO:0006457//protein folding;GO:0006457//protein folding;GO:0006457//protein folding	gi|641835502|gb|KDO54477.1|/0/hypothetical protein CISIN_1g007313mg [Citrus sinensis]
Cs3g20840	Cs3g20840.1,Cs3g20840.2	142.51	35.88	138.37	4972.33	88.12	108.14	646.65	191.3	714.27	955.91	573.62	573.61	252.54	377.57	182.95	749.54	341.24	970.69	gene=Cs3g20840 CDS=41-1363	K03921|1|0.0|753|cit:102618601|acyl-[acyl-carrier-protein] desaturase [EC:1.14.19.2]	GO:0009536//plastid;GO:0009536//plastid	GO:0046872//metal ion binding;GO:0016717//oxidoreductase activity, acting on paired donors, with oxidation of a pair of donors resulting in the reduction of molecular oxygen to two molecules of water;GO:0046872//metal ion binding;GO:0016717//oxidoreductase activity, acting on paired donors, with oxidation of a pair of donors resulting in the reduction of molecular oxygen to two molecules of water	GO:0006631//fatty acid metabolic process;GO:0006631//fatty acid metabolic process	gi|568837833|ref|XP_006472924.1|/0/PREDICTED: acyl-[acyl-carrier-protein] desaturase 6, chloroplastic-like [Citrus sinensis]
Cs7g29220	Cs7g29220.1,Cs7g29220.2,Cs7g29220.3	142.45	122.78	137.76	4972.33	145.04	159.35	115.94	115.21	115.45	119.18	85.31	102.41	151.76	148.45	124.17	122.93	115.27	116.67	gene=Cs7g29220 CDS=106-1104	K10355|1|0.0|716|cic:CICLE_v10031847mg|actin, other eukaryote	GO:0043232;GO:0043232;GO:0043232	GO:0032559;GO:0032559;GO:0032559	-	gi|567886932|ref|XP_006435988.1|/0/hypothetical protein CICLE_v10031847mg [Citrus clementina]
Cs2g17260	Cs2g17260.1	142.28	172.44	148.51	4972.33	146.63	141.42	77.94	99.33	117.1	161.47	162.56	156.95	73.88	66.7	74.48	111.25	88.12	87.4	gene=Cs2g17260 CDS=194-1063	K04730|1|3e-15|84.3|pper:PRUPE_ppa025419mg|interleukin-1 receptor-associated kinase 1 [EC:2.7.11.1];K04733|5|2e-10|68.2|jcu:105650118|interleukin-1 receptor-associated kinase 4 [EC:2.7.11.1]	-	-	-	gi|568829865|ref|XP_006469236.1|/4.19925e-123/PREDICTED: cysteine-rich repeat secretory protein 12-like [Citrus sinensis]
orange1.1t05402	orange1.1t05402.1	142.22	45.45	85.16	4972.33	58.99	125.37	0	58.66	55.69	0.27	4.99	20.82	0	0	0	0	0.29	0	gene=orange1.1t05402 CDS=1-626	K00430|1|2e-116|417|cit:102627605|peroxidase [EC:1.11.1.7]	-	GO:0005506//iron ion binding;GO:0003824//catalytic activity;GO:0016209//antioxidant activity	GO:0008152//metabolic process;GO:0006950//response to stress	gi|568827622|ref|XP_006468150.1|/1.195e-115/PREDICTED: peroxidase 52-like [Citrus sinensis]
orange1.1t00931	orange1.1t00931.1	142.22	168	147.72	4972.33	162.96	172.44	199.7	235.61	224.28	153.8	190.68	187.62	222.85	214.99	181.1	215.14	237.79	202.53	gene=orange1.1t00931 CDS=72-314	-	GO:0031410//cytoplasmic vesicle	-	-	gi|568877330|ref|XP_006491692.1|/1.78935e-31/PREDICTED: uncharacterized protein LOC102612124 [Citrus sinensis]
Cs1g16240	Cs1g16240.1	142.04	107.94	140.85	4972.33	155.96	189	63.48	106.28	100.94	87.78	72.47	95.18	119.46	93.93	82.35	92.83	107.76	92.35	gene=Cs1g16240 CDS=93-491	K03950|1|9e-70|262|cit:102608946|NADH dehydrogenase (ubiquinone) 1 alpha subcomplex subunit 6	-	-	-	gi|568822695|ref|XP_006465764.1|/4.36e-69/PREDICTED: NADH dehydrogenase [ubiquinone] 1 alpha subcomplex subunit 6-like [Citrus sinensis]
Cs9g13720	Cs9g13720.1	142.01	141.32	144.86	4972.33	136.93	152.18	91.21	147.01	128.39	102.9	120.04	130.95	123.17	111.27	115.15	127.87	98.56	126.63	gene=Cs9g13720 CDS=1-843	K07874|1|3e-113|409|cit:102628383|Ras-related protein Rab-1A	-	GO:0032561//guanyl ribonucleotide binding;GO:0003824//catalytic activity	GO:0006810//transport;GO:0035556//intracellular signal transduction	gi|568873817|ref|XP_006490023.1|/1.43259e-112/PREDICTED: ras-related protein RABD2a-like [Citrus sinensis]
Cs9g07640	Cs9g07640.1,Cs9g07640.2	142.01	176.1	149.72	4972.33	166.27	151.51	180.37	179.22	173.16	143.48	159.78	146.13	145.57	125.99	148.37	162.21	176.12	179.15	gene=Cs9g07640 CDS=487-1077	K08967|1|1e-116|420|cit:102625112|1,2-dihydroxy-3-keto-5-methylthiopentene dioxygenase [EC:1.13.11.53 1.13.11.54]	-	GO:0043169//cation binding;GO:0016701//oxidoreductase activity, acting on single donors with incorporation of molecular oxygen;GO:0043169//cation binding;GO:0016701//oxidoreductase activity, acting on single donors with incorporation of molecular oxygen	GO:0043102;GO:0043102	gi|641855674|gb|KDO74454.1|/5.85781e-146/hypothetical protein CISIN_1g025302mg [Citrus sinensis]
Cs6g16680	Cs6g16680.1	141.56	272.93	159.36	4972.33	162.6	108.32	52.2	32.31	32.46	8.77	8.64	15.32	120.61	108.62	109.19	129.36	145.97	96.14	gene=Cs6g16680 CDS=95-1312	K01623|1|7e-57|222|pda:103722777|fructose-bisphosphate aldolase, class I [EC:4.1.2.13];K02940|2|2e-50|201|sita:101773010|large subunit ribosomal protein L9e	GO:0044464	-	-	gi|568856938|ref|XP_006482028.1|/0/PREDICTED: WAT1-related protein At5g07050-like [Citrus sinensis]
Cs2g29965	Cs2g29965.2,Cs2g29965.3	141.52	124.26	105.12	4972.33	116.81	179.31	55.46	45.57	49	39.85	37.41	35.85	73.86	82.21	59.78	80.75	88.31	67.95	gene=Cs2g29965 CDS=90-204	K18178|1|4e-18|79.0|cit:102619955|cytochrome c oxidase assembly factor 5	-	-	-	gi|567907567|ref|XP_006446097.1|/2.90932e-17/hypothetical protein CICLE_v10017354mg [Citrus clementina]
Cs7g32500	Cs7g32500.1,Cs7g32500.2,Cs7g32500.3	141.2	89	144.48	4972.33	137.22	142.92	161.61	77.61	106.1	175.46	103.92	154.59	124.78	124.62	100.15	166.59	114.45	163.47	gene=Cs7g32500 CDS=343-1056	K01803|1|4e-113|409|cic:CICLE_v10032537mg|triosephosphate isomerase (TIM) [EC:5.3.1.1]	GO:0044424;GO:0044424	GO:0016861//intramolecular oxidoreductase activity, interconverting aldoses and ketoses;GO:0016861//intramolecular oxidoreductase activity, interconverting aldoses and ketoses;GO:0016861//intramolecular oxidoreductase activity, interconverting aldoses and ketoses	GO:0006007//glucose catabolic process;GO:0006631//fatty acid metabolic process;GO:0006007//glucose catabolic process;GO:0006631//fatty acid metabolic process	gi|567886028|ref|XP_006435536.1|/2.02308e-112/hypothetical protein CICLE_v10032537mg [Citrus clementina]
orange1.1t03237	orange1.1t03237.1,orange1.1t03237.2	141.2	137.31	119.24	4972.33	148.83	131.1	123.1	164.79	139.18	94.31	115.71	114.96	80.03	77.88	84.65	71.9	71.15	65.51	gene=orange1.1t03237 CDS=176-1429	K14848|1|3e-16|88.2|sita:101766449|ribosome assembly protein RRB1	-	GO:0004175//endopeptidase activity;GO:0004175//endopeptidase activity	GO:0019538//protein metabolic process;GO:0019538//protein metabolic process	gi|568881796|ref|XP_006493737.1|/0/PREDICTED: metacaspase-4-like [Citrus sinensis]
Cs2g05930	Cs2g05930.1	141.09	119.48	103.89	4972.33	143.18	167.74	119.56	250.19	228.85	109.19	160.62	214.29	454.17	495.62	519.92	489.13	840.08	707.31	gene=Cs2g05930 CDS=104-925	-	-	GO:0005198//structural molecule activity	-	gi|568827757|ref|XP_006468215.1|/1.17654e-47/PREDICTED: extensin-like [Citrus sinensis]
Cs4g16820	Cs4g16820.1,Cs4g16820.2	140.63	164.78	147.02	4972.33	119.36	125.29	38.36	78.98	74.47	73.68	83.38	96.13	63.75	56.98	61.38	68.7	73.72	77.91	gene=Cs4g16820 CDS=243-689	K18823|1|4e-98|360|pvu:PHAVU_006G208300g|soyasaponin III rhamnosyltransferase [EC:2.4.1.273];K12937|5|5e-56|220|vvi:100247125|cyanidin-3-O-glucoside 2''-O-glucuronosyltransferase [EC:2.4.1.254]	GO:0044464	-	-	gi|567918170|ref|XP_006451091.1|/0/hypothetical protein CICLE_v10010307mg [Citrus clementina]
Cs5g02430	Cs5g02430.1	140.18	146.31	141.04	4972.33	188.83	227.95	2.65	25.31	26.45	6.45	20.23	41.84	142.86	175.11	178.68	186.65	405.76	304.42	gene=Cs5g02430 CDS=85-618	-	-	-	-	gi|568845066|ref|XP_006476399.1|/5.04691e-78/PREDICTED: uncharacterized protein LOC102614628 [Citrus sinensis]
Cs5g06010	Cs5g06010.1	139.67	114.03	128.94	4972.33	143.76	157.35	137.86	108.05	113.75	134.91	89.56	81.75	89.03	90.55	97.24	82.84	88.64	87.23	gene=Cs5g06010 CDS=280-720	K02900|1|3e-82|306|cit:102618706|large subunit ribosomal protein L27Ae	GO:0030529//intracellular ribonucleoprotein complex	GO:0005198//structural molecule activity	GO:0010467//gene expression	gi|568846046|ref|XP_006476869.1|/1.94715e-81/PREDICTED: 60S ribosomal protein L27a-3-like [Citrus sinensis]
orange1.1t02616	orange1.1t02616.1,orange1.1t02616.2	139.64	101.84	136.64	4972.33	137.99	161.28	138.29	120.89	105.79	94.83	92.4	91.45	112.02	112.96	94.87	73.73	103.67	78.62	gene=orange1.1t02616 CDS=145-795	K03452|1|4e-87|324|vvi:100250295|magnesium/proton exchanger;K11000|2|3e-85|317|bvg:104900835|callose synthase [EC:2.4.1.-];K03798|3|8e-84|313|rcu:RCOM_0340700|cell division protease FtsH [EC:3.4.24.-]	GO:0030529//intracellular ribonucleoprotein complex	GO:0046914//transition metal ion binding;GO:0005198//structural molecule activity	GO:0010467//gene expression;GO:0022613//ribonucleoprotein complex biogenesis	gi|568880686|ref|XP_006493241.1|/0/PREDICTED: pentatricopeptide repeat-containing protein At5g66520-like [Citrus sinensis]
Cs3g14260	Cs3g14260.1,Cs3g14260.2	139.58	95.17	131.89	4972.33	154.7	189.56	73.87	106.37	96.42	116.73	84.6	76.81	119.1	112.36	100.19	89.86	99.71	89.99	gene=Cs3g14260 CDS=357-605	K02971|1|5e-41|170|cic:CICLE_v10003006mg|small subunit ribosomal protein S21e	GO:0030529//intracellular ribonucleoprotein complex;GO:0030529//intracellular ribonucleoprotein complex	GO:0005198//structural molecule activity;GO:0005198//structural molecule activity	GO:0010467//gene expression;GO:0010467//gene expression	gi|567881695|ref|XP_006433406.1|/2.48297e-40/hypothetical protein CICLE_v10003006mg [Citrus clementina]
Cs5g33220	Cs5g33220.1	139.43	96.6	126.43	4972.33	135.4	169.74	81.15	70.12	49.7	48.24	28.93	40.55	105.21	104.28	80.54	76.16	100.34	64.36	gene=Cs5g33220 CDS=186-563	K02891|1|2e-45|183|cic:CICLE_v10022870mg|large subunit ribosomal protein L22e	GO:0030529//intracellular ribonucleoprotein complex	GO:0005198//structural molecule activity	GO:0010467//gene expression	gi|567903746|ref|XP_006444361.1|/1.08634e-44/hypothetical protein CICLE_v10022870mg [Citrus clementina]
Cs3g23150	Cs3g23150.1	139.11	145.75	138.57	4972.33	159.47	160.46	116.35	98.26	114.45	140.66	110.85	102.94	89.27	86.51	86.85	68.86	86.64	73.7	gene=Cs3g23150 CDS=304-1011	K09660|1|5e-124|445|cit:102622747|mannose-P-dolichol utilization defect 1	-	-	-	gi|568838549|ref|XP_006473273.1|/2.55501e-123/PREDICTED: mannose-P-dolichol utilization defect 1 protein homolog 2-like [Citrus sinensis]
Cs5g05540	Cs5g05540.1	139.02	179.5	155.86	4972.33	126.73	90.93	105.8	105.94	97.54	69.26	100.73	64.17	73.33	79.02	70.55	70.37	75.98	60.5	gene=Cs5g05540 CDS=1219-3363	K13855|1|4e-45|184|mis:MICPUN_56639|solute carrier family 4 (anion exchanger), member 2;K13862|2|3e-29|132|ccp:CHC_T00008463001|solute carrier family 4 (sodium borate transporter), member 11	GO:0031224//intrinsic component of membrane	GO:0015301//anion:anion antiporter activity	GO:0006811//ion transport	gi|568845870|ref|XP_006476787.1|/0/PREDICTED: probable boron transporter 2-like [Citrus sinensis]
Cs1g09840	Cs1g09840.1,Cs1g09840.2	139.01	77.63	112.91	4972.33	119.17	124.26	97.63	102.86	98.95	78.15	83.61	115.8	94.23	104.97	95.4	95.51	102.52	99.71	gene=Cs1g09840 CDS=173-2647	K16302|1|2e-158|561|atr:18445813|metal transporter CNNM	-	-	-	gi|567879191|ref|XP_006432154.1|/0/hypothetical protein CICLE_v10000328mg [Citrus clementina]
Cs7g16610	Cs7g16610.1	138.84	104.39	126.84	4972.33	123.31	157.43	108.09	138.18	123.6	98.44	76.98	109.02	150.94	130.21	128.64	112.64	142.93	136.57	gene=Cs7g16610 CDS=76-537	K09569|1|7e-81|301|cic:CICLE_v10032978mg|FK506-binding protein 2 [EC:5.2.1.8]	GO:0031410//cytoplasmic vesicle	GO:0016859//cis-trans isomerase activity	GO:0044267//cellular protein metabolic process	gi|567889448|ref|XP_006437246.1|/4.02528e-80/hypothetical protein CICLE_v10032978mg [Citrus clementina]
Cs8g06890	Cs8g06890.1	138.76	186.31	150.7	4972.33	144.35	138.48	189.27	183.71	204.7	276.39	203.96	202.47	183.13	185.36	184.1	251.11	193.38	246.41	gene=Cs8g06890 CDS=1-801	K10579|1|2e-105|382|cic:CICLE_v10029365mg|ubiquitin-conjugating enzyme E2 M	-	GO:0016879//ligase activity, forming carbon-nitrogen bonds;GO:0032559	GO:0006464//cellular protein modification process	gi|567861102|ref|XP_006423205.1|/1.18445e-104/hypothetical protein CICLE_v10029365mg [Citrus clementina]
Cs1g14480	Cs1g14480.1,Cs1g14480.2,Cs1g14480.3	138.49	115.56	138.87	4972.33	141.93	132.46	235.49	188.58	180.96	210.16	184.58	180.74	139.96	162.31	186.34	166.15	201.19	332.53	gene=Cs1g14480 CDS=221-2779	K09489|1|0.0|1284|cit:102619242|heat shock 70kDa protein 4	-	GO:0016628//oxidoreductase activity, acting on the CH-CH group of donors, NAD or NADP as acceptor;GO:0032559;GO:0016628//oxidoreductase activity, acting on the CH-CH group of donors, NAD or NADP as acceptor;GO:0032559;GO:0016628//oxidoreductase activity, acting on the CH-CH group of donors, NAD or NADP as acceptor;GO:0032559	GO:0008152//metabolic process;GO:0050896//response to stimulus;GO:0008152//metabolic process;GO:0050896//response to stimulus;GO:0008152//metabolic process;GO:0050896//response to stimulus	gi|641832150|gb|KDO51190.1|/0/hypothetical protein CISIN_1g003056mg [Citrus sinensis]
orange1.1t00478	orange1.1t00478.1,orange1.1t00478.2	138.33	202.16	159.09	4972.33	183.48	132.38	215.98	129.19	175.85	220.74	159.66	108.68	174.4	170.05	158.96	157.09	100.9	128.54	gene=orange1.1t00478 CDS=234-794	K14496|1|4e-104|379|cic:CICLE_v10022440mg|abscisic acid receptor PYR/PYL family	-	-	-	gi|567904764|ref|XP_006444870.1|/2.01363e-103/hypothetical protein CICLE_v10022440mg [Citrus clementina]
Cs9g12460	Cs9g12460.1,Cs9g12460.2,Cs9g12460.3,Cs9g12460.4	138.18	227.52	154.14	4972.33	176.01	109.59	147.94	149.59	121.35	117.32	158.08	108.19	127.02	101.84	128.01	73.53	85.83	56.01	gene=Cs9g12460 CDS=166-2490	K06617|1|0.0|1603|cit:102622912|raffinose synthase [EC:2.4.1.82]	-	-	-	gi|568873619|ref|XP_006489931.1|/0/PREDICTED: probable galactinol--sucrose galactosyltransferase 2-like isoform X1 [Citrus sinensis]
Cs3g11480	Cs3g11480.1	137.74	175.63	147.25	4972.33	144.71	140.32	119.55	118.43	113.13	96.13	90.31	86.12	91.97	83.16	86.4	93.32	86.2	81.21	gene=Cs3g11480 CDS=313-1290	K01738|1|5e-162|572|cic:CICLE_v10001835mg|cysteine synthase A [EC:2.5.1.47]	GO:0044424	GO:0016835//carbon-oxygen lyase activity;GO:0016765//transferase activity, transferring alkyl or aryl (other than methyl) groups;GO:0048037//cofactor binding	GO:0006563//L-serine metabolic process;GO:0000097//sulfur amino acid biosynthetic process	gi|641834284|gb|KDO53280.1|/3.06279e-161/hypothetical protein CISIN_1g020528mg [Citrus sinensis]
Cs6g18740	Cs6g18740.1,Cs6g18740.2,Cs6g18740.3,Cs6g18740.4	137.69	158.53	143.8	4972.33	153.7	135.32	241.26	197.69	240.77	332.35	291.39	227.38	162.65	155.12	170.35	153.36	140.27	165.52	gene=Cs6g18740 CDS=178-1368	K10839|1|3e-157|556|cit:102614644|UV excision repair protein RAD23	GO:0043231//intracellular membrane-bounded organelle	GO:0003677//DNA binding	GO:0006511//ubiquitin-dependent protein catabolic process;GO:0006281//DNA repair	gi|568857414|ref|XP_006482261.1|/6.03498e-158/PREDICTED: ubiquitin receptor RAD23c-like isoform X2 [Citrus sinensis]
Cs6g06310	Cs6g06310.1	137.6	240.56	171.99	4972.33	208.8	121.3	312.32	284.68	269.96	361.33	380.56	308.24	103.99	92.79	141.26	177.14	152.79	184.45	gene=Cs6g06310 CDS=487-678	K10403|1|1e-58|229|cic:CICLE_v10011247mg|kinesin family member 22	-	GO:0003774//motor activity;GO:0000166//nucleotide binding	GO:0009987//cellular process	gi|641824836|gb|KDO44142.1|/7.85431e-58/hypothetical protein CISIN_1g005372mg [Citrus sinensis]
Cs5g27970	Cs5g27970.1	137.55	132.57	143.55	4972.33	139.04	172.93	68.34	122.72	117.87	91.93	104.69	135.15	172.56	162.22	150.99	172.63	197.07	178.63	gene=Cs5g27970 CDS=199-603	K10534|1|8e-18|91.7|vcn:VOLCADRAFT_76569|nitrate reductase (NAD(P)H) [EC:1.7.1.1 1.7.1.2 1.7.1.3]	-	GO:0008940//nitrate reductase activity;GO:0005506//iron ion binding	GO:0008152//metabolic process	gi|567902230|ref|XP_006443603.1|/4.59276e-65/hypothetical protein CICLE_v10022818mg [Citrus clementina]
Cs7g28200	Cs7g28200.1	137.42	90.28	130.33	4972.33	127.1	160.25	100.14	103.8	85.29	104.56	72.03	74.72	124.5	118.08	94.42	86.33	98.02	80.42	gene=Cs7g28200 CDS=128-499	K02918|1|5e-51|202|cic:CICLE_v10033083mg|large subunit ribosomal protein L35e	GO:0030529//intracellular ribonucleoprotein complex	GO:0005198//structural molecule activity	GO:0010467//gene expression	gi|567887220|ref|XP_006436132.1|/2.73593e-50/hypothetical protein CICLE_v10033083mg [Citrus clementina]
Cs1g01860	Cs1g01860.1,Cs1g01860.2	137.37	207.21	164.11	4972.33	174.98	110.41	30.43	35.53	32.27	36.01	54.08	93.51	26.89	23.82	15.1	33.34	19.44	29.57	gene=Cs1g01860 CDS=428-889	K10752|1|1e-32|141|mdm:103421028|histone-binding protein RBBP4;K07213|2|1e-09|64.7|egr:104454107|copper chaperone;K00430|3|2e-09|64.3|mdm:103431979|peroxidase [EC:1.11.1.7]	-	GO:0043169//cation binding;GO:0043169//cation binding	GO:0006812//cation transport;GO:0006812//cation transport	gi|567871023|ref|XP_006428133.1|/2.45129e-73/hypothetical protein CICLE_v10026695mg [Citrus clementina]
orange1.1t02269	orange1.1t02269.1,orange1.1t02269.2	137.31	121.27	145.1	4972.33	159.19	162.67	167.12	171.06	162.37	194.4	186.59	198.35	175.8	166.8	177.39	196.18	174.16	169.96	gene=orange1.1t02269 CDS=74-553	K17790|1|2e-66|253|cic:CICLE_v10012973mg|mitochondrial import inner membrane translocase subunit TIM22	GO:0016020//membrane;GO:0016020//membrane	-	-	gi|568879920|ref|XP_006492893.1|/3.88926e-66/PREDICTED: outer envelope pore protein 16-3, chloroplastic/mitochondrial-like isoform X1 [Citrus sinensis]
Cs7g26770	Cs7g26770.1,Cs7g26770.2	136.64	178.96	135.74	4972.33	169.46	130.9	217.4	132.37	187.21	244.08	234.2	139.39	136.59	120.94	148.18	239.26	138.37	223.56	gene=Cs7g26770 CDS=606-1091	-	-	-	-	gi|568864831|ref|XP_006485792.1|/5.24648e-71/PREDICTED: uncharacterized protein LOC102627691 [Citrus sinensis]
orange1.1t02270	orange1.1t02270.1	136.44	134.96	137.17	4972.33	153.48	135.23	159.9	144.86	142.74	173.75	165.55	164.95	129.34	121.55	117.09	132.85	134.85	126.73	gene=orange1.1t02270 CDS=1-1800	K06694|1|1e-14|82.4|sly:101250015|26S proteasome non-ATPase regulatory subunit 10;K12271|3|1e-14|82.4|egr:104418999|signal recognition particle 43 kDa protein	-	-	-	gi|568879926|ref|XP_006492896.1|/2.60007e-177/PREDICTED: ankyrin repeat domain-containing protein 2-like [Citrus sinensis]
Cs2g14230	Cs2g14230.1,Cs2g14230.2,Cs2g14230.3	136.31	88.64	118.23	4972.33	113.6	156.93	141.25	186.74	141.84	111.33	104.03	130.59	149.09	135.92	128.84	107.24	140.36	124.24	gene=Cs2g14230 CDS=118-702	K13250|1|2e-68|261|cic:CICLE_v10016821mg|translocon-associated protein subunit beta	GO:0043231//intracellular membrane-bounded organelle;GO:0031224//intrinsic component of membrane;GO:0043231//intracellular membrane-bounded organelle;GO:0031224//intrinsic component of membrane;GO:0043231//intracellular membrane-bounded organelle;GO:0031224//intrinsic component of membrane	-	-	gi|641828219|gb|KDO47378.1|/5.75498e-72/hypothetical protein CISIN_1g029361mg [Citrus sinensis]
orange1.1t02403	orange1.1t02403.1	136.08	140.41	137.42	4972.33	137.41	174.65	60.39	77.8	72.48	50.43	57.97	74.84	77.6	78.15	59.56	84.48	80.05	72.35	gene=orange1.1t02403 CDS=1-300	-	-	-	-	gi|567871605|ref|XP_006428392.1|/8.61486e-55/hypothetical protein CICLE_v10013190mg [Citrus clementina]
Cs7g23340	Cs7g23340.1	135.68	158.3	147.99	4972.33	152.26	138.67	284.29	172.69	251.15	227.39	205.3	228.73	127.03	105.89	112.65	177.75	90	140.28	gene=Cs7g23340 CDS=172-1098	K00365|1|5e-174|611|cic:CICLE_v10016037mg|urate oxidase [EC:1.7.3.3]	GO:0042579//microbody	GO:0016663	GO:0044403//symbiosis, encompassing mutualism through parasitism;GO:0009112	gi|567906929|ref|XP_006445778.1|/2.55004e-173/hypothetical protein CICLE_v10016037mg [Citrus clementina]
Cs6g04590	Cs6g04590.1	135.53	102.44	128.54	4972.33	139.65	176.71	92.97	111.04	98.81	112.22	85.4	104.92	126.85	111.03	107.7	112.16	124.51	142.66	gene=Cs6g04590 CDS=124-393	-	-	-	-	gi|567872477|ref|XP_006428828.1|/1.00903e-19/hypothetical protein CICLE_v10013218mg [Citrus clementina]
Cs3g25000	Cs3g25000.1	135.49	182.81	138.79	4972.33	202.75	145.95	803.09	213.94	542.42	883.73	402.69	270.71	140.62	175.07	210.22	381.83	228.26	321.2	gene=Cs3g25000 CDS=200-655	-	-	-	-	gi|568839083|ref|XP_006473524.1|/1.69459e-80/PREDICTED: uncharacterized protein LOC102616188 [Citrus sinensis]
Cs7g08630	Cs7g08630.1,Cs7g08630.2,Cs7g08630.3	135.45	147.01	149.73	4972.33	138.04	155.03	87.84	126.52	98.37	65.29	65.79	65.5	117.99	113.88	97.61	85.97	91.58	68.56	gene=Cs7g08630 CDS=140-553	K07466|1|4e-71|269|cic:CICLE_v10033038mg|replication factor A1	-	-	-	gi|567891739|ref|XP_006438390.1|/2.18038e-70/hypothetical protein CICLE_v10033038mg [Citrus clementina]
Cs8g15830	Cs8g15830.1	135.4	128.95	148.68	4972.33	152.39	200.21	83.14	81.51	51.45	28.71	30.92	24.44	215.83	222.68	193.93	152.64	219.17	116.71	gene=Cs8g15830 CDS=67-561	K02977|1|2e-74|279|cit:102610115|small subunit ribosomal protein S27Ae;K08770|2|2e-71|268|egr:104456611|ubiquitin C	GO:0030529//intracellular ribonucleoprotein complex	GO:0005198//structural molecule activity	GO:0010467//gene expression	gi|568869646|ref|XP_006488031.1|/8.77867e-74/PREDICTED: ubiquitin-40S ribosomal protein S27a-like [Citrus sinensis]
Cs2g29030	Cs2g29030.1	135.34	120.8	113.34	4972.33	117.18	119.58	68.51	79.87	78.29	57.46	55.26	57.71	96.63	104.76	89.32	70.05	79.07	66.69	gene=Cs2g29030 CDS=1-450	K02183|1|1e-80|298|egu:105035282|calmodulin	-	GO:0046872//metal ion binding	GO:0019932//second-messenger-mediated signaling;GO:0009640//photomorphogenesis;GO:0009593//detection of chemical stimulus	gi|698465314|ref|XP_009782645.1|/5.94366e-80/PREDICTED: calmodulin-7-like isoform X2 [Nicotiana sylvestris]
Cs7g23280	Cs7g23280.1	135.29	163.73	158.7	4972.33	170.92	139.55	31.08	50.36	47.93	40.69	53.47	35.93	61.08	55.63	57.52	88.35	77.57	111.6	gene=Cs7g23280 CDS=77-1090	K05278|1|0.0|700|cic:CICLE_v10015856mg|flavonol synthase [EC:1.14.11.23]	GO:0044424	GO:0043169//cation binding;GO:0019842//vitamin binding;GO:0016706//oxidoreductase activity, acting on paired donors, with incorporation or reduction of molecular oxygen, 2-oxoglutarate as one donor, and incorporation of one atom each of oxygen into both donors;GO:0016701//oxidoreductase activity, acting on single donors with incorporation of molecular oxygen	GO:0051553	gi|567906923|ref|XP_006445775.1|/0/hypothetical protein CICLE_v10015856mg [Citrus clementina]
Cs2g29090	Cs2g29090.1	134.9	68.45	83.79	4972.33	87.57	109.04	35.12	50.65	44.2	24.16	46.71	60.54	66.96	57.11	43.86	43.87	54.55	43.19	gene=Cs2g29090 CDS=451-2193	K00423|1|0.0|1171|cit:102622926|L-ascorbate oxidase [EC:1.10.3.3]	-	-	-	gi|568832431|ref|XP_006470436.1|/0/PREDICTED: L-ascorbate oxidase-like [Citrus sinensis]
Cs1g10270	Cs1g10270.1,Cs1g10270.2,Cs1g10270.3	134.88	109.55	124.66	4972.33	128.37	124.29	157.35	138.09	124.43	134.52	108.66	123.46	96.59	96.72	107.72	98.02	102.6	102.63	gene=Cs1g10270 CDS=274-2145	K02145|1|0.0|1034|cic:CICLE_v10030969mg|V-type H+-transporting ATPase subunit A [EC:3.6.3.14]	GO:0033176//proton-transporting V-type ATPase complex;GO:0033176//proton-transporting V-type ATPase complex;GO:0033176//proton-transporting V-type ATPase complex	GO:0015078//hydrogen ion transmembrane transporter activity;GO:0019829//cation-transporting ATPase activity;GO:0032559;GO:0015078//hydrogen ion transmembrane transporter activity;GO:0019829//cation-transporting ATPase activity;GO:0032559;GO:0015078//hydrogen ion transmembrane transporter activity;GO:0019829//cation-transporting ATPase activity;GO:0032559	GO:0015986//ATP synthesis coupled proton transport;GO:0015988//energy coupled proton transmembrane transport, against electrochemical gradient;GO:0015986//ATP synthesis coupled proton transport;GO:0015988//energy coupled proton transmembrane transport, against electrochemical gradient;GO:0015986//ATP synthesis coupled proton transport;GO:0015988//energy coupled proton transmembrane transport, aga…	gi|12585490|sp|Q9SM09.1|VATA_CITUN/0/RecName: Full=V-type proton ATPase catalytic subunit A; Short=V-ATPase subunit A; AltName: Full=V-ATPase 69 kDa subunit; AltName: Full=Vacuolar proton pump subunit alpha [Citrus unshiu]
Cs8g03030	Cs8g03030.1,Cs8g03030.2,Cs8g03030.3,Cs8g03030.4,Cs8g03030.5,Cs8g03030.6	134.46	142.92	128.96	4972.33	139.3	129.44	72.32	123.26	91.81	64.57	92.06	84.64	95.88	91.69	116.5	75.33	98.29	76.59	gene=Cs8g03030 CDS=177-1595	K11721|1|1e-118|428|cmo:103494849|bromodomain-containing protein 3	-	-	-	gi|568866895|ref|XP_006486782.1|/0/PREDICTED: transcription factor GTE7-like [Citrus sinensis]
Cs5g31010	Cs5g31010.1	134.44	129.67	149.58	4972.33	70.65	210.9	5.87	78.33	64.27	9.41	28.83	82.49	87.67	65.78	68.66	47.37	46.34	48.43	gene=Cs5g31010 CDS=92-664	-	-	-	-	gi|567903096|ref|XP_006444036.1|/2.19548e-80/hypothetical protein CICLE_v10022412mg [Citrus clementina]
Cs7g15610	Cs7g15610.1	134.3	125.01	125.18	4972.33	128.06	144.98	101.21	135.04	119.78	198.36	230.61	249.55	32.89	36.78	31.44	35.3	34.54	29.15	gene=Cs7g15610 CDS=1-1563	K01114|1|0.0|1036|cit:102613480|phospholipase C [EC:3.1.4.3]	GO:0043231//intracellular membrane-bounded organelle	GO:0004629//phospholipase C activity	GO:0006793//phosphorus metabolic process;GO:0009267//cellular response to starvation	gi|568862499|ref|XP_006484720.1|/0/PREDICTED: non-specific phospholipase C3-like [Citrus sinensis]
Cs4g13050	Cs4g13050.1,Cs4g13050.2	134.01	99.88	121.75	4972.33	128.28	131.14	92.35	119.17	96.23	82.99	77.41	86.64	101.69	102.2	91.17	90.36	106.33	90.52	gene=Cs4g13050 CDS=285-1634	K01412|1|0.0|834|cit:102631152|mitochondrial-processing peptidase subunit alpha [EC:3.4.24.64]	-	GO:0046914//transition metal ion binding;GO:0004175//endopeptidase activity;GO:0046872//metal ion binding;GO:0016787//hydrolase activity	GO:0019538//protein metabolic process	gi|568842879|ref|XP_006475356.1|/0/PREDICTED: mitochondrial-processing peptidase subunit alpha-like [Citrus sinensis]
Cs5g09100	Cs5g09100.1,Cs5g09100.2	133.86	140.06	125.3	4972.33	144.82	164.77	39.83	49.09	39.46	32.63	27.56	38.11	63.93	59.37	57.89	67.45	66.9	58.65	gene=Cs5g09100 CDS=238-576	-	-	-	-	gi|567895732|ref|XP_006440354.1|/1.02955e-43/hypothetical protein CICLE_v10022867mg [Citrus clementina]
Cs5g05650	Cs5g05650.1,Cs5g05650.2,Cs5g05650.3,Cs5g05650.4,Cs5g05650.5,Cs5g05650.6,Cs5g05650.7	133.47	68.5	170.23	4972.33	95.61	90.32	434.32	210.78	440.1	268.21	176.6	208.79	125.84	130.96	123.21	84.53	79.54	68.78	gene=Cs5g05650 CDS=142-1239	K00766|1|2e-160|565|cic:CICLE_v10020016mg|anthranilate phosphoribosyltransferase [EC:2.4.2.18]	-	GO:0016763//transferase activity, transferring pentosyl groups;GO:0016763//transferase activity, transferring pentosyl groups;GO:0016763//transferase activity, transferring pentosyl groups;GO:0016763//transferase activity, transferring pentosyl groups;GO:0016763//transferase activity, transferring pentosyl groups;GO:0016763//transferase activity, transferring pentosyl groups;GO:0016763//transfera…	GO:0006568//tryptophan metabolic process;GO:0006568//tryptophan metabolic process;GO:0006568//tryptophan metabolic process;GO:0006568//tryptophan metabolic process;GO:0006568//tryptophan metabolic process;GO:0006568//tryptophan metabolic process;GO:0006568//tryptophan metabolic process	gi|567894722|ref|XP_006439849.1|/0/hypothetical protein CICLE_v10020016mg [Citrus clementina]
Cs4g10860	Cs4g10860.1	133.21	151.26	133.83	4972.33	137.92	117.01	125.46	135.03	119.27	105.5	174.09	126.13	40.18	42.01	48.36	61.46	70.56	74.78	gene=Cs4g10860 CDS=504-3731	K13459|1|0.0|1037|cit:102612053|disease resistance protein RPS2	-	-	-	gi|568842475|ref|XP_006475172.1|/0/PREDICTED: disease resistance protein At4g27190-like isoform X2 [Citrus sinensis]
Cs9g16670	Cs9g16670.1	133.19	161.57	107.04	4972.33	148.89	121.88	69.27	90.09	74.74	109.71	130.17	116.87	64.46	55.7	62.97	58.88	61.85	65.34	gene=Cs9g16670 CDS=1-624	K00008|1|4e-106|384|cit:102607014|L-iditol 2-dehydrogenase [EC:1.1.1.14]	-	GO:0003824//catalytic activity;GO:0046914//transition metal ion binding	GO:0008152//metabolic process	gi|568874727|ref|XP_006490465.1|/2.17161e-105/PREDICTED: sorbitol dehydrogenase-like [Citrus sinensis]
Cs8g15790	Cs8g15790.1	133.06	161.34	127.24	4972.33	117.26	129.08	193.93	217.46	175.08	161.05	176.91	176.47	133.13	133.8	126.67	115.51	130.77	103.87	gene=Cs8g15790 CDS=1-735	K01759|1|8e-115|414|cit:102608847|lactoylglutathione lyase [EC:4.4.1.5]	-	GO:0016846//carbon-sulfur lyase activity;GO:0043169//cation binding	-	gi|568869637|ref|XP_006488027.1|/4.42293e-114/PREDICTED: lactoylglutathione lyase-like isoform X1 [Citrus sinensis]
Cs6g06050	Cs6g06050.1	133.01	113.08	114.92	4972.33	124.11	132.04	87.4	97.35	93.68	72.8	98	111.77	96.38	100.38	101.56	100.53	112.19	109.92	gene=Cs6g06050 CDS=1-1395	K12492|1|0.0|781|cit:102606881|ADP-ribosylation factor GTPase-activating protein 1	-	-	-	gi|568854333|ref|XP_006480784.1|/0/PREDICTED: probable ADP-ribosylation factor GTPase-activating protein AGD6-like isoform X1 [Citrus sinensis]
Cs1g06830	Cs1g06830.1,Cs1g06830.2	132.98	177.21	151.13	4972.33	148.65	171.16	71.75	100.89	94.22	71.45	70.49	104.55	105.68	109.66	136.16	125.51	174.09	156.44	gene=Cs1g06830 CDS=10-498	-	-	-	-	gi|567919848|ref|XP_006451930.1|/1.12154e-94/hypothetical protein CICLE_v10009639mg [Citrus clementina]
Cs5g19640	Cs5g19640.1,Cs5g19640.2	132.86	83.9	134.27	4972.33	136.75	163.18	59.91	112.3	100.32	69.26	74.43	110.92	77.71	65.87	59.66	66.11	70.36	75.72	gene=Cs5g19640 CDS=243-581	K08738|1|1e-43|177|cic:CICLE_v10022949mg|cytochrome c	GO:0043231//intracellular membrane-bounded organelle;GO:0044425;GO:0043231//intracellular membrane-bounded organelle;GO:0044425	GO:0005506//iron ion binding;GO:0005506//iron ion binding	GO:0051234//establishment of localization;GO:0006091//generation of precursor metabolites and energy;GO:0051234//establishment of localization;GO:0006091//generation of precursor metabolites and energy	gi|567898326|ref|XP_006441651.1|/1.05515e-60/hypothetical protein CICLE_v10022949mg [Citrus clementina]
Cs6g16290	Cs6g16290.1	132.85	108.35	122.61	4972.33	137.79	162.64	122.63	111.13	110.81	99.19	106.8	102.4	132.73	120.5	128.95	110.04	135.54	106.75	gene=Cs6g16290 CDS=201-815	K03626|1|1e-68|261|cit:102614945|nascent polypeptide-associated complex subunit alpha	-	-	-	gi|568856861|ref|XP_006481991.1|/5.80745e-68/PREDICTED: nascent polypeptide-associated complex subunit alpha-like protein 1-like [Citrus sinensis]
Cs1g22590	Cs1g22590.1	132.63	178.83	112.88	4972.33	136.23	93.44	170.49	217.64	260.84	289.61	317.99	293.12	462.77	476.51	523.22	416.66	574.23	493.22	gene=Cs1g22590 CDS=84-509	K13066|1|1e-73|276|cit:102629858|caffeic acid 3-O-methyltransferase [EC:2.1.1.68]	-	GO:0005515//protein binding;GO:0008171//O-methyltransferase activity	GO:0006730//one-carbon metabolic process;GO:0009699//phenylpropanoid biosynthetic process	gi|568848596|ref|XP_006478090.1|/5.79178e-73/PREDICTED: caffeic acid 3-O-methyltransferase-like [Citrus sinensis]
Cs4g18710	Cs4g18710.1	132.55	122.41	128.56	4972.33	129.59	113.34	107.29	118.11	104	160.44	121.85	93.97	107.82	121.83	104.02	100.2	106.55	107.26	gene=Cs4g18710 CDS=74-2083	K13210|1|0.0|1177|cit:102609390|far upstream element-binding protein	-	-	-	gi|568844142|ref|XP_006475954.1|/0/PREDICTED: far upstream element-binding protein 1-like isoform X1 [Citrus sinensis]
Cs4g08570	Cs4g08570.1	132.49	146.92	143.92	4972.33	150.69	144.53	112.43	115.06	142.94	150.48	151.58	109.8	194.82	192.64	210.84	206.34	175.22	181.43	gene=Cs4g08570 CDS=1-393	K13456|1|1e-11|68.6|pvu:PHAVU_010G021200g|RPM1-interacting protein 4	-	-	-	gi|568841856|ref|XP_006474872.1|/4.63019e-36/PREDICTED: uncharacterized protein LOC102627443 [Citrus sinensis]
Cs1g16820	Cs1g16820.1,Cs1g16820.2,Cs1g16820.3,Cs1g16820.4	132.23	169.38	154.17	4972.33	147.83	119.99	115.66	84.11	95.28	146.67	149.01	138.94	28.95	22.92	30.75	78.5	66.45	97.84	gene=Cs1g16820 CDS=398-1126	K09512|1|3e-62|240|pxb:103929282|DnaJ homolog subfamily B member 6	-	-	-	gi|568822836|ref|XP_006465832.1|/2.50294e-94/PREDICTED: dnaJ homolog subfamily B member 6-like isoform X1 [Citrus sinensis]
Cs2g06330	Cs2g06330.1	131.91	89.15	109.46	4972.33	107.73	121.1	79.89	140.74	106.8	58.6	68.34	95.18	150.05	139.06	137.67	96.55	126.86	97.3	gene=Cs2g06330 CDS=223-1194	-	-	-	-	gi|641857115|gb|KDO75881.1|/2.16484e-145/hypothetical protein CISIN_1g015863mg [Citrus sinensis]
Cs2g29070	Cs2g29070.1,Cs2g29070.2,Cs2g29070.3	131.89	141.76	139.97	4972.33	126.97	121.12	103.66	99.08	96.04	68.14	76.53	78.22	125.76	130.97	130.72	114.83	119.84	103.73	gene=Cs2g29070 CDS=270-2807	K11593|1|0.0|1556|cit:102622330|eukaryotic translation initiation factor 2C	-	GO:0008135//translation factor activity, RNA binding;GO:0008135//translation factor activity, RNA binding;GO:0008135//translation factor activity, RNA binding	GO:0006412//translation;GO:0006412//translation;GO:0006412//translation	gi|568832427|ref|XP_006470434.1|/0/PREDICTED: protein argonaute 4-like [Citrus sinensis]
Cs7g30890	Cs7g30890.1	131.77	98.02	115.29	4972.33	123.26	100.75	145.54	121.94	105.28	73.67	82.26	85.67	107.67	132.24	128.39	118.47	130.27	123.5	gene=Cs7g30890 CDS=1-5130	K04646|1|0.0|3155|cic:CICLE_v10030488mg|clathrin heavy chain	GO:0005905//coated pit;GO:0012510//trans-Golgi network transport vesicle membrane	-	GO:0015031//protein transport	gi|567886484|ref|XP_006435764.1|/0/hypothetical protein CICLE_v10030488mg [Citrus clementina]
Cs9g03340	Cs9g03340.1,Cs9g03340.2,Cs9g03340.3,Cs9g03340.4,Cs9g03340.5,Cs9g03340.6	131.77	125.16	129.97	4972.33	169.09	130.77	929.22	419.66	557.92	676.13	537.03	399.2	278.6	322.32	397.67	303.52	246.09	311.6	gene=Cs9g03340 CDS=116-2044	K14404|1|3e-11|72.4|sly:101254355|cleavage and polyadenylation specificity factor subunit 4	-	-	-	gi|567906505|ref|XP_006445566.1|/0/hypothetical protein CICLE_v10014439mg [Citrus clementina]
Cs5g08620	Cs5g08620.1,Cs5g08620.2,Cs5g08620.3,Cs5g08620.4	131.47	81.4	121.37	4972.33	130.66	156.99	79.68	93	71.7	73.06	45.74	47.75	94.96	91.54	66.1	66.06	75.44	56.87	gene=Cs5g08620 CDS=2-538	K02877|1|3e-66|252|cic:CICLE_v10024403mg|large subunit ribosomal protein L15e	GO:0030529//intracellular ribonucleoprotein complex;GO:0030529//intracellular ribonucleoprotein complex;GO:0030529//intracellular ribonucleoprotein complex;GO:0030529//intracellular ribonucleoprotein complex	GO:0005198//structural molecule activity;GO:0005198//structural molecule activity;GO:0005198//structural molecule activity;GO:0005198//structural molecule activity	GO:0010467//gene expression;GO:0010467//gene expression;GO:0010467//gene expression;GO:0010467//gene expression	gi|567895580|ref|XP_006440278.1|/5.0519e-99/hypothetical protein CICLE_v10024403mg [Citrus clementina]
Cs2g09210	Cs2g09210.1	131.47	29.98	97.03	4972.33	60.48	143.87	1	29.33	29.97	0	3.86	19.03	0	0	0	0	0	0.44	gene=Cs2g09210 CDS=1-960	K00430|1|1e-164|579|cit:102627605|peroxidase [EC:1.11.1.7]	-	GO:0005506//iron ion binding;GO:0003824//catalytic activity;GO:0016209//antioxidant activity	GO:0008152//metabolic process;GO:0006950//response to stress	gi|568827622|ref|XP_006468150.1|/6.85727e-164/PREDICTED: peroxidase 52-like [Citrus sinensis]
Cs7g10710	Cs7g10710.1	131.47	162.47	151.04	4972.33	140.29	133.98	461.32	263.45	369.08	451.79	316.68	252.63	219.03	203.62	282.87	371.56	299.14	470.39	gene=Cs7g10710 CDS=238-930	K17616|1|3e-64|246|egr:104417750|CTD small phosphatase-like protein 2 [EC:3.1.3.-];K01228|3|2e-19|97.8|pmum:103322055|mannosyl-oligosaccharide glucosidase [EC:3.2.1.106]	-	-	-	gi|567891023|ref|XP_006438032.1|/3.5247e-103/hypothetical protein CICLE_v10032648mg [Citrus clementina]
Cs1g26430	Cs1g26430.1,Cs1g26430.2,Cs1g26430.3,Cs1g26430.4,Cs1g26430.5	131.4	125.2	131.7	4972.33	136.15	124.76	130.89	139.65	125.83	122.13	117.25	132.66	136.54	135.34	134.7	128.16	131.61	134.31	gene=Cs1g26430 CDS=520-2151	K04523|1|0.0|677|cic:CICLE_v10025307mg|ubiquilin	-	-	-	gi|568825406|ref|XP_006467070.1|/0/PREDICTED: ubiquitin domain-containing protein DSK2b-like isoform X1 [Citrus sinensis]
Cs7g18460	Cs7g18460.1	131.09	89	97.65	4972.33	97.34	113.63	5.67	24.34	16.02	3.95	8.26	17.66	60.05	51.83	38.28	40.11	46.04	29.96	gene=Cs7g18460 CDS=411-2024	K13680|1|0.0|999|cit:102616038|beta-mannan synthase [EC:2.4.1.32]	-	GO:0016759//cellulose synthase activity	-	gi|568863038|ref|XP_006484970.1|/0/PREDICTED: glucomannan 4-beta-mannosyltransferase 2-like [Citrus sinensis]
Cs3g25730	Cs3g25730.1	130.93	34.02	69.44	4972.33	60.63	122.72	3.13	26.08	33.17	7.4	6.76	27.07	15.53	10.56	11.72	14.19	7.24	12.1	gene=Cs3g25730 CDS=76-1683	-	-	GO:0016899//oxidoreductase activity, acting on the CH-OH group of donors, oxygen as acceptor	GO:0008152//metabolic process	gi|568839262|ref|XP_006473606.1|/0/PREDICTED: galactose oxidase-like [Citrus sinensis]
Cs6g09720	Cs6g09720.1,Cs6g09720.2,Cs6g09720.3	130.61	165.45	139.57	4972.33	132.82	130.1	96.1	110.42	113.77	104.23	124.64	108.18	135.8	120.36	141.49	134.7	118.53	147.62	gene=Cs6g09720 CDS=203-916	K12382|1|1e-82|308|cit:102619717|saposin	-	-	-	gi|567873915|ref|XP_006429547.1|/5.32063e-91/hypothetical protein CICLE_v10011064mg [Citrus clementina]
Cs1g01220	Cs1g01220.1,Cs1g01220.2	130.4	121.57	102.57	4972.33	136.32	120.63	61.8	89.12	84.5	38.64	61.71	68.95	80.46	104	103.8	55.7	85.28	51.2	gene=Cs1g01220 CDS=241-1845	-	-	-	-	gi|567871067|ref|XP_006428155.1|/0/hypothetical protein CICLE_v10025415mg [Citrus clementina]
orange1.1t02003	orange1.1t02003.1	130.29	149.77	130.82	4972.33	136.78	182.64	81.37	189.48	182.84	168.1	208.73	246.69	208.03	195.46	181.12	149.02	133.8	115.41	gene=orange1.1t02003 CDS=161-1084	K14299|1|5e-16|86.7|mdm:103418195|nucleoporin SEH1	GO:0005618//cell wall	-	-	gi|567862278|ref|XP_006423793.1|/0/hypothetical protein CICLE_v10028909mg [Citrus clementina]
Cs9g04620	Cs9g04620.1,Cs9g04620.2	130.28	144.02	120.58	4972.33	121.61	107.41	156.08	125.02	135.09	135.36	134.22	112.73	75.52	83.85	83.92	74.15	73.54	63.43	gene=Cs9g04620 CDS=182-1864	K03347|1|0.0|1163|cic:CICLE_v10004406mg|cullin 1	GO:0000151//ubiquitin ligase complex;GO:0000151//ubiquitin ligase complex	GO:0019899//enzyme binding;GO:0019899//enzyme binding	GO:0019941//modification-dependent protein catabolic process;GO:0019941//modification-dependent protein catabolic process	gi|567852899|ref|XP_006419613.1|/0/hypothetical protein CICLE_v10004406mg [Citrus clementina]
Cs5g08990	Cs5g08990.1,Cs5g08990.2,Cs5g08990.3	130.21	224.67	169.44	4972.33	168.2	175.34	81.77	93.3	83.24	81.97	83.65	72.93	66.69	61.63	83.65	84.11	69.22	74.75	gene=Cs5g08990 CDS=616-924	K08341|1|3e-36|153|cic:CICLE_v10022858mg|GABA(A) receptor-associated protein	-	GO:0004871//signal transducer activity;GO:0004871//signal transducer activity;GO:0004871//signal transducer activity	-	gi|567895694|ref|XP_006440335.1|/2.83342e-57/hypothetical protein CICLE_v10022858mg [Citrus clementina]
Cs7g32320	Cs7g32320.1	130.2	91.9	130.67	4972.33	142.7	177.22	123.48	98.9	79.67	104.68	73.53	76.1	130.52	118.72	107.41	94.33	116.37	109.21	gene=Cs7g32320 CDS=112-450	K02917|1|3e-61|235|cic:CICLE_v10033116mg|large subunit ribosomal protein L35Ae	GO:0030529//intracellular ribonucleoprotein complex	GO:0005198//structural molecule activity	GO:0010467//gene expression	gi|567886082|ref|XP_006435563.1|/1.80105e-60/hypothetical protein CICLE_v10033116mg [Citrus clementina]
Cs2g22160	Cs2g22160.1	130.08	77.68	111.45	4972.33	131.4	160.13	88.92	73.88	59.46	89.99	41.98	40.07	118.52	130.07	94.01	79.44	76.31	71.44	gene=Cs2g22160 CDS=212-994	K02938|1|2e-140|499|cic:CICLE_v10016308mg|large subunit ribosomal protein L8e	GO:0030529//intracellular ribonucleoprotein complex	GO:0005198//structural molecule activity	GO:0010467//gene expression	gi|567910271|ref|XP_006447449.1|/1.08854e-139/hypothetical protein CICLE_v10016308mg [Citrus clementina]
Cs5g04290	Cs5g04290.1,Cs5g04290.2	130.02	258.88	185.51	4972.33	222.09	158.46	137.37	217.83	165.26	79.38	99.57	58.07	241.86	223.45	336.59	117.84	166.08	97.19	gene=Cs5g04290 CDS=347-1216	K09338|1|5e-146|518|cit:102608037|homeobox-leucine zipper protein	-	GO:0003677//DNA binding;GO:0003677//DNA binding	GO:0006351//transcription, DNA-templated;GO:0006351//transcription, DNA-templated	gi|641857294|gb|KDO76039.1|/1.30166e-147/hypothetical protein CISIN_1g019954mg [Citrus sinensis]
orange1.1t02754	orange1.1t02754.1,orange1.1t02754.2	129.81	153.92	103.38	4972.33	109.58	115.42	37.51	114.33	65.64	31.39	49.18	48.49	151.33	159.68	155.83	91.98	123.6	73.69	gene=orange1.1t02754 CDS=67-903	K09753|1|2e-128|459|cit:102615114|cinnamoyl-CoA reductase [EC:1.2.1.44]	-	GO:0016620//oxidoreductase activity, acting on the aldehyde or oxo group of donors, NAD or NADP as acceptor;GO:0048037//cofactor binding;GO:0048037//cofactor binding;GO:0016491//oxidoreductase activity	GO:0008152//metabolic process;GO:0008152//metabolic process	gi|568880935|ref|XP_006493351.1|/9.05351e-128/PREDICTED: cinnamoyl-CoA reductase 1-like [Citrus sinensis]
Cs1g21830	Cs1g21830.1,Cs1g21830.2	129.78	238.37	140.31	4972.33	123.86	94.03	34.51	67.85	42.99	20.51	39.74	28.43	48.34	42.91	44.17	27.3	55.9	31.12	gene=Cs1g21830 CDS=394-1113	K01227|1|3e-06|54.3|obr:102704525|mannosyl-glycoprotein endo-beta-N-acetylglucosaminidase [EC:3.2.1.96]	-	-	-	gi|567866883|ref|XP_006426064.1|/6.87741e-106/hypothetical protein CICLE_v10026374mg [Citrus clementina]
Cs2g02540	Cs2g02540.1,Cs2g02540.2,Cs2g02540.3	129.73	76.1	107.86	4972.33	116.59	140.13	35.27	61.23	43.66	17.95	25.04	34.82	76.57	72.14	60.2	54.64	81.74	48.99	gene=Cs2g02540 CDS=458-2023	K00895|1|0.0|988|cit:102578047|pyrophosphate--fructose-6-phosphate 1-phosphotransferase [EC:2.7.1.90]	GO:0043234//protein complex;GO:0043234//protein complex;GO:0043234//protein complex	GO:0008443//phosphofructokinase activity;GO:0032559;GO:0008443//phosphofructokinase activity;GO:0032559;GO:0008443//phosphofructokinase activity;GO:0032559	GO:0006796//phosphate-containing compound metabolic process;GO:0006007//glucose catabolic process;GO:0006007//glucose catabolic process;GO:0006007//glucose catabolic process	gi|162955861|gb|ABY25306.1|/0/pyrophosphate-dependent phosphofructokinase beta subunit [Citrus sinensis x Citrus trifoliata]
Cs2g10350	Cs2g10350.1,Cs2g10350.2,Cs2g10350.3,Cs2g10350.4,Cs2g10350.5,Cs2g10350.6	129.62	127.44	130.44	4972.33	93.49	108.67	32.29	66.98	54.07	21.13	43.35	62.53	60.23	63.93	61.98	43.03	62.88	44.07	gene=Cs2g10350 CDS=642-1883	K12448|1|0.0|780|cit:102629137|UDP-arabinose 4-epimerase [EC:5.1.3.5]	GO:0043231//intracellular membrane-bounded organelle;GO:0043231//intracellular membrane-bounded organelle;GO:0043231//intracellular membrane-bounded organelle;GO:0043231//intracellular membrane-bounded organelle;GO:0043231//intracellular membrane-bounded organelle;GO:0043231//intracellular membrane-bounded organelle	GO:0016857//racemase and epimerase activity, acting on carbohydrates and derivatives;GO:0048037//cofactor binding;GO:0016857//racemase and epimerase activity, acting on carbohydrates and derivatives;GO:0048037//cofactor binding;GO:0016857//racemase and epimerase activity, acting on carbohydrates and derivatives;GO:0048037//cofactor binding;GO:0016857//racemase and epimerase activity, acting on ca…	GO:0006139//nucleobase-containing compound metabolic process;GO:0042546//cell wall biogenesis;GO:0019322//pentose biosynthetic process;GO:0019318//hexose metabolic process;GO:0006139//nucleobase-containing compound metabolic process;GO:0042546//cell wall biogenesis;GO:0019322//pentose biosynthetic process;GO:0019318//hexose metabolic process;GO:0006139//nucleobase-containing compound metabolic pr…	gi|568828090|ref|XP_006468378.1|/0/PREDICTED: UDP-arabinose 4-epimerase 1-like isoform X1 [Citrus sinensis]
Cs9g03820	Cs9g03820.1	129.52	118.71	130.96	4972.33	144.88	94.21	152.81	159.31	179.62	131.79	146.13	148.01	221.36	209.63	162.8	96.41	78.16	81.35	gene=Cs9g03820 CDS=227-988	K09286|1|6e-131|468|cit:102627706|EREBP-like factor	-	-	-	gi|568871721|ref|XP_006489030.1|/3.50985e-130/PREDICTED: ethylene-responsive transcription factor RAP2-3-like [Citrus sinensis]
Cs2g02980	Cs2g02980.1,Cs2g02980.2,Cs2g02980.3,Cs2g02980.4,Cs2g02980.5,Cs2g02980.6	129.48	121.97	137.65	4972.33	117.33	93.7	132.38	168.43	108.71	16.66	97.07	92.88	178.15	204.42	186.29	31.06	38.47	25.16	gene=Cs2g02980 CDS=502-1587	K05907|1|0.0|724|cit:102626350|adenylyl-sulfate reductase (glutathione) [EC:1.8.4.9]	-	GO:0016667//oxidoreductase activity, acting on a sulfur group of donors;GO:0016667//oxidoreductase activity, acting on a sulfur group of donors;GO:0016667//oxidoreductase activity, acting on a sulfur group of donors;GO:0016667//oxidoreductase activity, acting on a sulfur group of donors;GO:0016667//oxidoreductase activity, acting on a sulfur group of donors;GO:0016667//oxidoreductase activity, ac…	GO:0006790//sulfur compound metabolic process;GO:0019725//cellular homeostasis;GO:0006790//sulfur compound metabolic process;GO:0019725//cellular homeostasis;GO:0006790//sulfur compound metabolic process;GO:0019725//cellular homeostasis;GO:0006790//sulfur compound metabolic process;GO:0019725//cellular homeostasis;GO:0006790//sulfur compound metabolic process;GO:0019725//cellular homeostasis;GO:0…	gi|641859578|gb|KDO78268.1|/0/hypothetical protein CISIN_1g012424mg [Citrus sinensis]
Cs8g20430	Cs8g20430.1	129.4	102.49	124.43	4972.33	127.41	138.43	209.72	145	147.38	195.95	132.33	119.18	168.39	184.46	159.21	152.46	171.67	171.63	gene=Cs8g20430 CDS=300-986	K15306|1|1e-106|387|cit:102629132|Ran-binding protein 1	-	-	GO:0006810//transport	gi|568870730|ref|XP_006488552.1|/7.79832e-106/PREDICTED: ran-binding protein 1 homolog a-like [Citrus sinensis]
Cs3g16830	Cs3g16830.1	129.25	171.5	156.13	4972.33	170.42	142.26	156.97	109.11	172.75	322.43	168.4	190.7	138.15	145.47	163.63	268.61	139.79	264.53	gene=Cs3g16830 CDS=1-1416	K03255|1|1e-30|135|mdm:103413520|protein TIF31;K04422|2|4e-09|63.5|tcc:TCM_038016|mitogen-activated protein kinase kinase kinase 13 [EC:2.7.11.25];K17604|4|7e-06|52.8|jcu:105647375|zinc finger SWIM domain-containing protein 3	-	-	-	gi|568836754|ref|XP_006472399.1|/0/PREDICTED: uncharacterized protein LOC102628028 [Citrus sinensis]
Cs2g25030	Cs2g25030.1	129.03	182.83	119.73	4972.33	132.59	84.34	186.99	177.27	200.65	245.51	177.67	126.25	131.22	127.11	116.03	138.01	131.24	110.72	gene=Cs2g25030 CDS=1-702	-	-	-	-	gi|567909577|ref|XP_006447102.1|/4.71844e-133/hypothetical protein CICLE_v10016522mg [Citrus clementina]
Cs1g20600	Cs1g20600.1,Cs1g20600.2,Cs1g20600.3	129.02	193.1	131.54	4972.33	135.43	103.54	110.35	164.33	140.82	141.78	140.07	118.71	26.03	35.28	70.67	57.37	63.11	50.76	gene=Cs1g20600 CDS=32-1138	K00083|1|8e-156|550|cic:CICLE_v10025755mg|cinnamyl-alcohol dehydrogenase [EC:1.1.1.195]	-	GO:0003824//catalytic activity;GO:0046914//transition metal ion binding;GO:0003824//catalytic activity;GO:0046914//transition metal ion binding;GO:0005488	GO:0008152//metabolic process;GO:0008152//metabolic process	gi|567867227|ref|XP_006426236.1|/4.57512e-155/hypothetical protein CICLE_v10025755mg [Citrus clementina]
Cs1g18700	Cs1g18700.1,Cs1g18700.2	128.93	146.16	138.89	4972.33	115.5	139.52	103.9	167.6	137.05	86.62	136.61	128.03	177.05	158.25	173.65	154.8	146.09	146.44	gene=Cs1g18700 CDS=136-747	K12197|1|2e-92|340|cic:CICLE_v10026516mg|charged multivesicular body protein 1	-	-	GO:0016197//endosomal transport;GO:0009880//embryonic pattern specification;GO:0003006//developmental process involved in reproduction;GO:0016197//endosomal transport;GO:0009880//embryonic pattern specification;GO:0003006//developmental process involved in reproduction	gi|567867689|ref|XP_006426467.1|/8.70366e-92/hypothetical protein CICLE_v10026516mg [Citrus clementina]
Cs8g02670	Cs8g02670.1	128.72	156.92	159.54	4972.33	135.01	108.28	44.8	88.5	74.19	36.57	40.22	34.37	112.2	119.09	107.04	134.92	92.22	101.54	gene=Cs8g02670 CDS=1-597	K04392|1|1e-96|352|cic:CICLE_v10029311mg|Ras-related C3 botulinum toxin substrate 1	GO:0044424	GO:0032561//guanyl ribonucleotide binding;GO:0004620//phospholipase activity	GO:0035556//intracellular signal transduction	gi|567859900|ref|XP_006422604.1|/7.19006e-96/hypothetical protein CICLE_v10029311mg [Citrus clementina]
Cs6g07830	Cs6g07830.1	128.57	79.31	123.7	4972.33	121.38	115.87	12.81	37.3	25.41	5.55	14.2	9.99	77.05	61.12	39	25.13	22.83	10.67	gene=Cs6g07830 CDS=254-1672	K13065|1|8e-33|142|crb:CARUB_v10011977mg|shikimate O-hydroxycinnamoyltransferase [EC:2.3.1.133]	-	GO:0016747//transferase activity, transferring acyl groups other than amino-acyl groups	-	gi|568854729|ref|XP_006480972.1|/0/PREDICTED: uncharacterized acetyltransferase At3g50280-like [Citrus sinensis]
Cs9g17330	Cs9g17330.1	128.49	93.68	100.4	4972.33	121.06	138.69	38.69	42.99	42.64	16.6	15.9	25.5	83.63	91.74	89	59.41	101.7	64.09	gene=Cs9g17330 CDS=175-1515	K07375|1|0.0|872|cic:CICLE_v10004755mg|tubulin beta	GO:0043234//protein complex;GO:0015630//microtubule cytoskeleton	GO:0017111//nucleoside-triphosphatase activity;GO:0032561//guanyl ribonucleotide binding	GO:0043623//cellular protein complex assembly;GO:0009207;GO:0006970//response to osmotic stress;GO:0007017//microtubule-based process	gi|567858482|ref|XP_006421924.1|/0/hypothetical protein CICLE_v10004755mg [Citrus clementina]
Cs6g16050	Cs6g16050.1	128.13	106.31	107.4	4972.33	129.25	158.05	41.28	75.63	72.82	55.8	63.58	87.83	62.49	63.52	67.18	76.69	75.58	76.07	gene=Cs6g16050 CDS=24-485	K02503|1|1e-72|273|cit:102607459|histidine triad (HIT) family protein	-	-	-	gi|568856806|ref|XP_006481968.1|/7.05093e-72/PREDICTED: 14 kDa zinc-binding protein-like [Citrus sinensis]
Cs9g14360	Cs9g14360.1	128.12	76.44	91.5	4972.33	80.98	115.85	6.77	20.35	33.08	11.42	19.22	38.84	16.85	12.95	9.14	5.41	6.65	8.78	gene=Cs9g14360 CDS=160-750	K01051|1|1e-23|112|ath:AT1G53830|pectinesterase [EC:3.1.1.11]	-	GO:0030234//enzyme regulator activity	-	gi|568873961|ref|XP_006490093.1|/8.23343e-103/PREDICTED: 21 kDa protein-like [Citrus sinensis]
Cs8g16680	Cs8g16680.1,Cs8g16680.2,Cs8g16680.3,Cs8g16680.4	127.93	97.3	118.43	4972.33	123.31	122.78	148.13	141.99	143.94	120.16	116.28	118.63	154.86	158.83	152.59	139.64	142.04	138.43	gene=Cs8g16680 CDS=111-1640	K09580|1|0.0|842|cit:102629426|protein disulfide-isomerase A1 [EC:5.3.4.1]	GO:0043231//intracellular membrane-bounded organelle;GO:0043231//intracellular membrane-bounded organelle;GO:0043231//intracellular membrane-bounded organelle;GO:0043231//intracellular membrane-bounded organelle	GO:0015036//disulfide oxidoreductase activity;GO:0004576//oligosaccharyl transferase activity;GO:0015036//disulfide oxidoreductase activity;GO:0004576//oligosaccharyl transferase activity;GO:0015036//disulfide oxidoreductase activity;GO:0004576//oligosaccharyl transferase activity;GO:0015036//disulfide oxidoreductase activity;GO:0004576//oligosaccharyl transferase activity	GO:0018904;GO:0019725//cellular homeostasis;GO:0018904;GO:0019725//cellular homeostasis;GO:0018904;GO:0019725//cellular homeostasis;GO:0018904;GO:0019725//cellular homeostasis	gi|641854462|gb|KDO73270.1|/0/hypothetical protein CISIN_1g007850mg [Citrus sinensis]
Cs9g05290	Cs9g05290.1	127.85	121.93	130.8	4972.33	103.3	121.43	43.19	68.7	60.97	40.73	48.06	48.31	86.41	81.96	71.19	51.32	54.31	46.58	gene=Cs9g05290 CDS=1-627	K00472|1|1e-118|425|cic:CICLE_v10005535mg|prolyl 4-hydroxylase [EC:1.14.11.2]	-	GO:0046914//transition metal ion binding;GO:0019798//procollagen-proline dioxygenase activity;GO:0019842//vitamin binding	GO:0008152//metabolic process	gi|567853147|ref|XP_006419737.1|/7.5741e-118/hypothetical protein CICLE_v10005535mg [Citrus clementina]
Cs4g17360	Cs4g17360.1,Cs4g17360.2,Cs4g17360.3	127.83	99.05	136.48	4972.33	142.45	137.54	117.19	105.39	97.19	139.67	72.54	87.14	248.16	234.01	256.45	237.88	238.55	232.89	gene=Cs4g17360 CDS=106-627	K07936|1|4e-115|415|cic:CICLE_v10009426mg|GTP-binding nuclear protein Ran	GO:0043231//intracellular membrane-bounded organelle	GO:0017111//nucleoside-triphosphatase activity;GO:0032561//guanyl ribonucleotide binding;GO:0017111//nucleoside-triphosphatase activity;GO:0032561//guanyl ribonucleotide binding;GO:0017111//nucleoside-triphosphatase activity;GO:0032561//guanyl ribonucleotide binding	GO:0023052//signaling;GO:0006605//protein targeting;GO:0009207;GO:0051169//nuclear transport;GO:0023052//signaling;GO:0009207;GO:0051169//nuclear transport;GO:0015031//protein transport;GO:0023052//signaling;GO:0009207;GO:0051169//nuclear transport;GO:0015031//protein transport	gi|567917996|ref|XP_006451004.1|/3.92567e-119/hypothetical protein CICLE_v10009426mg [Citrus clementina]
Cs3g15910	Cs3g15910.1	127.62	131.53	130.88	4972.33	129.76	136.58	217	191.71	212.92	251.05	238.44	204.7	134.67	128.85	139.86	138.95	109.12	138.87	gene=Cs3g15910 CDS=18-842	K00759|1|4e-143|508|cit:102621941|adenine phosphoribosyltransferase [EC:2.4.2.7]	GO:0044424	GO:0016763//transferase activity, transferring pentosyl groups	GO:0043096	gi|568836518|ref|XP_006472289.1|/2.25057e-142/PREDICTED: adenine phosphoribosyltransferase 1, chloroplastic-like [Citrus sinensis]
Cs5g15190	Cs5g15190.1	127.62	186.9	136.99	4972.33	181.19	156.98	169.01	171.32	127.8	116	149.1	148.97	88.15	76.52	103.11	99.78	146.33	147.57	gene=Cs5g15190 CDS=301-960	K00799|1|4e-120|432|cit:102631055|glutathione S-transferase [EC:2.5.1.18]	-	GO:0016846//carbon-sulfur lyase activity;GO:0016765//transferase activity, transferring alkyl or aryl (other than methyl) groups	GO:0009755//hormone-mediated signaling pathway	gi|568848433|ref|XP_006478015.1|/2.20474e-119/PREDICTED: probable glutathione S-transferase-like [Citrus sinensis]
Cs8g07590	Cs8g07590.1	127.36	116.05	137.68	4972.33	138.22	131.6	60.02	70.92	57.29	50.8	42.68	50.92	51.78	45.37	47.32	38.83	51.89	36.24	gene=Cs8g07590 CDS=233-1162	K00011|1|1e-170|600|cit:102619628|aldehyde reductase [EC:1.1.1.21]	-	GO:0016616//oxidoreductase activity, acting on the CH-OH group of donors, NAD or NADP as acceptor	GO:0008152//metabolic process;GO:0010038//response to metal ion	gi|568867896|ref|XP_006487264.1|/6.53698e-170/PREDICTED: NADP-dependent D-sorbitol-6-phosphate dehydrogenase-like [Citrus sinensis]
Cs7g07140	Cs7g07140.1,Cs7g07140.2,Cs7g07140.3	127.27	105.76	121.86	4972.33	99.87	105.14	163.21	189.11	195.82	198.53	264.39	254.85	81.67	85.69	90.83	167.34	86.38	137.34	gene=Cs7g07140 CDS=349-1200	K13425|1|1e-20|68.6|cmo:103483243|WRKY transcription factor 22	-	-	-	gi|568860064|ref|XP_006483548.1|/3.61792e-161/PREDICTED: probable WRKY transcription factor 17-like [Citrus sinensis]
Cs2g03000	Cs2g03000.1,Cs2g03000.2	127.13	151.43	131.54	4972.33	141.21	102.67	37.84	70.42	66.61	86.74	86.69	88.21	42.08	33.94	47.9	33.51	44.47	39.04	gene=Cs2g03000 CDS=59-934	K01759|1|2e-167|588|cit:102626939|lactoylglutathione lyase [EC:4.4.1.5]	-	GO:0016846//carbon-sulfur lyase activity;GO:0043169//cation binding;GO:0016846//carbon-sulfur lyase activity;GO:0043169//cation binding	-	gi|568826118|ref|XP_006467421.1|/1.12549e-166/PREDICTED: putative lactoylglutathione lyase-like [Citrus sinensis]
orange1.1t02087	orange1.1t02087.1	127.11	45.66	113.65	4972.33	107.23	206.79	6.94	7.5	1.88	0.85	0.43	7.98	0.6	0.74	0.45	0.61	0.91	0.3	gene=orange1.1t02087 CDS=1-1140	K11818|1|5e-83|308|ath:AT4G31500|cytochrome P450, family 83, subfamily B, polypeptide 1 [EC:1.14.-.-]	-	-	-	gi|568879614|ref|XP_006492748.1|/0/PREDICTED: cytochrome P450 83B1-like [Citrus sinensis]
Cs9g01410	Cs9g01410.1	127.1	117.45	150.54	4972.33	118.8	161.11	5	24.13	12.38	1.61	17.7	22.91	40.45	43.59	54.34	18.34	48.63	30.48	gene=Cs9g01410 CDS=235-1398	K00789|1|0.0|767|cit:102618655|S-adenosylmethionine synthetase [EC:2.5.1.6]	GO:0044424	GO:0046872//metal ion binding;GO:0016765//transferase activity, transferring alkyl or aryl (other than methyl) groups;GO:0032559	GO:0044237//cellular metabolic process	gi|568871139|ref|XP_006488750.1|/0/PREDICTED: LOW QUALITY PROTEIN: S-adenosylmethionine synthase-like [Citrus sinensis]
Cs7g04320	Cs7g04320.1	126.47	114.48	126.32	4972.33	119.66	139.26	73.4	132.22	105.16	55.19	72.07	90.58	105.84	92.59	96.56	71.65	87.71	62.92	gene=Cs7g04320 CDS=164-994	K15040|1|7e-140|498|cit:102611592|voltage-dependent anion channel protein 2	GO:0016021//integral component of membrane;GO:0031966//mitochondrial membrane	GO:0005244//voltage-gated ion channel activity;GO:0022829//wide pore channel activity	GO:0043269//regulation of ion transport	gi|568859403|ref|XP_006483230.1|/3.70675e-139/PREDICTED: mitochondrial outer membrane protein porin of 36 kDa-like [Citrus sinensis]
Cs2g14600	Cs2g14600.1	126.39	105.94	108.53	4972.33	124	134.82	41.67	80.57	62.07	29.71	40.07	43.82	87.46	76.76	76.57	65.56	84.12	64.14	gene=Cs2g14600 CDS=360-1187	K00411|1|4e-132|472|cit:102624833|ubiquinol-cytochrome c reductase iron-sulfur subunit [EC:1.10.2.2]	GO:0043231//intracellular membrane-bounded organelle;GO:0044425	GO:0043169//cation binding;GO:0016491//oxidoreductase activity;GO:0051536//iron-sulfur cluster binding;GO:0015078//hydrogen ion transmembrane transporter activity	GO:0051234//establishment of localization;GO:0006091//generation of precursor metabolites and energy	gi|568829162|ref|XP_006468899.1|/2.54974e-131/PREDICTED: cytochrome b-c1 complex subunit Rieske-2, mitochondrial-like [Citrus sinensis]
orange1.1t01103	orange1.1t01103.1	126.05	158.71	146.42	4972.33	137.35	155.46	107.77	135.97	133.54	144.06	122.1	120.56	64.02	53.06	67.43	100.28	90.75	119.29	gene=orange1.1t01103 CDS=238-609	-	-	-	-	gi|568877600|ref|XP_006491816.1|/2.55831e-59/PREDICTED: uncharacterized protein LOC102631435 [Citrus sinensis]
Cs2g17230	Cs2g17230.1	125.91	160.26	137.76	4972.33	126.74	98.93	345.81	275.15	275.07	448.58	380.62	246.3	104.59	103.49	96.79	122.12	103.23	102.5	gene=Cs2g17230 CDS=323-1444	K13464|1|0.0|684|cic:CICLE_v10015656mg|jasmonate ZIM domain-containing protein	-	-	-	gi|567911749|ref|XP_006448188.1|/0/hypothetical protein CICLE_v10015656mg [Citrus clementina]
Cs4g09370	Cs4g09370.1,Cs4g09370.2,Cs4g09370.3,Cs4g09370.4	125.79	161.59	136.26	4972.33	152.19	120.22	110.41	115.57	99.77	143.18	118.66	96.61	98.57	82.04	74.73	89.31	96.55	109.45	gene=Cs4g09370 CDS=153-1442	-	-	-	-	gi|567920994|ref|XP_006452503.1|/0/hypothetical protein CICLE_v10008378mg [Citrus clementina]
Cs4g07710	Cs4g07710.1,Cs4g07710.2,Cs4g07710.3,Cs4g07710.4	125.73	142.33	131.9	4972.33	131.08	112.44	182.13	258.06	212.1	197.87	188.01	209.22	205.04	185.4	188.85	183.56	206.75	170.27	gene=Cs4g07710 CDS=643-1002	K06689|1|5e-71|269|cit:102625059|ubiquitin-conjugating enzyme E2 D/E [EC:2.3.2.23]	-	GO:0019787//ubiquitin-like protein transferase activity;GO:0032559;GO:0019787//ubiquitin-like protein transferase activity;GO:0032559;GO:0019787//ubiquitin-like protein transferase activity;GO:0032559;GO:0019787//ubiquitin-like protein transferase activity;GO:0032559	GO:0032446//protein modification by small protein conjugation;GO:0032446//protein modification by small protein conjugation;GO:0032446//protein modification by small protein conjugation;GO:0032446//protein modification by small protein conjugation	gi|567921506|ref|XP_006452759.1|/2.63527e-70/hypothetical protein CICLE_v10009806mg [Citrus clementina]
Cs6g07200	Cs6g07200.1,Cs6g07200.2,Cs6g07200.3,Cs6g07200.4,Cs6g07200.5,Cs6g07200.6,Cs6g07200.7	125.7	229.42	151.96	4972.33	150.21	93.8	500.35	166.17	375.34	720.85	359.32	248.95	127.42	117.8	146.27	176.71	62.18	89.08	gene=Cs6g07200 CDS=46-525	K06700|1|2e-38|160|tcc:TCM_021825|proteasome inhibitor subunit 1 (PI31)	-	-	-	gi|641839036|gb|KDO57971.1|/1.57546e-76/hypothetical protein CISIN_1g031376mg [Citrus sinensis]
Cs8g17820	Cs8g17820.1	125.68	75.16	118.47	4972.33	125.3	180.79	37.16	48.07	32.23	33.93	23.34	21.92	77.04	65.97	61.21	46.65	65.89	48.05	gene=Cs8g17820 CDS=129-500	K02918|1|9e-61|233|cic:CICLE_v10029592mg|large subunit ribosomal protein L35e	GO:0030529//intracellular ribonucleoprotein complex	GO:0005198//structural molecule activity	GO:0010467//gene expression	gi|567864172|ref|XP_006424735.1|/5.05986e-60/hypothetical protein CICLE_v10029592mg [Citrus clementina]
Cs9g03480	Cs9g03480.1	125.63	125.98	121.64	4972.33	120.02	138.18	105.83	128.36	117.85	104.89	113.56	124.23	110.65	113.32	123.49	99.37	115.32	104.46	gene=Cs9g03480 CDS=159-1112	-	-	-	-	gi|567906469|ref|XP_006445548.1|/4.81281e-167/hypothetical protein CICLE_v10015980mg [Citrus clementina]
Cs9g14610	Cs9g14610.1	125.32	58.38	114.51	4972.33	126.99	141	58.88	90.51	82.09	56.84	50.26	66.54	117.46	111.83	96.51	104.28	130.89	129.09	gene=Cs9g14610 CDS=451-1647	-	-	-	-	gi|568873999|ref|XP_006490112.1|/0/PREDICTED: BAG family molecular chaperone regulator 7-like [Citrus sinensis]
Cs9g18840	Cs9g18840.1	125.32	151.49	142.12	4972.33	126.44	117.2	65.1	81.68	84.35	72.07	138.9	120.6	72.43	69.41	85.09	66.6	61.38	62.22	gene=Cs9g18840 CDS=738-1367	K05747|1|1e-22|108|egr:104421114|Wiskott-Aldrich syndrome protein	-	-	-	gi|641837904|gb|KDO56853.1|/6.32447e-64/hypothetical protein CISIN_1g023810mg [Citrus sinensis]
Cs3g17470	Cs3g17470.1,Cs3g17470.2	125.22	170.9	155.42	4972.33	162.51	147.54	75.76	72.11	75.27	78.31	101.2	70.54	54.36	49.18	48.21	54.57	54.35	64.91	gene=Cs3g17470 CDS=175-933	K06630|1|7e-138|491|cit:102630125|14-3-3 protein epsilon	-	GO:0005515//protein binding;GO:0005515//protein binding	-	gi|568836973|ref|XP_006472507.1|/4.04753e-137/PREDICTED: 14-3-3-like protein B-like [Citrus sinensis]
Cs2g18380	Cs2g18380.1	125.16	141.62	120.57	4972.33	121.73	114.05	92.01	125.17	132.01	96.64	120.27	135.23	49.78	46.26	51	46.22	56.86	47.81	gene=Cs2g18380 CDS=85-927	K01166|1|2e-161|569|cit:102616155|ribonuclease T2 [EC:3.1.27.1]	-	GO:0003676//nucleic acid binding;GO:0016892//endoribonuclease activity, producing 3'-phosphomonoesters	-	gi|568830144|ref|XP_006469367.1|/9.30263e-161/PREDICTED: ribonuclease 2-like [Citrus sinensis]
orange1.1t00541	orange1.1t00541.1,orange1.1t00541.2	124.95	155.03	142.22	4972.33	122.38	135.58	91.13	108.87	106.83	111.3	115.95	108.61	108.67	93.7	87.54	90.24	74.18	80.7	gene=orange1.1t00541 CDS=121-516	K10534|1|8e-17|88.2|eus:EUTSA_v10003628mg|nitrate reductase (NAD(P)H) [EC:1.7.1.1 1.7.1.2 1.7.1.3]	-	-	-	gi|567904570|ref|XP_006444773.1|/1.41141e-70/hypothetical protein CICLE_v10022828mg [Citrus clementina]
Cs3g03690	Cs3g03690.1	124.95	91.49	108.49	4972.33	115.62	114.57	133.07	115.21	114.15	132.51	100.52	122.57	112.81	115.8	102.9	93.96	103.12	106.01	gene=Cs3g03690 CDS=1-1764	K17087|1|0.0|990|cit:102609631|transmembrane 9 superfamily member 3	GO:0031224//intrinsic component of membrane	-	-	gi|568833698|ref|XP_006471014.1|/0/PREDICTED: transmembrane 9 superfamily member 3-like [Citrus sinensis]
Cs5g06110	Cs5g06110.1	124.84	169.68	137.11	4972.33	145.31	101.98	142.82	152.89	154.31	131.26	174.03	157.4	100.29	100.96	110.54	120.47	99.34	114.02	gene=Cs5g06110 CDS=1-2451	K17987|1|0.0|1526|cit:102622663|next to BRCA1 gene 1 protein	-	-	-	gi|568846077|ref|XP_006476884.1|/0/PREDICTED: uncharacterized protein LOC102622663 isoform X1 [Citrus sinensis]
Cs1g01980	Cs1g01980.1,Cs1g01980.2,Cs1g01980.3,Cs1g01980.4	124.8	80.52	113.51	4972.33	127.7	155.38	82.32	97.11	72.76	72.67	60.09	66.05	111.96	96.07	88.26	71.23	87.91	73.87	gene=Cs1g01980 CDS=35-373	K02908|1|3e-55|216|cic:CICLE_v10026806mg|large subunit ribosomal protein L30e	GO:0030529//intracellular ribonucleoprotein complex;GO:0030529//intracellular ribonucleoprotein complex;GO:0030529//intracellular ribonucleoprotein complex;GO:0030529//intracellular ribonucleoprotein complex	GO:0005198//structural molecule activity;GO:0005198//structural molecule activity;GO:0005198//structural molecule activity;GO:0005198//structural molecule activity	GO:0010467//gene expression;GO:0010467//gene expression;GO:0010467//gene expression;GO:0010467//gene expression	gi|641839231|gb|KDO58164.1|/1.0576e-66/hypothetical protein CISIN_1g047379mg, partial [Citrus sinensis]
Cs5g20950	Cs5g20950.1,Cs5g20950.2,Cs5g20950.3,Cs5g20950.4,Cs5g20950.5,Cs5g20950.6,Cs5g20950.7	124.58	150.13	129.89	4972.33	153.3	119.8	144.92	152.15	163.37	153.29	156.32	147.66	227.56	225.18	221.5	162.63	199.51	147.9	gene=Cs5g20950 CDS=551-2401	K01303|1|8e-06|37.0|csv:101207866|acylaminoacyl-peptidase [EC:3.4.19.1]	-	-	-	gi|567899222|ref|XP_006442099.1|/0/hypothetical protein CICLE_v10018865mg [Citrus clementina]
Cs8g02620	Cs8g02620.1	124.47	205.29	146.6	4972.33	159.19	105.31	19.22	32.98	32.03	16.7	42.95	21.76	82.26	66.62	86.58	61.04	68.08	51.75	gene=Cs8g02620 CDS=210-674	K10752|1|3e-67|255|mdm:103421028|histone-binding protein RBBP4;K00430|2|4e-09|62.8|mdm:103431979|peroxidase [EC:1.11.1.7];K07213|3|4e-09|62.8|brp:103855579|copper chaperone	-	GO:0043169//cation binding	GO:0006812//cation transport	gi|567859874|ref|XP_006422591.1|/3.36586e-84/hypothetical protein CICLE_v10029481mg [Citrus clementina]
Cs5g03400	Cs5g03400.1	124.33	147.78	140.64	4972.33	141.35	117.45	98.26	101.98	94.74	77.26	91.56	85.85	81.04	85.17	81.25	82.36	83.81	75.53	gene=Cs5g03400 CDS=1-2943	K01256|1|0.0|1909|cit:102626303|aminopeptidase N [EC:3.4.11.2]	-	-	-	gi|568845356|ref|XP_006476539.1|/0/PREDICTED: puromycin-sensitive aminopeptidase-like isoform X1 [Citrus sinensis]
Cs2g24100	Cs2g24100.1,Cs2g24100.2	124.32	87.57	119.26	4972.33	110.97	134.57	40.13	72.02	49.69	41.7	43.01	58.22	77.07	74.09	77.51	67.36	73.87	63.76	gene=Cs2g24100 CDS=79-927	K00235|1|3e-151|535|cit:102624270|succinate dehydrogenase (ubiquinone) iron-sulfur subunit [EC:1.3.5.1]	-	GO:0051540;GO:0000104//succinate dehydrogenase activity;GO:0051540;GO:0000104//succinate dehydrogenase activity	GO:0009060//aerobic respiration;GO:0009060//aerobic respiration	gi|567909783|ref|XP_006447205.1|/1.57711e-150/hypothetical protein CICLE_v10016181mg [Citrus clementina]
Cs4g01700	Cs4g01700.1	124.27	166.62	127.66	4972.33	139.85	112.44	68.28	98.45	74.47	38.93	55.6	56.47	138.1	123.36	135.76	121.39	160.04	118.68	gene=Cs4g01700 CDS=153-635	K03263|1|4e-89|328|cic:CICLE_v10009759mg|translation initiation factor 5A	-	GO:0043021//ribonucleoprotein complex binding;GO:0008135//translation factor activity, RNA binding	GO:0006448//regulation of translational elongation;GO:0006449//regulation of translational termination;GO:0018205//peptidyl-lysine modification	gi|567923240|ref|XP_006453626.1|/2.46491e-88/hypothetical protein CICLE_v10009759mg [Citrus clementina]
Cs3g01450	Cs3g01450.1	124.17	97.02	109.35	4972.33	109.96	112.64	85.54	82.18	95.79	58.69	58.41	73.71	93.68	96.64	98.1	88.91	81.32	77.77	gene=Cs3g01450 CDS=234-2015	K17087|1|0.0|913|zma:100284948|transmembrane 9 superfamily member 3	GO:0043231//intracellular membrane-bounded organelle;GO:0031224//intrinsic component of membrane	-	-	gi|568833229|ref|XP_006470811.1|/0/PREDICTED: putative phagocytic receptor 1b-like [Citrus sinensis]
Cs6g03280	Cs6g03280.1,Cs6g03280.2,Cs6g03280.3,Cs6g03280.4,Cs6g03280.5,Cs6g03280.6	123.42	83.71	121.91	4972.33	121.3	164.9	45.45	86.54	66	25.87	65.34	80.9	81.36	73.07	81.8	62.99	92.31	78.52	gene=Cs6g03280 CDS=51-1175	K08057|1|1e-168|593|cic:CICLE_v10011848mg|calreticulin	GO:0043231//intracellular membrane-bounded organelle;GO:0043231//intracellular membrane-bounded organelle;GO:0043231//intracellular membrane-bounded organelle;GO:0043231//intracellular membrane-bounded organelle;GO:0043231//intracellular membrane-bounded organelle;GO:0043231//intracellular membrane-bounded organelle	GO:0046872//metal ion binding;GO:0005515//protein binding;GO:0046872//metal ion binding;GO:0005515//protein binding;GO:0046872//metal ion binding;GO:0005515//protein binding;GO:0046872//metal ion binding;GO:0005515//protein binding;GO:0046872//metal ion binding;GO:0005515//protein binding;GO:0046872//metal ion binding;GO:0005515//protein binding	GO:0044267//cellular protein metabolic process;GO:0044267//cellular protein metabolic process;GO:0044267//cellular protein metabolic process;GO:0044267//cellular protein metabolic process;GO:0044267//cellular protein metabolic process;GO:0044267//cellular protein metabolic process	gi|568853665|ref|XP_006480467.1|/0/PREDICTED: calreticulin-3-like isoform X2 [Citrus sinensis]
Cs2g12010	Cs2g12010.1,Cs2g12010.2,Cs2g12010.3,Cs2g12010.4	123.37	220.71	159.32	4972.33	156.84	135.6	142.38	172.61	201.48	252.42	289.92	226.57	179.06	140.43	206.49	273.8	175.31	230.71	gene=Cs2g12010 CDS=291-944	-	-	-	-	gi|568828543|ref|XP_006468602.1|/7.39934e-57/PREDICTED: plasma membrane-associated cation-binding protein 1-like isoform X1 [Citrus sinensis]
orange1.1t04985	orange1.1t04985.1	123.25	87.33	122.02	4972.33	124.28	159.45	110.49	97.92	75.05	85.8	59.99	61.6	145.46	136.81	109.95	102.84	114.17	99.86	gene=orange1.1t04985 CDS=290-658	K02969|1|2e-63|244|cic:CICLE_v10006225mg|small subunit ribosomal protein S20e	GO:0030529//intracellular ribonucleoprotein complex	GO:0003676//nucleic acid binding;GO:0005198//structural molecule activity	GO:0010467//gene expression	gi|567858098|ref|XP_006421732.1|/1.03562e-62/hypothetical protein CICLE_v10006225mg [Citrus clementina]
Cs7g14410	Cs7g14410.1,Cs7g14410.2,Cs7g14410.3	123.05	150.39	125.67	4972.33	136.62	122.71	60.65	53.97	58.12	63.13	50.83	48.08	69.93	64.72	69.49	70.58	59.06	54.08	gene=Cs7g14410 CDS=272-679	K00121|1|5e-38|159|cit:102628355|S-(hydroxymethyl)glutathione dehydrogenase / alcohol dehydrogenase [EC:1.1.1.284 1.1.1.1]	-	-	-	gi|568862250|ref|XP_006484598.1|/8.06031e-85/PREDICTED: uncharacterized protein LOC102628651 isoform X2 [Citrus sinensis]
Cs7g13800	Cs7g13800.1,Cs7g13800.2,Cs7g13800.3,Cs7g13800.4	122.94	76.29	107.8	4972.33	115.25	122.82	77.26	57.24	47.86	49.58	30.24	28.32	91.15	99.78	71.6	51.5	64.53	53.1	gene=Cs7g13800 CDS=162-962	K14563|1|5e-110|399|cic:CICLE_v10032221mg|rRNA 2'-O-methyltransferase fibrillarin [EC:2.1.1.-]	GO:0031981//nuclear lumen;GO:0031981//nuclear lumen;GO:0031981//nuclear lumen	GO:0003723//RNA binding;GO:0016741;GO:0003723//RNA binding;GO:0016741;GO:0003723//RNA binding	GO:0006399//tRNA metabolic process;GO:0042254//ribosome biogenesis;GO:0006730//one-carbon metabolic process;GO:0009451//RNA modification;GO:0006399//tRNA metabolic process;GO:0042254//ribosome biogenesis;GO:0006730//one-carbon metabolic process;GO:0009451//RNA modification;GO:0042254//ribosome biogenesis;GO:0009451//RNA modification	gi|571460913|ref|XP_006581843.1|/1.29031e-86/PREDICTED: mediator of RNA polymerase II transcription subunit 36a-like isoform X2 [Glycine max]
Cs5g03290	Cs5g03290.1,Cs5g03290.2,Cs5g03290.3,Cs5g03290.4	122.63	137.45	138.95	4972.33	131.25	150.67	135.28	153.95	159.29	170.27	153.83	190.55	116.88	108.37	113.81	121.58	111.07	119.91	gene=Cs5g03290 CDS=935-1537	-	GO:0016020//membrane;GO:0016020//membrane	-	-	gi|568845312|ref|XP_006476520.1|/2.87344e-97/PREDICTED: uncharacterized protein LOC102621112 [Citrus sinensis]
Cs2g15260	Cs2g15260.1,Cs2g15260.2	122.58	174.54	115.62	4972.33	145.83	121.37	94.84	92.81	110.2	195.55	132.22	124.6	190.32	170.95	227.38	167.51	177.17	199.82	gene=Cs2g15260 CDS=158-517	-	-	-	-	gi|568829356|ref|XP_006468989.1|/5.74293e-07/PREDICTED: glycine-rich protein A3-like [Citrus sinensis]
Cs6g09300	Cs6g09300.1	122.51	114.71	108.57	4972.33	111.48	123.66	55.28	101.58	98.4	119.37	196.3	226.12	98.46	96.53	81.56	77.88	90.98	71.83	gene=Cs6g09300 CDS=387-1064	K12638|1|8e-25|115|csv:101217830|3-epi-6-deoxocathasterone 23-monooxygenase [EC:1.14.13.112]	-	-	-	gi|567873807|ref|XP_006429493.1|/6.3276e-98/hypothetical protein CICLE_v10012679mg [Citrus clementina]
orange1.1t01462	orange1.1t01462.1	122.45	135.77	124.2	4972.33	107.69	150.34	15.99	22.57	16.69	15.78	13.45	18.38	45.46	44.43	31.77	45.84	46.53	28.97	gene=orange1.1t01462 CDS=1-294	K11353|1|1e-37|154|cic:CICLE_v10006172mg|NADH dehydrogenase (ubiquinone) 1 alpha subcomplex subunit 13	GO:0030964//NADH dehydrogenase complex;GO:0005746//mitochondrial respiratory chain	GO:0016651//oxidoreductase activity, acting on NAD(P)H	GO:0043094//cellular metabolic compound salvage;GO:0003006//developmental process involved in reproduction	gi|567854781|ref|XP_006420510.1|/8.1512e-37/hypothetical protein CICLE_v10006172mg [Citrus clementina]
Cs3g15750	Cs3g15750.1	122.28	118.22	106.62	4972.33	117.87	123.12	154.54	140.75	189.14	216.38	219.75	205.69	152.68	155.23	203.95	195.95	184.75	222.49	gene=Cs3g15750 CDS=316-1509	K01184|1|7e-11|69.7|egr:104416134|polygalacturonase [EC:3.2.1.15]	-	GO:0048037//cofactor binding	GO:0008152//metabolic process	gi|568836475|ref|XP_006472269.1|/0/PREDICTED: 3-oxo-Delta(4,5)-steroid 5-beta-reductase-like [Citrus sinensis]
Cs2g04450	Cs2g04450.1	122.1	101.91	121.16	4972.33	109.72	124.77	94.56	105.73	96.3	83.59	72.84	77.49	105.33	107.5	102.24	91.5	91.64	86.65	gene=Cs2g04450 CDS=1-2202	K10956|1|0.0|1014|cic:CICLE_v10014773mg|protein transport protein SEC61 subunit alpha	GO:0044464	GO:0008320//protein transmembrane transporter activity	GO:0006810//transport	gi|567914475|ref|XP_006449551.1|/0/hypothetical protein CICLE_v10014773mg [Citrus clementina]
[truncated: 25,226 more rows]

## Sheet: Table S4
Table S4 Gene expression levels detected by RNA-seq
ZQ
[truncated: 92,859 more rows]

## Sheet: Table S5
Table S5 Differentially expressed genes in response to Fe deficiency
ZQ
[truncated: 732 more rows]

## Sheet: Table S6
Table S6 GO analysis of the differentially expressed genes
[truncated: 552 more rows]

## Sheet: Table S7
Table S7 Pathways of the differentially expressed genes by KEGG analysis
[truncated: 174 more rows]
